# Supplementary material for: Beliefs and Risk Perceptions About COVID-19: Evidence From Two Successive French Representative Surveys During Lockdown
Source: Front Psychol. 2021 Feb 1;12:619145. doi: 10.3389/fpsyg.2021.619145 (PMC7882490; doi:10.3389/fpsyg.2021.619145)
Supplement: Supplementary file 2 [file Data_Sheet_1.ZIP]

Archive with 17 entries (16 files):
- DATAset_used_in_manuscript.txt
- __MACOSX/
- __MACOSX/._DATAset_used_in_manuscript.txt
- donnees-hospitalieres-classe-age-covid19-2020-08-16-19h00.csv
- __MACOSX/._donnees-hospitalieres-classe-age-covid19-2020-08-16-19h00.csv
- donnees-hospitalieres-covid19-2020-08-16-19h00.csv
- __MACOSX/._donnees-hospitalieres-covid19-2020-08-16-19h00.csv
- Evidence_Age.txt
- __MACOSX/._Evidence_Age.txt
- Evidence_Gender.txt
- __MACOSX/._Evidence_Gender.txt
- Evidence_Region.txt
- __MACOSX/._Evidence_Region.txt
- raw_data.txt
- __MACOSX/._raw_data.txt
- readme.txt
- __MACOSX/._readme.txt
