# Supplementary material for: Beliefs and Risk Perceptions About COVID-19: Evidence From Two Successive French Representative Surveys During Lockdown
Source: Front Psychol. 2021 Feb 1;12:619145. doi: 10.3389/fpsyg.2021.619145 (PMC7882490; doi:10.3389/fpsyg.2021.619145)
Supplement: Supplementary file 2 [file Data_Sheet_1.ZIP › DATAset_used_in_manuscript.txt]

143056881990696	1	1.0905814	0	2	53	4	1	2	5	2	9	2	2	1	2	6	1		7		7				1		90	2
143056882139184	1	1.1124031	1	1	55	4	2	3	2	2	13	1	2	1	1	4	5	9	9	7	9	9	1	4	1		1	2
143056882322490	1	0.753819	1	2	59	4	2	3	2	2	7	3	2	1	2	12	9	6	8	3	8	7	1	4	50	20	10	2	2
143056882692169	1	0.7723414	1	1	45	3	2	3	3	3	2	2	1	1	2	28	10	8	10	8	10	8	10	2	30	80	60	3	3
143056882765900	1	0.4828921	0	2	59	4	2	2	4	2	13	2	1	1	2	24	5	5	8	5	7	4	0	3	70		70	4
143056882847827	1	0.3798173	1	1	81	6	2	2	1	3	11	2	1	1	1	12	3	7	10	7	8	2	1	2	20	85	75	3	3
143056882863189	1	1.0997715	0	2	34	2	1	3	3	3	9	2	1	1	1	9	6	9	5	9	10	5
143056882867288	1	0.4713959	0	2	33	2	2	3	1		9	2		1	1	8	6	7	8	6	8	6
143056882965599	1	0.4584399	1	2	65	5	2	2	1	2	8	2	1	1	1	16	10	8	10	7	10	8	1	8	60	40	65	3	3
143056882966624	1	0.5799415	0	1	52	4	2	3	2	3	11	2	2	1	1	8	7	7	9	6	8		2	3			5
143056882974818	1	0.6607564	0	2	45	3	2	3	3	1	4	2	1	1	2	14	9	9	10	9	10	8	50	3	80	80	95	2	2
143056883070052	1	0.4587449	0	1	70	6	2	3	1	2	2	2	2	1	1	8	8		9	5	9						50
143056883131497	1	1.0076129	0	1	40	3	2	2	2	3	7	1	1	1	1	8	7	7	9	5	7	4	2	4	30	50	70	3	2
143056883135596	1	0.5371076	0	1	68	5	1	2	1	1	7	2	2	1	1	9	0	8	9	8	9		2	4	0	50	60	1	3
143056883135597	1	0.7672765	0	2	57	4	2	2	3	2	9	1	1	1	1	4	7	8	9	9	9	7		10
143056883162227	1	1.2954662	0	1	62	5	1	1	1		13	2	1	1	1	10		3	10	10	8	5	25	20	20	50	40	3	3
143056883181687	1	3.1411512	1	1	83	6	1	1	1	3	4	2	2	1	1	8	5	8	8	6	7	7	1	2
143056883186809	1	4.1932311	0	1	81	6	1	1	1	3	1	2	1	1	1	8	8	7	8	8	8	5	30
143056883187834	1	1.1443747	1	2	46	3	1	2	3	3	1	2	1	1	2	6	4	6	7	6	7	6	1	3	30	50	5	2	3
143056883192955	1	0.2466297	1	1	57	4	2	2	1		13	2	1	1	1	6	8	6	10	6	10	6	1	7	10		20	4
143056883269643	1	0.3568474	0	1	67	5	1	3	1	1	2	3	2	1	1	12	9		10	0	10	0			0			3
143056883291150	1	1.0857456	1	2	54	4	1	1	5	3	3	1	1	1	1	4	0		0		0
143056883335189	1	0.7470949	0	2	57	4	2	2	2	2	9	2	1	1	2	6		7	9	8	9		1	3
143056883399707	1	0.6001675	1	1	32	2	2	3	2	1	4	2	2	1	1	22	7	5	6	6	8	7	5	10	10			5
143056883441698	1	0.7416769	1	2	68	5	2	3	1	3	11	2	1	1	2	8	7	9	9	4	5	6	1	2			30
143056883444771	1	1.1999766	1	2	51	4	2	3	2	2	5	2	2	1	2	5	5	5	7	6	7	3	1	4	10		2	3
143056883615795	1	1.0609724	1	1	51	4	2	3	2	3	4	2	1	1	1	16	6	6	9	6	7	8	3	5			50
143056883673144	1	0.7174024	0	2	39	2	2	3	2	3	1	2	1	1	1	10	2	5	5	8	8	2	5	3	10	50		2	2
143056883716161	1	0.3355517	0	1	59	4	2	3	1	3	1	3	2	1	2	12	8		10		10	3		10	50	50		3	3
143056883729479	1	0.7118069	1	1	38	2	1	3	2	3	2	2	1	1	1	16	3	8	9	7	7	10	1	3	80	50	80	2	3
143056883832910	1	0.5942231	1	1	54	4	1	2	3	3	2	2	2	1	1	10	9	8	9	8	10	7
143056883914839	1	0.3933277	1	1	52	4	2	3	2	2	12	2	2	1	1	42	9	8	8	7	7
143056883926105	1	0.381505	0	2	72	6	2	3	1	2	9	3	2	1	2	6	5	8	10	8	9	7	4	7	5	40	30	3	2
143056883940443	1	0.3321519	1	1	37	2	2	3	1		3	2	1	1	1	19	8	6	9	5	8	7	6	20	60	80	60	3	2
143056883949663	1	1.3325415	1	2	50	4	1	1	2	1	4	2	1	1	1	8	5	10	10	10	5	5	15	15	25	10	25	4	3
143056883983459	1	0.425009	1	2	29	1	2	3	5	1	9	3		1	1	8			10	4	7						30
143056884125806	1	1.5685075	0	1	63	5	1	1	1	3	12	1	1	1	1	6	0	10	10	10	10	10	10	10	1		40	2
143056884190325	1	0.2839211	1	2	71	6	1	3	1	3	9	2	1	1	1	8	2	4	8	5	7	3			3	5	20	3	3
143056884260870	1	0.5969885	0	1	67	5	1	3	1	1	1	1		1	2	17	9	10	10	10	10	9	15	12	70	80	88	1	3
143056884265993	1	0.8700882	0	1	34	2	2	2	4	1	5	2	1	1	1	12	6	8	9	7	8	6	50	60	50	20	70	3	3
143056884440108	1	1.6492604	0	2	22	1	1	1	2	1	2	2	1	1	1	28	5	6	5	5	5	5	10	20	5			3
143056884440109	1	0.5112289	1	1	50	4	1	3	2	1	9	2	2	1	1	12	9		8	8	9	8
143056884503612	1	0.2011765	1	1	27	1	2	2	4	1	13	1	1	1	1	28	10	10	10	10	10	10		50	80	99		4	1
143056884516927	1	3.6211476	1	2	65	5	1	1	1	3	2	2	2	1	1	8	5	6	7	8	10	8
143056884538435	1	0.4569138	0	1	24	1	1	2	5	3	9	1	1	1	1	8	6	3	7	3	4	4	1	4	40	30	30	3	3
143056884616276	1	3.7405034	0	2	76	6	2	1	1	3	5	1	1	1	1	12	8	7	6	7	6	2	3	1	2	67	28	2	3
143056884621397	1	1.3994583	0	1	49	3	2	1	2	3	2	2	2	1	1	6	7	8	10	8	10	8	20		50	50	20	3	3
143056884649049	1	0.7708304	1	2	68	5	1	3	1		4	3	2	1	1	19	2	5	6	3	5	5	1	2		60	40		3
143056884764782	1	1.4617342	1	1	79	6	1	1	1	1	2	2	2	1	1	8	5				7
143056884782195	1	0.3948176	1	2	26	1	1	3	5	1	3	2	2	1	1	8	10	10	10	9	9		5	2			80
143056884848642	1	2.140348	0	2	63	5	1	1	1	3	8	2	2	1	1	8	3	5	5	2	7	5	3	10	2	50	70	4	4
143056884879367	1	0.5432191	1	2	26	1	2	3	2	3	9	2	1	1	1	11		8	7	8	8		35	30		50	68		5
143056885126204	1	0.4272282	0	1	22	1	1	3	2	1	9	1	1	1	2	3	2	6	8	5	7	2	1	3	2	65	30	2	2
143056885126205	1	1.0821579	0	2	45	3	2	1	2	3	9	1	2	1	2	12	4	4	6	5	7	5	3	4	20	40	15	3	3
143056885250142	1	0.5634673	1	1	30	2	2	3	2	3	11	3	2	1	1	25	10	7	10	9	10	9	5	7	70	50	70	1	2
143056885382145	1	0.3041957	0	2	22	1	2	2	2	1	13	2	1	1	1	16	8	7	7	10	8	8	27	27	27	27	27	2	3
143056885786718	1	1.1107135	1	1	20	1	2	3	1	1	7	2	1	1	1	12	5	10	8	8	8	6	10	4	60	50		3	3
143056886292566	1	0.4831675	0	2	81	6	2	2	1	3	13	2	2	1	1	14	8		9	9	8	8				30	30		3
143056886994969	1	0.2889559	0	2	32	2	2	2	2	3	1	2	1	1	2	8	8	7	9	7	9	3	1	1	30	90	70	2	2
143056887762957	1	0.8646866	0	1	38	2	2	3	3	3	2	2	1	1	2	12	7	1	3	4	5	8	3	3	80	50	60	3	3
143056887772177	1	1.5277844	1	1	27	1	1	1	1	1	7	3	2	1	1	8	10	7	8	6	8	8	1	10	50		50	3
143056887783447	1	0.5920248	1	1	38	2	2	3	2	3	10	2	1	1	1	12	8	8	10	7	9	4	10	20	30	70	65	3	3
143056888251450	1	0.5914051	0	1	34	2	2	2	3	3	1	1	1	1	1	4	8	7	10	7	9	3	5	20	10	50	60	3	3
143056888336492	1	2.0532011	0	1	24	1	2	1	2	3	5	2	1	1	1	8	4	7	8	8	8	3	65	85	20	15	70	2	1
143056888350838	1	0.4447451	1	1	53	4	1	3	3	3	13	2	1	1	1	28	10	6	10	7	9	5			50		80	3
143056888350839	1	0.491376	0	1	37	2	2	3	3	3	2	2	2	1	1	20	9	9	10	9	7	9	4	2	58	50	75	3	3
143056888368145	1	0.9388873	1	1	55	4	2	1	1		3	3	2	1	1	11	7	8	8	9	10		25	45		85	65		3
143056888374293	1	1.82433	0	1	37	2	2	1	2	1	5	1	1	1	1	8	5	5	5	5	5	5	10	10	5	5	30	3	3
143056888386616	1	2.4772924	1	1	18	7	1	1	5	1	8	3	2	1	1	20	9	6	10	5	8	8	2	10	50	20	80	3	3
143056888387644	1	0.4237189	1	1	58	4	1	3	2	3	1	2	2	1	1	14	10	7	10	7	8	9	2	3	20	9	45	2	3
143065114660866	1	1.6606921	1	2	80	6	1	1	1	2	10	3	1	1	1	5	7	5	7	5	7	3	1	5	3	4	5	3	3
143065114672132	1	0.6413014	0	2	59	4	2	3	3	2	9	3	1	1	1	8	10	10	10	10	10	10	100	100	100	0	100	1	1
143065114678277	1	0.5793728	1	1	51	4	1	3	2	1	9	2	1	1	1	22	7		7		10		1	3	50	50	10	3	4
143065114738700	1	0.9931386	1	2	59	4	1	2	4	2	7	2	1	1	1	12	3	7	9	5	5	5	1	1	50	70	30	3	3
143065114782743	1	0.3281138	1	2	51	4	2	2	2	3	9	2	2	1	1	5	4	6	2	4	2		1	3	1	10	1	1	2
143065114806301	1	0.2904759	0	1	70	6	1	2	1	3	8	3		1	1	16	10	10	10	10	10	5
143065114808350	1	0.2957969	0	2	75	6	2	2	1		9	2	1	1	1	8	7	4	9	5	10	8				6			3
143065114840099	1	0.4127161	1	2	80	6	2	2	1	2	1	2	2	1	1	28	8	7	9	7	9	7	2	10	50	60	60	2	2
143065114859559	1	2.9047924	0	1	75	6	2	1	1	3	9	2	1	1	1	6	8		9	8	8	2		30			30
143065114885163	1	0.3774295	0	2	84	6	2	2	1	2	1	2	1	1	2	6	7	7	10	7	9	5	5	10	10	10	15	3	3
143065114888236	1	0.3282044	0	1	65	5	2	3	1	2	13	2	2	1	1	8	7	7	9	9	10	7	10	10	1	20	5	3	3
143065114891310	1	0.9115881	1	1	57	4	2	1	2	1	3	2	2	1	2	16	10	5	10	5	10	5	15	80	80	30	30	2	2
143065114958904	1	0.4849952	0	1	70	6	1	3	1	1	9	2	2	1	2	12	4	6	7	6	7	6	3	7	30	40	40	3	3
143065114961977	1	0.9295079	1	2	35	2	2	2	2		9	1	1	1	2	24	8	7	9	4	5	2	0	1	25	50	50	3	4
143065114988606	1	0.7958913	1	2	44	3	2	3	3	3	10	3	2	1	2	10	8		8	3	9	8		1
143065115000899	1	0.5994419	1	2	76	6	2	2	1	2	11	2	2	1	1	48	9	7	9	5	9	8	2
143065115014213	1	0.7957638	0	2	60	5	2	3	2	2	13	2	2	1	2	12	6	5	8	5	8	5	10	30	20	40	30	4	3
143065115018310	1	0.3285721	0	2	75	6	2	3	1	3	4	2	2	1	1	12	3	8	10	7	8	9		3	5	50		3	3
143065115048011	1	1.408607	1	2	42	3	2	2	2	3	9	2	1	1	2	8	9	7	9	7	9	3	1	3			5
143065115056204	1	1.4010388	0	1	35	2	2	2	4	2	9	2	1	1	2	24	6	8	10	7	8	9	5	20	90	50	80	1	2
143065115071569	1	0.5085279	0	1	66	5	1	3	1	2	11	2	2	1	1	8	7	4	9	6	9	6	1	6	50	50	70	4	3
143065115088981	1	0.2929369	1	2	69	5	2	3	1	3	12	2	1	1	2	12	1	9	5	9	9		2	2	50	5	90	2	2
143065115090006	1	3.4886664	0	2	73	6	2	1	1	3	13	2	1	1	1	9	2	10	10	9	10	5	10		40	50	2	3	3
143065115111517	1	0.5209749	1	2	75	6	2	3	1		13	1	1	1	1	6	3	9	10	5	9	3	2	3	3	5	5	2	3
143065115132002	1	1.0173507	0	1	34	2	1	2	3	3	8	2	1	2	1	4	2	5	8	4	7		1	3	15	20	35	2	2
143065115150439	1	0.4007041	1	1	59	4	2	3	2	3	2	2	1	1	2	8
143065115186288	1	0.8234581	0	2	68	5	1	1	1		13	2	2	1	1	6	9	9	10	8	10	8	5	10			25
143065115251839	1	0.3282044	1	1	74	6	2	2	1	2	13	2	2	1	2	4		8	9	8	9	7	4	10	10	50	60	3	3
143065115268099	1	1.2666245	0	1	49	3	2	1	1	1	1	3	2	1	1	5	9		10		10	5			50			5
143065115303946	1	0.5374958	1	2	75	6	2	3	1	2	8	3	2	1	2	12	9	8	10	8	10	9	2	10	50	50	20	3	3
143065115831313	1	0.5213654	0	2	56	4	1	3	4	1	2	2	1	1	1	12	3	7	9	7	9	5	2	3	50	60	3	3	3
143065115857940	1	0.3927847	0	2	57	4	2	2	1	2	2	3	2	1	1	12	5	6	9	6	5	8	2	10	15	25	15	3	3
143065115870231	1	0.5080109	1	2	76	6	2	2	1		9	2	2	1	2	6	7	8	9	7	8	8	1	2	8	40	40	3	3
143065115874328	1	0.3747028	0	2	75	6	2	2	1	2	12	1	1	1	1	12	3	9	10	7	8	4	1	3	5		1	3
143065116145705	1	0.3645403	0	2	71	6	2	3	1	2	11	2	2	1	1	4	4	8	8	7	8	3		3	3	30	30	2	3
143065116150826	1	0.6703007	0	1	36	2	2	2	3		11	2	2	1	1	8	6	5	8	4	8	6	10	20			25
143065116194860	1	2.8719036	0	1	33	2	2	1	2	3	11	2	1	1	1	8	8	10	10	8	10	7	40	30	40	30	40	3	2
143065116236852	1	2.7823851	1	2	68	5	2	1	1	1	2	2	2	1	1	8	5	5	5	5	5	5
143065116242999	1	0.5507171	1	2	59	4	2	2	4	2	1	2	1	1	1	3	3	7	9	7	7	9	1	5	10	50	10	2	2
143065116250169	1	0.712774	0	1	76	6	1	3	1	2	11	3	2	1	1	20	8	7	10	7	9				50	40	35	3	3
143065116254266	1	1.0881677	0	1	43	3	2	3	2	3	12	2	1	1	2	12	6	4	9	4	8	3	1	4	30	50	35	3	3
143065116259387	1	1.2276836	1	1	43	3	2	3	2	3	1	2	1	1	1	8	8	8	8	7	7	2	3	1	20	50	20	2	4
143065116382277	1	0.5346723	0	1	47	3	2	3	3		2	2	1	1	2	6	9	6	9	6	9	8	1	5	70	50	85	2	2
143065116409929	1	1.1932785	0	1	39	2	2	3	3	3	11	2	1	1	1	6	7	5	8	7	8	5	10	30	30	60	30	3	3
143065116417098	1	1.9194107	1	2	57	4	2	1	4		13	2	1	1	1	8			7
143065116454992	1	1.908873	1	2	53	4	2	1	4	2	2	2	1	1	2	4	8	9	6	8	8	8
143065116493911	1	0.3868944	1	1	72	6	2	3	1	2	13	2	2	1	2	20	7	7	10	5	8	5	1	5	50	40	40	3	3
143065116500057	1	0.4280992	1	1	76	6	1	3	1	3	11	2	2	1	2	26		10	10	10	10	4			40			3
143065116537951	1	0.3774431	1	1	67	5	2	3	1	2	1	1	1	1	2	24	8	6	9	6	10	6	1	3	40	80	75	3	3
143065116560484	1	0.8410002	1	1	34	2	2	3	4	2	13	1	1	1	1	4	6	7	7	6	8	6	4	9	30	40	2	3	3
143065116568680	1	2.7675262	1	1	58	4	2	1	1	1	1	3	2	1	1	30	10	10	10	10	10	8	1	3	20	1	1	5	3
143065116649589	1	0.2569838	0	2	64	5	2	3	1		5	2	1	1	1	21	6	5	9	4	9	6	5	7	6			4
143065116661878	1	1.7954792	0	1	60	5	2	1	1	3	10	2	1	1	1	8	8	7	7	9	8	6	1		40		25	3
143065116751874	1	0.2324559	0	2	44	3	2	1	2		12	3	1	1	2	10	3	4	3	4	6	2	1	1	10	25	20	3	4
143065116760068	1	0.5495272	0	1	32	2	1	3	2	3	11	2	2	1	1	16	10	10	9	10	10	5	50	50	50	25	75	3	3
143065116788748	1	3.1411512	0	1	76	6	1	1	1	2	9	1	1	1	1	12	7	9	10	8	9	9	90	4	5	70		3	3
143065116788749	1	0.3352249	1	2	77	6	2	2	1		9	2	1	1	2	8	7	6	8	6	10	7			60	30	50	3	3
143065116814354	1	0.2857733	0	1	64	5	2	3	1		11	1	1	1	1	8	1	5	9	6	7	2			10	50	70	3	3
143065116825623	1	0.2296339	1	1	69	5	2	3	1	2	3	2	1	1	1	4	6	6	8	5	6	5	1	3	40			4
143065116835866	1	0.3040905	1	2	76	6	2	2	1	2	4	2	1	1	1	12	1	6	9	6	6	4	2	1	5	30	5	3	3
143065116872738	1	0.3386123	0	1	65	5	2	2	1	3	8	2	2	1	2	8	5	5	8	5	8	5	2	5	20	50	60	3	3
143065116892199	1	0.3587164	0	1	75	6	1	3	1		2	2	2	1	2	24	10	10	10	10	10	5			50			3
143065116896296	1	0.3363302	1	2	76	6	2	2	1	3	1	2	2	1	1	10			10	7	10
143065116901417	1	0.8239214	0	1	53	4	2	3	4	2	5	2	1	1	1	9	7	10	10	8	9	3
143065117099058	1	2.3021484	1	1	54	4	1	1	2	3	9	2	1	1	1	14	2	10	6	8	10	3				50	50		3
143065117153335	1	0.4108244	1	2	34	2	2	3	2	3	2	2	1	1	1	4	6	8	7	5	5	6	3	3	60	30	20	3	3
143065117185083	1	0.3121963	1	1	72	6	2	3	1		5	3	2	1	1	16	6	5	10	6	9	5	2	20			70
143065117228097	1	1.0791589	1	2	30	2	1	3	2	1	8	2	2	1	2	20	5	7	5	2	8	5	1	1	20	25	10	3	3
143065117231170	1	0.2148898	1	1	81	6	2	3	1	2	1	1	1	1	1	18		7	10	8	10	8	3	10	1	40	30	2	3
143065117245508	1	1.1742948	0	1	50	4	2	3	3	1	11	2		1	1	40	8	5	10	6	8	9		20	60	45	88	2	3
143065117292616	1	0.4707715	1	2	44	3	1	3	4		2	2	1	1	2	4	2	6	8	3	3	5					50
143065117311050	1	0.8800134	1	2	33	2	1	3	2	1	11	2	1	1	1	4	3	6	7	6	5	5	3	5	50	75	75	2	2
143065117360209	1	0.5181758	1	1	78	6	2	2	1		13	2	1	1	1	6	5	5	5	5	9	5
143065117382738	1	1.530436	0	1	72	6	2	1	1		12	2	1	1	1	13		8	9	8	9
143065117385811	1	0.6878307	0	1	39	2	1	2	3	3	9	2	1	1	2	24	9	6	10	7	10	8	5	18	20	70	65	3	2
143065117397078	1	0.46917	0	1	75	6	1	3	1	3	2	2	1	1	1	6	8	7	9	7	9	8	5		60	50		4	4
143065117411416	1	1.4571539	0	1	33	2	1	2	2	3	9	2	1	1	1	8	7	7	9	8	9	6	2	5			60
143065117426778	1	1.0680088	1	1	72	6	1	1	1	3	11	2	1	1	1	4	8	6	9	5	9	5			50			3
143065117446238	1	0.2921297	1	1	79	6	2	3	1	2	3	2	1	1	1	12	10	8	10	8	10	5	1	5			1
143065117453410	1	1.1260032	0	1	75	6	1	1	1		7	2	2	1	1	12	7	8	10	8	9	3	1	2	30	50		2	3
143065117533295	1	0.642203	0	1	44	3	2	3	2	3	2	1	1	1	2	16	7	6	10	7	8	9	4	8	5	70	60	2	2
143065117587574	1	2.0765248	0	1	75	6	2	1	1	1	9	2	1	1	1	12		7	9	4	8	5		6			65
143065117602938	1	0.4752572	0	2	78	6	1	3	1	3	13	2	2	1	1	4		7	8	7	8	6	3	2	5	5	15	4	4
143065117617276	1	0.7576625	0	2	43	3	2	3	2	2	10	1	1	1	1	6	5	7	8	7	8	5	1	5	50	25	50	1	1
143065117637759	1	0.3395838	1	1	68	5	2	2	1	3	7	1	2	1	1	28	7	8	10	9	8	2	5		2	20	80	2	3
143065117657088	1	0.9660276	1	2	64	5	2	3	2	3	11	2	2	1	1	14	6	8	10	10	10	9	50		10	80		3	3
143065117709319	1	0.7858175	0	1	75	6	2	1	1	3	5	2	2	1	1	26		8	10	8	10	6		70
143065117983753	1	0.5159162	1	2	67	5	2	3	1	2	8	2	2	1	1	6	3	8	8	8	8	7	15	15	20	30	15	4	3
143065117999115	1	0.5181758	0	1	75	6	2	2	1	3	13	2	1	1	1	10	5	8	9	6	8	7	5	3	70	50	10	3	3
143065118288911	1	0.5491709	0	1	47	3	2	3	2	2	10	2	2	1	2	4	3	5	8	6	8	2	60	10	5	20	20	2	2
143065118342168	1	0.9618188	0	2	34	2	2	3	2	3	11	2	2	1	1	10	8	7	9	9	10	6		12		1			4
143065118425113	1	0.487012	1	1	86	6	1	2	1	3	1	2	2	1	1	12		7	10	6	9	5	3	6	30		40	3
143065118448669	1	0.2077073	1	1	50	4	2	1	2	3	7	1	2	1	1	28	7	7	7	7	7	7	25	20	15	20		2	2
143065118461984	1	1.237957	0	1	32	2	2	1	1	1	8	2		1	1	8			9		10
143065118481446	1	0.4849952	0	1	70	6	2	2	1		9	3	2	1	1	28	8	7	10	5	10	4	5	20	30	60	30	3	3
143065119108143	1	0.5327505	1	1	35	2	2	3	2	3	13	2		1	2	16	10	8	10	7	8	7	4	10	80	80	75	3	3
143065119871035	1	0.3661782	0	2	65	5	2	3	1		9	2		1	1	16	8	7	10	7	10	5			80	90	70	2	2
143065119934527	1	2.1306764	1	1	65	5	1	1	1	1	1	2	2	1	1	8	7	7	7	8	9	4
143065120346182	1	0.7703968	1	1	53	4	2	1	2	3	10	2	2	1	1	22	6	6	6	6	8	8	20	20	60		75	3
143065120351303	1	1.5649028	0	1	39	2	1	1	4		12	2	2	1	1	8	10	9	10	8	10		8	15	50	40	70	3	3
143065120354376	1	0.4292462	1	1	64	5	2	3	1	3	1	2	1	1	1	20	5	4	8	7	6	3	1	1			40
143065120361546	1	0.7407457	0	2	32	2	2	3	2	1	12	2	1	1	1	8	8	6	9	6	8	5		5	60	80	80	4	3
143065120601168	1	1.2394578	1	2	58	4	2	1	2	1	2	2	1	1	1	18	1	5	3	5	5	3	10	8	6	60		3	4
143065120884820	1	0.2649099	0	1	49	3	2	2	1	3	2	3	2	1	2	16	1	6	8	5	8		4	2	40	50	20	4	4
143065121292385	1	1.6327084	1	2	56	4	2	1	2	3	9	2	1	1	1	24	8	9	10	7	9	8			50		80	2
143065121340517	1	0.4704867	0	1	40	3	1	3	2	1	2	2	1	1	2	8	10	10	10	10	10	6			50			3
143065122680948	1	0.2134987	0	1	55	4	2	3	3	3	10	2	1	1	2	13	7	8	8	9	8	7	1
143065122696309	1	1.0811444	1	2	53	4	2	1	2	1	8	2	1	1	1	10	1	7	8	7	9	6	10	20	5	40	30	3	3
143065122807927	1	1.7731213	0	1	30	2	2	1	2	1	2	2	1	1	1	6	3	2	8	5	7	3	30	40	4	50	60	2	3
143065122852986	1	3.7519489	1	1	75	6	2	1	1	1	9	2	1	1	1	14	5	5	5	5	10	5			50	30		3	3
143065122866300	1	0.6192762	0	1	28	1	2	3	2		5	1	1	1	1	6		3	2	8	4	2			25		50	3
143065122907138	1	1.3973095	0	1	38	2	2	3	4	3	3	2	1	1	2	24	8	7	9	8	9	5	5	10	50		50	3
143065122920452	1	0.7946766	0	1	33	2	2	2	3	3	9	2	1	1	1	14	5		8			4	1
143065122926597	1	0.8149593	1	2	71	6	2	1	1	3	9	2	2	1	1	8	5	7	7	8	10	5	1		50	50		5	3
143065123075081	1	3.4336063	1	2	46	3	2	1	2	3	7	2	1	1	2	6	5	7	7	6	7	4	3	2	20	40	60	3	3
143065123075082	1	1.0883584	1	2	47	3	1	1	5		4	2	1	1	1	7	0	7	8	6	8	1
143065123084299	1	0.5209749	1	2	81	6	1	2	1	2	13	2	1	1	1	8	5	10	10	5	10	5	2	4	20	50	10	3	3
143065123231763	1	0.5052814	0	1	75	6	2	3	1	2	9	2	1	1	1	8			10		10	7
143065123272726	1	0.5717227	0	1	71	6	2	3	1		9	2	2	1	2	8		9	9	8	9						40
143065123317789	1	1.257799	1	1	52	4	1	1	3	3	13	2	1	1	1	14	0			10	10	0		2	20		10	3
143065123318814	1	1.047051	1	1	35	2	2	2	4	1	11	1	1	1	1	12	4	8	8	5	8	2	2	1	10			3
143065123593250	1	0.3142449	1	2	66	5	2	2	1	3	8	1	1	1	2	8	5	7	10	6	8	2	1	1	2	10	2	2	3
143065123883049	1	2.0774018	0	1	23	1	1	1	5		3	2	1	1	1	4	4	6	8	3	8	3
143065123891244	1	0.8203993	0	2	40	3	2	3	2	3	7	2	1	1	1	5	7	8	9	9	9	9	30	60	60	60	60	3	3
143065123984437	1	0.5194935	1	1	43	3	2	3	5	1	9	2	1	1	2	12	8	8	7	8	8	5		5			60
143065124157507	1	0.3089618	1	1	74	6	1	2	1	3	9	2	2	1	1	16	5	4	5	7	8	8	1	2	2			2
143065124368460	1	0.5848716	1	1	24	1	2	3	2	3	4	1	1	1	1	6	6	10	10	9	9	7	15	10	20	50	60	3	3
143065124375630	1	0.2505595	0	2	61	5	2	3	1	1	9	2	1	1	1	8	8	3	8	5	10	2	2	5	0			1
143065124532314	1	0.6124479	0	2	23	1	2	3	2	3	4	1	1	1	1	22	9	8	8	7	8
143065124544606	1	1.2876768	1	1	55	4	1	3	3	3	7	2	1	1	1	8	4	6	8	6	8	7	1	1	10	30	15	2	2
143065124888681	1	0.6250021	1	1	25	1	2	3	2		12	1	1	1	1	6	5	3	7	4	8	5	5	30	50	50	60	4	3
143065124936811	1	0.275359	0	2	76	6	2	3	1	3	13	2	1	1	2	12	9	6	9	6	8	7		10	60		70	3
143065125175405	1	3.8315077	0	1	68	5	2	1	1		12	2	1	1	2	16	1	3	5	5	9	2			2		40	2
143065125181550	1	0.2550718	0	1	45	3	2	3	2	1	1	2	2	1	1	34	10	10	7	10	10	10	20	50	30	50	50	3	2
143065125478402	1	1.3522921	1	1	52	4	2	3	4		7	2	1	1	2	24	5	6	9	4	9	7	1	2			40
143065125749781	1	1.2264998	1	1	55	4	1	1	3	3	9	3	2	1	2	24	10	8	10	8	9	9	10	50	5	1	30	3	3
143065125900319	1	2.7638595	1	2	53	4	2	1	2	3	7	1	1	1	1	12	8	8	8	5	10	8	2	2	50	50	40	2	2
143065125909537	1	2.0886236	1	2	22	1	1	1	2	1	3	3	1	1	1	19	3	3	4	5	4	1
143065126228010	1	1.6371322	0	2	22	1	1	2	1	1	8	2	1	1	1	16	7	7	8	5	8	5	2	2	60	80	70	3	4
143065126251567	1	1.4228879	0	2	40	3	2	3	4	3	11	2	1	1	2	12	8	7	8	5	7	2	2	2	15	10	1	1	1
143065126442039	1	0.4588486	0	1	52	4	2	3	3	3	8	3	2	1	1	8	5		7		9
143065126457400	1	1.2798004	1	2	59	4	2	1	1	1	4	3	2	1	1	8	10	9	8	10	10	1	15	10	2	40	30	2	3
143065126526014	1	0.6668503	1	1	61	5	2	3	2	3	8	2	2	1	2	16	3	5	8	8	10
143065126815809	1	0.6396061	1	2	21	1	2	2	2	1	3	1	1	1	1	5	4	7	7	6	4	3	10	5	0	50	50	1	3
143065126988873	1	0.222359	0	2	34	2	2	3	5	1	11	2	1	1	2	6	8	8	7	8	6		2
143065127111759	1	1.676316	0	2	23	1	1	3	1		9	2	1	1	1	12	7	2		3		6
143065127141462	1	0.234871	0	1	57	4	2	3	1	3	8	1	1	1	1	6	0	6	10	6	8		1	2			80
143065127284826	1	0.3334238	1	1	76	6	1	2	1	2	9	1	1	2	1	6	0	8	9	7	8		5	8	0	50	50	2	2
143065127653477	1	0.6395024	0	2	48	3	2	3	2	3	7	2	1	1	1	25	6	6	7	6	8	8	3	5	5	10	20	3	3
143065127792747	1	0.3940178	0	1	74	6	2	2	1		1	2	2	1	1	18	9	8	10	8	10	9	5	3	90			2
143065127820401	1	0.5454336	0	2	41	3	1	3	1	3	4	2	2	1	1	8	1	3	6	5	5	3	2	3	5	60	4	1	1
143065127824499	1	0.2505595	0	2	53	4	2	1	2	1	4	2	2	1	2	8	9	9	10	6	10		2	1	10	0	100	5	2
143065127858303	1	0.6361094	0	2	24	1	2	3	2	3	12	1	1	1	2	12	7	6	8	4	7	8	2	4	75	30	65	2	2
143065128313863	1	0.2009808	1	1	22	1	2	2	2		9	1	1	1	2	5
143065128348682	1	0.6836077	1	1	46	3	1	3	5		4	3	2	1	1	22		7	10	7	10		40	30	50			5
143065128722448	1	0.5154714	0	2	66	5	2	2	1	2	10	2	1	1	2	4	6	6	9	8	5	5	15	3		75	50		3
143065128725522	1	0.7367658	0	1	31	2	2	3	2	3	12	2	1	1	1	28	5	5	10	5	7	3	2	4	40	50	60	1	1
143065129078818	1	0.6220832	0	1	76	6	1	2	1	3	1	2	1	1	1	8	5	5	9	5	10	5		10	20	0	20	3	5
143065129346089	1	0.7584277	1	2	38	2	2	3	2		1	2		1	1	10	7	8	9	9	10	6	3	5	40	75	25	3	3
143065129351212	1	0.4961362	1	2	79	6	2	2	1	3	8	3	2	1	2	25	7	3	1	7	10	8	20	9	50	30	15	3	2
143065129776177	1	0.5664412	0	2	75	6	2	3	1	3	2	1	2	1	1	8	5	7	8	6	9		2	3	3	10	20	2	2
143065129824306	1	0.9245605	0	1	58	4	1	1	2	3	4	2	2	1	1	8	7	7	9	7	10	5	7	20	50	20	25	3	2
143065130352702	1	0.9275621	0	1	36	2	1	2	2	2	1	1	1	1	2	4	8	8	9	8	8	9	2	3	90	50	30	1	2
143065130485835	1	0.7185211	1	2	31	2	1	2	2		3	2	1	1	1	20	5	4	5	6	4	5			10			3
143065130510418	1	0.7791151	0	1	77	6	1	1	1	3	9	2	1	1	1	16	9	8	9	8	10	5			100			2
143065130784865	1	0.8992303	1	1	21	1	1	3	1	1	10	2	1	1	1	3	5	3	7	1	4	6	1	2	50	70	40	2	4
143065130800229	1	0.4238066	1	1	54	4	1	2	4	3	13	1	1	1	2	6	9	8	8	6	9	7	1	5	60	70	50	3	3
143065130810473	1	1.6452232	0	1	61	5	2	1	1	1	4	3	2	1	1	14	4	8	9	5	9		2	4	20	40	70	2	3
143065130826860	1	3.0161048	1	1	57	4	2	1	1	3	8	2	1	1	1	12	8	6	9	8	10	5					50
143065131038836	1	0.5637817	1	1	75	6	2	3	1		12	2		1	1	4	5	7	9	7	9	7
143065131039862	1	0.8173378	0	1	39	2	2	3	3	3	11	1	1	1	1	6	2	8	8	5	3	3	1	1	10	50	60	3	3
143065131070585	1	0.5199492	0	1	29	1	2	2	3	2	9	1	1	1	1	12	8	5	9	7	9	9	1	1	70	50	70	3	4
143065131162750	1	1.0876192	0	2	30	2	2	3	2	3	3	2	1	1	1	4	7	8	8	8	8	7	20	25	30	70	40	2	2
143065131189249	1	0.7924237	1	1	33	2	2	3	5	1	1	2	1	1	1	8	8	6	9	7	7	5	2	3	30	40	50	3	4
143065131194371	1	0.5302325	0	1	67	5	1	3	1	3	9	2	1	1	2	8	6	4	10	8	9		5	6	20		20	4
143065131410439	1	0.9954726	1	2	22	1	1	3	1	1	2	2	2	1	1	23	8	5	8	6	8	7	2	10	70	40	35	2	2
143065131415564	1	0.6229093	1	1	44	3	2	3	5	1	8	1	1	1	1	8	2	2	2	2	2	2	30	30	20	60	60	1	1
143065131430928	1	3.4463449	1	2	68	5	1	1	1	1	9	2	1	1	1	20	9	9	9	9	10	5					50
143065131432977	1	0.9559449	0	1	34	2	2	3	5	1	4	2	1	1	1	8	3	6	9	8	9	6			50			3
143065131688990	1	1.0431736	0	2	61	5	1	1	5	1	8	2	2	1	1	4	9	5	10	6		5				60	70		3
143065132313684	1	3.3526917	0	1	65	5	1	1	1	3	3	2	1	1	1	8	8		10	7	10	8		75
143065132633179	1	3.3779154	1	1	88	6	1	1	1		2	3	1	1	1	4	6				10
143065133513834	1	0.5366424	1	2	27	1	2	3	2	1	12	2	2	1	1	8	8	9	9	6	10	6	16	70	50	45	50	2	2
143065133711469	1	0.5954515	0	1	55	4	2	3	2	2	11	2	2	1	1	16	8	6	9	7	9	7	20	20	50	50	70	3	3
143065134287990	1	1.1849366	0	2	22	1	1	3	1	1	1	2	1	1	1	5	6		10	8	10	3	20	75	25	15	80	2	1
143065134878724	1	0.2552656	0	1	30	2	2	1	3	1	9	2	2	1	1	20
143065136336938	1	0.4682252	0	2	32	2	1	3	3		9	2		1	1	24	8	8	8	8	8	8
143065136770102	1	0.5801722	0	2	35	2	2	3	2	3	4	2	1	1	1	12	5	5	5	5	5	5
143065136917562	1	1.5525967	0	2	35	2	2	2	2	3	7	1	1	1	2	24	8	4	7	3	6	8	1	1	70		10	2
143065138288732	1	0.9991903	0	2	45	3	2	3	3		4	3	1	1	2	22	10	4	10	5	10	10	2	10	85	90	50	2	3
143065138640994	1	3.0530575	1	1	37	2	2	1	1	3	2	1	1	1	2	7							60	70	80	80	80	2	3
143065138863207	1	1.6838767	1	1	37	2	2	1	5	1	12	2	1	1	1	20	9	8	9	7	9	8	20	50	50	65	70	3	3
143065138921587	1	0.9901241	1	1	21	1	2	3	1		2	2	1	1	2	22	7	9	7	8	7	8	30	40	40	70	70	2	2
143065139215387	1	0.3236238	1	2	78	6	2	3	1	3	9	2	2	1	1	12	7	7	8	7	8	7	10	5	40	25	1	3	3
143065140323398	1	0.7457877	1	2	28	1	2	3	3	3	9	3	1	1	2	16	5	4	4	5	6		1	2	40	50	50	3	3
143065141501033	1	0.2	1	2	21	1	1	1	2	1	3	2	1	1	1	6	0	8	8	8	9	0					50
143065142544391	1	0.5159917	0	2	76	6	2	3	1	3	7	2	2	1	1	10	5	5	9	5	9	6		5	10		20	3
143065143664722	1	1.0174366	1	2	21	1	1	3	1	1	10	2	1	1	1	12	5	9	5	9	10	5	2	5	10	10	20	3	3
143065143807060	1	0.7433184	1	1	53	4	2	3	2		9	2	2	1	1	24				9	9						1
143065145333768	1	1.1648394	1	2	21	1	1	3	1	3	8	2	1	1	1	12	7	4	9	7	7	7	1	2	70	60	65	2	2
143065145416737	1	1.2418512	1	2	19	7	2	3	1		11	1	1	1	1	12	3	6	7	5	5	3	1	1	25	50	35	3	4
143065145452587	1	2.2519511	0	1	36	2	2	1	2	1	4	1	1	1	2	5	10	7	10	9	10	10	100
143065145466926	1	0.9735626	0	1	29	1	2	3	5	3	1	2	1	1	1	6	7	7	6	7	8	5	5	3	50	60	40	3	3
143065145710694	1	0.2710843	1	1	34	2	2	3	4	1	8	1	2	1	1	12	5	6	10	8	9	6	1	1	10	50	50	3	3
143065145799791	1	1.3428818	1	2	21	1	2	3	1		1	1	1	1	1	21	8	9	8	4	7	2	2	3	40	60	3	4	3
143065145941018	1	1.0467809	1	1	20	1	2	3	1	2	9	1	2	1	2	9	5	6	7	8	7		10	8	20	10	50	3	3
143065146000429	1	1.1927191	0	2	19	7	1	3	1	3	9	1	1	1	1	4	7	6		5	0						20
143065146297436	1	0.5863817	1	2	64	5	2	3	1	2	7	1	1	1	2	5	2	9	10	8	9	3	2	2	10	35	35	2	2
143065146325090	1	0.5160878	0	2	33	2	2	3	2		7	2	1	1	1	12	9	1	8	3	7	8	1	5	50	50	50	3	3
143065146462208	1	0.8534201	0	2	52	4	2	2	2	2	5	2	1	1	1	10	8	10	9	9	5	8	1	2	70	60	70	3	3
143065146638382	1	0.6149951	0	1	35	2	2	3	2	3	3	2	2	1	2	8	9	5	10	5	9		2	5	80	90	70	2	2
143065146665014	1	1.1738344	0	2	32	2	1	1	5	1	3	2	1	1	1	2	1	3	7	5	8	5	2	3	25	30	60	3	3
143065146716224	1	0.3753197	1	1	70	6	2	2	1	2	9	2	2	1	1	12	10	8	10	9	10	7	1	2	50			3
143065146907749	1	0.3945125	0	2	25	1	2	3	2		12	2		1	1	5	9	9	9	10	10	9					63
143065146983543	1	0.8359896	0	1	66	5	2	1	1	3	4	2	1	1	1	6	8	7	9	7	9	6
143065146987640	1	4.1799941	0	1	35	2	2	1	2	1	1	1	1	1	1	11	6	6	9	9	9	9	70	80	80	80	90	5	3
143065148388475	1	3.0270732	1	1	40	3	2	1	1	1	5	2	1	1	1	8	5	8	9	6	10	10	1	2	0	60	80	3	3
143065149278299	1	1.2418512	1	2	18	7	1	3	1	3	11	1	1	1	1	9	4	6	6	5	5	4	40	45	45	40	30	2	2
143065149662234	1	0.6894101	1	1	31	2	1	3	5	1	1	2	1	1	1	12	2	8	10	7	9	2	1	5	20	50	50	2	2
143065150990432	1	0.4869964	0	1	33	2	2	3	4	3	2	3	2	1	1	10	6	5	8	5	8
143065151252510	1	1.507181	0	2	30	2	2	1	2	1	5	2	2	1	2	32	9	8	6	6	6		50	50
143065151282216	1	0.2332933	0	1	24	1	2	2	2	3	5	3	2	1	2	4	8	8	10	7	10	6		20
143065151545428	1	4.2015878	1	1	34	2	2	1	1	1	1	1	1	1	1	10	8	9	10	8	10	6	80	90	90	80	80	3	2
143065152437370	1	0.6035535	1	1	32	2	2	3	3	3	2	1	1	1	1	8	8	5	10	6	9	3	8	35	75	50	80	3	4
143065152792649	1	0.4914141	1	1	48	3	1	2	1		12	2	1	1	2	12	8	6	8	6	8		2	3	80	70	60	3	3
143065157383236	1	0.947385	0	2	55	4	1	1	2	3	2	2	1	1	1	4	4	6	6	2	6	1		3	4	60	22	3	3
143065160630354	1	0.7759619	1	2	58	4	2	2	2	2	9	2	1	1	1	8	5	8	9	8	8	6			40			3
143065161335834	1	1.0524355	1	2	20	1	1	3	1		9	1	1	1	1	12	4	8	6	4	6		1	2	5	60	40	2	4
143065161590814	1	1.3383046	0	1	22	1	1	2	2	1	12	2	1	1	2	16	8	7	9	8	9	4	3	5	75	33	60	3	3
143065161627684	1	1.237957	1	1	30	2	2	1	5	1	8	1	2	1	1	20		5	10	7	8						60
143065162743857	1	0.5776832	1	2	23	1	2	3	2	1	5	2	1	1	1	8	9	8	10	8	9	8	50	75	75	20	30	2	2
143065163647009	1	0.6206165	1	1	23	1	2	3	2	3	7	2	1	1	1	26	5	7	6	7	6	4	15	15	40	60	40	3	3
143065166138380	1	2.2300041	0	1	25	1	2	1	5	1	7	3		1	2	22	3
143065166138381	1	0.9901241	1	1	20	1	2	2	1	1	2	2	1	1	2	12	9	8	9	8	8	8	10	10	70	70	50	3	4
143065166988397	1	1.1173644	0	1	44	3	2	3	3	3	2	2	1	1	2	8	2	6	5	7	5	2	25	15	0	50	5	2	2
143065167509595	1	0.2009808	1	2	19	7	1	3	2	3	9	2	1	1	2	8	8	8	10	9	10	7	2	5	70		40	3
143065167543411	1	1.8106259	0	1	67	5	2	1	1	3	5	2	2	1	1	8	10	10	10	10	10	10
143065168181251	1	1.3428818	0	2	22	1	2	2	1	1	1	2	2	1	1	14	6	8	8	9	8	5	1	5	40	70	15	2	2
143065169125378	1	0.6349599	1	1	38	2	2	3	2	3	12	2	1	1	1	12	8	7	8	8	9	6	1	5	75	85	90	2	2
143065169946631	1	0.6507461	0	1	58	4	1	3	2	2	9	2	1	1	1	8	8	7	8	6	9	8			50		30	3
143065170605158	1	0.4526406	1	1	53	4	1	3	4	1	3	2	1	1	1	52	5	5	5	5	5	5	99	99
143065171145850	1	1.1278502	1	1	56	4	2	1	3	3	2	1	2	1	1	32	8	9	10	6	10	7	2	10	5	80	40	3	3
143065172206660	1	1.1557307	1	1	58	4	2	1	2	1	4	2	1	1	1	4	1	5	4	7	10	2
143065173391388	1	2.7484737	1	2	38	2	2	1	5	1	13	2	1	1	1	12	2	8	5	5	8	3	1	12	1	80	19	2	2
143065173423145	1	0.6190516	0	1	40	3	2	3	2	3	11	2	1	1	2	4	8	5	8	3	8	6			50	50	70	3	4
143065173824600	1	0.4488091	1	2	43	3	2	3	2	3	9	1	1	1	1	16	10	7	10	7	8	5	10	10	20	50	40	3	3
143065174295643	1	0.4199295	0	2	24	1	2	3	2		8	2	2	1	2	18	3	4	6	2	1	4	1	2	25	10	5	3	2
143065174752345	1	0.4810159	1	1	22	1	2	2	2	3	1	1	1	1	2	12	2	7	4	7	5	4	20	10	10	60	25	2	3
143065175323668	1	1.7075233	1	1	45	3	2	1	5	3	13	2	1	1	1	12	7	9	8	6	8		15	10	30	60	70	3	3
143065175531520	1	1.2139661	1	1	61	5	2	1	1	1	1	1	1	1	1	16	5	10	9	6	10	5
143065175711869	1	0.464137	1	2	26	1	2	3	2	3	10	2	2	1	1	8	7	5	9	5	7	7	2	3	70	80	60	2	2
143065176207421	1	0.6137892	0	1	42	3	2	3	3		10	1	1	1	2	4	3	5	9	5	7	5	4
143065177377812	1	0.3288167	1	2	22	1	1	3	5	1	12	2	1	1	2	6	1	1	4	5	3		1	1	4	2	20	3	3
143065178867749	1	0.4541219	0	1	33	2	2	3	3	3	2	2	1	1	1	6	8	8	9	7	9	5	2	2	20	50	60	3	3
143065178869802	1	0.3792045	1	2	46	3	2	3	2	1	3	2	1	1	1	8	8	8	9	7	10	6	20	3	60	50	40	3	2
143065179400245	1	0.6029106	0	1	32	2	2	3	2	3	13	2	1	1	1	10	7		8		8						60
143065180515355	1	0.4602167	0	1	56	4	1	3	5		1	2	2	1	1	10	2	5	5	3	7	6	5	12
143065180812409	1	0.4682252	0	2	26	1	2	3	2	1	9	2	1	1	1	24	10	4	10	5	8	10	1	8	100	90	80	1	1
143065180939292	1	0.7106096	0	1	35	2	2	3	2	1	2	2	1	1	1	10	8	5	10	4	8	2	1	10	2		50	3
143065180951594	1	0.4801813	0	1	22	1	1	3	5	1	8	1	1	1	1	16	5
143065180981329	1	0.5663518	1	2	64	5	2	3	1	3	8	1	1	1	2	16	7	9	9	8	9	8	2	2	50	80	60	3	2
143065180992600	1	0.9373367	1	1	32	2	2	3	3	1	11	2	1	1	1	11	8	7	9	7	10	8		30	60			3
143065181021194	1	0.5573606	1	1	40	3	2	3	4	1	1	2	1	1	1	16	8	7	10	9	10	1	2	1	50	25	80	3	2
143065181030424	1	4.346089	1	2	19	7	2	1	2	3	11	2	2	1	1	8	8	8	9	9	6	6	40	65	50	20	25	3	2
143065181032479	1	1.1452562	0	1	22	1	2	2	1	1	9	1	1	1	1	24	3	4	9	4	5	7		1	70			3
143065181081709	1	0.3556974	0	1	65	5	1	3	1	1	8	2	1	1	1	12	5	5	10	5	7	8		20	50	75	60	3	3
143065181116450	1	0.4501939	1	2	42	3	1	3	2	3	9	2	1	1	1	16	6	6	8	7	9	8		1	10	50	70	3	3
143065181117481	1	0.7235478	1	1	36	2	2	3	3	3	10	2	1	1	1	6	8	6	7	8	7	10	3	5	50	0	45	2	2
143065181120565	1	1.5659612	1	2	44	3	2	3	4	3	8	2	1	1	1	25	3	3	8	1	5	5	1	2	20	50	20	2	3
143065181123647	1	3.766624	1	1	50	4	2	1	1	1	11	2	2	1	2	20	5				10	8	1	1			35
143065181124676	1	0.5464693	0	1	35	2	2	3	5	1	10	1	1	1	1	12	5	6	9	3	8	6	10	20
143065181126731	1	1.3120438	0	1	25	1	2	1	5	3	10	2	1	1	2	20	10	10	10	10	10	10	3	10	50	20	80	4	5
143065181128791	1	0.7516649	0	1	31	2	2	2	2	3	2	2	1	1	1	16	8	7	9	7	9	7	6	8	20	15	45	3	3
143065181151255	1	1.5855857	1	2	20	1	1	1	1	3	2	1	1	1	2	12	10	3	10	3	9	7
143065181154342	1	0.8027547	1	2	37	2	2	1	2	3	3	2	1	1	2	5	4	6	7	7	7		2	2	5	25	15	3	3
143065181169761	1	1.0524355	1	2	19	7	1	2	1		9	1	1	1	1	4			8		5						1
143065181190166	1	0.3158824	1	2	77	6	1	3	1	3	4	2	1	1	1	8	4	8	8	6	9	7	3	70	20	20	20	4	2
143065181190168	1	0.2950687	0	2	71	6	2	3	1	3	1	3	2	1	1	24	7	9	10	8	10	7	10	60	60	50	65	3	3
143065181197367	1	0.4895187	1	1	36	2	2	3	2	3	4	2	2	1	1	8	7	7	9	7	9	6	5	15	15	15	40	3	4
143065181205597	1	0.4569807	1	2	30	2	1	3	2	3	5	1	1	1	2	8	3	8	7	5	8	5		10		50	40		3
143065181207655	1	0.7026041	0	2	19	7	2	3	5	1	1	2	2	1	2	6	6	0	8	0	9	5	80	50	50	28	35	2	2
143065181219878	1	0.513739	0	2	20	1	2	3	5	3	1	1	1	1	2	6	5	2	7	2	8	2	1	3	10	7	70	2	4
143081854718983	1	0.790041	1	2	55	4	2	3	2	3	7	2	1	1	2	8	5	5	8	5	7	5	3	5	50	50	60	3	3
143081854865417	1	4.0769576	1	2	45	3	2	1	2	3	13	2	1	1	2	8	5	8	8	8	8	8	1	1	70	40	5	2	2
143081854903308	1	0.7640736	0	1	36	2	2	2	3	2	9	1	1	1	2	6	5	4	8	5	7	7	1	5	20	50	15	2	3
143081854991378	1	0.5919192	1	2	36	2	1	2	3	3	9	1	1	1	2	8	9	7	10	7	8		2	5	75	80	40	3	3
143081855042579	1	0.9613964	0	2	43	3	2	2	2	2	2	1	1	1	1	16	3	5	8	5	7	3	2	2	60	50	60	3	3
143081855159325	1	2.140348	1	2	60	5	2	1	1	1	8	3	2	1	1	16	5	5	8	7	8		5	2	50	65	60	4	3
143081855235106	1	1.8136868	1	2	55	4	2	1	2	1	9	1	2	1	1	21	0	5	7	5	8	5			5			3
143081855332390	1	0.7637515	1	2	46	3	1	3	2	3	11	1	2	1	2	9	3	7	10	6	8	2	1	2	10	20	40	2	3
143081855333417	1	1.408607	0	2	45	3	2	2	2	3	9	2	1	1	1	28	8	4	8	5	5	5	1	10	80	90	80	2	2
143081855442992	1	0.3393265	0	2	75	6	2	2	1	2	11	2	2	1	2	4	5	5	6	5	6	5	1	2
143081855552563	1	0.5080109	1	2	78	6	2	2	1		9	3	2	1	1	10	6	6	10	6	8	5	5	8	50	60	40	3	4
143081855552564	1	0.4876151	1	2	74	6	2	3	1	2	9	2	2	1	2	12	7	7	10	7	10	5	1	3
143081855609910	1	0.598333	0	2	46	3	2	3	2	3	9	2	1	1	1	8
143081855610935	1	0.9430022	0	2	60	5	2	3	2	3	13	2	1	1	1	8	1		6	3	6	5
143081855710269	1	0.9245138	1	1	47	3	2	2	3	2	9	2	2	1	1	8	8	5	7	5	7	7	1	4	50	40	15	3	2
143081855713342	1	0.7837254	1	2	40	3	1	3	3	3	9	2	1	1	2	10	6	6	9	5	9	3	0	1	40	30	10	2	2
143081855945804	1	0.6738456	0	1	52	4	1	2	2	2	2	2	1	1	2	8	7	4	8	2	7	9	1	2	10	30	60	3	3
143081856036943	1	1.452343	0	1	47	3	1	1	1	1	11	2	1	1	1	12	10	7	10	6	9	7		10	90		80	5
143081856037968	1	0.824675	1	2	41	3	2	2	3	3	7	2	1	1	2	8	1	6	9	7	9		1	2	10	10	80	1	2
143081856125012	1	0.9948247	0	2	56	4	2	1	2	3	12	1	1	1	1	28	4	7	10	9	10	2	1	2	20	70	60	3	2
143081856125013	1	1.5369047	0	2	64	5	2	1	4		13	1	1	1	1	8	0	4	10	5	10	0		5			1
143081856260193	1	1.0960864	1	1	49	3	2	3	3		1	2	1	1	2	14	8	6	9	6	9	5	10	8	10	50	30	3	4
143081856863345	1	0.5725516	1	2	74	6	2	3	1	2	9	1	1	1	1	7	3	7	8	2	7	2		4	5	30	5	3	3
143081857086586	1	0.4009736	0	2	66	5	2	3	1	1	10	1	1	1	1	8	5	8	10	8	10	5	1	2	50	20	80	1	1
143081857702928	1	1.001152	0	1	33	2	2	2	2	2	11	1	1	1	2	4	2	6	8	6	8	4	1	3	10	20	50	3	3
143081857873946	1	0.5603992	0	1	47	3	1	3	3	3	8	2	1	1	2	18	5	5	9	6	8		2	3	1	18	20	3	3
143081857873947	1	0.3236238	0	2	75	6	2	2	1	2	9	1	1	1	2	8	6	10	10	10	10		1	1	10	30	10	4	4
143081857945632	1	0.6477377	0	2	58	4	2	3	3	3	13	2	2	1	2	14	5	9	10	8	10	7		60	70	40	40	2	3
143081858002989	1	0.8925192	1	1	48	3	1	2	5	2	9	1	1	1	1	24	7	7	10	6	10	4	1	6	10	25	50	3	3
143081858041908	1	0.7837254	0	2	48	3	2	2	2	3	9	2	1	1	1	12	7	8	7	8	9	3	1		20	50	40	3	3
143081858046006	1	0.3527756	0	1	76	6	1	2	1	2	8	2	1	1	1	4	1	3	5	1	5	5		5	10		20	3
143081858084927	1	0.3914189	0	1	50	4	2	2	5		11	2	1	1	1	12	5	5	8	5	8	0
143081858120773	1	0.741528	0	1	53	4	2	3	2	3	7	2	2	2	1	12	8	8	9	8	8		1	5
143081858135113	1	0.2665946	0	1	29	1	1	3	2	1	8	2	1	1	1	16	7	5	8	5	8	5	10	20	50	50	70	3	3
143081858156627	1	1.580235	0	2	55	4	1	1	1	1	9	3	1	1	1	1	4	6	5	5	7
143081858165848	1	1.4769548	1	2	49	3	2	3	3	3	11	2	2	2	2	8	3	5	9	5	7		1	2	30	40	10	3	4
143081858182234	1	0.523808	1	2	66	5	2	3	1	2	13	2	1	1	1	16	6	6	9	5	10			5			6
143081858182235	1	0.7403928	0	2	34	2	2	2	2		13	1	1	1	1	7	4	6	10	7	8	4	30	35	35	20	40	3	2
143081858232427	1	1.1007727	0	1	69	5	2	3	1	1	12	2	2	1	2	24	8	9	10	7	10	8	3	40	5	50	60	3	3
143081858273394	1	0.6280176	1	1	39	2	2	3	2	1	13	3	1	1	1	12	10	9	8	10	8		5		30		50	5
143081858275443	1	2.4959278	0	2	45	3	1	1	2	3	9	1	1	1	1	12	10	10	10	10	10	10
143081858276470	1	1.2599695	0	1	33	2	2	2	2	2	13	1	1	1	2	8	4	4	8	3	6	2	2	3	20	70	70	2	3
143081858373636	1	3.0222579	1	2	51	4	2	1	2	3	7	2	1	1	1	24	6	8	9	5	7	7		2	70	40	70	2	3
143081858415627	1	0.2565937	0	1	69	5	2	2	1		11	3	1	1	2	12	7	4	9	4	9			3
143081858452497	1	1.8136868	0	2	55	4	1	1	2	3	9	1	1	1	2	6	3	6	8	6	8	5
143081858459668	1	1.5453775	1	1	75	6	1	1	1	3	9	3	2	1	1	8	9	8	8	8	10	6	50	80	20	80	80	2	3
143081858470936	1	0.3703948	0	2	46	3	2	3	2	3	2	3	2	1	1	16				7			1
143081858470937	1	2.8496237	0	2	52	4	1	1	2	1	9	2	1	1	1	12	6	6	8	9	9	9	50	50
143081858485276	1	0.9486398	0	2	62	5	2	3	2	2	8	2	2	1	1	12	5	5	7	5	8	5			70	60	60	2	3
143081858520093	1	0.6541164	1	2	42	3	2	2	5	3	2	2	1	1	1	8	7	8	9	6	9	3	4	70	5	40	30	2	2
143081858571303	1	1.147679	0	1	61	5	2	2	3	2	8	1	1	1	1	4	2	8	10	5	9	3		10	5			3
143081858584618	1	0.6623639	1	1	49	3	2	3	3	2	2	2	1	1	1	14		8	10	8	10		4	8	60	90	80	3	3
143081858792500	1	0.3043506	0	2	70	6	2	2	1	3	2	2	2	1	1	26	4	7	9	7	9	6				40	30		3
143081858793526	1	0.7997025	0	2	49	3	2	3	2	3	2	2	1	1	1	12	10	1	3	6	9	6	1	3	50	50	60	3	3
143081858810936	1	0.3575169	0	2	46	3	2	3	1	3	11	2	2	1	1	6	8	5	10	7	6	5	1	1	50	60	80	2	4
143081858822203	1	0.9709973	1	1	46	3	2	2	2	3	11	1	2	1	1	8	6	7	9	5	8	5	1	2	50	8	30	2	4
143081859004490	1	0.9351761	1	2	48	3	2	3	3	3	11	1	1	1	1	6	8	8	10	9	10	9			50	80		3	2
143081859007563	1	0.8977553	0	2	50	4	2	2	2	3	8	2	1	1	1	6	6	6	7	6	7	2		3	15	20	15	2	3
143081859070033	1	0.3900466	1	1	61	5	1	3	1	1	2	3	2	1	1	6	8	8	9	8	10	6			70	50	80	3	3
143081859158102	1	0.4940303	0	2	48	3	2	3	2	3	2	2	1	1	1	28	1	3	10	3	10	1	2	5	1	5	1	1	1
143081859195994	1	0.3301965	0	2	80	6	2	3	1	3	4	2	1	1	1	5	5	8	9	6	10	5		3	50	80	40	3	3
143081859297394	1	0.3200374	1	1	71	6	1	2	1	3	9	2	1	1	1	7	7	6	8	7	9	7	3	6	50	65	60	3	3
143081859341438	1	1.3152993	0	2	46	3	1	3	3	3	7	1	1	1	2	8	4	5	10	3	9	7		2	20	50	70	3	4
143081859356676	1	1.2856498	0	2	58	4	2	1	1		13	2	1	1	2	9	5	5	10	8	10	9	10	30	50	60	70	3	2
143081859426317	1	0.7628533	0	1	45	3	1	3	2	1	13	2	1	1	1	11	2	8	9	7	10	2	10	20	0	50	20	1	1
143081859438613	1	0.4700355	1	2	57	4	2	3	2	3	8	2	1	1	2	12	1		9		5	1		7	1			3
143081859492888	1	0.8949287	0	2	35	2	2	2	2	2	9	2	1	1	1	12	8	4	10	4	10	5	2	10	70	70	70	3	3
143081859590185	1	0.7566081	1	2	49	3	2	3	1	3	11	3	2	1	2	20	2		9	7	10	1					60
143081859595308	1	1.7229549	1	2	62	5	1	1	1	1	2	2	1	1	1	26	7	8	10	9	9	8	10	30	40	40	70	2	2
143081859682366	1	0.5748111	1	2	73	6	2	3	1	2	9	2	1	1	1	5	8	7	9	6	8	5		3		30	50		4
143081859686464	1	4.9763041	1	2	37	2	2	1	1	1	8	2	1	1	1	12	9	9	8	8	8	8	50	60	55	65	50	2	2
143081859856468	1	0.88632	0	1	20	1	2	2	2	3	2	1	1	1	2	6	6	7	7	3	6	5	1	3	50	70	40	3	3
143081860241515	1	0.62578	1	1	45	3	1	2	2	1	2	1	1	1	2	11	10	9	8	10	10	8
143081860278392	1	1.0257808	1	2	25	1	2	2	2	3	7	1	2	2	2	12	7	8	8	9	7		70	70	89	80	90	2	1
143081860305920	1	0.6104398	1	1	25	1	2	3	2	3	11	2	1	1	1	12	6	6	10	6	8	6
143081860315141	1	0.5409005	1	1	62	5	1	3	2	1	8	2	2	1	1	8	8	7	7	7	9	7				50			3
143081860333584	1	0.2243478	0	1	23	1	1	2	2	3	7	2	1	1	2	12	7	9	10	8	10	1	50	50	1	50	80	1	3
143081860343831	1	0.2781786	1	1	47	3	2	3	2	3	11	3	1	1	2	50	9	7	10	6	9	9	1	3	95	75	75	2	2
143081860348952	1	0.594073	0	2	39	2	1	3	2	1	8	2	1	1	1	8	6	2	7	3	7	3	1	4	20	70	30	2	2
143081860368421	1	0.8542397	0	1	33	2	1	2	5	3	7	1	2	2	2	8	2	8	9	8	9		1	3	25	70	85	2	3
143081860421681	1	0.3038391	0	1	76	6	1	2	1		13	2	2	1	1	10	5	8	10	8	10	2
143081860455480	1	0.5326603	0	2	78	6	2	2	1	2	11	2	1	1	1	18	6		10	10	10		6	3	50	60	70	4	3
143081860481090	1	1.2777813	1	1	33	2	2	2	2	1	13	1	1	1	2	6	4	8	8	7	8	5	1	2	60	30	60	3	3
143081860491331	1	0.500828	0	2	68	5	2	3	1	3	1	2	2	1	1	16	5	5	9	7	7	5		3	50	50	40	3	3
143081860522057	1	1.5829536	1	2	58	4	2	1	2	3	7	1	1	1	1	20		9		1	10	8					30
143081860558936	1	1.0839691	1	2	63	5	2	3	2	2	9	2	1	1	1	12	6	7	9	7	9		2	5	50	50	35	3	3
143081860590685	1	0.7373235	0	1	39	2	1	2	2	1	2	1	1	1	2	16	6	8	10	5	8	5	30	40	50	80	50	2	2
143081860650102	1	0.5980754	1	1	46	3	2	3	2	3	8	2	1	1	1	10	9	8	9	8	10	7
143081860731912	1	0.7609271	0	2	32	2	2	3	3	2	11	1	1	1	2	8	9	8	9	6	4	10	15	2	90	100	90	2	1
143081860768787	1	0.6063353	1	2	45	3	2	3	3	3	7	2	1	1	2	12	10	3	10	3	10	4	2	5	49	49	50	3	3
143081860829230	1	0.7652593	0	1	70	6	1	3	2	2	9	2	1	1	1	4	2	3	8	7	8	5		5	50		30	3
143081860866104	1	0.5956365	0	1	75	6	2	3	1	3	9	3	1	1	2	7	9	9	10	8	10	9	80	50	60	90	10	3	4
143081861002324	1	0.6310416	1	1	53	4	1	3	2	1	11	3	2	1	2	6	10	6	10	7	10	5		5	50	60	20	3	3
143081861170182	1	1.0686956	1	2	45	3	2	1	2	3	2	1	1	1	1	4	0		5		5			1
143081861229594	1	0.8419283	0	2	72	6	2	1	1	2	11	2	1	1	1	12	5	8	8	8	8	5	1	2	50	40	50	3	4
143081861242909	1	0.7180957	1	2	31	2	2	3	3	3	13	2	1	1	1	18	8	8	9	7	9	7	1	5	70	80	50	3	3
143081861365819	1	0.5556544	1	2	78	6	2	3	1	2	1	3	2	1	1	8	7	7	8	6	8	6	2	3	30	50	5	3	3
143081861370941	1	0.9042771	1	1	41	3	2	2	1	1	7	2	1	1	1	16	9	10	9	6	9	6	2	5	60	40	80	3	3
143081861382208	1	0.9453249	1	2	25	1	2	3	1		11	2	1	1	1	5	3		10		5				2	0		2	2
143081861401674	1	0.5570901	0	1	22	1	2	3	2		8	2	1	1	2	4	7		8		8	5
143081861591133	1	0.3306434	1	1	68	5	2	3	1	3	12	2	1	1	1	28	8	8	8	9	9	7
143081861687401	1	1.6467216	1	2	69	5	2	1	1	3	7	3	2	1	2	8	8	8	8	7	6	7	2	7	4		10	3
143081861825544	1	0.2833096	0	2	74	6	2	2	1	2	3	3	2	1	1	48	8	8	9	2	7	7	1	3	80	50	80	2	3
143081861976115	1	1.1591615	1	1	40	3	2	3	5	1	8	3	2	1	1	4	9	9	10	7	9	3	2	4	10	1	30	4	3
143081862070345	1	0.8697667	1	2	50	4	1	3	2	2	2	1	1	1	1	20	2	5	9	5	9	6	100	20	50	50	50	3	3
143081862157412	1	0.5757492	0	1	38	2	2	3	2		8	3	2	1	1	12	9	7		6	9	5				70	70		4
143081862209653	1	2.2768903	0	2	77	6	2	1	1	3	1	2	2	1	1	16	5	10	10	7	7	5	8	8	10	50	5	3	3
143081862215799	1	0.2505595	0	2	45	3	2	1	2	3	7	1	1	1	2	22	9	7	8	9	9	10	10	15	15	90	95	2	3
143081862388779	1	0.8365935	0	1	49	3	2	2	2		13	2	1	1	2	48	8	5	9	2	9	6	2	2	50	60	50	3	3
143081862435911	1	0.2922169	0	2	72	6	1	3	1	3	2	2	1	1	1	12	1	5	7	5	5	1	2	25	5	50	60	2	3
143081862560770	1	1.0119701	0	1	18	7	2	3	1	1	10	2	1	1	1	12	3	5	4	5	10	4	10	80	0	10	60	2	2
143081862746193	1	0.4384323	1	2	33	2	1	3	2	1	9	2	1	1	1	52	6	7	10	6	6	6	1	10	20		1	2
143081862746194	1	0.7339631	0	2	60	5	1	3	2	3	2	2	1	1	1	8	9	7	10	6	9	3	1	3	10	50	5	2	2
143081863603258	1	1.6468408	0	2	31	2	2	1	3	3	2	2	1	1	1	24	7	7	10	7	8		8	4	10	60	20	2	2
143081863646285	1	1.3896774	1	1	38	2	1	1	2	1	2	2	2	1	2	24	8	5	7	8	9	5
143081863647312	1	0.6133649	1	1	30	2	2	3	1	3	7	2	1	1	1	48	4	5	8	5	5	5	8	15	20	75	35	2	3
143081863665756	1	0.7311227	0	1	24	1	2	3	1	1	9	2	1	1	2	6	1	5	9	4	8		3	10	80	60	80	3	3
143081864325238	1	0.6979114	1	2	54	4	2	3	2		13	1	1	1	1	10	7	4	8	4	5	7	1	2	20	30	20	1	3
143081864377377	1	0.2607909	1	2	46	3	2	1	2		13	1	2	2	2	47	10	10	10	10	10
143081864546422	1	1.0878197	1	1	42	3	1	3	3	1	2	2	1	1	1	19	9	7	10	8	10	8	2	3	70	80	94	3	3
143081864744980	1	1.1885267	1	2	30	2	2	1	2	1	8	2	2	1	2	22	5	5	5	5	5	5	5	10	11	10	5	3	3
143081864795194	1	0.8539982	0	2	76	6	2	1	1	1	4	2	1	1	1	8	10	5	10	5	10	2		2	15	5	8	3	3
143081864982643	1	0.5265303	1	1	20	1	1	3	5		9	2	1	1	1	23	8	9	10	9	8	5	35	45	50	80	60	3	3
143081865218111	1	0.8827435	1	2	50	4	2	3	3	1	9	1	1	1	1	8	4	6	7	8	10	5	30	50	50	70	5	2	2
143081865224262	1	0.5823735	1	2	45	3	2	3	3	2	2	1	1	1	1	3	8	7	8	5	7	8					45
143081865495628	1	1.1055045	1	1	34	2	2	3	1	1	8	2	1	1	1	8	7	8	9	8	9	7	2	2			75
143081865745467	1	1.2826575	1	1	32	2	1	1	1	1	7	2		1	2	20	4	9	10	4	6		2	5
143081865764935	1	0.8424187	1	2	31	2	1	3	2	3	11	3	1	1	1	10	3	5	5	4	4		1	10	50	20	60	4	3
143081865890921	1	1.8627609	1	2	37	2	1	1	1	1	7	1	1	1	1	8	6	8	6	5	8	7	30	20	20	20	30	2	2
143081865895035	1	0.71538	0	1	30	2	2	2	5	1	9	2	1	1	2	8	6	3	6	3	6		1	5	10	20	85	3	3
143081865940034	1	0.6146986	1	2	35	2	2	3	2	3	2	2	1	1	1	28	4	6	8	6	8	4	6	8	35	75	75	3	2
143081865959523	1	0.6827471	1	1	34	2	1	3	5	1	2	2	2	1	1	6	0	5		5	10	0	30	70	0	60	30	1	4
143081865979935	1	1.1427565	0	2	49	3	2	1	5	1	8	2		1	1	12	7	7	9	8	8	7			50	75		3	3
143081865983019	1	1.4064339	0	1	30	2	1	3	5	3	8	1	1	1	2	6	4	5	10	5	8		2	15	35	70	40	2	2
143081865985074	1	0.3219165	0	2	65	5	2	3	1	2	1	2	2	1	1	3	5	6	7	4	7	2	2	4	10	40	30	2	3
143081865989186	1	0.3458699	1	2	75	6	1	3	1	3	12	2	2	1	1	7	2	5	4	5	5	6	1	3	5	30	10	2	3
143081865997412	1	1.2499676	1	1	19	7	2	3	1	1	7	2	1	1	2	26	9	5	10	6	8	8	2	5	50	25	20	3	2
143081866003458	1	2.5958959	1	2	33	2	2	1	2	1	9	1	1	1	1	23	5	6	5	6	8	5	0	1	50	70	60	1	3
143142247320641	1	0.5009935	1	2	44	3	2	3	2	3	3	1	1	1	1	4	1	7	8	5	5	3	2	2	68	100	85	3	2
143142247553116	1	0.5850233	1	1	51	4	1	3	2	2	10	2	2	1	1	6	10	7	10	4	8	1	4	9	10	9	12	2	2
143142247632998	1	0.320838	0	2	60	5	2	3	1	2	12	1	1	1	1	8	8	7	9	7	9		1	2	10	40	50	3	3
143142247806078	1	1.0493368	1	2	52	4	2	2	2	3	10	1	1	1	2	4	1	6	6	2	2	2	2	2	5	60	1	2	3
143142247996437	1	0.681825	0	1	40	3	2	3	2	2	10	3	2	1	1	8	6	9	10		8	5		20
143142248017944	1	0.2077093	0	2	55	4	2	3	2	2	12	2	1	1	2	16	7	7	10	7	10	5	5	10	20	30	40	2	2
143142248051740	1	0.7905896	0	1	59	4	2	2	3	2	7	2	1	1	2	8	2									70			4
143142248237107	1	0.5881835	0	2	61	5	2	3	2	2	10	2	2	1	1	6	5	7	9	7	6	6	2	1	50	30	50	3	3
143142248549466	1	0.6750372	1	2	54	4	2	3	3	2	12	1	1	1	1	8	5	3	10	3	8	1	1	5	10	20	20	3	3
143142248568926	1	0.4853812	1	1	55	4	2	3	1	1	12	2	1	1	1	8	8	7	8	7	8	7		6
143142249087010	1	0.4267761	1	1	53	4	2	2	2	2	3	3	2	1	2	52	10	4	10	4	10	7	1	4	50	80	80	1	1
143146186424326	1	0.7673748	1	2	46	3	1	3	2	2	13	1	1	1	1	8	8	3	10	3	10	2	1	2	20	20	50	3	3
143146186465288	1	0.7995266	1	2	64	5	2	3	1	2	12	2	1	1	1	8	7	5	9	7	9	4	3	5	1	3	5	2	3
143146186516490	1	3.1053056	1	2	60	5	2	1	1	1	8	3	2	1	1	4	5	5	5	8	7	5	8	2	60	50	30	5	5
143146186571789	1	0.6521951	0	2	54	4	2	2	2		2	2	2	1	1	4	2	4	9	3	7	2
143146186577935	1	1.3733901	0	1	65	5	1	2	2	2	9	2	1	1	1	10	6	8	6	8	8	4	10	5
143146186587153	1	0.4876151	1	2	74	6	2	3	1	3	9	2	1	1	1	8	8	8	10	8	8	9	1	4	30	50	50	4	3
143146186589202	1	0.4387489	1	2	49	3	1	1	2	3	4	2	2	2	1	8	2	7	5	7	10		1	2	10	7	60	2	3
143146186643482	1	0.7450834	0	1	50	4	1	2	2	3	9	2	2	1	2	20	10		10	8	10	2					6
143146186657822	1	0.3708494	0	2	34	2	1	3	2	3	2	1	2	1	2	20	4	4	4	4	7		25	50	0	50	50	2	2
143146186659871	1	2.6855621	1	2	72	6	2	1	1	2	11	2	2	1	1	16	4	5	8	5	8	4	8	6	5	15	60	3	3
143146186668065	1	0.8674992	1	2	45	3	1	2	2	2	10	1	1	1	1	8	4	8	8	1	3	1	1	3	10	50	20	1	1
143146186696743	1	0.8827381	1	2	36	2	2	3	4	3	3	1	1	1	1	9	8	3	8	2	7	5	1	18	20	80	64	2	2
143146186729521	1	0.7759619	1	2	59	4	1	2	2	2	9	2	1	1	2	10	9	7	8	7	9	7	1	2	30	50	60	3	3
143146186747960	1	0.6049004	1	2	56	4	2	2	1	3	1	2	1	1	1	6	6	9	10	8	7	2	1	2			50
143146186754105	1	0.8292977	0	2	53	4	2	2	4	3	7	2	2	1	2	52	5	9	9	10	10	2	30	50	30	98	45	3	1
143146186776636	1	0.8315088	0	1	38	2	1	3	2	3	5	1	1	1	2	12	0	8	10	10	6	2	40	10	13	30	50	1	1
143146186828869	1	3.4278283	1	1	70	6	2	1	1	1	9	2	1	1	1	9	10	9	10	9	10	9	20	50	80	80	75	2	2
143146186844232	1	2.0721026	1	1	60	5	2	1	2		1	3	2	1	1	8	3	8	8	8	10	2	5	5	10	10	35	2	3
143146186848330	1	0.805396	1	2	62	5	2	1	1	2	1	2	2	1	1	16	8	8	10	6	10				70	70	70	3	3
143146186865741	1	0.3841602	1	1	75	6	2	2	1		7	1	1	1	2	15	3	7	3	7	7	5		3			20
143146186890320	1	1.2720918	1	1	66	5	1	1	1	2	9	1	1	1	1	8	8	8	7	7	10	6	3	10	20	40	15	3	3
143146187023458	1	3.0546682	0	2	52	4	1	1	2		2	1	1	1	2	8	1	3	8	3	8	9			80	50	50	3	3
143146187050089	1	1.5980998	1	1	61	5	2	1	1	3	4	3	2	2	1	28	7	9	10	9	10		5	10	1	100	80	2	2
143146187071601	1	0.382384	1	1	44	3	2	2	1	1	5	1	1	1	1	52	10	6	4	6	10	5	0	2	10	0	50	3	1
143146187099252	1	1.3973992	1	1	34	2	2	1	5	1	1	2	1	1	1	6	8	8	8	7	10	9	2	12	50	40	30	2	3
143146187100277	1	0.3098306	0	2	67	5	2	3	1	3	5	2	2	1	1	25	10		10	10	10	8	4	3			20
143146187113591	1	0.5806386	1	2	70	6	2	3	1	2	11	1	1	1	1	24	5	3	8	4	9	4	1	10	15	30	1	3	3
143146187281531	1	0.4574092	1	1	64	5	2	2	1	3	7	1	1	1	1	17	1	6	10	5	10	1	0	1	1	2	2	3	3
143146187306111	1	1.0070656	1	2	58	4	2	3	2	1	7	2	1	1	1	12	8	8	10	8	8	5	6	10	50	60	70	4	4
143146187307008	1	0.7192444	0	2	34	2	1	2	3	3	9	1	1	1	1	24	0	0	8	3	4	0	5	1	1	50	75	1	1
143146187374593	1	0.4152606	1	2	62	5	2	2	1	2	9	2	2	1	2	16	8	7	10	6	7	3	1	3	20	50	60	3	2
143146187500555	1	0.3485785	0	1	73	6	2	2	1	3	11	2	1	1	1	22	8	8	9	8	10	8
143146187506701	1	0.4805149	1	2	77	6	2	2	1	2	2	2	1	1	2	8	9	6	9	6	9	8				50			4
143146187506702	1	2.1580306	1	1	70	6	2	1	1	3	12	2	2	1	1	14		9	10	10	10	2			10	50	50	2	4
143146187556880	1	0.5561067	1	1	33	2	1	3	2	1	7	2	1	1	1	12	7	8	8	8	6	4	20	10	50	40	50	3	3
143146187719699	1	3.8206821	0	2	69	5	2	1	1	3	10	2	2	1	1	20	7	7	9	5	8	5		10	20	60	20	2	3
143146187779094	1	0.8201823	1	2	49	3	2	2	3	2	9	2	1	1	1	24	8	6	8	7	6	5	5	5	50	50	60	3	3
143146187873308	1	1.5147014	1	1	63	5	2	1	1	2	8	2	1	1	2	8	3	7	7	7	7	5	10	10	4	30	15	2	2
143146187996195	1	2.3109193	1	1	72	6	2	1	1	3	4	3	2	1	1	16	5	3	7	4	9	4	2	11		50	60		3
143146188171308	1	0.4588486	1	1	54	4	2	3	2	1	8	3	1	1	2	8	10	7	10	8	10	7	1	25	25	25	50	4	4
143146188178478	1	1.9029207	0	2	66	5	2	1	1	3	1	2	1	1	1	26	7		9	5	9					40			4
143146188179503	1	0.53362	0	2	65	5	1	2	1	3	11	2	2	1	1	8	5	7	9	7	8	5	1	2	30	50	20	3	3
143146188184624	1	3.4247516	0	1	30	2	2	1	2	1	2	2	1	1	2	22	8	6	6	9	10	9	100	80	20	80	50	3	2
143146188281912	1	0.3332208	1	1	65	5	1	3	1	3	11	2	2	1	1	10	8	6	8	8	8			1	10	60	50	4	4
143146188284985	1	0.8488026	1	1	55	4	2	3	3	2	10	2	1	1	2	20	9	8	8	6	9	8	2	2	50	10	80	2	2
143146188292154	1	0.5399674	1	1	54	4	2	3	1	1	5	2	1	1	2	52	2	6	8	7	8	3	3	10	2	60	40	1	4
143146188295227	1	3.0098587	0	2	61	5	2	1	1	1	13	1	1	1	1	4	0	2	2	2	2	2	30	2	1	3	2	2	2
143146188298300	1	0.71538	0	1	34	2	2	3	2	2	9	2	1	1	2	12	9	8	9	5	9	8	3	30	80	75	80	3	3
143146188303422	1	0.2883675	1	1	62	5	2	3	1	3	8	2	1	1	1	8	9	7	10	6	8		6	10	25	20	50	3	3
143146188356678	1	0.9549846	1	2	28	1	2	3	4	1	2	2	1	1	1	9	4	8	9	6	8	2	10	30	20	50	50	2	1
143146188546128	1	1.6938272	1	2	44	3	2	1	2	3	11	2	1	1	2	8	7	8	8	7	8	6			50			3
143146188588113	1	2.8301137	1	1	71	6	2	1	1	3	3	2	1	1	2	52	7	6	7	6	10	6	15	40	50	50	60	3	3
143146188593234	1	1.0682936	1	1	29	1	2	3	2	1	8	2	1	1	1	7	8	6	8	8	7	8	2	20	60	70	70	3	4
143146188761180	1	0.3299774	1	2	66	5	2	2	1	3	13	2	1	1	2	20	9	6	10	5	7	6	3	10	40	30	60	3	3
143146188781666	1	1.0524355	1	2	24	1	2	2	1		9	3	1	1	1	11	5	4	5	4	6
143146188791908	1	2.8350533	0	1	25	1	1	1	4	1	11	3		1	1	14	0
143146188797029	1	0.8315211	0	1	36	2	2	3	2	3	13	1	1	1	1	8	6	6	8	6	8	4	10	15	50	80	40	3	3
143146188964982	1	1.0323598	1	1	37	2	2	3	5	3	4	2	1	1	1	9	6	7	7	4	4	2	1	1	20	50	90	3	2
143146189110280	1	0.9754128	0	1	40	3	2	3	2	1	9	3	1	1	2	24	8	6	9	5	9	8	2	50	80	80	80	2	2
143146189118476	1	1.3861716	0	2	46	3	2	2	2	2	7	2	1	1	1	4	0			5	5	5			100			1
143146189121549	1	1.7586582	0	1	48	3	1	1	1	1	13	3	2	1	1	8	7	8	9	7	8	7	60	80	50	80	70	3	3
143146189152278	1	0.966737	0	2	34	2	1	2	2	2	9	1	1	1	1	8	8	3	8	2	8	4	2	6	50	33	33	2	3
143146189177884	1	0.2516986	1	1	44	3	2	3	2	2	13	2	1	1	2	13	7	8	8	7	8	7
143146189186078	1	0.7157702	0	2	28	1	2	3	2	1	12	1	2	2	2	21	10	9	8	9	9		1	1	2	5	1	1	1
143146189673513	1	1.0160696	0	1	65	5	2	3	1	3	12	2	2	1	1	42	7	9	10	9	10		20	50	55	85	45	4	1
143146189795371	1	0.8625241	0	2	44	3	2	3	3		8	1	1	1	1	13	5	5	5	5	5	5	80	20	15	20	30	1	1
143146190079029	1	0.6364342	1	1	44	3	2	3	5		1	2	1	1	1	12	10	9	10	5	10	5
143146190448711	1	0.3284848	0	2	65	5	1	3	1	2	8	3	2	1	1	10	6	7	9	6	9	4		20	50	50	50	3	4
143146192890969	1	0.6602571	0	2	23	1	2	3	2	1	8	3	2	1	1	16	7	7	9	7	9	8			70		80	2
143146193472619	1	0.8992028	1	1	67	5	2	1	1		1	1	1	1	1	16	8	6	7	8	10	6
143146193810536	1	1.2610143	0	1	49	3	1	1	1	1	5	3	1	1	2	8	9	7	10	6	10	9	10	25	50	30	70	4	3
143146194480240	1	0.4693607	1	1	28	1	2	3	1	3	3	1	1	1	2	8	6	7	8	8	8	8				60			3
143146194591826	1	4.9591954	0	1	40	3	1	1	2	1	13	2	1	1	1	16	9	9	10	10	10	5	50	60	50	90	60	3	3
143146194617440	1	0.6810171	1	1	52	4	2	2	4	2	9	1	2	1	1	8	8	10	10	7	10	4	1	2	5	5	25	4	2
143146194633836	1	0.2148999	0	1	38	2	2	1	2	1	1	1	1	1	1	10	5	6	10	8	10	5	5	10	5	50	60	3	3
143146194642037	1	1.1537842	1	1	18	7	1	1	1	2	7	2		1	1	18	6	8	8	8	8	5	5	30	20	5	55	4	4
143146194650117	1	0.4720559	0	1	18	7	1	3	5	1	12	3	2	1	1	11	8	7	9	8	10	8	8	15	55		25	3
143148840742995	1	0.7295343	0	2	50	4	2	2	2	3	8	2	1	1	2	24	9	8	10	7	9	8	2	5	70	80	20	3	3
143148840885334	1	0.5734063	1	2	50	4	2	3	2	1	12	2		1	1	10	6	5	5	5	5	8	5	10	70		70	3
143148840974423	1	0.3422278	1	1	70	6	2	3	1	2	4	2	1	1	1	32	7	8	8	8	10	5	3	2	1	40	30	3	3
143148840981593	1	0.7304651	0	1	78	6	2	3	1	3	4	2	2	1	1	12	8	7	10	7	10	7	2	5	1	10	10	4	4
143148841014368	1	3.1404167	0	2	77	6	1	1	1	3	2	2	2	1	1	8	5	7	9	6	10	5	3	20	20	80	30	3	3
143148841049190	1	2.140348	1	2	55	4	2	1	1	1	8	2	1	1	1	22	6	9	9	9	8	6	8	10	5	90	5	2	2
143148841131127	1	0.4604478	1	1	76	6	2	2	1	2	13	1	1	1	2	12	3	8	10	6	7	2		2	10	40	40	3	4
143148841141368	1	0.5067603	1	2	72	6	2	3	1	2	1	2	1	1	1	12		10	10	8	10	3	2	4	2	1		3	2
143148841167872	1	0.6336115	0	2	75	6	1	3	1	3	8	3	2	1	1	7	10	8	10	6	10	9	1	2	80	70	70	4	3
143148841204742	1	0.3966913	0	1	72	6	1	3	1	3	11	2	1	1	2	10	6	6	8	4	8	7	3	8	10		40	2
143148841218056	1	0.8000476	1	2	51	4	2	3	4	3	13	3	2	1	2	8	5	6	6	6	6	2	1	1	1	50	30	2	4
143148841267221	1	0.9630855	1	1	56	4	2	1	2	2	10	2	1	1	2	8	7	7	8	6	7	9		2	50	60		3	3
143148841315355	1	0.3170809	0	2	80	6	2	2	1	2	2	2	1	1	2	6	6	9	9	9	9	5		6	30	50	1	4	4
143148841317404	1	0.5760724	1	1	54	4	1	3	1	1	9	2	2	1	1	16	5	5		5	7	7
143148841354272	1	0.5748111	1	2	65	5	1	3	1	3	9	2	2	1	1	6	3	8	8	5	5	2	1	2	5	40	2	2	3
143148841375780	1	0.4876151	1	2	65	5	2	2	1	2	9	2	1	1	1	10	10	6	10	6	9	5	3	50	30	60	10	3	3
143148841383973	1	0.3074107	1	2	79	6	2	2	1	2	1	2	2	1	2	8	6	6	8	7	9	8	5	10	10		1	2
143148841405479	1	1.3087191	0	2	56	4	1	1	5	1	13	1	1	1	1	48	5	5	8	7	5	5	1	1	5	50	10	3	3
143148841430068	1	0.3821586	1	1	68	5	1	2	1	2	7	2	2	1	1	8	7	8	9	7	8	3			30	50	30	3	3
143148841491519	1	1.3790411	0	2	73	6	2	1	1	3	9	3	2	1	1	8	3	7	5	3	8		0	2	50	30	50	3	2
143148841497664	1	0.5988541	1	2	80	6	2	3	1	2	9	2	2	1	1	12	5	5	8	7	10	5	2	5	20	20	5	3	3
143148841532482	1	0.4269825	0	2	77	6	2	2	1	2	2	1	1	1	1	28	6	7	9	7	8	3	1	1	5	50	3	3	4
143148841591880	1	1.2529685	0	1	70	6	2	3	1		11	2	2	1	1	16	10	10	10	5	10	8	1	2	5	20	50	3	4
143148841673815	1	1.8555732	0	2	69	5	2	1	1	3	9	2	1	1	1	12	5	5	5		5	5	1	1	1	50	25	3	3
143148841731162	1	1.2827882	1	1	38	2	1	1	2	1	7	2	1	1	1	4	8	10	10	10	10	10	5	5	50	80	15	3	3
143148841732187	1	0.7836384	0	2	56	4	1	1	2	3	9	2	1	1	1	6	7	2	9	2	8	5	1	50	50	50	80	3	3
143148841784416	1	0.5670899	0	2	75	6	1	3	1	3	4	3	2	1	1	8	9	8	9	9	9
143148841794659	1	1.0366178	0	2	70	6	1	1	1	3	11	3	1	1	1	12	9	7	10	8	9	8		5
143148841804902	1	0.2922393	0	1	70	6	1	2	1	2	2	2	1	1	1	0	5	7	9	7	8	5	1	2	60	30	75	3	3
143148841818221	1	4.3540124	0	1	77	6	1	1	1	3	5	1	1	1	1	8
143148841849969	1	1.5385695	0	1	45	3	2	1	1	1	1	2	1	1	1	24	6	6	6	6	6	6
143148841850994	1	0.3352249	0	2	75	6	2	2	1	2	9	2	1	1	1	8	8	5	10	5	5	5					30
143148841854067	1	0.3437744	1	2	76	6	2	2	1	2	5	2	1	1	1	27	8	9	10	6	9	8	2	4	75	60	30	3	3
143148841970805	1	0.64314	0	1	54	4	2	2	4	1	3	2	2	1	1	12	6	9	9	9	9	5	2	5	50	10	60	3	4
143148841980023	1	1.6176058	1	2	82	6	2	1	1	2	1	2	1	1	1	51	10	10	10	8	10
143148842076169	1	0.4374022	0	1	75	6	2	2	1		5	2	2	1	1	24	0	8	10	6	10	0			0			2
143148842082315	1	0.5493647	0	1	50	4	1	2	2	3	12	3		1	1	12	7	8	8	8	10	8	25	30	60	50	45	3	3
143148842092560	1	0.7413826	1	2	30	2	2	2	3	3	9	1	1	1	1	12	3	2	3	1	4	3	1	4	30	50	1	3	4
143148842157090	1	0.5971076	1	1	74	6	2	3	1		1	2	1	1	1	14	8	9	9	10	9	8
143148842180650	1	0.4359925	1	1	75	6	2	3	1		2	2	1	1	1	8	8	8	9	8	9
143148842210354	1	0.3593185	1	1	76	6	2	3	1	3	4	2	2	1	1	10	9	8	10	6	10	7	5	10	50	50	50	3	3
143148842227766	1	1.5131953	1	1	40	3	2	1	1	1	9	2	2	1	2	52	10	10	10	7	10	5	30	60	95	95	99	3	3
143148842268735	1	3.1151696	1	2	48	3	1	1	2	3	9	2	1	1	2	6	5	6	8	7	10		1	5	1	60	60	2	2
143148842273857	1	0.4884061	1	2	46	3	2	3	2	1	8	2	2	1	1	14	9	9	8	9	9	6	20	15	50	80	89	2	2
143148842304588	1	0.5173964	1	2	73	6	2	2	1	3	7	2	2	1	1	16	5	5	7	3	8	6	1	2	40	20	20	4	4
143148842324049	1	0.5670899	1	2	84	6	2	2	1	2	4	2	2	1	1	12	7	6	10	3	10	9	30	1	10	5	1	3	3
143148842338389	1	0.4779332	1	1	76	6	2	3	1	3	2	2	1	1	1	8	8		10	9	10	4				60			3
143148842351706	1	2.9446535	0	1	65	5	2	1	1		10	2	2	1	1	12	9	10	10	10	9	9	2	2	2		40	3
143148842403938	1	1.0194565	1	1	74	6	1	1	1	3	3	2	2	1	1	6	7	10	10	10	10	10		50	50			3
143148842409062	1	0.9418421	0	2	33	2	2	3	2	2	9	3	2	1	2	12	10	7	9	7	9			3	50	50		3	4
143148842454126	1	0.3340947	0	1	75	6	1	3	1	2	3	2	1	1	2	18	8	6	8	7	10	8			20			4
143148842488950	1	0.5529531	1	1	75	6	1	2	1	3	11	2	2	1	2	24	5	7	10	7	10	5	8	10	50	50	50	3	3
143148842508411	1	0.3889843	0	2	74	6	2	3	1	3	13	2	1	1	1	6	8	9	10	8	10	8		3	50			3
143148842520701	1	1.4654491	0	1	83	6	2	1	1	3	5	2	2	1	1	12	10	10	10	10	10	9
143148842520703	1	0.4805149	1	2	77	6	2	3	1	2	2	2	2	1	1	4	6	7	7	7	9		4	2	30	30		3	4
143148842530820	1	1.1099312	0	2	48	3	2	2	3	3	7	2	1	1	1	12	5	7	2	5	8	4		2	15			3
143148842566667	1	1.0313847	0	1	42	3	2	2	2		2	2	1	1	1	6	10	8	10	5	10	5	1	3	50	50		4	3
143148842584078	1	0.3651204	0	2	75	6	2	3	1	3	11	1	1	1	1	4	3	9	10	10	9	3	3	5	40	70	60	3	3
143148842588176	1	2.9762773	1	1	78	6	1	1	1	1	13	2	1	1	1	8	7	7	3	6	9	8		10	10	5	30	3	2
143148842592273	1	0.3013103	0	1	62	5	2	3	1		5	2	1	1	1	12	2	5		5	2			2	2			3
143148842596370	1	0.730345	1	1	83	6	2	3	1	3	1	2	1	1	1	10	4	8	10	8	10	3	3	10	25	70	45	3	3
143148842611734	1	1.1621177	0	1	33	2	2	3	2		2	1	1	1	1	3	3	4	7	4	5	5	1	3			60
143148842629145	1	0.6977279	1	2	41	3	2	3	2	1	13	2	1	1	1	21	9	8	8	9	10	7	40	10	60	20	60	2	2
143148842656799	1	1.7698121	1	1	68	5	2	1	1	3	11	3	1	1	2	3	10	9	10	9	7	5
143148842657824	1	0.8396556	1	1	53	4	1	3	2	2	11	2	1	1	2	12	2	5	8	5	7	2	4	12	15		75	3
143148842664995	1	0.968105	0	1	33	2	1	2	2	3	7	1	1	1	1	8	6	6	8	6	8	6	45	10	45	75	60	4	3
143148842675237	1	0.782995	1	1	54	4	1	1	2	1	2	3		1	1	16			10	5	8	7					75
143148842684456	1	0.4100493	1	1	34	2	2	3	2	3	3	2	1	1	1	8	9	8	10	7	8	5		1
143148842684457	1	2.5347449	1	2	76	6	2	1	1		8	2		1	1	12	3	9	10	8	10	7		60			75
143148842753079	1	0.6893622	1	2	44	3	2	3	2	3	2	2	1	1	1	3	5	6	6	5	6	5	2	3	60		60	3
143148842777657	1	2.148476	1	2	77	6	2	1	1	3	1	3	2	1	1	24	9	9	9	9	9	7	1		30	15	40	3	3
143148842798142	1	0.8488037	1	1	70	6	2	3	1	2	4	2	2	1	1	52	10	5	10	5	10	5	1	10	20	20	40	4	4
143148842887259	1	1.3974937	0	2	50	4	2	1	2	1	9	2	1	1	1	8	9	5	10	7	10	8	5	15	12	25	50	3	3
143148842897501	1	0.3008888	0	1	68	5	2	3	1	2	8	2	1	1	1	14	8		10	8	8	6		3	1	50	50	3	2
143148842929260	1	0.6943092	1	2	55	4	2	1	2	1	9	2	1	1	1	23	2	8	6	6	8	3	5	10	10	5	5	3	3
143148842969204	1	0.3419325	0	1	80	6	1	3	1		13	2	1	1	1	8	7	9	9		8	6		5
143148843000956	1	0.9781724	0	1	46	3	2	3	3	3	8	2	1	1	2	24	7	6	8	7	9	7	30	4	35	6	40	3	3
143148843023363	1	0.6614283	0	1	46	3	2	3	2	3	5	2	1	1	2	8	7	7	8	7	8	7	3	4	10	10	30	2	4
143148843035654	1	3.40169	0	1	76	6	2	1	1	3	2	2	1	1	1	7	5	7	10	9	10	5		20			30
143148843048971	1	1.2531005	0	1	75	6	2	1	1	3	3	2	2	1	1	8			10	8	4			15
143148843053071	1	0.2864255	1	1	76	6	2	3	1	2	10	1	1	1	2	8	6	10	9	5	9	5	0	4	5	4	15	4	3
143148843065366	1	1.5685075	0	1	50	4	2	1	1	3	12	3	2	1	2	29	9	8	10	8	10	7	1	8			20
143148843066391	1	0.3448625	1	1	77	6	1	2	1		2	2	2	1	1	7	8	7	10	7	9	5
143148843069465	1	0.9839914	1	1	78	6	2	3	1		11	2	2	1	1	48	10	9	10	9	10	9			8			4
143148843118627	1	2.4534465	0	1	77	6	1	1	1	3	1	3	2	1	1	16	6	6	9	6	9	8	30	30	50	30	40	3	3
143148843142186	1	0.3900459	1	1	37	2	1	1	1	3	8	3	2	1	1	8	9	8	7	7	10		1	2	1	85	40	2	3
143148843205688	1	1.1565541	0	1	73	6	2	3	1	3	11	2	1	1	1	12	5	6	9	8	8	2
143148843256896	1	0.570925	0	2	71	6	2	3	1	3	12	2	1	1	1	8	7	8	8	3	8	7	1	3	40	70	3	3	3
143148843273282	1	0.8779953	0	1	46	3	2	3	3	3	3	2	1	1	1	10	7	7	9	8	8	4	5	10	10		50	3
143148843292743	1	1.2829118	1	1	27	1	2	2	3	3	1	2	1	1	1	10	4	6	8	7	8	3	1	2	50	50		3	4
143148843300937	1	0.5983818	0	1	30	2	2	3	2		13	1	1	1	2	24	5	8	10	8	8			3
143148843335756	1	0.9489283	0	1	30	2	2	3	3	1	7	1	1	1	1	8	1	6	8	7	8	5			5		60	5
143148843351117	1	0.9145959	1	1	59	4	2	3	3	1	9	3	2	1	2	12	8	7	8	7	10	8
143148843425884	1	0.3155986	1	1	72	6	2	3	1	2	1	2	2	1	1	12	6	6	5	7	9	8	10	5	25	50	20	3	3
143148843435103	1	0.6290427	1	2	66	5	2	3	1	2	11	3	2	1	1	6	8	8	10	8	10	6			40			3
143148843499627	1	0.6118104	0	1	59	4	1	3	2	3	8	3	2	1	2	8	8	5	9	7	9	5	3	5	10	5	15	2	3
143148843507824	1	1.5053207	1	1	53	4	2	1	1	1	11	1	1	1	1	6	5	10	10	10	10	5	5	5	40			4
143148843544694	1	0.2207446	0	2	74	6	2	2	1	3	10	2	2	1	2	41	8	7	7	6	8	9	5	10	80	50	85	3	3
143148843573371	1	3.5792852	1	2	49	3	2	1	1	1	9	3	1	1	1	25	7	9	10	7	9		10	15	100	50	90	3	3
143148843608069	1	1.2297566	1	1	61	5	2	1	2	3	12	3	2	1	1	14	5	9	10	8	10	3	5	15	30		50	3
143148843631635	1	0.4130295	0	1	64	5	2	2	1		9	1	2	1	2	8	5	4	9	5	7	2	1	3	25	50	50	3	2
143148843638805	1	1.217731	0	2	47	3	2	3	2	3	5	2	1	1	1	4	5	7	8	6	8		1	5	2	20	60	3	3
143148843642903	1	0.8157756	0	1	35	2	1	2	2	2	9	2	1	1	2	3	6	3	10	8	8	5	2	3	20		15	3
143148843666461	1	0.2994861	0	2	63	5	2	3	1	2	2	2	1	1	1	12	8	9	10	6	9	7			70	50		3	3
143148843680801	1	0.5956365	1	1	76	6	2	3	1		9	2	1	1	1	4	5	5	5	5	5	7	10	10	10	20	20	3	3
143148843707434	1	0.5688961	0	1	76	6	2	2	1	2	1	2	1	1	1	4	2	5	8	6	8	5
143148843708459	1	0.3164772	1	2	46	3	2	3	2	3	3	2	2	1	1	5	8	8	9	9	8	9	30	20	10	30	60	2	3
143148843718703	1	2.5104287	0	1	75	6	2	1	1	3	2	2	1	1	1	8			10		10
143148843730994	1	0.2002161	0	1	47	3	2	1	3	3	8	2	2	2	2	33	8	8	8	8	8		15	5	30	35	30	2	2
143148843754551	1	0.6348823	1	1	35	2	2	3	5		10	2	1	1	1	14	10		10	8	10						70
143148843757624	1	0.594073	0	2	45	3	1	2	5	3	8	2	1	1	1	38	10	8	8	8	10	5	2	5	30	1	50	3	3
143148843799616	1	4.8238848	1	1	76	6	2	1	1	1	1	2	2	1	1	12	5	3	8	3	9	5			50			3
143148843806787	1	0.7314045	0	1	44	3	1	3	2	3	5	2	1	1	2	13	8	6	9	8	9	7	35	20	35	55	85	4	4
143148843854928	1	0.4771437	1	1	71	6	1	3	1	1	11	2	1	1	1	16	7		7
143148843861075	1	1.3894661	0	2	57	4	2	1	4	3	2	2	1	1	1	6	5	8	8	8	7	5	5	4	30		70	3
143148843863124	1	0.4180778	0	2	70	6	1	3	1	3	7	2	1	1	1	20	7	9	9	9	10	8			50	50	50	3	3
143148843872342	1	0.6413014	1	2	59	4	2	3	3		9	2	2	1	2	6	8	8	10	7	10			5			50
143148843910236	1	0.4462675	1	1	49	3	1	3	3	1	10	2	1	1	1	36	3	10	10	6	10	5	5	15	1	1	15	3	2
143148843919455	1	0.4643258	1	1	30	2	2	3	5		8	2		1	1	13			10	4	10	4	10	5			80
143148843923554	1	0.487012	0	1	75	6	2	3	1	3	1	3	2	1	1	10	9	7	10	6	10	9
143148843955303	1	2.6639378	0	1	30	2	2	1	2	1	12	2	1	1	1	28	5	5		5
143148843962472	1	0.5237993	1	1	76	6	1	3	1	1	12	1	1	1	1	6		8	9		9
143148843979886	1	2.2443166	0	2	30	2	2	1	2	3	12	2	1	1	1	6	4	3	2	2	3	2	2	5	60	60	60	2	2
143148843992178	1	1.7579973	1	1	66	5	2	1	1		2	3	2	1	1	12	9	5	9	6	10	9	1	10			50
143148844040310	1	0.530637	1	2	34	2	2	3	2	1	9	2	1	1	1	16	7	6	7	6	7		50	50	50	45	50	2	2
143148844077179	1	0.8418404	0	2	57	4	2	1	2	3	2	1	1	1	1	6	8	6	8	5	7		2	5	1			2
143148844113924	1	2.3925375	0	1	51	4	1	1	2	3	1	2	2	1	1	30		10	10	10	10	7		4
143148844116997	1	0.8174038	0	2	32	2	1	3	4	3	4	2	1	1	1	8	8	6	8	6	9	8	1	2	70	60	55	2	3
143148844193810	1	0.5215439	0	1	35	2	2	3	2	1	11	2	1	1	1	8	6	9	9	6	8		1	2	20	50	70	5	5
143148844194835	1	0.3873834	0	2	23	1	1	2	2	1	7	2	1	1	1	3	5	6	6	8	7	7	43	45	34	45	34	3	3
143148844297253	1	1.934953	1	1	57	4	1	1	5	1	2	2	1	1	1	12		6	9	8	10	6					90
143148844318758	1	0.6165104	1	2	52	4	1	3	2	2	4	3	2	1	1	10	9	9	9	8	9	8	2	5	75	60	50	3	3
143148844333096	1	0.6520555	0	1	55	4	2	3	2	3	3	3	2	2	2	24	1	7	10	7	10		2	9	0	95	70	3	2
143148844341290	1	2.612534	1	1	66	5	1	1	1	1	13	2	1	1	1	8	9	5	10	6	9	7	2	10	20	50	60	3	3
143148844345387	1	0.7869068	1	2	30	2	1	2	2	3	9	1	1	1	1	12	5	4	8	3	6	5	1	1	60		40	3
143148844362798	1	0.9615429	0	1	25	1	2	2	2	2	9	1	1	1	2	8	7	7	8	5	8	2	2	4	30	30	40	2	2
143148844366895	1	2.083624	0	2	50	4	2	1	5	1	9	3		1	1	28	5	8	9	7	10	8	1	2	5		40	4
143148844377137	1	0.4713936	0	1	67	5	2	3	1		13	2		1	1	24	7	7	5	7	7	1		1	4			2
143148844393526	1	0.5018625	1	2	66	5	2	3	1	3	2	2	1	1	1	8	3	7	5	8	8	6	3	3	50	30	15	2	2
143148844428351	1	0.3300992	1	1	78	6	1	2	1		13	2	1	1	1	10	6	8	8	8	8
143148844448840	1	0.8806411	0	2	34	2	1	3	2	1	7	3	1	1	1	6	5	5	5	5	5	5
143148844459086	1	3.9925131	0	1	72	6	1	1	1	3	8	2	1	1	1	8	7	6	9	7	8	7	15	25	20	50	25	3	2
143148844485720	1	0.8775349	1	2	49	3	2	3	4	2	9	2	1	1	1	12	4	9	5	9	6	5	5	4	6	60	65	2	3
143148844502107	1	0.4849952	1	1	70	6	1	2	1	3	9	2	2	1	2	6	5	6	9	7	8	6	6	6	55		10	4
143148844638319	1	0.597433	0	2	58	4	2	3	3	2	2	3	2	1	1	8	9	9	9	9	9	3	35	20		5	55		3
143148844655734	1	1.2792516	0	1	29	1	2	2	4	3	13	2	1	1	2	24	7	6	8	6	7	4	5	10	40	60	70	3	3
143148844682367	1	0.8042057	1	2	28	1	1	2	2	3	7	2	1	1	1	4	8	7	8	8	9	8	13	5	2	20	20	2	2
143148844696582	1	0.8652376	0	2	28	1	2	3	2	1	9	3	2	1	2	19	4	4	7	6	6		2	3	5	4	14	3	3
143148844697608	1	0.6839453	0	2	44	3	2	3	2	1	9	2	1	1	1	6	5	5	8	6	5	8	5	15	6	40	50	2	3
143148844697609	1	0.4141377	0	1	76	6	2	3	1	2	7	3	2	1	1	8	5	7	10	5	10	6	1	3	40	50	50	3	3
143148844709902	1	1.0213419	1	2	31	2	2	2	4	2	4	1	1	1	1	16	2	6	10	6	6		0	0		30	50		3
143148844749847	1	1.9183979	0	1	40	3	2	1	3	1	7	2	2	1	2	35		9	5	7	7	5	45	45	50			3
143148844790815	1	1.1633588	1	2	77	6	2	1	1	3	2	3	2	1	1	24	1	10	10	9	10	2					80
143148844801060	1	0.60632	1	1	35	2	2	3	2		3	3	2	1	1	12	9	6	9	7	9	8	1	2	80	60	70	2	3
143148844860469	1	0.7502629	0	1	75	6	1	3	1	3	11	2	1	1	1	24	10	6	10	6	10	8
143148844957770	1	0.4432493	0	1	75	6	2	2	1	3	2	1	1	1	2	12	7	9	8	9	8	8	20	40	5	50	50	3	4
143148844985425	1	1.2351789	1	1	19	7	1	3	1		11	1	1	1	1	12	1	7	10	7	10	1	4	5	5	20	40	1	1
143148845010013	1	0.8783312	0	2	33	2	2	2	4	3	13	2	1	1	1	24	8	7	10	7	8		10	10	80	80	80	3	3
143148845049952	1	2.7943454	1	1	23	1	1	3	1		2	2	1	1	1	8	7	8	7	9	9	5	15	8	25	40	2	3	3
143148845064294	1	1.1383375	1	2	45	3	2	3	4	1	2	2	1	1	1	6	1	8	8	2	7	2	0	1	2	12	40	2	3
143148845143165	1	1.3998212	0	1	23	1	2	3	1	3	11	1	1	1	1	16	2	7	9	6	7	0	20	2	15	25	60	2	4
143148845201412	1	0.3868944	0	1	70	6	2	3	1	3	13	2	2	1	2	12	10	10	10	10	10	7			70		50	3
143148845235220	1	1.5064351	0	2	76	6	2	1	1	3	11	3	2	1	1	20	8	7	8	7	8	7				50	40		4
143148845250582	1	0.221625	1	2	22	1	1	2	4	3	9	2	2	2	2	6	5	5	5	6	5
143148845291549	1	2.7000854	0	2	31	2	1	1	1		12	3	2	1	1	4
143148845292575	1	1.1000128	0	1	26	1	1	2	2	1	8	2	1	1	2	17	8	4	8	5	7	8	20	8	70	60	80	3	3
143148845311013	1	0.9615429	0	1	26	1	2	2	2	3	9	2	1	1	1	16	8	7	10	7	8	3		3			1
143148845324328	1	0.4386697	0	2	24	1	2	3	2		9	2	1	1	1	4	8	7		7	10	9		1
143148845427780	1	0.8074565	1	1	23	1	2	3	2		9	2	1	1	2	14	8	7	9	7	7	6	4	7	70	60	60	3	4
143148845475922	1	1.1927191	0	2	22	1	2	2	1	2	9	1	1	1	1	4	6	7	9	2	5	3	1	4		30	40		2
143148845476947	1	0.2134999	0	1	23	1	1	2	2	1	10	3	1	1	1	8	7	3	9	7	10	8
143148845507673	1	0.6454435	0	2	47	3	2	3	2	1	7	3	2	1	1	24	0	0		0			50
143148845524061	1	1.2580059	0	2	43	3	2	1	2	1	11	2	1	1	1	8	5	6	7	7	9	9	1	4	4	70	40	2	2
143148845532259	1	1.0660051	0	2	69	5	1	3	1	3	11	2	1	1	1	24	5	5	5	5	8	7	2	5	70	70	60	3	3
143148845535332	1	1.1863109	1	1	22	1	1	3	1	2	9	2	1	1	2	6	1	6	7	3	5		1	2	0	50	60	1	3
143148845539429	1	0.3951702	1	2	79	6	2	3	1	2	9	3	2	1	1	8	4	7	8	6	7	4	2	3	5	10	50	3	4
143148845539430	1	0.643597	1	2	39	2	2	3	2	1	8	3	1	1	1	10	3	8	8	7	7		12	10	55	100	80	1	2
143148845591663	1	0.5994419	0	2	78	6	2	3	1	3	11	2	1	1	1	14	2	9	10	8	8	2			5	30		2	3
143148845597810	1	0.5696818	0	2	77	6	2	2	1		13	2		1	1	14	10	4	10	6	10
143148845599860	1	1.2305944	0	2	68	5	2	1	1	3	10	2	2	1	1	6	5	5	7	5	9	5				50			3
143148845604982	1	0.3541177	1	2	66	5	2	3	1	3	8	3	2	1	1	8	2	8	10	8	10	5	15	15	25	90	5	3	2
143148845616249	1	0.2805712	0	2	23	1	2	2	2	3	2	2	1	1	2	8	3	5	8	5	8	7	1	8	70	90	40	3	4
143148845716492	1	1.6426281	1	2	32	2	2	1	2	3	11	2	1	1	1	20	2	6	9	4	7	2	10	15	20	40	30	2	3
143148845794339	1	0.8722385	0	1	32	2	2	2	2	2	4	2	1	1	1	24	5	7	8	5	7	2	1	1	1	10	40	2	3
143148845875262	1	0.7982932	1	2	75	6	2	1	1	3	10	2	1	1	1	20	7	8	8	8	9	7	10	5	10	10	40	3	3
143148845905997	1	0.9144125	1	2	30	2	1	2	3	3	2	1	1	1	1	24	5	9	9	9	8	5	15	5	50	25	15	2	3
143148845914190	1	0.5080109	0	2	75	6	1	2	1	2	9	2	2	1	1	12	5	6	10	7	10	4	2	3	10	20	10	3	4
143148845962332	1	0.2685539	0	2	72	6	2	2	1	3	2	1	1	1	1	14	3	6	7	3	8	2	1	3	30	75	60	3	3
143148845972576	1	1.1125519	1	1	21	1	2	2	1	1	5	1	1	1	1	4	2	6	4	7	6	5	1	2	5	10	15	2	3
143148846134278	1	0.5617147	1	2	58	4	1	2	5	1	11	2	2	1	1	8	1	9	9	7	5	2	1	1	10	50	60	2	3
143148846156813	1	0.60632	1	1	37	2	2	2	4	2	3	1	1	1	1	28	10	10	10	10	10	10	60	95	70	20	100	3	1
143148846159888	1	0.5988541	1	2	79	6	2	3	1	2	9	2	2	1	1	6	7	8	9	8	8
143148846273589	1	0.6122149	0	1	51	4	2	3	2	3	11	1	1	1	1	20	7	0	10	6	10		5	20	50	90	30	3	2
143148846289978	1	1.4229848	1	2	34	2	2	1	2	3	12	2	1	1	1	14	7	7	10	6	10	2	1	2	30	50	10	3	3
143148846289980	1	0.3569982	0	2	21	1	2	3	2	1	9	2	1	1	2	5	9	9	5	8	7
143148846356555	1	0.3483935	0	1	45	3	1	3	2	3	11	2	1	1	1	4	9	6	10	5	10	7	20	90	50	20	30	4	2
143148846505068	1	0.5399589	0	1	24	1	1	3	2	2	5	2	2	1	1	4	0	5	7	5	7	2	2	2	7	40	70	1	3
143148846506093	1	3.2401419	1	2	66	5	1	1	1	3	8	3	2	1	1	3	6	8		7	6		1	2	12	66	5	3	2
143148846532727	1	0.4592019	0	1	40	3	2	3	2	3	13	1	1	1	1	0			8
143148846532728	1	0.3677437	0	2	21	1	1	3	2	1	12	2	1	1	2	28					10
143148846695454	1	0.7152895	0	1	52	4	2	2	3	3	13	1	1	1	1	28	5	9	9	7	8	5	2	3	80	80	80	3	3
143148846772278	1	1.4771338	0	2	45	3	2	1	2		9	2	1	1	1	8	8	9	8	9	10	9	10	10	20	50	50	3	3
143148846772279	1	0.2713469	0	1	77	6	2	3	1		9	2	2	1	1	8	0	2
143148846772280	1	0.2035226	0	2	20	1	2	1	2	3	7	2	2	1	2	9	3	3	5	5	5	3	4	20	10	50	40	3	4
143148846848063	1	2.2966147	1	2	51	4	2	1	2		7	2	1	1	1	23	7	5	7	5	9	8	10	30	80	70	40	3	3
143148846890058	1	0.4295069	1	2	51	4	1	2	1	2	2	2	1	1	2	8	2	9	5	7	10	2	0	2	10	30	15	2	3
143148846901324	1	1.2303013	1	1	22	1	2	2	1	1	8	2	1	1	2	6	9	10	10	6	10	7	1	8	50	70	60	2	2
143148846955605	1	0.8014998	0	1	25	1	2	1	1	1	2	2	1	1	1	14		5	6	5	6	5		70	50	50	30	2	2
143148846997602	1	2.5874819	1	2	41	3	2	1	5		13	2	1	1	1	16	9	5	8	4	10	8				60	55		2
143148847011944	1	0.3437744	0	2	76	6	2	3	1	2	5	2	2	1	2	14	6	5	10	6	9	5	0	1	50	40	40	3	3
143148847030385	1	2.4825176	0	1	46	3	2	1	2	3	9	2	2	1	1	20	8	6	10	9	10	4	30	35	15	45	50	2	2
143148847090691	1	1.2351789	0	1	22	1	1	2	1		11	2	1	1	1	15	5	5	5	5	5		5
143148847291411	1	0.5151523	0	1	55	4	2	3	2		4	2		1	1	8	8	8	8	8	8	5	50	80	50	50	30	4	3
143148847435835	1	0.2	0	2	32	2	2	3	2	3	2	2	1	1	1	12	8	6	6	7	8	6		5	50	65	65	3	2
143148847441981	1	1.0878806	0	1	20	1	1	3	1	1	1	2	2	1	1	6	4	6	9	7	7	3	1	1	10	70	50	3	3
143148847590497	1	1.1536978	1	1	43	3	1	1	1	1	13	2	1	1	2	4	8	7	8	7	8	7	2	5	6	2	60	3	3
143148847731727	1	4.514485	0	1	51	4	1	1	3	3	9	2	1	1	2	8	3	5	6	5	6		5	10	2	80	80	1	1
143148847822887	1	1.077376	0	2	42	3	2	2	2	3	4	2	1	1	1	5	6	7	8	5	9	3	5	6	25	33	2	3	3
143148847862837	1	0.4706424	1	2	67	5	2	3	1	3	8	2	1	1	2	20	8	9	9	9	9	8	8	8	20	70	20	4	3
143148847958085	1	0.2942076	0	1	81	6	2	2	1	3	9	2	1	1	1	12	3	7	9	8	9	9	1	8	10	10	40	3	3
143148848060500	1	1.6629685	1	1	60	5	1	1	1	1	8	2	1	1	1	12	8	9	9	9	10	8
143148848065623	1	0.7795146	1	1	36	2	2	3	3	3	9	2	1	1	2	8	7	7	9	5	7	5	2	10	50	60	70	3	3
143148848105570	1	1.432677	0	2	46	3	2	1	2	3	7	2	1	1	1	26	8	6	8	4	4	5	3	5	50	25	20	2	2
143148848111717	1	0.5346079	1	1	80	6	1	3	1		8	2	1	1	1	8	4	5	9	5	5	6	3	5	5			3
143148848441388	1	0.246756	1	1	77	6	1	3	1	3	11	2	2	1	1	4	1		10		8	1					80
143148848443441	1	0.2825289	1	1	33	2	2	3	3	3	8	1	1	1	2	8		7	10	3	5		2	3			40
143148848504906	1	0.4587449	0	1	68	5	2	2	1	2	2	1	2	1	1	6	6	5	10	7	9	7	1	6	5	10	10	3	3
143148848648311	1	0.9244953	0	1	24	1	2	2	3	3	7	1	1	1	1	12	6	8	7	5	7	5	1	2	40	70	70	3	3
143148849237027	1	1.0333895	0	1	37	2	2	2	2	2	12	1	1	1	2	8	2	5	7	5	6		1	2	5		50	3
143148849526877	1	0.9886254	1	1	22	1	2	3	5	1	9	2	1	1	2	10	8	5	10	6	8	4
143148849721354	1	0.6994183	1	2	32	2	2	3	2	3	5	2	2	1	2	28		10	10	10	10	10					50
143148849760274	1	3.5712063	0	1	76	6	2	1	1	3	9	2	1	1	1	6	8	10	9	9	10	7
143148849802282	1	1.2207729	0	2	37	2	2	3	3	3	8	2	1	1	2	12	5	4	7	5	6	5	2	2	33	50	40	3	3
143148849936460	1	0.4079299	0	1	41	3	2	2	1		5	1	1	1	1	8	8	8	8	6	9	5	10	30
143148849943630	1	3.7968629	1	2	24	1	1	1	2		4	1	1	1	1	12	0		10		10	0	25	50	0			1
143148850222090	1	0.3796151	0	1	76	6	2	3	1	3	11	2	2	1	1	12	8	9	10	8	8						50
143148850651154	1	0.5224353	1	2	19	7	1	1	3	1	13	2	1	1	1	12	0	5			3	6		22	30	50		2	1
143148850727981	1	2.1908703	1	2	80	6	2	1	1	3	9	2	1	1	1	8	3	6	4		5	9
143148850767929	1	0.799627	0	1	27	1	2	3	2	3	12	2	1	1	2	6	4	6	5	5	7					70	60		3
143148850820167	1	1.2248099	0	2	46	3	1	1	2	1	4	2	1	1	1	37		3	6	2	7			1	1	2	60	3	3
143148850950254	1	0.9901241	1	1	20	1	1	3	1	3	2	2	2	1	1	12	10	6	8	7	8	7	45	70	45	60	80	3	4
143148851463178	1	1.0144805	1	1	34	2	2	3	2	3	9	2	1	1	2	8	9	8	8	7	9	9	20	30	10	80	75	1	3
143148851595319	1	0.228417	1	2	22	1	1	3	4	3	2	1	1	1	2	8	8	8	8	8	9		2	2	10	10	30	2	2
143148851731541	1	0.3008701	0	2	20	1	2	3	2	1	9	2	1	1	1	9	6	6	4	4	5
143148852265023	1	0.9670311	1	1	77	6	1	1	1	1	13	3	1	1	1	20	0	5	2	6	6	2			20	40	15	2	2
143148852878357	1	0.2705439	1	1	77	6	1	3	1	2	2	2	2	1	1	24	5	7	9	9	9	7
143148854130773	1	0.311983	0	2	62	5	2	2	1		11	1	1	1	1	6	5			5	9	9
143148855267342	1	0.580353	0	1	24	1	1	3	2	3	7	2	2	1	1	4	9	7	9	7	9	8	1	5	20	25	25	3	3
143148855765071	1	2.1387711	1	1	33	2	1	1	5	1	10	3	1	1	1	8	4	8	10	8	9	5			50	90	75	3	3
143148856837214	1	2.829697	1	2	33	2	2	1	4	1	3	2	1	1	1	4	6	5	8	5	8	5	1	1	40		60	4
143148857969701	1	0.2009809	1	1	25	1	2	1	2	1	9	1	1	2	2	23	2	4	4	6	4		5	5	5	57	87	3	3
143148857987121	1	0.7265103	1	2	42	3	2	3	2	3	11	2	1	1	1	22	7	7	7	7	7	7
143148858731520	1	1.2414719	1	1	22	1	1	3	1	1	10	2	1	1	1	7	8	3	9	4	8	6	5	30	30	60	70	4	4
143148859328626	1	1.3849326	0	2	32	2	2	3	3	1	13	2	1	1	1	16	4	6	8	4	8	2	2	7	10	20	3	3	3
143148860094494	1	0.4616433	1	1	34	2	2	3	2	3	10	2	1	1	2	8	7	7	7	6	8	7	5	10	20			4
143148861530149	1	0.2505595	0	1	23	1	1	1	2	3	8	3	1	1	2	28	10	9	8	8	6		23	50	99	50	80	1	3
143148861635668	1	0.215015	0	2	21	1	1	2	2	1	2	2	1	1	1	10	5	5		5	7	8	15	2	50	50	50	3	2
143148861823015	1	0.9382702	0	2	48	3	2	3	3	2	4	2	1	1	2	8	7	8	6	6	6	5	3	2	20	30	4	3	3
143148861925469	1	0.5601451	1	1	33	2	2	3	4	1	10	3	2	1	1	16	7		10		10					80	80		3
143148862177368	1	0.4882409	1	2	20	1	1	3	3	1	9	2	1	1	1	13	1	9	8	4	9	2	3	11	20	30	40	2	2
143148862235775	1	0.8921572	1	2	56	4	2	1	2	3	2	2	1	1	1	37	5	7	7	5	6	5		1	1	50	2	3	3
143148863044638	1	4.0534834	0	2	67	5	2	1	1	1	3	2	2	1	1	4	7	8	9	4	9	7	1	50	50	50	50	2	2
143148864057451	1	1.7098577	1	1	20	1	1	3	1	1	13	3	2	1	1	14	0	2	2	4	5		100	4	10	50	40	4	3
143148864410706	1	0.5336098	0	2	34	2	2	3	2	3	3	2	1	1	2	16	8	5	9	5	8	8	3	15	60	50	70	3	3
143148865407066	1	0.520554	1	1	34	2	2	3	2	3	12	1	1	1	1	20	10	7	10	7	10	8	1	2	80	20	70	2	3
143148867081335	1	1.1960122	1	2	57	4	2	1	2	1	7	3	2	1	2	12	5	5	5	7	10	5	5	5			30
143148868905040	1	0.5975947	0	1	24	1	2	3	3	3	9	2	1	1	1	4	5	7	8	7	9	5	20	40	20	60	50	2	2
143148869549082	1	0.5984131	1	2	31	2	1	2	2	3	2	1	1	1	1	8	6	6	8	6	8	2	1	2	25	65	10	2	3
143148869720093	1	0.5630576	0	2	44	3	2	3	2	1	1	1	1	1	1	8	8	5	8	3	9	4	1	3	1	10	5	1	1
143148870081599	1	1.175953	0	1	73	6	2	3	1	3	7	2	1	1	1	12	7	8	6	8	9	7			30	40	60	3	3
143148870622263	1	1.7596198	0	2	24	1	1	1	5	3	8	1	1	1	1	8	5	5	8	5	4	3	40	60	50	70	30	3	3
143148871845915	1	1.9673891	1	1	19	7	2	1	1	1	11	3		1	2	13		2	3	3	2
143148872490075	1	0.2680472	1	1	67	5	1	3	1	1	3	2	1	1	1	12	7	8	9	7	9	6
143148872701000	1	0.6935797	1	1	27	1	2	3	2		7	1	1	1	1	20	10	10	9		10						70
143148872773666	1	0.8869021	1	1	51	4	2	3	2	1	11	2	1	1	1	2	1	8	7	7	9	1			2	7		3	3
143148872853516	1	0.8432118	0	1	28	1	2	3	2	1	7	2	2	1	1	16	10	10	10	10	10	5	50	75	50		50	3
143148872885303	1	0.8229894	0	2	31	2	2	3	5	1	8	2		1	1	14	0	7	7	9	5	0	36	12	1	42	38	2	2
143148872952833	1	1.1468124	0	2	47	3	2	1	4	3	8	3	2	1	1	14	9	9	10	8	10	7		15	75	25	40	3	3
143148872990758	1	2.9446535	1	1	69	5	2	1	1	1	10	1	1	1	1	20	10	10	10	10	10	10				100	80		3
143148873001018	1	0.6971479	0	1	33	2	2	2	2	3	11	1	1	1	2	5	8	4	8	4	8	5	12	13	50	25	45	2	2
143148873206792	1	0.9727281	1	2	42	3	2	2	3	3	10	2	2	1	1	6	7	7	8	6	7	8	2	3	60	70	70	3	3
143148873305199	1	0.2631979	1	1	23	1	1	3	2	1	8	1	1	1	2	8	8	5	8	3	9	8	2	10	60	30	70	3	3
143148873314427	1	0.912263	0	2	23	1	1	1	2		5	2	1	1	1	8	0	5	2	2	2	1
143148873358428	1	0.94956	1	1	19	7	1	3	1	1	4	2	2	2	1	8	7	8	7	6	10
143148873368679	1	0.9196935	1	1	53	4	2	1	2	3	13	2	1	1	2	8	7	8	10	9	8	6		10
143148873380981	1	0.9615429	0	1	30	2	2	2	2	2	9	2	1	1	2	15	8	5	9	4	8		1	5	15	5	85	3	2
143148873396349	1	0.642726	1	2	24	1	1	3	1	1	9	2	1	1	1	52	10	9	10	9	10	8	65	90	70	80	68	2	2
143148873447532	1	0.5757492	0	1	40	3	1	3	2	1	8	2	2	1	1	12	10	10	10	7	10	10		5	50		30	3
143148873453572	1	0.615698	1	2	38	2	2	3	2	3	9	2	1	1	1	8	6	5	8	5	8	5		5	25	60	60	2	2
143148873454597	1	2.8509552	1	2	55	4	1	1	5	1	1	2	2	1	1	5	7	6	10	6	9	8	2	3	50	50	35	3	3
143148873460770	1	2.4344959	0	2	34	2	2	1	5	3	5	2	1	1	1	9			8			2			10			3
143148873462826	1	0.4658072	1	2	19	7	1	3	2	1	4	1	1	1	1	23	2							2
143148873475135	1	0.643597	1	2	39	2	2	3	2	1	8	3	1	1	1	9	6	6	6	6	6		10	10	12	12	12	2	2
143148873480280	1	0.406607	0	1	25	1	1	3	2	1	2	1	1	1	1	31	7	2	6	8	10	4	100	100	30	70	1	2	2
143148873484395	1	2.021824	0	1	22	1	2	1	3	3	12	2	1	1	2	6	9	9	5	7	4	8		40	20	10	40	3	2
143148873491469	1	0.233876	0	1	20	1	2	3	3	1	8	2	1	1	2	8	5	7	9	5	5	4	10	30	50	50	70	1	1
143148873491470	1	1.0467809	1	1	18	7	1	3	1		9	1	1	1	2	12	8		8					80
143148873494556	1	1.1849366	0	2	22	1	1	3	1	1	1	3	1	1	1	8	8	6	8	5	9	7		8	20	40	50	5	5
143148873496613	1	2.8122083	0	1	26	1	2	1	4	1	11	2	2	1	1	4	8		8		9	7
143148873499701	1	0.8716277	1	2	22	1	2	3	4	3	11	1	1	1	1	3	0
143148873509991	1	0.8530326	1	2	28	1	1	2	5	3	9	1	1	1	1	19	7	6	7	4	6	8	2	5	50	80	20	3	2
143148873513079	1	2.5693601	0	2	20	1	1	1	5		2	2	1	1	1	17					5	9	35	70			95
143169112152160	1	0.5765935	0	2	62	5	2	3	1	1	11	1	1	1	1	6	0	0	4	0	4	4	2	5	1	1	1	1	1
143169112334439	1	1.0245234	0	2	43	3	2	2	3	2	7	1	1	1	2	12	4	5	7	3	4	5	1	2	40	60	20	4	4
143169112347757	1	1.1759184	0	2	62	5	2	2	4	2	9	2	2	1	1	8	7	8	8	7	10	8	2	4			15
143169112347759	1	0.6915462	1	2	47	3	1	3	3		9	2	1	1	1	12	8	9	8	9	7	5	11	3	60	60	25	3	3
143169112348785	1	0.6223722	1	1	47	3	1	3	2	3	10	2	1	1	2	7	8	3	8	6	8	5	3	6			55
143169112366204	1	0.9489164	1	2	44	3	2	2	2	3	8	2	2	1	1	8	8	7	9	5	10	5	1	3	10	50	20	3	3
143169112432655	1	2.646297	0	1	50	4	2	1	2	1	2	2	1	1	1	52	5	5	5	5	6	5
143169112444950	1	0.5780832	0	2	44	3	1	3	2	3	8	3	2	1	1	16	10	4	10	5	8	5	1	4	50	50	60	4	4
143169112455195	1	2.2134738	0	1	45	3	2	1	2	1	2	2	1	1	1	8	8	4	9	4	9	4			80			5
143169112462367	1	0.494759	0	1	47	3	2	2	1	2	9	2	1	1	2	12	2	2	10	6	8	2	1	3	10	50	40	2	2
143169112463395	1	1.2140887	0	2	38	2	1	3	2	3	7	2	1	1	1	4	8	7	8	6	8	4	2	2	33	55	45	3	3
143169112464422	1	0.5398903	0	1	43	3	2	3	2	3	1	2	1	1	1	16	8	8	9	6	9			3			70
143169112485933	1	0.6077731	0	1	48	3	1	3	2	3	4	2	1	1	2	8	10	5	10	5	10	7	1	2	50	30	70	3	3
143169112487985	1	0.5941579	0	1	54	4	1	3	2	3	13	1	1	1	1	8	5	5	10	2	10	5			50			2
143169112561729	1	0.4152606	0	2	63	5	2	3	1	1	9	1	1	1	1	16	7	8	7	8	10	8	2	4	2	20	1	2	3
143169112603728	1	0.6476368	0	2	61	5	1	2	2	2	2	1	1	1	1	10	10	10	10	10	10	5			20	50	70	3	3
143169112610898	1	0.7960623	0	2	34	2	2	2	3	3	8	2	1	1	1	16	10	7	10	7	10	8	1	5	50	30	25	3	4
143169112616020	1	0.2454353	1	1	45	3	2	2	3		9	2	2	1	1	16	9	9	9	8	9	8		2			70
143169112616021	1	0.8134092	1	1	32	2	2	3	3	3	1	2	1	1	1	6	2	8	4	7	8	8	1	1	80	70	70	3	3
143169112678497	1	1.8823188	0	2	37	2	2	1	4	2	11	2	1	1	1	12	2	6	9	9	8	3	7	4	25	50	30	3	3
143169112788087	1	0.7837254	0	2	49	3	1	3	2	2	9	2	2	1	1	8	7		5	7	7	2			10		20	3
143169112788089	1	0.2909746	0	1	58	4	2	3	1	1	11	2	2	1	1	8	8	6	7	5	10	2	20	50	20	10	70	3	3
143169112882177	1	0.4463495	1	1	55	4	1	3	3	3	2	2		1	2	28	10	7	8	8	10	8			70	60	30	3	3
143169112886277	1	0.37348	1	1	59	4	2	3	2	3	1	2	1	1	1	6	2		8	7	9	5	1	3
143169112909841	1	1.3649164	0	1	50	4	2	1	2	3	2	1	1	1	1	24	8	10	10	10	10	5	5	3	50	50	20	2	2
143169112910867	1	0.8101206	1	1	39	2	2	3	2	3	1	2	1	1	1	6	3	6	9	5	7	3	1	4
143169112910868	1	0.842665	1	1	48	3	2	3	3		1	2	1	1	1	20	5	8	8	7	7		1	2	10	90	80	3	3
143169112924190	1	0.8198333	0	1	45	3	2	3	2	3	2	2	1	1	2	4	9	8	8	6	8	8		3	70		60	3
143169112973362	1	0.715652	1	2	36	2	1	2	2	3	2	1	2	1	1	8	7	6	9	3	8	7	1	1	30		50	3
143169112977463	1	0.7286384	1	1	56	4	1	3	4	1	9	2	2	1	1	17			8	9	9	4
143169112978488	1	0.8086124	1	2	40	3	2	2	2	3	12	1	1	1	1	6	6	5	10	4	8	3	10	2	50	70	20	3	2
143169112978489	1	0.7512753	0	2	42	3	1	3	1	1	1	2	2	1	1	4	5	5	9	7	8	5			20		4	2
143169113027651	1	0.2876929	1	1	44	3	2	3	3	1	2	2	1	1	1	10	10	7	10	9	10	5	20	60	40	80		3	4
143169113087052	1	0.4092314	0	2	55	4	2	3	1	2	6	3	2	1	1	12	9	8	10	1	7		2	10	25	40	25	3	4
143169113107545	1	0.8720648	0	1	54	4	1	3	2	3	12	2	2	1	2	8	7	7	3	6	6	6	1	1	30	40	60	3	3
143169113134179	1	0.6665466	1	1	50	4	1	1	5	1	3	2	1	1	2	16	9	9	8	9	9	4	33	33	10	20		3	2
143169113285751	1	0.6260139	1	1	53	4	2	3	4	3	2	2	1	1	1	24	6	7	6	5	8	5	1	2	1	1	3	3	4
143169113526399	1	1.7440491	1	2	32	2	1	1	1	1	7	2	2	1	1	20	5				8	5
143169113552907	1	0.5967526	0	1	64	5	2	3	3		1	2	2	1	1	12	5	2	5	3	7	3					50
143169113591833	1	2.3725112	0	1	60	5	2	1	1	1	9	2	1	1	1	6	9	8	10	7	10	5		6	85	49	45	3	2
143169113599004	1	2.0093292	1	2	34	2	1	1	2	1	3	2	1	1	2	13	8		9		8			60
143169113632814	1	0.6677022	0	2	59	4	2	3	3	2	10	2	1	1	2	12	4	7	10	7	10	3	2	5	1		30	3
143169113665591	1	0.3845144	1	1	44	3	2	3	2	1	13	2	1	1	1	8	10	6	10	6	10	8	2	5	80	60	50	3	3
143169113717838	1	0.30304	1	1	43	3	2	3	1	1	10	2	1	1	1	10	10	7	10	7	10	7	15	35	50	50	50	3	3
143169113747551	1	0.2037523	1	1	49	3	2	2	1		9	2	1	1	2	8	8	5	9	5	8	5		1	60	60	60	2	4
143169113765995	1	0.8912867	0	1	50	4	2	3	2	3	11	2	2	1	1	8	8	8	9	8	9	3	1	1			5
143169113776237	1	1.5914605	0	2	23	1	1	3	1	1	3	2	1	1	1	24	5	5		5	8	3
143169113807998	1	1.0315813	0	1	47	3	2	1	2	1	13	2	1	1	1	10	8	9	10	9	10	6	10	100	10		75	3
143169114980423	1	1.3264196	1	2	50	4	1	1	1	1	8	3	1	1	1	12	0	8	5	9	2	0	9	20	1	50	97	5	5
143169115044951	1	0.6369177	0	1	29	1	2	3	2		9	2	2	1	1	12	6	7	8	7	7		8
143169115209830	1	0.4393269	0	2	35	2	2	2	2	3	12	2	1	1	1	4	6	5	5	6	5
143169115211882	1	0.4483844	0	1	34	2	2	3	2	3	9	2	2	1	1	8	10	7	9	6	10	7	5	10	70	70	60	3	3
143169115375623	1	0.8791985	0	2	44	3	2	3	5	1	2	2	1	1	1	6	10	10	9	7	10	1	2	5	1	2	1	2	2
143169115375625	1	1.1014927	1	2	44	3	2	2	2	2	9	2	2	1	2	12	8	8	8	2	8	5	4	2	7	80	50	2	2
143169115453459	1	0.4276638	0	2	37	2	2	3	1	1	4	2	1	1	1	17	2	5	0	5	0	0	1	1	0	0	0	1	2
143169115718691	1	0.2002072	1	1	49	3	2	2	1	3	2	3	2	1	2	20	6	4	8	5	6			4		50	50		3
143169115771942	1	1.2264998	0	1	51	4	1	1	2		9	3	2	1	1	12	6	9	8	9	8	7			80		90	5
143169116027971	1	1.8136868	0	2	59	4	2	1	2	1	9	2	1	1	1	20	6	6	8	10	8	1	50	20	10			3
143169116127325	1	0.7342979	1	2	28	1	2	3	5	1	11	3	2	1	1	11	3	5	8	3	6	5	8	12	50	80	75	3	3
143169116131423	1	2.7762688	0	1	40	3	2	1	4	1	10	1	1	1	1	8	5	5	5	5	5	5
143169116210176	1	1.8014251	0	2	52	4	2	1	2	1	12	2	1	1	2	6	7	5	8	7	8	9	1	2	85	60	65	1	3
143169116288050	1	0.5718181	1	2	63	5	2	2	4	1	12	2	1	1	1	8	2	8		8			1	2
143169116295226	1	0.3087386	0	2	28	1	2	3	4	3	9	2		1	2	5	3		4
143169116363880	1	0.7977166	1	2	60	5	2	3	3	2	2	2	1	1	1	38	0	2	2	2	3	0	1	3	0	50	35	1	4
143169116466232	1	0.2455409	0	2	28	1	2	2	2	3	12	1	2	2	2	25	6	6	9	6	9		1	3	3	3	3	1	2
143169116491849	1	0.5848692	0	1	59	4	2	3	5	3	13	2	1	1	1	8	8	8	8	6	10	6	3
143169116724242	1	0.6622664	0	2	53	4	2	2	5	3	11	2	1	1	1	10	2	2	8	2	6	5	5	3
143169117016188	1	0.6771116	1	1	48	3	2	3	2	1	3	2	1	1	1	16	5	10	9	9	9	5					5
143169117077594	1	4.4953341	1	1	40	3	2	1	3	1	9	3	2	1	1	12	8	8	8	8	10
143169117251617	1	0.625222	1	1	35	2	2	3	1	1	10	1	1	1	1	12	9		10	7	10	2			20		80	3
143169117540422	1	0.4366336	0	1	40	3	2	3	2	3	2	3		1	1	13	9	6	10	4	10	8	2	5	80	6	60	2	3
143169117688904	1	2.7184639	0	2	28	1	1	1	1	1	9	2	2	1	2	48	7	6	7	6	8	7	1	3	25	35	10	3	3
143169117715483	1	1.3324974	0	1	48	3	2	3	3	1	12	2	1	1	2	8	8	7	9	5	9	6	25	50	85	70	60	1	1
143169117730847	1	1.8201474	1	1	39	2	2	1	1		10	1		1	1	2	2	3	1	2	3	2
143169117757536	1	0.4606232	1	1	35	2	1	2	2	1	9	2	2	1	1	8	8	5	6	5	8	7	2	5	50	30	70	2	2
143169117807701	1	1.2546893	0	1	60	5	2	1	1	3	12	2	2	1	1	12	5	4	9	9	9	8				50			3
143169117826067	1	0.615698	0	2	40	3	1	3	5	1	9	1	1	1	1	52	10	10	10	10	10	10	90	90	0	100	60	1	1
143169117829154	1	1.7073861	0	1	27	1	2	1	1	1	8	2	1	1	1	12	3	7	8	5	8	4	15	30	30	50	60	3	3
143169117843510	1	0.82878	1	1	54	4	2	3	2	2	7	3	1	1	1	28	1	5	9	5	10		1	5		50	40		1
143169117851740	1	0.5848974	1	1	44	3	1	3	5	1	1	2	1	1	1	28	10	10	10	8	10	5	20	50	25	25	40	2	2
143169117857914	1	0.5794548	0	2	55	4	1	3	1	3	1	2	2	1	1	12	5	7	8	5	7	5	5	10	25	20	35	3	3
143169117860870	1	0.5577928	1	1	46	3	2	3	2	1	13	2	1	1	1	12	10	9	9	9	9	7	20	20	60	50	50	3	3
143169117876280	1	0.9559163	0	2	32	2	2	3	2	3	9	2	1	1	2	8	3		8	7	8	7	3	2	10	30	50	2	2
143169117876283	1	0.8530326	0	2	33	2	2	2	3	1	9	1	1	1	2	25	3	5	8	5	9		8	2	20	12	80	3	3
143169117878340	1	0.8242204	0	1	18	7	2	3	1		12	1	1	1	1	12	7	5	7	8	8	3	70	70	40	60	50	3	3
143169117880397	1	1.191328	1	2	62	5	2	1	3	3	12	2	1	1	1	10	2	5	6	5	7	5	2	1	1	20	10	2	2
143169117882455	1	1.0524482	1	1	38	2	2	3	5	1	8	2	2	1	1	12	4	6	8	5	9	5			50	20	30	2	2
143229588859916	1	0.5801722	1	2	46	3	1	3	3	1	4	2	1	1	2	10	7	7	9	6	8	10	3	10	60	30	50	2	3
143229589154867	1	0.7238109	1	2	57	4	2	3	2		10	1	1	1	1	12	4	2	8	3	8			1	10		30	2
143229589257291	1	1.6489168	0	2	41	3	2	1	2	3	4	1	1	1	1	9	8	7	6	7	6	6
143229589368930	1	0.7535156	0	1	36	2	2	3	2	3	7	2	1	1	2	9	9	7	9	7	8	6	5	25	59			5
143229589377124	1	0.8705647	1	2	41	3	1	3	2	3	4	2	1	1	1	10	2	6	7	8	8	1	8	12	6	10	2	2	2
143229589734420	1	0.9733327	1	2	51	4	2	3	2	3	7	2	1	1	2	8	0	7	10	7	5		1	1	0	50	70	1	2
143229589746710	1	0.9019447	1	2	47	3	1	3	2	1	7	3	2	1	1	20	7	8	7	6	8	7			50		80	3
143229589777434	1	1.4235943	0	2	56	4	2	1	3	3	1	1	1	1	1	36	7	7	9	5	10			10
143229589894176	1	1.2157908	1	1	56	4	2	1	3	3	10	2	1	1	1	8	10	9	10	10	10	10	2	5		100	20		4
143229589961767	1	0.6151597	0	2	48	3	2	3	3	3	1	1	2	1	1	6	5	5	8	5	8	5	1	3	50			3
143229589987373	1	0.4080363	1	1	48	3	2	3	3	1	2	1	1	1	1	24	5	7	10	6	8	3	1	15	5	50	20	3	4
143229590009906	1	0.5484382	1	1	62	5	2	3	5	3	13	1	1	1	1	8	7	7	9	6	10	7	0	1	10	50	50	3	3
143229590220871	1	4.4191333	0	2	60	5	2	1	2	2	10	1	1	1	1	8	2
143229590281299	1	1.4870405	0	2	57	4	1	1	2	3	7	2	1	1	1	4	5	5	4	4	7	4		4	10	10	5	3	3
143229590391905	1	0.5945901	1	1	61	5	2	3	2	2	2	2	2	1	2	52	6	5	9	5	8			1	50	40	60	3	3
143229590854694	1	1.1625313	1	2	45	3	2	1	2	1	2	1	1	1	1	20	8	8	10	9	10	5	3	1	100	70	3	2	2
143229591100506	1	1.3591768	1	2	58	4	2	1	2	3	7	3	2	1	1	36	9	5	10	4	9	4			40		60	2
143229591236735	1	0.6368206	1	2	38	2	2	3	3	3	2	2	2	1	1	8	10	7	10	7	10	10	1	10	80	50	70	2	4
143229591247875	1	1.4981826	1	1	37	2	2	3	2	3	4	2	1	1	2	9	6	7	8	5	6		23	35	65	59	39	2	3
143229591492732	1	1.138745	0	2	40	3	2	3	2	3	1	2	2	1	1	40	8	6	10	8	4	10	6	3	95	60	98	2	3
143229591701602	1	0.8039449	0	2	47	3	1	3	3	2	7	2	1	1	1	12	7	6	6	6	8	5	1	1			65
143229591704683	1	1.2014966	0	2	46	3	2	3	2	3	7	2	1	1	2	12	10	10	10	9	10		5	15	50	75	50	2	2
143232740047908	1	0.711579	1	2	51	4	2	3	2	3	1	1	1	1	2	4	2	5	7	5	8	5	2	3	50	50	50	2	3
143232740167725	1	1.8747702	1	1	50	4	2	1	3	1	1	1	1	1	1	6	5	6	10	2	10	3	1	60	20	40	60	2	3
143232740739162	1	0.8233541	1	2	53	4	2	2	2	2	7	1	1	1	1	8	10	8	10	8	10	10	4	4	20	50	20	1	1
143232740964370	1	3.5497724	0	2	56	4	2	1	2	1	13	2	1	1	2	10	7	7	9	8	8	4			15			3
143232741096500	1	0.3526512	1	1	54	4	2	3	5	3	3	2	1	1	2	20	5	5	8	8	10	6	5	20	50	20	50	3	3
143232741265514	1	0.8383399	0	2	52	4	2	2	3	2	7	2	1	1	1	24	8		8			8		2	90			3
143232741307514	1	0.3471514	1	1	55	4	2	3	2	2	7	2	1	1	2	20	7	7	10	6	10	5	1	12	50			3
143232741328899	1	0.5313012	0	1	59	4	1	3	5	1	1	2	1	1	1	12	10	10	10	10	10	5					30
143232741397526	1	0.8552817	1	2	60	5	2	2	2	2	7	3	2	1	1	12	5	8	8	2	5	1	1	2	10	30	30	3	3
143232741397527	1	0.5634873	0	1	58	4	2	3	3	1	7	1	2	1	2	16	9	10	10	5	10	5		10	80	50	75	2	3
143232741512254	1	0.9222735	0	2	52	4	1	2	2	2	1	2	2	1	2	4	7	8	9	7	9	3	1	3	40	60	20	3	3
143232742013020	1	0.4839327	0	1	54	4	2	3	2		13	1	1	1	1	8	3	4	3	6	2	1	25	2	2	50	30	2	3
143233596381286	1	0.967751	0	1	60	5	2	3	2	3	7	2	1	1	2	7	5	9	10	7	7			5		25	20		2
143233596598298	1	1.5272003	1	1	52	4	2	2	2	3	7	2	1	1	1	6	3	9	7	7	7	5	1	1	10	50	30	2	4
143233597280287	1	1.9544778	0	1	54	4	1	1	2	1	1	1	1	1	1	24	8	8	9	8	8	9	15	15	50	50	35	2	2
143233598155797	1	0.8529247	1	2	59	4	2	3	5	1	13	2	2	1	1	6	1	2		5	9	2	1		10		30	2
145102464584787	2	0.9011691	1	1	40	3	1	2	2	2	9			1	1	20	5		8		6	3			45
145102464590934	2	0.4994	0	2	48	3	2	3	5	1	12			1	1	33	4		8		6	5		2		50
145102464608350	2	0.3593011	0	2	58	4	2	3	3	3	9			1	1	12	8		6		8	5		5	50		60
145102464656480	2	0.2008103	1	1	75	6	1	3	1	3	2			1	1	41	8		10		9	7		2
145102464727153	2	0.8109156	0	2	39	2	1	1	2	3	3			1	1	24	1		8		8	1		10	10	25	25
145102464733301	2	0.251888	1	2	54	4	2	3	3	2	2			1	2	12	2		7		7	8		3	90	50	40
145102464816249	2	0.5501474	0	2	45	3	2	2	2	3	2			1	1	8	3		9		5	2		5	1	50	40
145102464828542	2	1.4212375	0	2	65	5	1	1	1	1	13			1	1	52	6		6		6	6		2	70
145102464880643	2	0.88869	1	1	56	4	2	1	2	3	1			1	1	52	8		10		9	7
145102464937997	2	1.1123965	1	1	64	5	2	1	1	3	2			1	2	8	4		6		8	4		2	50	40	30
145102464974865	2	0.2490057	0	1	80	6	1	3	1	3	9			1	2	32	8		9		9	7		18			20
145102464979989	2	4.7676055	0	1	70	6	2	1	1	3	3			1	1	15	9		8		9	7		20	10
145102465062942	2	0.225384	1	2	75	6	2	2	1	2	2			1	2	26	6		8		7	6		10	45	50	40
145102465068065	2	1.3696452	0	1	42	3	2	2	2	3	9			1	2	24	4		5		6	7		2	70	50	60
145102465074211	2	1.2190667	1	1	57	4	1	3	2	2	11			1	1	12	7		9		7	7		5			30
145102465223749	2	0.6195343	1	1	56	4	1	3	3	2	1			1	2	52	8		10		8	7		10	85		30
145102465226823	2	3.4239517	1	2	69	5	1	1	1	2	12			1	1	12	5		7		7	5		7	50	70	30
145102465245259	2	0.6288686	0	1	45	3	2	2	2	1	11			1	1	40	9		9		8	5		2	30	10	10
145102465381464	2	0.2387569	0	1	73	6	1	3	1	2	3			1	1	28	3		6		10	1		3	1	50	30
145102465393757	2	0.8781437	0	2	65	5	2	3	2	3	9			1	1	48	10		10		10	7		1		50	20
145102465399903	2	3.7733212	1	1	58	4	2	1	1		8			1	1	8	8		7		8	8
145102465405024	2	0.881765	1	1	31	2	2	3	1		10			1	1	36	10		10		10	3		50	33
145102465479780	2	0.7364026	1	2	46	3	1	2	2	1	7			1	1	16	7		10		7	5		5	50	50	20
145102465533031	2	0.6387622	1	1	32	2	2	3	2	3	12			1	1	8	5		10		9	5
145102465540203	2	3.4546839	0	1	62	5	1	1	1	3	8			1	1	48	10		8		10	5		5	50	80	90
145102465546352	2	1.497004	1	2	42	3	2	1	2	3	8			1	1	20	5		8		7	2			2
145102465549426	2	0.4955243	1	1	25	1	2	3	2	3	4			1	1	35	6		5		4	7		40	60	50	60
145102465554551	2	0.3051025	0	1	79	6	2	3	1		9			1	1	52	8					7
145102465611896	2	1.3744499	1	2	60	5	2	1	1	3	11			1	1	24	5		7		6	5		5	50	50	70
145102465613945	2	1.6934074	1	2	65	5	1	1	1		9			1	1	52	7		10		10	4					15
145102465649668	2	0.346899	0	2	78	6	2	3	1	2	2			1	1	52	7		9		9	7		15	30	45	5
145102465668104	2	0.3398791	0	1	42	3	2	2	1	1	7			1	2	52	8		9		7	5		24	72	10	68
145102465683471	2	2.549857	1	1	66	5	2	1	1	3	7			1	2	48	6		10		10	5		5	50
145102465742866	2	0.2723279	0	1	78	6	1	3	1	3	10			1	1	20			10		10	6
145102465850390	2	0.96656	0	1	24	1	2	3	2	3	12			1	2	11	7		9		7	6		10
145102466184256	2	0.9270339	1	2	74	6	2	1	1	2	9			1	1	48	8		9		9	8			60	60	40
145102466240586	2	1.9857313	1	2	86	6	2	1	1	3	9			1	2	15			7		10			8	50	20	10
145102466309203	2	0.334955	0	1	64	5	2	3	1	3	8			1	2	52	5		7		5	3		1	50
145102466490464	2	1.9265013	0	1	21	1	1	3	1	3	13			1	2	9	6		9		9	9		25	8	7	32
145102466546788	2	0.1999902	0	1	30	2	2	3	2	3	10			1	1	49	7		7		8	4
145102467078184	2	0.4298423	1	1	78	6	2	2	1	2	1			1	1	12	8		9		8	6					10
145102467130422	2	0.2904694	1	2	59	4	2	2	3	2	9			1	1	50	7		10		8	8			20	10	10
145102467291262	2	0.8530218	0	1	21	1	2	3	1	1	2			1	1	48	6		6		5	3
145102467544069	2	0.6059314	1	2	60	5	1	3	2	3	5			1	1	52	3		10		6	4		1	20	30	1
145102468166680	2	4.652036	0	1	77	6	2	1	1	3	9			1	2	52	10		10		10	10			90
145102468311049	2	0.8745996	0	1	24	1	2	2	5	1	8			1	1	20	8		10		8	5		5	50	5	8
145102468403240	2	3.009472	1	1	45	3	2	1	5	1	5			1	1	27	5		9		8	3		50	70	80
145102468501544	2	0.5642729	0	1	31	2	2	3	2	3	4			1	1	50	4		9		7	5		15	20	15	10
145102468521027	2	3.8557768	1	2	78	6	1	1	1	1	9			1	2	24	7		8			8					3
145102468525128	2	0.8691675	1	1	29	1	2	3	2	3	11			1	1	16	8		9		9	5		40	50		65
145102468528225	2	0.7141964	1	2	44	3	1	2	2	3	9			1	2	24	5		6		7	7		2	50	80	60
145102468528234	2	0.2510268	1	2	55	4	1	3	2	1	11			1	2	52	7		3		3	5		20	70
145102468530291	2	2.9791308	0	1	32	2	1	1	5	1	4			1	1	16	3		7		8	3		15	10	0	50
145110510627935	2	0.3077422	1	2	74	6	2	3	1	2	12			1	1	36	6		6		7	7		15	60	50	40
145110510685289	2	0.7409027	1	2	69	5	2	1	1	1	7			1	2	20	5		9		8	5		2	10		20
145110510700653	2	4.8994783	0	1	79	6	1	1	1		9			2	1	24	9		8		9	8		30	50	60	60
145110510700655	2	0.2283295	1	2	78	6	2	2	1	2	11			1	2	52	8		9		10	6		8	60
145110510716017	2	4.9732818	1	2	29	1	1	1	5	1	1			1	1	10	10		10		10	10		60	100	100	50
145110510717042	2	0.4706204	0	2	40	3	2	3	4	3	9			1	1	43	9		9		9	9		12	80	21	27
145110510750723	2	1.0978983	1	2	80	6	1	1	1	3	4			1	1	8	8		9		9	5
145110510956637	2	2.5623581	1	2	42	3	2	1	2	1	11			1	1	30	7		8		10	7		20	50	80	60
145110511006746	2	0.3594742	0	2	45	3	2	3	2	1	7			1	1	24	3		2		2	2
145110511040546	2	2.4697283	1	2	47	3	2	1	2	2	9			1	1	29	8		9		9	8		5	70	50	20
145110511071280	2	3.4676839	0	1	76	6	1	1	1	1	9			1	1	8	5		8		10	5
145110511071281	2	0.3628755	0	1	65	5	2	3	1	2	3			1	2	24	10		10		10	6		5	30	50	30
145110511087667	2	0.2317969	0	1	30	2	1	3	3	2	8			1	1	12	0		6		7	0		5	5	30	35
145110511087670	2	1.1043004	0	1	76	6	1	1	1	3	4			1	1	36	9
145110511098947	2	0.8459331	1	2	45	3	2	3	3	2	13			1	1	51	10		10		10	10
145110511107142	2	0.5592257	0	1	40	3	2	3	3	3	12			1	2	52	5		9		9	5		60	40	80	80
145110511122512	2	1.6033637	1	1	70	6	2	1	1	3	2			1	1	52	5		7		10			15		50	20
145110511143008	2	3.314774	0	2	60	5	2	1	1	1	9			1	2	48	8		9		9	5		1	80	30	3
145110511198276	2	0.7502683	0	1	61	5	1	1	2	3	2			1	1	16	5		7		8	5			5	10	60
145110511237223	2	0.481912	1	1	26	1	2	3	2	3	6			1	1	8	6		8		8	5		1	5	20	10
145110511309826	2	4.9890679	1	1	32	2	2	1	2	1	6			1	1	28	6		8		8	5		60		50	20
145110511322132	2	0.3361021	1	2	70	6	2	2	1	2	2			1	1	52	4		10		10	7		2	50	30	20
145110511330333	2	0.4024323	1	1	75	6	2	3	1	3	1			1	1	36	7				10	7		10	50	60
145110511331360	2	1.5052636	0	2	53	4	1	1	2		8			1	1	17	10		10		10	5		5			20
145110511363109	2	0.6000584	0	1	77	6	1	3	1	1	1			1	1	8	3		7		9	7		35	20	70	25
145110511372332	2	0.4687322	1	1	72	6	2	2	1	2	13			1	1	48	5		5		4	5		1	50		20
145110511372336	2	1.0339091	0	1	78	6	2	1	1	3	1			1	1	16	6		8		8	6		20	60	50	45
145110511663205	2	0.8011001	0	2	34	2	2	1	2	1	7			1	1	52	3		10		10	3		35	15	80	75
145110511663211	2	0.8375312	0	2	27	1	2	2	2	3	2			1	2	9	7		9		8	3		60	30	50	20
145110511723557	2	1.1322577	1	1	18	7	1	3	1	3	11			1	1	9	4		8		5	3			40
145110511775853	2	0.6525656	0	2	69	5	2	2	1	3	13			1	1	26	7		8		8	7		10	50	30	20
145110511786098	2	0.9648274	1	2	45	3	2	3	4	3	2			1	1	48	4		6		8	4		5	30	45	10
145110511838216	2	1.344398	1	1	57	4	2	1	1		7			1	2	48	5		8		10	5		50		30
145110511855635	2	0.9972685	1	1	37	2	2	3	4	1	10			1	2	48	5		8		2	5		6	50	20
145110511864868	2	1.2398791	1	2	26	1	1	1	2	1	9			1	1	25	8		9		9	8		20	50	50	50
145110511889462	2	0.6891391	0	1	55	4	2	3	2	3	1			1	2	52	9		8		9	7
145110512031792	2	0.8530218	1	1	19	7	1	3	1	3	2			1	2	10	6		9		8	8		5	50	50	50
145110512148567	2	0.4706204	0	2	49	3	2	3	2	3	9			1	2	52	9		9		9					10
145110512148570	2	0.38327	1	2	78	6	2	2	1	2	9			1	1	32	7		8		9	8		3			20
145110512149595	2	2.5466848	0	2	81	6	2	1	1	2	5			1	2	52	7		7		5	7			50		50
145110512174182	2	0.2006235	1	1	38	2	2	3	3	3	11			1	1	17	8		7		7	7		50	80	50	50
145110512179310	2	0.6830233	1	1	53	4	1	1	2	1	1			1	1	8	0		5		5	0		40	0	10	30
145110512183407	2	0.234194	1	1	78	6	1	3	1	3	9			1	1	24	8		8		7	8		1			40
145110512183408	2	2.2704362	0	2	69	5	2	1	1	3	10			1	1	48	8		8		8	7		3	40	20	20
145110512224274	2	1.3340875	1	2	39	2	2	1	2	3	1			1	2	52	3		6		8	3		3	50	70	15
145110512245802	2	0.8268311	1	2	43	3	2	3	2		1			1	1	49											100
145110512311408	2	1.7791794	1	1	79	6	1	1	1	1	1			1	1	24	5		5		5	5
145110512372800	2	0.6441489	0	1	21	1	2	3	1		5			1	1	24	4		5		7	4		50	10	60	58
145110512401422	2	0.3617528	1	1	25	1	1	2	5	1	5			1	2	44	5		9		8	5		3	66		75
145110512401436	2	1.1244048	1	2	30	2	1	2	2	2	9			1	2	25	7		5		8	6		2		80	10
145110512426036	2	0.3198311	0	1	72	6	2	3	1	2	2			1	2	48	8		9		9	9		20	60		30
145110512426037	2	1.2098813	0	2	28	1	2	2	2	1	2			1	1	10	8		9		8	4		20	38	55	28
145110512426039	2	2.6102689	1	2	67	5	1	1	1	3	13			1	1	0	7		3		8	7		20	70	50	70
145110512490575	2	0.847442	0	2	75	6	2	1	1	1	2			1	1	24	8		10		10						85
145110512523359	2	1.9623331	0	1	48	3	2	1	3	3	9			1	1	16	8		8		8	5					20
145110512580675	2	0.2872563	0	2	36	2	2	3	5	3	7			1	1	12	8		8		7	8		15	80	60	15
145110512597079	2	0.6137768	1	1	33	2	2	3	2	1	11			1	1	31	3							2
145110512670750	2	0.4094336	1	2	76	6	1	3	1	1	8			1	2	48	6		8		8	6		17	60	60	40
145110512683115	2	0.813677	1	2	30	2	2	3	2	3	5			1	1	16	4		6		5	4			35		45
145110512683117	2	0.2006235	0	1	28	1	2	3	3	1	11			2	1	20	5				2	5		50	2	20	8
145110512703499	2	0.2494318	1	1	75	6	1	3	1	3	1			1	1	52	9		8		8	8		30	5	60	70
145110512709653	2	0.2724401	1	1	35	2	2	3	2		7			1	1	52	7		8		9	6		2
145110512709657	2	0.7280478	1	2	25	1	1	3	2	1	13			1	1	36	9		10		8	8		22
145110512965739	2	1.0116389	0	2	60	5	2	3	2		10			1	2	24	7		7		8	7		5			25
145110513035320	2	2.9898779	1	2	87	6	2	1	1	1	1			1	1	32	6		9		8	5		10	50	50	50
145110513042501	2	3.1088905	1	2	86	6	2	1	1	3	10			1	1	12	5		8		8	5		2	40	40	1
145110513059917	2	2.2650004	0	2	62	5	2	1	5	3	13			1	1	24	7		8		8	5		2	50		15
145110513066064	2	0.5499359	0	1	36	2	2	2	2	3	6			1	2	32	10		7		8	8			70		70
145110513156212	2	0.3194561	0	2	69	5	2	2	1		2			1	1	28	0		8		9			60	1	50	2
145110513184895	2	0.2124921	1	2	23	1	2	2	2	1	11			1	2	52	8		10		10	3		10	30	50	30
145110513349727	2	0.5014052	1	2	33	2	2	2	2	3	12			1	1	33	9		10		10	7		40	50	50	30
145110513349739	2	0.4573192	0	2	34	2	2	3	2	3	1			1	2	36	5		7		8	4		40	20	40	45
145110513354865	2	0.38327	0	2	79	6	2	2	1	2	9			1	1	52	9		9		9	9		4	75	50	60
145110513357940	2	0.5292227	0	2	82	6	2	3	1	2	9			1	1	8	9		9		9	9			50
145110513367159	2	0.5287377	1	1	55	4	2	3	2	2	8			1	2	52	7		9		5	5		3	50	45	10
145110513373305	2	0.8097907	0	1	44	3	2	2	4	1	1			1	1	24	5		8		4	3		1	30	60
145110513406990	2	1.9426171	0	2	21	1	1	3	1	1	11			1	1	52	8		9		7	7		4	50	50	60
145110513419290	2	0.5157253	1	1	25	1	2	2	3	3	8			1	1	52	7		9		8	7		3	70	30
145110513423398	2	0.3970523	0	2	54	4	1	2	1	3	1			1	2	27	10		10		10	10		10	50	60	20
145110513471540	2	0.2176819	1	1	23	1	2	3	3	3	9			1	1	10	8		7		8	8		20	85	20	35
145110513665120	2	0.5794606	0	1	59	4	2	3	3	3	10			1	2	48	7		10		7	8					70
145110513682438	2	4.645113	1	2	39	2	2	1	3	1	7			1	1	27	6		6		5	5			20
145110513691704	2	0.2124921	1	1	23	1	1	3	2	3	1			1	1	48	3		9		8	5		20	40	50	20
145110513704008	2	0.496761	0	2	71	6	2	2	1	3	9			1	1	8	6		10		6	3		2
145110513737822	2	0.5256181	0	2	56	4	2	1	2	1	8			1	1	52	5		10		10	5			10
145110513773679	2	0.5457578	0	2	60	5	2	3	1	2	11			1	2	24	8		8		8	8		40	80	50	50
145110514157686	2	3.027848	1	1	63	5	1	1	2	3	1			1	1	52	8		9		9	9		25	70	30	40
145110514205753	2	0.9037966	0	1	55	4	2	2	3	2	13			1	1	32	8		9		10	8		10
145110514206784	2	0.4138986	0	1	77	6	1	3	1		10			1	1	18	8		7		8	7			75		15
145110514235476	2	0.3558718	1	2	34	2	2	3	2	3	11			1	1	25	0		7		2	4		1	5	70	42
145110514283632	2	0.2124921	0	1	23	1	1	2	2	1	8			1	1	20	9		7		8
145110514371665	2	0.7787949	0	1	27	1	2	3	5	3	7			1	1	52	0		8		6	5		3	50	80	20
145110514387048	2	0.5447819	0	1	41	3	2	3	2	1	4			1	2	52	3		2		7	3		1	5	20	3
145110514468900	2	3.0607922	0	1	59	4	2	1	2	1	6			1	1	24	4				10					100
145110514494519	2	1.704654	1	1	37	2	2	3	2	3	7			1	2	48	10		8		9	10		10	95	50
145110514571269	2	3.2369917	1	2	24	1	1	3	4	1	12			1	2	18	4		3		3	2		5	15		10
145110514572311	2	1.1560838	0	2	21	1	1	2	1	1	11			1	1	12	1		6		7	1			2
145110514594855	2	0.9842744	0	1	69	5	2	3	1	3	4			1	1	16	8		10		7	5		2	50	10	7
145110514601002	2	0.4994345	0	2	69	5	2	2	1	2	13			1	1	25	9		8		10	6		3	40	50
145110514603051	2	0.3059454	1	1	43	3	1	3	2		5			1	2	52	10		10		7	10		25	100	75	99
145110514608176	2	0.2501985	0	1	40	3	2	3	2	2	13			1	2	4	5		5		8	5		3	70		50
145110514624572	2	0.5743297	0	1	65	5	1	3	1	3	13			1	1	52	8		9		9	8
145110514903134	2	0.4176361	0	1	68	5	2	2	1	2	1			1	2	52	8		10		10	5		5	50		30
145110514907238	2	0.2133421	1	1	80	6	2	3	1	2	12			1	1	52	2		10		6	2		2	15		50
145110514912360	2	0.3300649	0	1	68	5	2	3	1	2	7			1	2	25	9		8		9	5		2			10
145110514921581	2	0.6092556	0	2	61	5	2	3	2	1	1			1	1	11			9		8						60
145110514945138	2	0.7615102	1	1	32	2	2	3	2	3	9			1	1	24	0		6		5			30			40
145110514946163	2	1.0277561	0	1	40	3	2	3	3	3	2			1	2	24	7		10		3	7		2	10		60
145110514960509	2	3.425605	0	1	93	6	1	1	1	3	1			1	1	16	8		10		10	8		5
145110515047441	2	0.5852292	1	2	28	1	2	2	2	2	13			1	1	25	5		7		9	2		10	15	30	50
145110515060759	2	0.5904343	1	2	32	2	2	2	2	2	8			1	2	48	7		7		4	7		1	70		60
145110515063834	2	0.7009036	1	1	28	1	2	2	2	3	12			1	1	12	0		5		7	6		2	10	15	7
145110515073059	2	4.6451579	0	2	45	3	1	1	5	1	9			1	1	18	7		7		10	3			99
145110515168282	2	1.6123553	1	2	27	1	2	2	2	2	9			1	2	37	5		10		7	3		3	33	20	30
145110515275879	2	1.5910327	1	2	30	2	2	1	2	1	11			1	1	52
145110515294245	2	0.2487106	0	1	79	6	2	2	1	2	13			1	1	8	5		10		8	2		5	3	10	9
145110515300395	2	4.5536155	0	2	47	3	2	1	3	3	1			1	2	18	7		8		6	9		2	90	40	30
145110515304497	2	0.4206464	0	1	50	4	2	3	2	3	6			1	1	12	6		8		9	7		2	65	68	40
145110515322944	2	1.6103142	0	1	35	2	2	3	4	1	13			1	1	48	2		8		10	2		70	5	50	80
145110515348554	2	1.1085053	1	2	59	4	1	1	2	1	12			1	1	52	7		8		8	6		12	50	50	30
145110515349585	2	0.6511141	1	2	34	2	2	2	5	1	8			1	1	8	8		5		8	1		7	7	2	8
145110515413105	2	0.5151188	0	2	64	5	2	2	1	2	1			1	1	24	8		10		9	7			20	20	30
145110515715184	2	0.8683475	1	1	47	3	2	3	5	3	11			1	1	28	8		8		10	5		2		10	30
145110515716100	2	0.4113356	0	1	31	2	2	3	2	1	3			1	1	18	5		4		6	2		3	30		55
145110515730447	2	0.5278069	0	1	37	2	2	3	2	3	1			1	1	48	10		10		10	10		10	90	50	30
145110515738644	2	1.0265542	0	1	76	6	2	1	1	3	8			1	1	8	7		10		9	7		5	50	5	5
145110515738646	2	0.3386502	0	1	68	5	2	3	1		9			1	2	14	8		9		10	8		5	80	80
145110515803173	2	2.0339357	0	1	56	4	2	1	4	2	8			1	1	18	8		9		9	6		1	50
145110515811375	2	0.5939445	1	1	36	2	2	3	3	1	9			1	1	0
145110515817524	2	0.3487494	1	1	67	5	2	3	1	3	2			1	2	9	5		8		8	5		1	10	10	20
145110515827771	2	0.448919	1	2	48	3	2	3	2	1	10			1	1	24	1		9		8	5		1	100	10	15
145110515829822	2	1.2686711	1	2	76	6	2	1	1	3	9			1	1	12	4		8		10	3		10	20		3
145110515903610	2	0.5160325	1	1	49	3	1	3	2	3	3			2	2	13	1		7		6	4		1	20	50	70
145110516088926	2	1.4523372	0	2	46	3	1	1	3	1	2			1	1	22	8		8		9	5		80	50	90	45
145110516115569	2	1.0358919	1	2	46	3	1	2	2	3	2			1	1	48	8		9		7	5		10		50	10
145110516152439	2	1.8801439	0	1	77	6	2	1	1		2			1	1	44	9		10		9	8		5
145110516175878	2	1.1542809	1	2	55	4	2	1	2	1	7			1	2	51	6		6		6	5		50	65	50	50
145110516175879	2	0.7901329	1	1	76	6	2	1	1	1	2			1	1	12	10		8		9	8		40	50	50	50
145110516229159	2	1.193402	0	2	51	4	2	3	2	3	9			2	1	24	5		10		7	5		5			30
145110516254770	2	0.5603456	1	2	30	2	2	3	2	3	1			1	1	52	9		10		10	5		20	50	20	20
145110516267068	2	0.4940969	0	2	64	5	2	3	5	2	11			1	1	50	7		7		9	7					50
145110516276293	2	0.5819834	0	2	41	3	2	3	2	1	11			1	2	18	5		5		5	5			20	20	30
145110516497424	2	0.9698683	0	1	21	1	2	3	1	1	5			1	1	15	8		10		9	5		60	50	0	65
145110516508720	2	0.5628343	0	2	51	4	1	3	1	1	13			1	1	12	1		8		8	1		3	10		3
145110516541515	2	0.7212259	1	1	41	3	2	3	2		7			1	1	38	8		9		8	8
145110516542540	2	0.956652	1	2	78	6	2	1	1	3	3			1	1	52	4		6		8	4		20	20	40	15
145110516548693	2	1.2954718	0	2	44	3	2	3	2	2	13			1	2	10	8		8		8	8
145110516625414	2	0.5416873	1	2	29	1	2	3	2	2	2			1	2	33	7		9		8	4		10	50	75	40
145110516628494	2	0.7047635	0	2	67	5	2	2	1	2	11			1	2	52	8		9		9	9		2	50	50	60
145110516827154	2	4.7636874	1	2	26	1	1	1	1	1	6			1	1	48	10		9		9	0		60	50	40	60
145110516828179	2	0.2507639	0	2	50	4	1	3	5	3	9			1	2	36	10		10		10	4		4	75	60	65
145110516838426	2	0.753224	0	1	69	5	2	3	1	2	9			1	1	12	7		7		7	7		3	50	40	20
145110516886569	2	0.7115205	0	2	67	5	2	1	1	3	12			1	2	40	10		10		8	7		7	60	50	20
145110516890668	2	0.2000502	1	1	51	4	2	3	2	3	12			1	1	20	2		10		10	0		25	1
145110516890669	2	0.6000584	1	1	77	6	1	3	1	1	1			1	1	8	3		8		9	7		30	30	30	30
145110516900916	2	0.8891559	0	1	26	1	2	2	2	3	9			1	1	24	3		5		4	10		2	80	50	40
145110516908089	2	1.7617574	0	2	58	4	2	1	2	3	12			1	1	10	5		9		8	5		23	50	56	2
145110516908090	2	0.4882164	0	2	46	3	2	3	2	3	11			1	1	48	0		9		9
145110516924494	2	2.4897644	1	1	62	5	2	1	1	1	3			1	2	52	10		10		10	0		60	0		99
145110517174275	2	0.9009268	0	2	18	7	2	3	1		9			1	1	52	4		8		5	5		2		40	25
145110517186566	2	1.1838126	0	1	35	2	2	2	5	1	13			1	2	52	5		9		8			2	100
145110517186571	2	0.9859725	1	2	43	3	2	3	2	3	9			1	1	52	9		8		9	7		5	90	90	60
145110517187598	2	0.4313965	1	1	60	5	2	3	2		13			1	1	18	5		8		9	5		20	50
145110517203984	2	0.2555152	0	1	77	6	2	3	1	3	2			1	1	52	9		9		9	9		5	70	50	70
145110517216285	2	0.2476351	1	2	75	6	2	2	1	3	7			1	1	8	5		8		7	6
145110517264433	2	0.5336123	1	1	40	3	2	2	3	1	1			1	1	24	5		10		10	4		10	50	50	60
145110517305413	2	0.4794414	1	1	26	1	2	2	2		2			1	1	8	7				7	5
145110517317722	2	0.4264244	1	2	66	5	2	2	1	2	1			1	1	12	2		5		6	1		2	10		15
145110517368854	2	1.0044529	1	1	26	1	2	2	2		2			1	1	24	5		10		7	8		5	60	70	30
145110517420159	2	0.7179058	1	1	34	2	2	3	2	1	9			1	1	52	9		10		10	10		85	98		7
145110517496883	2	0.4127957	1	2	49	3	1	3	5	3	8			1	1	35	6		1		2	4		3	10	15	2
145110517506142	2	0.3423498	1	1	34	2	2	1	1	1	9			2	2	52	7		8		8	7		1	50	50	40
145110517578872	2	1.6144734	1	1	75	6	2	1	1	3	13			1	1	28	10		10		10	8		20	20	20	10
145110517583994	2	0.8049584	0	2	54	4	2	1	2	1	7			1	1	30	5		9		9	5			50
145110517644316	2	0.5522134	0	2	56	4	1	3	3	1	4			1	2	36	7		7		7	7		3			2
145110517696587	2	0.4219748	0	1	37	2	2	3	4	1	11			1	1	24	10		8		10	8		70	70	70	90
145110517757994	2	1.2057281	0	2	31	2	2	2	2	3	13			1	2	48	4		9		9	4		2	50	65	70
145110517805141	2	3.7672249	0	2	19	7	1	3	5	1	3			1	1	2	0		5		0	6		10	0	0	10
145110517841964	2	2.7657404	1	1	19	7	2	1	5	1	4			1	1	40	3		10		7	4		40	30	80	50
145110517846063	2	0.7592114	0	2	57	4	2	1	3	3	2			1	1	26	9		9		9	5		10	50
145110517847089	2	0.8302512	0	1	41	3	2	2	2	2	1			1	1	52	3		7		4	3		5	20	20	20
145110517855284	2	0.853423	0	2	48	3	2	3	2	3	4			1	1	48	3		7		5	3		2	10
145110517861430	2	0.1931428	1	2	56	4	2	3	2	3	2			1	2	23	7		8		8	5		3	50	25	2
145110517864510	2	0.5375531	1	2	34	2	1	2	3		8			1	1	40	8		10		7	8		2	75	60	20
145110517864512	2	0.5700149	1	2	63	5	2	3	3	2	13			1	1	48	10		7		10	6		1	60
145110518052870	2	0.9539859	0	2	63	5	2	3	2	3	3			1	2	48	8		8		10	5		3	50	30	12
145110518186014	2	0.4588803	0	2	53	4	2	3	2	3	3			1	2	8	7		6		8	4		5	25	5	10
145110518188065	2	0.5532029	1	2	49	3	2	3	2	3	9			1	2	36	7		10		9	9		20	90	60	70
145110518188066	2	0.3092117	0	2	73	6	2	3	1	3	10			1	1	32	5		5		5	5		5	50	50	7
145110518203433	2	0.3631851	1	1	74	6	2	3	1		5			1	1	14	6				9	5
145110518212654	2	2.0376506	0	2	72	6	2	1	1	2	12			1	2	20	8		10		9	8			50
145110518230071	2	0.9610369	0	1	42	3	2	3	4	1	7			1	1	20	8		8		8	8		10	50	60	30
145110518253642	2	2.1199031	0	2	43	3	1	1	2	3	8			1	1	22	6		5		6	6		23	50	33	2
145110518262871	2	0.2170367	1	1	68	5	1	3	1	3	12			1	2	48	3		8		7	8		2	30	50	20
145110518265944	2	0.5292227	0	2	75	6	2	3	1		9			1	1	12	7		9		6	7		2	50	50	20
145110518332429	2	1.0532383	0	1	44	3	2	1	2	3	9			1	1	20	8		10		10	5		20			50
145110518563966	2	0.263821	1	2	20	1	1	2	1	3	9			1	2	21	8		9		10	7		18	17	6	1
145110518568967	2	0.8928843	1	2	72	6	1	3	1	3	7			1	1	18	7		7		9	7		5	50		5
145110518573066	2	0.2264433	0	1	68	5	2	3	1	3	4			1	1	24	9		10		10	5
145110518578188	2	0.7224498	0	2	67	5	2	1	1	2	4			1	1	26	5		9		9	5		2
145110518587408	2	1.0483306	1	2	37	2	2	2	2	3	9			1	1	16	7		10		7	8		50	70	50	15
145110518593554	2	0.7765387	1	2	34	2	2	3	4	2	8			1	1	16	7		4		4	8		28	60	10	15
145110518593555	2	0.9238971	0	2	49	3	2	1	2	3	3			1	1	24	3		8		5	5		4
145110518599703	2	0.9567453	1	1	59	4	1	2	3	2	7			1	1	52	8		7		9	5		2	10	40	7
145110518657058	2	1.8486888	1	1	68	5	1	1	1	3	9			1	1	14	9		8		9	9		5	80		6
145110518662182	2	0.7706818	1	1	34	2	2	2	2	3	9			1	2	52	2				2	7		1	100	50	50
145110518704172	2	0.5489004	1	1	56	4	1	1	2	1	5			1	1	44	8		8		7	8			50
145110519016467	2	2.4332801	1	1	57	4	2	1	3	3	5			1	2	26	10		3		8	10			80	90	50
145110519026757	2	0.8576926	1	1	24	1	2	3	2	1	12			1	1	28	2		10		8	1
145110519033936	2	0.6596452	1	1	43	3	1	2	3	3	8			1	1	8	8		5		7	7		2	40	40	20
145110519044180	2	0.6900217	0	1	67	5	1	2	1	1	13			1	1	29	10		8		10	5		6	50	50	6
145110519061599	2	1.2555952	0	1	73	6	1	1	1	1	2			1	2	52	9		9		9	9		3	50	30	30
145110519070822	2	0.5446384	1	1	55	4	2	2	3	3	7			1	1	52	6		8		5	5		5	50	45	45
145110519070823	2	2.1925784	0	1	79	6	2	1	1	3	9			1	1	24	3		6		6	3			5
145110519084144	2	0.8311255	1	1	30	2	2	3	2	3	1			1	1	48	3		9		8	7		65	70		10
145110519115777	2	0.6139903	0	1	25	1	2	2	4	3	8			1	2	15	7		7		7	8		1	70	20	9
145110519286808	2	3.0194508	0	2	40	3	2	1	5	1	7			1	2	4	2		8		7	2		4	20	8
145110519392267	2	1.0689781	1	2	49	3	2	1	2	3	13			1	1	42	6		5		7	6		7	50	70
145110519392268	2	0.2994628	1	2	30	2	2	3	2	2	2			1	1	18	4		4		5	5			50	50	50
145110519398424	2	1.4436824	1	1	50	4	2	1	2	1	13			1	1	40	5		7		7	5		85	90	95
145110519398426	2	0.8902372	0	2	18	7	1	1	1	1	2			1	2	8	5		9		9	7		20	65	70	10
145110519423026	2	0.457658	1	1	68	5	1	3	1	3	9			1	1	52	7		9		9	9		10	80
145110519439415	2	0.5288248	0	1	57	4	2	1	2	3	12			1	1	32					9
145110519459904	2	0.7737189	1	2	77	6	2	1	1	3	13			1	1	28	5		10		9	4			10	60
145110519473220	2	1.0111929	0	1	22	1	2	3	2	3	2			1	1	32	7		10		9	7		50		8	80
145110519518300	2	0.8467505	1	1	75	6	2	1	1	3	1			1	1	48	9		10		10
145110519526495	2	4.6424312	0	2	30	2	1	1	3	2	2			2	1	31	4		2		5	3		5	45	25	20
145110519768085	2	0.8797777	1	2	53	4	2	1	2	1	9			1	1	10	4		6		6	4		2	5	3	3
145110519769110	2	0.4440246	1	2	47	3	2	2	3		9			1	1	0	8					7			72
145110519817256	2	0.211431	0	1	69	5	1	2	1	2	4			1	2	52	5		9		8	3		6	50		50
145110519823404	2	0.5869127	1	1	31	2	2	3	2	1	1			1	1	52	5		10		8	2		10	50	10	20
145110519826477	2	2.000603	0	2	29	1	2	3	2	3	1			1	2	52	7		7		7	6		7	75	30	60
145110519836725	2	0.3090054	1	2	30	2	2	3	2	3	8			1	1	34	8		9		9	8		60	80	40	40
145110520036451	2	0.3497165	1	1	30	2	2	3	2	1	3			1	1	44	7		9		9	8			78		25
145110520122481	2	0.5917851	0	1	36	2	2	3	2	3	8			1	1	48	5		10		8	10		1	90	70	85
145110520124530	2	0.2132232	0	2	78	6	1	2	1	2	8			1	1	52	5		9		9	5		1		25	40
145110520152080	2	0.2124921	0	1	24	1	1	2	2	3	11			1	1	24	1		3		2	1		3	50	50	60
145110520164377	2	1.5032883	0	2	58	4	2	1	2	2	10			1	1	35	10		8		10	7		50	60	60	50
145110520169514	2	1.8655075	0	1	20	1	1	3	5	1	2			1	1	12	5		6		8	5			60	60	65
145110520304693	2	0.7748006	0	1	27	1	2	3	2	3	7			1	1	12	5		7		6	8		3	80	50	15
145110520341513	2	0.2399019	0	1	32	2	1	1	1	1	9			1	1	27	2		10		9	2		30	10		40
145110520347660	2	0.972242	1	1	34	2	2	3	4	3	10			1	2	19	9		10		9	8		5	80	10	50
145110520351759	2	0.6326896	0	1	23	1	1	3	1	1	8			1	1	24	6		10		8	3		12	15	25
145110520353840	2	0.4229213	1	1	37	2	2	2	3	3	6			1	1	36	5		8		7	7			70
145110520353848	2	1.7096124	1	1	37	2	2	1	1	1	11			1	2	52	8		7		10	5
145110520375366	2	2.3739115	1	2	52	4	2	1	2		4			1	1	48	10		10		10	10			60	50
145110520479830	2	0.3683349	1	2	70	6	2	3	1	3	9			1	1	16	6		8		8	6		15	60	70	60
145110520488027	2	1.0596485	0	1	29	1	1	2	2		7			1	1	48	6		3		2	2		5	25	50	10
145110520508510	2	0.5484159	1	2	29	1	2	3	2	3	10			1	1	24	0		0		7	0		4	0	10	10
145110520508513	2	0.6869913	1	1	65	5	2	3	1	3	8			1	2	22	8		9		9	6
145110520551537	2	0.3007759	0	1	45	3	2	3	2	1	12			1	1	12	7		8		8	8		5	60	70	40
145110520559734	2	3.6866558	0	1	38	2	1	3	5	1	11			1	2	9			7		7
145110520801318	2	0.8003612	1	2	58	4	1	2	2	2	9			1	1	52	9		9		8	9		2	90		70
145110520830008	2	0.4429952	0	2	79	6	1	3	1	3	10			1	1	48	7		7		7	5
145110520894534	2	1.7948376	0	2	72	6	2	1	1	3	9			1	1	49	3		1		9	5		1	1		1
145110520897608	2	2.9447614	1	2	66	5	2	1	1	2	8			1	2	52	8		8		8	8		3	65	50	25
145110521014399	2	2.3968237	1	1	47	3	1	1	5	1	10			1	1	12	2		3		1	2		1	5	20	10
145110521199705	2	0.9881797	1	2	32	2	2	3	2	3	12			1	1	48	6		10		10	6		25	60	50	25
145110521199714	2	1.6328153	1	1	25	1	1	3	5	3	5			1	1	48	0		8		6	0		40	30	50
145110521204844	2	0.257042	1	2	78	6	2	2	1	2	9			1	1	48	6		8		8	5		5	20		10
145110521213049	2	1.3972577	1	2	33	2	2	1	2	1	9			1	1	13	6		7		6	7		1	2	3	10
145110521217147	2	2.1977075	1	1	71	6	2	1	1	3	10			1	1	51	8		9		9	7		40	50	40	20
145110521246726	2	1.9324082	1	1	55	4	2	1	2	3	8			2	1	30	7		9		9	7
145110521252876	2	1.1405009	0	2	49	3	2	1	2	1	2			1	1	32	6		6		10	5		80
145110521510918	2	0.999004	0	2	34	2	2	3	2	3	11			1	1	24	5		9		7	5		2	50
145110521510920	2	0.836266	1	1	30	2	1	2	2	2	9			1	1	52	4		8		7	6		5	60	50	40
145110521517121	2	0.5199167	0	1	25	1	2	3	2	3	9			1	2	16	7		9		10	8		8	80	60	16
145110521525327	2	0.4096357	1	2	69	5	1	2	1	3	3			1	1	14	3		9		2	3		2	15	4	40
145110521536597	2	4.652036	0	1	73	6	2	1	1	3	9			1	1	36	8		8		10	8					20
145110521544802	2	0.234885	1	1	35	2	2	3	2	3	2			1	1	48	10		10		10	10		10	60	50	50
145110521680982	2	0.1940815	0	1	34	2	2	2	2	2	3			1	1	52	7		10		5	5		1	50	60	7
145110521801738	2	0.3628903	1	1	75	6	2	2	1	3	2			1	1	51	10		10		10	10					50
145110521807888	2	1.5508713	1	2	50	4	2	1	2	1	6			1	2	24	2		8		7	8		2	80	70	20
145110521820189	2	0.6559847	0	1	71	6	2	1	1		8			1	1	34	4		8		8	4		65	20	60	55
145110521820190	2	0.4553919	0	2	77	6	1	2	1	2	13			1	1	24	5		10		6	8					5
145110521835556	2	0.4063036	0	1	66	5	2	3	1	2	11			1	1	48	3		7		5	5		2	80
145110521873460	2	1.4773584	0	2	29	1	2	3	2	1	13			1	1	51	9		7		4	8		50	98	78	67
145110522127454	2	0.8530218	1	1	19	7	1	3	1	3	2			1	1	32	5		7		8	3		20	35	70	45
145116394828915	2	0.7071989	1	2	46	3	2	3	3	3	12			1	1	48	5		8		8	9		1	90	50
145116394849405	2	1.0327961	0	2	37	2	2	3	2	2	11			1	1	12	6		9		7	7		4	40	20	10
145116394865671	2	1.1023936	0	2	52	4	1	1	3	3	6			1	1	52	5		7		8	5			50		43
145116394866698	2	0.6485579	1	2	38	2	2	3	2	3	12			1	1	6	1		3		3	1		13	10	65	5
145116394869778	2	1.7213394	1	2	44	3	2	1	2	3	7			1	1	38	5		8		7	6		8	42	15	33
145116394911793	2	0.7382678	0	1	44	3	1	3	2	3	9			1	2	52	8		8		10	7		25	50	40	50
145116394919995	2	0.4672088	1	2	55	4	1	3	2	2	9			1	1	52	2		3		4	8		7	50	1	50
145116394945622	2	0.5335884	1	2	61	5	2	3	2	3	7			1	2	26	5		8		8	3		2	10	10	8
145116394960996	2	0.2317969	1	2	33	2	1	1	2	2	12			1	1	12	7		6		6	5
145116394966118	2	0.6773353	0	1	33	2	1	3	2	3	9			1	1	16	5		3			5		60	50
145116394969194	2	0.4081954	0	1	52	4	1	2	2	1	9			1	1	40	10		10		10	8		20	80	50	20
145116394970221	2	1.0369207	1	1	49	3	2	2	2	3	5			1	2	48	8		9		7	7		20	70	30	50
145116394992641	2	1.2654677	1	2	37	2	2	3	2	1	11			1	1	8	5		5		6	5		2	50	20	10
145116394997774	2	0.8023918	0	2	39	2	2	2	2	3	5			1	1	44	5		8		8	5		2	6	50	6
145116395011098	2	0.9532909	1	2	32	2	2	3	2	3	1			2	1	48	7		7		8	7		7	60	60	35
145116395013155	2	0.6891843	0	1	50	4	2	3	2	1	9			1	1	8	10		10		10	5		40	50	30	40
145116395013156	2	2.3691517	0	2	53	4	1	1	3	3	7			1	2	16	6					5
145116395024434	2	0.3592358	0	2	51	4	2	3	2	3	5			1	1	48	6		8		7	7		10	50	50
145116395026483	2	1.4675877	0	1	53	4	1	1	2	1	11			1	1	18	10		10		10	10		30	50	40
145116395057216	2	0.3530628	0	1	47	3	2	1	1	3	8			2	2	52	3		8		7	8		20	30	85	65
145116395066435	2	0.7177297	1	1	58	4	2	1	2	3	10			1	2	32	10		8		10	8		20	70	20	40
145116395066436	2	0.9193218	1	1	27	1	1	1	5	1	2			1	1	26	8		10		8	5		40	50
145116395074636	2	1.3059701	1	1	48	3	2	1	3	2	4			1	2	26	7		8		9	10		30	90	90	80
145116395094125	2	0.6556596	0	1	50	4	1	3	3	1	13			1	1	12	1		8		5	1		4	10	55	50
145116395128846	2	0.4676366	0	2	42	3	2	3	2	2	7			1	1	52	9		10		7	10		2	100	50	20
145116395137045	2	0.7742203	0	2	54	4	2	3	2	3	2			1	1	24	8		9		8	6		2	50		10
145116395138074	2	0.4861539	1	1	59	4	2	2	2	3	13			1	1	52	8		9		10	6		25	50	5	25
145116395162672	2	0.1931775	0	1	58	4	2	3	3	3	8			1	1	12	6		7		7	9		9	90	60	30
145116395174973	2	0.8522173	0	1	58	4	2	1	2	3	7			1	2	52	10		10		10	7			70	80	98
145116395409441	2	0.8009806	1	1	41	3	2	3	3	3	1			1	1	52	10		8		10	5		2	20	40	50
145116395470914	2	0.3448095	1	2	56	4	2	3	2	2	11			1	1	12	8		9		8	7		40	70	30	30
145116395496531	2	0.7065472	0	1	52	4	1	1	2		12			1	2	28	6		8		6	6		10	60	60	80
145116395632673	2	0.917398	1	1	25	1	2	3	3	1	10			1	1	52	9		9		10	5		50	0	80	40
145116395757669	2	0.231355	0	2	40	3	2	2	2	3	13			1	2	12	8		9		9	10		15	90	30	10
145116395801725	2	1.426021	1	2	40	3	1	3	4	2	9			1	1	24	7		10		10	8		20			10
145116396146780	2	1.4218111	1	2	50	4	2	1	3	3	3			1	2	36	8		6		5	5		6	50	80	40
145116396237928	2	1.2159156	0	1	26	1	1	3	2	3	9			1	2	24	4		7		7	3		20	20		6
145116396309570	2	0.6829839	1	1	32	2	2	3	5	3	13			1	1	24	10		9		7	7		8	70	50	70
145116396333116	2	1.2156102	1	2	29	1	2	1	2	1	7			1	1	11	2		7		10	1		50	20	80	40
145119175125106	2	0.5271197	0	2	45	3	1	3	2	3	5			1	1	16	6		7		7	8		10	50	50	25
145119175139455	2	0.8003612	0	2	61	5	2	2	3	2	9			1	2	24	5		6		6	3		1	50	60	20
145119175187465	2	0.8713749	1	1	57	4	1	3	1	1	8			1	1	14	5		9		9	5		25	50	50	50
145119175296112	2	2.6530182	1	1	22	1	2	3	1	1	2			1	1	16	6		8		7	6		15	65	40	40
145119175301246	2	0.3828412	0	2	52	4	1	3	4	3	1			1	1	37	6		9		8	6		3	50	50	30
145119175305217	2	0.3260017	0	2	63	5	2	3	1	2	2			1	2	24	5		5		5	3		3	20	10	20
145119175321605	2	0.3545053	1	1	64	5	2	3	1		4			1	1	41	5		9		9	2		7			7
145119175394323	2	1.146493	1	1	24	1	2	2	1	1	13			1	1	18	4		4		6	5
145119175424038	2	1.2620939	1	1	22	1	1	2	1	1	11			1	1	20	7		4		7	5		2	10	20	10
145119175443550	2	0.8530218	0	1	20	1	2	3	1	1	2			1	2	18	5		7		7	3		4	25	50	40
145119175500895	2	0.7883688	0	1	52	4	2	1	2	1	7			1	2	40	9		8		8	7		10	70	50	40
145119175809148	2	1.3801524	0	1	43	3	2	1	1	1	2			1	1	6	3		3		4	2		8	30	5	50
145119175813134	2	0.1999902	0	1	43	3	2	3	4	1	5			1	2	48	10		8		8	6		10	75	50	60
145119175818274	2	0.4011934	0	1	71	6	1	3	1	2	3			1	2	26	2		8		7	2			20		55
145119175818275	2	0.6551397	1	1	75	6	1	3	1	3	10			1	1	32	10		8		8	8		10	40	50	12
145119175823402	2	0.4657737	1	1	64	5	2	3	1	3	2			1	2	23	8		7		7	8		6	45		35
145119175836717	2	0.2043575	1	2	44	3	2	2	2	3	10			1	1	44	8		6		6	7			1
145119175920686	2	0.9638661	0	2	45	3	2	3	2	1	2			1	2	52	2		10		8	7		10	80	70	70
145119175950431	2	1.3702108	0	2	62	5	2	1	1	3	9			1	2	24	4		8		8	4			40
145119175990383	2	1.2125631	0	1	26	1	2	3	5	1	9			1	1	31	7		10		9	10		52	35	55	50
145119176010879	2	3.4645369	0	1	69	5	2	1	1	2	2			1	1	52	10		9		10	8		1		50	40
145119176115234	2	0.9349966	0	2	54	4	2	3	3	2	8			2	2	12	5		10		8	4		5	50		30
145119176172575	2	1.2097758	1	1	30	2	2	3	4	3	4			1	1	24	7		10		10	8
145119176199220	2	0.9318424	0	2	39	2	1	3	5	1	9			1	1	52	10		10		10	10		10	90		30
145119176231957	2	0.9949542	1	1	67	5	2	1	1	2	11			1	1	52	6		8		9	3		10	30
145119176250439	2	0.258694	1	1	30	2	2	3	2	3	3			1	1	5	2		6		4	3		2	10	25	30
145119176289307	2	0.5463427	1	2	53	4	2	2	3		5			1	1	12	2					2
145119176350810	2	0.5819834	0	2	36	2	1	3	2	3	11			1	1	12	7		5		9	4		1	10	4	1
145119176426566	2	0.7322957	0	2	53	4	1	2	2		7			1	1	20	9		10		10	7
145119176433749	2	0.6927994	1	2	52	4	1	3	1	1	10			1	1	12	5		9		8	5
145119176454234	2	0.6452121	1	1	50	4	2	1	2		3			1	1	52	10		10		10	8				50
145119176474727	2	1.6602613	0	2	69	5	2	1	1	1	7			1	1	28	9		7		8	10		30	70	20	10
145119176577090	2	0.4526018	0	1	55	4	2	3	2	3	9			1	2	19	5		10		8	5			50	50
145119176616032	2	0.7278366	0	1	38	2	2	3	1	1	8			1	1	10	9		8		10	7		5			30
145119176633463	2	1.6184153	1	1	59	4	1	1	1	1	2			1	1	8	8		5		10	5			50
145119176696902	2	1.5910959	0	2	59	4	2	1	1	1	2			1	2	32	8		10		10	5		2		90
145119176714322	2	0.6734732	0	1	77	6	1	3	1	3	13			1	1	28	7		7		7	7		20	70	20	10
145119176780859	2	0.3068014	1	1	58	4	2	3	2	3	2			1	2	26	5		5		5	5				50
145119176867958	2	1.2290066	0	1	75	6	2	1	1	2	9			1	2	28	8		10		9	6			30	60	15
145119176950872	2	0.8377673	1	2	42	3	1	2	4	1	4			1	2	24	1		3		3	3		3	2	25	4
145119176957054	2	0.5195471	0	2	58	4	2	2	2	2	2			1	2	52	4		5		7	3		3	30	40	80
145119176976392	2	0.2252681	1	2	75	6	1	3	1		9			1	1	12	5		8		8	5		20		5
145119176977419	2	0.457876	0	1	68	5	2	2	1	3	11			1	1	8	2		9		8	2		5	20	50	30
145119176985615	2	4.8576769	0	2	42	3	1	1	5		7			1	1	52			10
145119176995872	2	0.4956128	1	2	57	4	2	2	2	3	11			1	2	52	2		10		5	2		2	20	50	10
145119177077832	2	0.547225	0	2	40	3	2	3	4	3	7			1	2	24	6		9		7	8		6	50		60
145119177140259	2	0.5326867	0	2	38	2	2	2	2	3	3			1	1	50
145119177145383	2	0.326474	1	1	65	5	2	2	1	2	7			1	2	52	4		10		9	4				50	50
145119177165883	2	0.9883953	1	1	72	6	1	1	1	1	12			1	2	24	5		5		8	5		6			10
145119177200724	2	0.8534648	1	2	45	3	1	2	4	2	12			1	1	20	4		8		5	2		3	10	20	8
145119177255938	2	0.8727598	0	1	20	1	1	3	1		9			1	1	24			7
145119177263159	2	2.2338451	0	2	39	2	1	1	2	1	9			1	1	49	10		8		10	10		50	99	60	50
145119177273403	2	0.3820251	1	2	50	4	2	2	2	1	9			1	1	10	5		10		9	6		2	30	40	6
145119177293900	2	0.3848159	0	1	46	3	2	2	1	1	2			1	1	32	1		7		5	1		10	10		35
145119177299030	2	0.7278565	0	1	49	3	2	3	1		1			1	1	10	7		9		7	6		5	60		40
145119177408582	2	0.6771368	0	2	52	4	1	2	3	2	8			1	1	48	3		8		8	3		1	100	40	80
145119177412680	2	1.2000948	0	2	43	3	2	2	2	3	9			1	2	51	8		7		8	6		2	65	50	6
145119177419867	2	0.5794606	1	1	54	4	2	3	2		10			1	1	26	8		7		9	2				50
145119177429090	2	0.3802149	1	1	44	3	1	3	5	3	4			1	1	52	0		7		1	0		1	0	6	6
145119177485344	2	2.8921907	1	2	40	3	1	1	4	1	8			1	1	21			2			6
145119177561192	2	0.7941094	1	2	72	6	2	3	1	3	1			1	1	48	8		9		9	8		15	80
145119177597048	2	0.3005906	1	1	52	4	2	2	1	3	9			1	1	48	10		10		10			25	100		50
145119177625623	2	2.0528151	0	2	20	1	2	3	2	1	1			1	1	37	8		5		7	7		33	25	65	80
145119177686050	2	0.7945672	1	1	51	4	2	1	5	1	2			1	1	24	5		8		7	5		15	50		60
145119177697286	2	1.4349356	1	2	50	4	2	1	1	1	10			1	1	8	9		8		8	6		1	20	59	1
145119177716754	2	0.3808646	0	2	63	5	2	2	1	3	4			1	1	48	5		6		6	7		2	50	15	3
145119177720861	2	3.4631742	0	1	51	4	1	1	1	1	11			1	1	40	8		10		8	7		10	40	60	50
145119177818144	2	0.8530218	0	1	18	7	1	1	1		2			1	1	12	6		9		6	4		10	75	58	68
145119177859181	2	0.22374	0	2	37	2	2	3	2	3	4			1	2	34	3		5		8	0		2	2	50	15
145119177864196	2	0.7114268	1	2	54	4	2	3	3		9			1	1	52			10		8	7		10	50
145119178072177	2	0.7243153	1	2	27	1	2	3	3	3	2			1	1	48	5		10		7	8		1	60		7
145119178092563	2	0.2308274	1	2	79	6	2	3	1	2	8			1	1	48	5					2
145119178103846	2	4.9998427	0	1	52	4	2	1	1	1	2			1	1	48	10		10		10	4			2	80
145119178248220	2	0.4288287	0	1	45	3	2	3	2		5			1	2	32	7		7		9	5			50
145119178265651	2	1.1540237	0	2	47	3	2	2	2	3	1			1	1	16	2		7		5	4		2	50	50	70
145119178299455	2	0.7765352	1	1	24	1	2	1	1	1	2			1	2	28	8		4		5	9		1	10	12	20
145119178434607	2	0.3423498	0	2	22	1	2	3	1	3	10			1	1	10	3		7		6	3		2	10	40	8
145119178434608	2	0.8624043	0	1	22	1	2	2	1	1	2			1	2	12	4		10		6	2		3	30	70	60
145119178480702	2	0.9530881	1	1	66	5	1	3	1	1	11			1	1	49	9		10		10	9
145119178489925	2	4.31611	1	1	42	3	1	1	5	1	11			1	1	12	10		10		10			50	0	50	50
145119178495047	2	0.5276226	0	1	48	3	1	3	5	1	12			1	1	52	10		9		9	5		40	50	50	60
145119178650693	2	2.434704	1	1	55	4	1	1	1		5			1	2	52	8		5		10	9		20	80	60	70
145119178651722	2	1.3977722	0	1	57	4	2	1	2		8			1	1	36					10
145119178658896	2	0.9310076	0	1	67	5	1	1	1	1	11			1	1	12	2		5		6	2
145119178745930	2	0.5921306	1	1	38	2	2	3	3	1	5			1	2	48	7		7		8	4		2	20	20	40
145119178746977	2	0.3520101	0	2	38	2	1	3	4	3	11			1	1	32	3		9		8	2		20	15	50	10
145119178794085	2	1.5399018	1	2	48	3	2	2	2	2	9			1	1	8	9		9		9	1		2	50	20	40
145119178797163	2	0.3389961	1	2	52	4	2	3	2	3	9			1	1	52	10		10		10	10		5	99	30	20
145119179061350	2	0.9717513	0	2	60	5	2	1	1	3	4			1	1	24	7		8		8	7		30	50		10
145119179112563	2	0.6570727	1	1	58	4	1	1	5	1	4			1	1	40	9		10		10
145119179122690	2	3.2369917	1	2	24	1	1	2	2	3	9			1	2	48	3		6		6	7		2		50	20
145119179125768	2	0.371625	1	1	80	6	1	3	1	2	1			1	1	16	5		10		10	5		3	75		6
145119179150368	2	0.5415374	0	1	19	7	1	3	1		12			2	2	52	5		5		6	5		10			8
145119179219062	2	1.1937156	1	2	48	3	2	2	2		11			1	2	0	5		8		7	3
145119179255808	2	0.6824939	1	1	52	4	2	3	2	3	1			1	1	24	4		9		5	6		3	40	60	40
145119179255933	2	0.7030441	1	1	63	5	1	3	3	2	8			1	1	48	2		9		6	3		5	20	18	9
145119179303947	2	3.8323635	1	1	51	4	1	3	1	1	8			1	1	36	9		10		10	5
145119179366429	2	1.7096124	0	1	46	3	2	1	1	1	11			1	1	28	0		3		5	1		20	1	50	20
145119179468830	2	0.625494	1	1	38	2	2	3	3	3	4			1	1	14	4		9		8	4		30			45
145119179468845	2	0.5479924	0	2	20	1	2	3	1		12			1	1	48	5		8		8	5		10	30	30	30
145119179504700	2	0.2948733	0	1	54	4	1	3	2	3	3			1	1	24	1		10		10	1		40	5	5	30
145119179505727	2	3.3641698	1	1	75	6	2	1	1	3	9			1	1	52	8		8		9	6			60
145119179514947	2	0.5497874	0	2	36	2	2	3	3	3	8			1	2	48	5		7		9	5		1	5	50	70
145119179522121	2	2.7692978	0	2	46	3	2	1	2	1	8			1	1	32	10		0		0	0		2	0	0	15
145119179530326	2	1.1176537	1	2	66	5	2	1	1	3	8			1	1	52	9		3		1	10		3	0	2	15
145119179619422	2	0.6638459	1	2	77	6	2	3	1	3	1			1	2	52	8		8		8	8		8	75	25	15
145119179634798	2	0.6773384	1	2	47	3	1	2	3		7			1	1	16	5		7		7	5				75
145119179639925	2	2.2056325	1	2	60	5	1	1	1	1	4			1	1	50	8		9		10	8		10	60		30
145119179722765	2	0.1931775	0	1	42	3	2	2	4		4			1	1	8	2		8		5	2		1	20	60	2
145119179748371	2	0.8435143	0	2	47	3	2	3	2	3	8			1	1	8	5		5		5	5		1	50	50	50
145119179841641	2	0.9092148	1	2	43	3	2	2	3	3	2			1	2	48	2		9		6	5		1	75	80	75
145119179863153	2	0.7990423	0	2	50	4	2	1	2	3	7			1	1	52	6		8		8	7		5	50	50	10
145119179901957	2	0.8957212	0	1	37	2	1	2	2	3	11			1	1	28	7		10		7	8		5	60	70	30
145119179928602	2	0.2276914	1	2	49	3	2	3	2	3	12			2	2	52	9		10		10	9		10	80	60	40
145119179935781	2	0.6893069	1	2	38	2	2	3	2	1	9			1	2	14	1		9		8	1		6	2	50	30
145119180091436	2	1.0819071	0	2	66	5	2	1	1		9			1	2	24	10		10		10	10					10
145119180243993	2	1.563144	1	2	47	3	1	2	2	3	9			1	1	40	8		9		8	5		3	50	50	30
145119180447782	2	0.4136541	0	1	40	3	1	3	1	2	2			1	1	52	5		6		5	4		2
145119180454975	2	1.1563946	0	1	42	3	2	2	5	3	11			1	1	24	6		8		6	3
145119180461122	2	0.6129383	1	1	55	4	1	3	1	3	9			1	1	24	7		8		8	9		3	30
145119180469324	2	0.257042	1	2	77	6	2	2	1	2	9			1	1	44	4		7		8	5		2	5		10
145119180634185	2	0.771173	0	2	20	1	2	3	1	1	4			1	1	52	10		10		8	9		5	60	1	30
145119180635229	2	3.8323635	0	1	20	1	1	3	5	1	11			1	2	11	4		9		7	3		46	40	10	60
145119180702743	2	0.8679237	0	2	50	4	2	3	2	3	3			1	2	24	2		5		3	5		1	10	10	3
145119180719172	2	0.9009268	1	2	20	1	1	3	1	1	9			1	1	22	2		8		2	2			30
145119180822634	2	0.8073205	1	1	18	7	2	1	1		7			1	1	49	5		9		8	5		50	50
145176470918271	2	0.7465104	0	1	21	1	1	3	1		8			1	1	52	5		6		8	5		20			15
145176471825531	2	0.6253351	1	1	23	1	2	3	1	1	7			1	2	14	8		7		9	8		20	50	30	20
145176472171582	2	1.0215148	0	1	21	1	1	3	1	3	1			1	1	28	8		9		9	8		20	80	60	18
145176472200265	2	0.2027073	0	1	40	3	2	2	3	2	1			1	1	16	5		5		5	6		35	60	50	2
145176472236112	2	0.8073205	0	1	19	7	1	3	1		7			1	1	24	4		10		6	5		40	50	20	60
145176472395778	2	1.0215148	0	1	19	7	2	3	1	3	1			1	1	33	6		8		6	5		2	30	20	5
145176473116769	2	0.7465104	1	1	18	7	1	3	1		8			1	1	48	7		9		9	7		70	70		50
145176476759142	2	0.5214252	0	1	19	7	2	3	1		8			1	1	6	4		6		7	7		30	48		25
145194353808441	2	1.3530685	0	2	43	3	2	2	2	2	12			1	1	20	1		8		5	1		3	50		25
145194353857595	2	1.8697296	0	2	51	4	2	1	2	3	2			1	1	12	0		4		4	0		2	50	50	20
145194353900606	2	1.193402	0	2	52	4	2	2	2	1	9			1	1	52	8		10		10	7		20	70	60	60
145194353954879	2	0.9027087	0	1	48	3	2	3	2	3	9			1	1	6	8		9		8	6		3	50	50	15
145194353954880	2	1.1560908	0	1	62	5	2	2	2	2	9			1	2	48	0		8		7	6		5	50
145194354043981	2	1.0483306	0	2	45	3	2	2	2	2	9			1	1	16	5		6		6	3		3	50	50	10
145194354046030	2	0.4526018	1	1	50	4	2	2	3	2	9			1	1	16	2		8		7	7		10	60		10
145194354052191	2	0.964223	1	2	42	3	2	3	2	1	11			2	2	48	3		8		4	3		5	10	40	65
145194354052195	2	0.9579314	1	1	58	4	2	3	4	1	13			1	2	52	0		7		5	10		1	100	50	20
145194354179182	2	1.0608622	0	2	33	2	2	2	2	2	9			1	1	32	4		9		6	4			10	50
145194354232434	2	1.0277561	1	1	49	3	1	3	2	1	2			1	2	16	5		9		7	2		10			40
145194354257019	2	0.2009725	0	1	33	2	2	3	2	3	3			1	2	24	9		9		9	6					25
145194354318337	2	0.8865138	1	2	45	3	1	2	2	3	13			1	1	36	1		7		3	8		2	80	40	60
145194354331654	2	0.7482988	1	2	76	6	1	3	1	3	9			1	1	12	9		9		9			3
145194354392076	2	0.4510115	1	1	67	5	2	2	1	3	10			1	1	21	6		10		8	5		2	50	80	60
145194354400272	2	0.8683475	1	1	40	3	2	3	2	1	11			1	1	6	10		10		10	7		30	75	30	30
145194354411540	2	0.820521	1	1	43	3	2	3	2	3	9			1	1	4	8								50
145194354462746	2	0.2108971	1	1	34	2	2	3	2	1	13			1	1	20	3		7		5	7		3	70	50	70
145194354467869	2	1.5084339	0	2	50	4	2	3	2	2	10			1	1	52	5				3	5		6		30
145194354484259	2	0.690936	0	2	38	2	2	3	3	2	9			1	1	52	10		8		9	8		3	85	75	65
145194354484260	2	2.8243109	1	1	50	4	1	1	3	3	4			1	1	52	5				8	5
145194354495529	2	0.5126767	1	1	78	6	1	3	1	3	9			1	2	26					10
145194354513968	2	1.195518	0	2	34	2	1	2	2	2	9			1	1	29	8		9		9	7		1	45		55
145194354516018	2	0.5609719	1	2	41	3	2	3	2	1	7			2	1	28	8		8		8	8		5	50	65	10
145194354533435	2	0.652469	1	2	55	4	2	3	2	2	4			1	1	24	7		8		8	5		5	50	50	70
145194354540607	2	1.2075195	0	2	77	6	1	1	1	1	1			1	1	48	2		8		9	1		60	15	70	30
145194354540608	2	0.3195281	1	1	77	6	1	3	1	1	11			1	1	25	7				9	5		4			10
145194354548803	2	2.3577932	0	1	70	6	2	1	1		8			1	1	20	8		5		7						20
145194354558022	2	0.6744628	1	2	33	2	2	3	3	3	4			1	1	12	10		10		10	7
145194354562120	2	3.599672	1	1	88	6	1	1	1		2			1	1	52	8		7			8		1	45	20	20
145194354587731	2	0.7681067	0	1	53	4	2	3	3	3	4			1	1	25	7		10		9	9		30	20	90	50
145194354606172	2	0.1999902	1	2	56	4	2	3	2		7			1	2	52	3		7		6	3
145194354691175	2	0.2276007	0	2	73	6	2	3	1	3	5			1	1	16	3		7		9	4		30		30	35
145194354691176	2	0.2930673	0	1	28	1	2	3	5	3	8			1	1	40	10		9		7	10		5	90	20	30
145194354823286	2	0.4745409	1	1	70	6	1	2	1	3	5			1	1	52	4		8		8	2			10	10	15
145194354866299	2	0.7102134	0	2	63	5	2	2	2	3	9			1	1	17	7		8		4	8		1	75
145194354886661	2	1.4765935	0	2	50	4	2	1	2	3	1			1	1	52	8		10		10	7		2	80	50	60
145194354950173	2	1.0483306	0	2	41	3	2	2	2	2	9			1	1	34	7		9		8	4		8	50	70	40
145194355000354	2	0.5126767	0	1	75	6	2	3	1	3	9			1	2	12	8		10		9	6		5		2
145194355008551	2	1.6155032	1	2	31	2	1	1	5	1	13			1	1	27	8		9		10	5		12		50	10
145194355013675	2	0.9859725	0	2	45	3	1	2	2	2	9			1	1	32	5		8		6	5		10	25	50	5
145194355246145	2	4.0319766	0	1	36	2	2	1	1	1	2			1	1	52	10		10		9	5		8	50	0	70
145194355332171	2	2.048154	1	1	51	4	1	1	2	3	8			1	1	25					5			50			10
145194355345492	2	3.9296789	1	2	75	6	2	1	1		2			1	1	20	10		10		10
145194355348568	2	0.3836401	1	1	53	4	2	3	3	2	8			1	2	4	2		7		3	4		2			10
145194355359842	2	0.318187	0	1	38	2	2	2	2	1	9			1	1	22	5		6		8	5		10	55	60	45
145194356070522	2	0.7890068	1	1	26	1	2	3	2	1	9			1	1	24	7		10		10	7		5	90	100	100
145194356273253	2	0.8530218	0	1	19	7	1	3	1		2			1	1	8	4		8		8	2		50	40	50	20
145194356318213	2	0.1931035	0	2	37	2	2	1	2	1	5			2	2	18	4		9		5	2		3	60	3	3
145194356427853	2	3.2151817	0	1	22	1	2	3	2	2	11			1	2	52	6		5		7	2		4	50	40	15
145194357073012	2	0.5817993	1	1	56	4	2	3	3	2	2			1	1	20	6		10		5	6		10
145194357127252	2	0.7105638	1	1	30	2	1	2	2		4			1	1	12	8		8		8	4		10	40	50	30
145194357127255	2	1.1378906	1	1	65	5	1	1	1	3	7			1	1	8	9		7		9	5
145194357141612	2	0.4821021	0	2	60	5	1	3	5	1	13			1	1	52	6		8		8	4		15	20	60	40
145194357146647	2	0.7622192	1	2	18	7	1	3	1	1	8			1	1	20	7		7		8	1		2	5	50	20
145199160661014	2	0.8269633	0	1	43	3	2	3	2	3	13			1	1	48	7		5		5	5		5	50	30
145199160667159	2	0.2512081	1	1	78	6	1	2	1	2	2			1	2	28	6		9		9	6			60
145199160672283	2	0.3672157	1	1	70	6	2	2	1	3	2			1	1	9	4		8		6	4		5			10
145199160685607	2	0.2006235	0	1	64	5	2	2	3	3	11			1	1	24	8		8		7	5		5	10	10	10
145199160686632	2	0.2276914	1	2	69	5	2	2	1	2	9			1	2	36	5		9		9	4		3	30
145199160695853	2	0.5480139	0	1	55	4	2	3	3	2	5			1	1	20	9		9		10	9		2	50	60	50
145199160702000	2	0.5924683	1	2	56	4	2	1	2	3	7			1	1	9	10		10		10	10		40	50	15	8
145199160707129	2	0.3103712	1	1	29	1	1	3	2	3	8			1	1	48	5		9		10	3					50
145199160754263	2	2.5462969	0	2	26	1	2	1	2	1	2			2	1	39	7		7		6	7		100	100	100	100
145199161117787	2	0.7772174	0	2	53	4	2	3	2	3	2			1	2	48	5		8		5	2		5	20	50	0
145199161129057	2	0.4002123	1	1	68	5	2	3	1	1	10			1	1	24	6		7		9	5		20	45	30	45
145199161150568	2	0.2008873	0	2	79	6	2	3	1		7			1	1	52	8		9		9	3		10	6	80	10
145199161165856	2	0.2869179	0	1	66	5	1	2	1	3	11			1	2	48	7		10		5	5		2	50	50	80
145199161195558	2	0.4929683	1	1	35	2	2	2	2	2	3			1	1	16	5		10		6	3		10	20	50	40
145199161218092	2	1.6878252	0	1	27	1	1	2	2	2	2			1	2	48	3		7		8	2		3	15	30	40
145199161230381	2	0.7071821	1	1	35	2	2	3	4	3	5			1	2	48	6		8		7	10		6	95	40	60
145199161230383	2	1.3916239	1	1	36	2	2	1	2		2			1	1	8
145199161282632	2	3.3504634	0	2	80	6	2	1	1	3	11			1	1	44	4		8		10	3		5	30		1
145199161312360	2	0.2452549	0	1	67	5	2	2	1		9			1	2	16	9		10		10	6
145199161424940	2	0.3032413	1	1	41	3	2	3	2	3	2			1	1	48	9		9		10	5			50
145199161538575	2	1.702144	0	1	22	1	2	3	1	1	11			1	1	24	8		7		8	1					60
145199161744420	2	1.1691139	1	1	38	2	2	3	2	1	11			1	1	26	2		4		6	1		50	3	56
145199161744425	2	0.8633903	0	2	26	1	2	1	2	1	5			1	1	12	5		8		7	5		10	50	50	10
145199161750575	2	0.4891819	0	2	74	6	1	2	1	2	13			2	1	8	5					5		2
145199161797700	2	0.2021162	0	2	61	5	1	2	2	3	7			1	1	16	6		9		10	6
145199161818200	2	0.9626745	0	2	55	4	2	1	2	3	2			1	1	28	2		4		6	2		5	20	20	15
145199161861221	2	0.8536782	1	1	55	4	2	3	5	1	1			1	1	40	8		8		8	8		50	80	20	80
145199161904255	2	1.2156102	1	2	30	2	2	1	2	3	7			1	2	8	1		6		6	6		10	50	50	50
145199161913354	2	2.0518359	0	1	28	1	2	2	3	3	13			1	1	24	9		9		8	9		2	90	75	40
145199162072179	2	0.7796865	0	1	36	2	2	3	2	3	9			1	2	48	10		9		9	8		10	60	60	30
145199162220552	2	0.3079404	0	2	76	6	2	3	1	2	11			1	2	13	3		8		8	3				50
145199162235941	2	0.5063315	0	2	59	4	2	3	5	1	3			1	1	16	7		9		8	7		3	30	80	60
145199162242131	2	0.363215	0	2	72	6	1	2	1	2	5			1	1	48	3		8		6	3		2	15	50	20
145199162248281	2	0.2131906	1	1	77	6	1	2	1	3	8			1	1	14	2		8		6	7		10	35	35	50
145199162248285	2	0.4996809	1	1	33	2	1	3	1	1	5			1	2	52	9		9		8	8		5	80	70	60
145199162251360	2	1.4824758	1	2	60	5	2	1	1		2			1	1	27	7		8		10	8		8	15		16
145199162287212	2	1.146493	1	1	19	7	2	3	1		13			1	2	10	5		6		9	7		6		70	20
145199162727499	2	0.4210663	0	1	67	5	2	3	1		10			1	2	4	3		8			2		3	20
145199162728542	2	0.290261	1	1	75	6	1	3	1	3	13			1	1	8	4		7		7	3
145199162730612	2	0.6551933	1	1	34	2	2	3	1	1	2			1	1	48	0		8		8	5		3	50
145199162735622	2	0.5707711	0	2	52	4	2	3	2		9			1	1	24	5		8		7	6			50
145199162759190	2	0.2108971	0	1	37	2	2	2	2		13			1	1	22	6		9		8	4		5	30	50	60
145199162764311	2	0.7765694	0	2	73	6	2	2	1	2	9			1	1	24	6		9		10	4		8	10	50	10
145199162765340	2	0.8052745	1	1	51	4	2	3	2	2	1			1	1	48	10				8	3			30
145199162769440	2	1.881637	1	2	53	4	2	1	1	1	1			1	1	5	4		8		8	3		2	0	50	10
145199162825789	2	2.4966733	0	1	34	2	2	1	2	1	7			1	2	26	8		10		10	9		60	90	50	70
145199162847309	2	4.8519596	0	1	75	6	2	1	1	3	2			1	1	44	8		9		9	8
145199162848337	2	0.6630606	1	1	30	2	2	2	1	3	9			1	1	48	9		7		7	9			50	50	60
145199163138159	2	0.6660141	0	1	41	3	2	3	3	3	7			1	1	48	5		7		8	6		3	65	30	60
145199163174956	2	3.9542394	0	1	36	2	1	1	5		7			1	1	16			10		10
145199163199549	2	3.4678165	1	2	65	5	1	1	1	3	1			1	1	24					5			3			60
145199163223115	2	1.3674986	0	1	47	3	1	1	5	1	11			1	2	48			10		10	10		20	50	50	20
145199163589726	2	0.3090054	0	2	32	2	1	3	2	3	8			1	1	44	6		7		6	6
145199163714624	2	0.2532929	1	1	18	7	2	3	1	1	2			1	2	8	6		10		7	10		10	100	65	45
145199163715670	2	1.5102142	1	2	33	2	2	1	2	1	1			2	1	35	5		4		4	7		20	65	81	58
145199163715671	2	0.8722353	1	2	21	1	1	1	1	1	9			1	1	40	8		9		10	8		60	30	70	4
145199163715672	2	1.1501724	1	2	32	2	2	1	2	3	13			1	1	8	5		8		7	6			50		10
145199163721822	2	0.2317969	0	1	47	3	2	2	3	3	10			1	1	48	8		10		8	10		10	90	70	6
145199163721823	2	0.1949993	1	2	52	4	2	3	3	1	3			1	1	25	8		7		6	8		10	5	10	40
145199163788405	2	0.38327	0	2	77	6	1	2	1	3	9			1	2	24	10				10			20	50
145199163823121	2	0.9009268	0	2	20	1	2	3	1		9			1	2	32	6		8		10	6		20			30
145199163838491	2	0.4730039	1	2	35	2	2	2	2	3	10			1	1	18	2		6		7	2		2	5		65
145199164205122	2	0.7309131	0	1	21	1	2	3	1	1	2			1	2	16	10		10		10	8		40	90		80
145199164232704	2	0.4182077	1	1	47	3	1	3	4	3	4			1	1	24	8		7		9	8			80	70	40
145199164245000	2	0.6798455	0	1	62	5	1	3	5	1	2			2	1	52	0		10		7	5		1	80	80	10
145199164306472	2	0.5036144	1	1	59	4	1	2	2	3	8			1	2	51	10		9		9	8		20	70	70	30
145199164718184	2	0.7808652	1	1	39	2	2	3	2	3	1			1	1	52	10		9		8	8		7	100	10	50
145199164721265	2	0.5126767	0	1	80	6	1	3	1		9			1	2	12	7		5		8	3		20	20	50	25
145199164724339	2	0.328456	1	2	41	3	1	2	5	1	9			1	1	4	3		9		10	9				10
145199164724341	2	0.8257199	1	1	38	2	1	1	2	1	7			1	1	7	9		6		8	10		10	10	68	15
145199164740608	2	0.6810063	0	1	57	4	2	3	2	1	10			1	1	48	7		7		7	8
145199164744711	2	2.702264	1	2	63	5	2	1	1	3	4			1	1	52	8		7		8	7		5	50		70
145199164749833	2	0.9282428	1	2	32	2	2	2	3	3	7			1	1	52	5		10		9	6		1	80	99	70
145199164749834	2	2.3722285	1	2	61	5	2	1	2	2	12			1	1	31	0		10		4	0		5	1	10	15
145199164755990	2	2.1110079	0	1	28	1	1	1	5	3	12			1	1	8	0		3		5	0		99	0	99
145199164803141	2	1.0480818	1	1	65	5	2	1	1	3	9			1	1	52	6		10		10	3		2	40	30	30
145199165134921	2	0.8300595	1	2	53	4	2	1	2	3	9			1	2	52	7		7		9	8		1	20		3
145199165148278	2	0.6299708	1	2	18	7	2	3	1	3	12			1	1	22	3		4		5	5		4	50	80	60
145199165153286	2	0.3605911	1	2	63	5	1	2	2	2	4			1	1	11	10		10		10			12			1
145199165153288	2	0.4918182	0	2	75	6	2	2	1	2	11			1	1	32	7		8		8	5		5	50	30	20
145199165156362	2	1.015327	1	2	44	3	2	3	2	3	8			1	1	48	7		5		7	6		3	50	50	50
145199165179930	2	0.2897019	1	1	72	6	1	3	1	3	7			1	1	14	8		9		8	6		7	60	4	30
145199165184029	2	0.519705	1	2	42	3	2	2	2	1	1			1	1	12					2
145199165189151	2	2.5387781	0	2	48	3	2	1	1	1	10			1	1	52	7		7		7	7		30	95	30	15
145199165196326	2	0.9375319	0	1	48	3	2	3	4	1	10			1	2	44	6		10		8	8		4	50	50	20
145199165578338	2	1.1591034	1	1	19	7	2	3	1	1	13			1	2	8	5		9		5	4		20	50	50	19
145199165582440	2	0.8321129	1	1	22	1	2	3	1	1	8			1	2	24	4		8		8	4		15	45	70	70
145199165587471	2	1.1778025	0	2	29	1	2	2	3		11			1	2	12	0		6		7	0		2	1	80	6
145199165596698	2	0.2490057	0	1	75	6	2	3	1		9			1	1	16	2		10		8	6		5			30
145199165596699	2	1.0708956	1	2	74	6	2	1	1	1	10			1	1	12	3		7		9	2		3	5	10	1
145199165597724	2	0.7619588	0	1	56	4	1	3	2	3	9			1	2	51	8		7		9	8		10		40	30
145199165615149	2	0.5519656	0	1	35	2	2	3	2	1	11			1	1	52	7					7		7	70		80
145199165645875	2	0.3271907	0	2	67	5	2	2	1	2	11			1	1	48	7		10		9	5		5	50	60	15
145199165650999	2	0.2176819	0	1	85	6	1	2	1	2	2			1	2	52	5		10		9	3		7	30	70	8
145199165664315	2	0.733442	0	1	78	6	2	3	2	3	10			1	1	18	8		10		10	5		30	40	90	60
145199165697111	2	0.2276914	1	1	75	6	2	3	1	2	8			1	2	42	9		10		9	6		10	90	50	20
145199165703261	2	0.3175459	0	1	69	5	1	3	1	3	1			1	1	48	7		5		10	5		35	20	50	60
145199165713515	2	0.6072189	0	2	55	4	1	1	2	3	2			1	1	48	6		9		8	7		2	60	50	40
145199165727868	2	0.2640621	1	2	76	6	1	2	1		1			1	1	52	9		9		9	6		5	60	80	25
145199165775899	2	0.3741078	1	2	63	5	2	2	1	2	10			1	1	12	1		5		5	5		5	1	0	25
145199165838414	2	0.211431	0	1	71	6	1	3	1	3	4			1	2	41	9		9		10	7		30	50	60	10
145199166062615	2	0.3248203	0	2	39	2	2	3	2	1	2			1	1	4	4		8		6	4		15	1	20	20
145199166083147	2	0.2276914	0	2	52	4	2	2	2	3	9			1	2	31	8		6		9	8		2	80	50	6
145199166108760	2	0.2008103	0	2	75	6	2	3	1	3	2			1	2	24	5		3		9	5		9	50	50	15
145199166124128	2	1.0854741	0	2	48	3	2	2	2	2	9			1	2	26	6		9		9	6		25			10
145199166127208	2	0.2189788	1	2	28	1	1	2	2	3	7			1	1	8	9		5		8	4		3	10	20	2
145199166127211	2	0.8388861	0	2	29	1	1	1	2	1	2			1	1	10	7		8		7	5		70			60
145199166194698	2	0.2058806	1	1	27	1	2	3	2	1	11			1	2	52	9		10		9	10		60	80	60	15
145199166245936	2	1.0109818	0	2	32	2	2	3	3	3	13			1	1	8	0		7		5	9		2	90	65	30
145199166316634	2	0.555504	0	2	47	3	1	3	2	3	2			1	1	24	7		9		7	5		2	50	70	10
145199166569596	2	0.3318897	0	1	28	1	1	3	2	1	2			1	1	12	8		8		8	8		30	98	98	50
145199166637128	2	0.3236456	0	2	73	6	1	2	1	3	12			1	1	9	2		7		6	2		1	15		30
145199166642253	2	0.4778521	0	2	66	5	2	2	1	2	11			1	1	8	2		10		8			10	10
145199166642254	2	0.2713042	1	1	68	5	2	2	1	2	9			1	1	12	9		9		8	6		10	50	80	8
145199166642255	2	0.2487877	1	2	67	5	2	2	1	3	12			1	1	32	5		10		5	5		3			20
145199166648404	2	0.903495	0	2	62	5	2	3	2	3	1			1	1	48	6		6		7	7		1	60	5	60
145199166692450	2	0.6888466	0	1	58	4	2	3	4	3	11			1	1	44	7		8		7	7		1	1	20	30
145199166697571	2	3.0767446	1	2	33	2	2	1	2	1	1			1	1	0	0		0			0
145199166697572	2	1.083717	0	1	50	4	2	1	3		5			1	1	8	10		10		10	10			80
145199166742648	2	0.2310299	1	2	59	4	2	3	2	1	1			1	1	40	10		10		10	8
145199166759938	2	0.2019229	1	2	76	6	1	3	1	1	2			1	1	24	4		6		3	6		2	15		18
145199166917634	2	0.3624246	0	2	29	1	1	2	1	1	3			1	1	28	5		7		8	5			50	40	45
145199167175779	2	0.2383874	0	1	67	5	2	3	1	3	12			1	1	14	8		10		7	8		1	50	60	20
145199167219818	2	0.559165	0	1	38	2	2	2	4	3	12			2	1	48	5		5		5	3		2	30	90	50
145199167226989	2	0.8120991	1	1	55	4	2	2	2	3	7			1	1	16	8		9		9	8		1	7	50	60
145199167233143	2	0.6367517	1	2	49	3	2	1	5		8			1	2	21	5		5		7	5			50
145199167233144	2	0.5429066	0	1	29	1	2	3	2	3	12			1	1	8	0		8		6	7		2	60	50	15
145199167254529	2	0.2276914	0	1	58	4	1	2	3	3	2			1	1	52	7		10		8	3		15	20	3
145199167264771	2	0.7027829	0	2	72	6	2	3	1	3	1			1	1	27	7		10		10	6			50	80	70
145199167270919	2	0.8107752	0	1	56	4	2	3	2	2	11			1	1	48	5		9		9	5		2	50		20
145199167270922	2	0.4713717	0	2	41	3	2	3	3		8			1	2	24	7		9		9	4		4	25	15	20
145199167275022	2	3.9813858	1	2	73	6	2	1	1	1	9			1	2	38	10		9		10	8				50	2
145199167275023	2	0.7053594	1	2	42	3	2	3	2	1	9			1	1	52	5		9		8	5		2	50	30	30
145199167275027	2	1.5221467	0	1	50	4	2	1	1	1	2			1	1	40	1		9		5	1		40	1	80	45
145199167296542	2	0.3713922	0	2	29	1	1	2	5	1	4			1	1	52	4		8		4			5
145199167311904	2	0.4526018	0	1	58	4	2	3	3	3	9			1	2	12	8		7		8	8		6	50	70	10
145199167339566	2	1.9716272	0	2	49	3	2	1	2	3	8			1	1	12	8		6		9	8
145199167382600	2	0.4506166	0	1	19	7	1	3	1		3			1	1	5	3		7		7	5		3	19	6	10
145199167739945	2	0.3625728	1	2	57	4	2	3	3	2	9			1	2	24	3		8		7			1	30		30
145199167739947	2	0.6607344	1	1	23	1	2	3	1	1	2			1	1	28	7		10		8	6		30	70	75	15
145199167757368	2	0.442751	0	2	29	1	1	3	2	1	8			1	1	13	5		8		7	5			50		70
145199167768644	2	0.7092869	0	2	43	3	2	3	4		2			1	1	48	9		4		8	7		4	50	90	80
145199167778894	2	4.6024801	1	2	55	4	2	1	2	3	3			1	1	40	7		8		8	6		30	50	40	20
145199167951951	2	1.1179437	0	1	47	3	2	3	2	2	1			1	1	48	10		10		7	5		3	60	50	20
145199167983727	2	0.3148716	0	2	61	5	2	3	2	1	6			1	1	34	5		7		8	5		3	50	50	40
145199168093309	2	1.0430105	1	2	20	1	1	3	1	2	1			1	1	26	2		8		5	1		5	10	50	20
145199168097286	2	0.4396742	1	2	46	3	2	3	2	2	12			1	1	52	3		5		3	3		2	20	50	20
145199168118792	2	0.7059199	1	2	60	5	2	2	3	2	11			1	1	48	3		8		8	7		2	70	10	50
145199168118793	2	1.0116389	0	2	56	4	2	3	2	2	10			1	1	48	8				7	8
145199168126990	2	0.6456226	1	2	59	4	2	1	2	3	2			1	1	48	5		9		10	5		1			3
145199168131087	2	0.6389245	1	2	75	6	2	1	1	3	9			1	1	28	5		8		8	5		10	50	30	30
145199168133137	2	0.2765261	1	2	71	6	2	2	1	2	8			1	1	52	9		10		10	8		15	80	25	80
145199168154652	2	0.5259009	0	1	61	5	1	3	3		2			1	1	14	9		3		9	8		3	80	20	80
145199168161826	2	0.7962134	1	1	59	4	2	1	2	3	2			1	1	25	10		9		9	8		2	60	70	40
145199168161828	2	0.5364725	1	1	68	5	2	3	1		1			1	2	48	5		10		10			1		30	10
145199168228405	2	1.4679147	0	2	46	3	2	1	2	3	12			1	1	6	9		7		7	5			50
145199168254029	2	0.4042408	0	2	57	4	1	3	1	1	9			1	2	52	10		10		10	10		60	100	5	70
145199168287863	2	0.416669	1	1	34	2	1	2	2	1	1			1	1	12	6		8		5	6		20			50
145199168517132	2	0.4501313	0	1	72	6	1	3	1	3	8			1	1	26	8		9		8	4		10		10	1
145199168634989	2	0.2298259	0	1	28	1	2	3	2	3	7			1	1	14	6		10		10	8		75	75	65	37
145199168697395	2	0.8469916	1	1	67	5	2	1	1	3	3			1	2	16	7		10		10	7		10	60	50	10
145199168723009	2	1.4414295	1	1	65	5	1	1	1	1	12			1	1	0
145199168750667	2	0.5095303	0	1	52	4	2	3	3	2	4			1	1	50	9		10		9	6		3	50	50	25
145199168795747	2	0.4784318	1	2	26	1	1	3	5	1	7			1	1	5	0
145199168816241	2	0.7418051	1	2	33	2	2	2	2	3	12			1	1	16	8		3		9	6		1	33	40	20
145199169111049	2	0.9537756	1	2	39	2	1	3	3	3	12			1	2	52	5		10		8	8		2	50	80	50
145199169127478	2	0.7322957	1	2	59	4	1	2	2	2	7			1	2	52	8		9		7	8		2	70	30	70
145199169148995	2	1.5272053	1	1	44	3	2	2	3	3	13			1	1	8	6		9		6			6			8
145199169152068	2	0.3746021	0	2	76	6	2	2	1		2			1	2	48	8		8		8	4		10	33
145199169152069	2	1.5752852	1	1	31	2	2	2	2	1	13			1	2	20	10		10		7	5		10	50		30
145199169196117	2	0.5367957	1	2	73	6	2	2	1	2	2			1	1	32	9		3		9	7		2	50	50	1
145199169201244	2	1.3071488	1	1	45	3	2	3	4	1	12			1	1	18	9		10		9	5		17	50	50	20
145199169202274	2	0.5200131	0	1	68	5	1	2	1	3	2			1	1	36	8		5		8	8		3	70	40	5
145199169224808	2	0.5895215	0	1	61	5	1	3	2	2	9			1	2	48	3		4		8	3		7	20
145199169292304	2	1.0643417	1	1	40	3	2	3	2	3	8			1	1	12	7		9		9	5				50	60
145199169322021	2	2.7317989	1	2	45	3	1	1	1	1	11			1	1	52	10		9		10	10		5	90	50	70
145199169600599	2	0.303827	0	1	75	6	1	2	1	3	11			1	1	10	6		6		7	5		40	60	50	30
145199169600600	2	0.7180388	0	1	67	5	1	3	1	3	2			1	1	48	10		10		10	10		20	100	100	50
145199169625179	2	0.7762488	1	1	56	4	1	3	3	2	7			1	2	24	9		8		8	7
145199169628253	2	0.6536864	0	1	73	6	2	3	1	3	1			1	1	16	8		5		10	5					15
145199169628256	2	1.1356558	1	1	70	6	2	3	1	2	9			1	1	42								14			10
145199169637478	2	0.2019944	0	2	68	5	1	3	1	3	4			1	2	28	8		9		6	5		15	85	90	25
145199169654901	2	1.0368702	0	2	32	2	2	2	2	2	2			1	1	18	4		8		4	6		2	25	10	32
145199169664125	2	0.771173	0	2	20	1	2	2	1	1	4			1	1	52	5		9		7	5		7	50	50	70
145199169856513	2	2.0074964	0	1	77	6	2	1	1		3			1	2	48	8		3		9	6		10	50	40	25
145199169899570	2	0.8094643	0	2	28	1	2	3	2	1	1			1	2	52	7		7		10	7		10	80	50	50
145199170099306	2	0.4420446	0	2	84	6	2	3	1	3	8			2	1	0	10		10		10	10			95	100	99
145199170123893	2	0.2132227	1	2	54	4	2	3	2	3	8			1	2	44	6		9		10	6		3			5
145199170148352	2	3.5492075	0	1	63	5	2	1	2		4			1	1	12	10		10		10	10			50
145199170148475	2	0.3423498	1	2	78	6	2	1	1	3	1			1	1	48	4		8		9	4		3	40	2	40
145199170149382	2	0.4318335	1	1	60	5	1	3	1	3	11			1	1	40	10		8		9	9		5			30
145199170178061	2	0.7476349	0	2	30	2	2	3	2	3	12			1	1	20	8		8		8	9		6	78	6	5
145199170190360	2	0.8048498	0	2	46	3	1	2	2	3	9			1	1	52	7		9		9	7		2	70	50	15
145199170244672	2	0.3076468	0	1	76	6	2	3	1	3	13			1	2	48	5		6		7	7		10	50	60	40
145199170395171	2	4.6497238	0	2	58	4	2	1	2	3	8			1	1	52	6		10		10	5		10	30
145199170520065	2	0.4058663	1	2	32	2	2	3	2	3	3			1	1	12	7		8		5	7		4	70	80	40
145199170597957	2	0.7914536	0	2	58	4	1	1	2	1	2			1	2	52	5		2		8	5		3			50
145199170716703	2	4.3344186	0	2	75	6	2	1	1	2	10			1	1	48	5		5		7	5		10	25	50	40
145199170733095	2	0.6757091	1	1	60	5	2	3	4	3	5			1	1	8	7		7		5	7
145199170734123	2	0.696305	0	1	68	5	2	3	1	3	13			1	1	10	4		7		7	4		3	40		50
145199170734124	2	0.869339	0	2	50	4	2	1	2	1	2			1	2	52	5		5		7	5		15	5		30
145199170742320	2	1.1467103	0	2	67	5	1	1	1		9			1	1	52	7		9		10	5		5			15
145199170758720	2	1.0565221	1	1	26	1	2	3	2	1	7			1	1	12	5				7	5					20
145199170773067	2	0.6949253	0	2	51	4	1	1	1	1	2			1	1	52	9		9		10	7			80	70	70
145199170806882	2	1.8703941	0	1	48	3	2	1	2	1	13			1	1	39	9		8		10	7		50	60	30	70
145199171190808	2	1.8209481	1	1	32	2	2	3	3		11			1	1	44	7		7		8	4			30
145199171190816	2	1.245817	1	1	44	3	2	1	5	1	10			1	2	52	4		8		10	4		4
145199171209282	2	1.563144	0	2	49	3	2	2	4	3	9			1	2	52	10		10		10	10		10	50	50
145199171213382	2	0.4689782	1	2	52	4	1	3	2	3	10			1	1	21	4		4		5	3
145199171230797	2	0.4248016	1	1	77	6	2	3	1	3	13			1	1	32	10		10		10	5		10		50	30
145199171230801	2	1.1375831	0	2	77	6	2	1	1	3	7			1	1	24	5		8		8	5		10	50	20	15
145199171230802	2	0.4028737	1	2	38	2	1	3	5	1	11			1	1	8	4		8		7	1		5			10
145199171236954	2	0.4186211	0	1	38	2	2	3	1	1	9			1	1	12	10		7		10	10		15	50	0	25
145199171244125	2	1.5530544	0	2	46	3	2	1	2	3	5			1	2	32	10		8		8	10		2	70	60	30
145199171269742	2	0.5775638	0	2	41	3	1	3	2	3	8			1	2	48	2		10		8	5		1		75	75
145199171284085	2	0.2190672	1	2	75	6	2	2	1	2	11			1	1	12	7		8		7	5		2	50	40	25
145199171676199	2	0.8407454	1	2	76	6	2	1	1	2	2			1	2	24	8		10		10	5		15	10	50	25
145199171692638	2	0.768309	1	2	25	1	2	3	2	3	2			1	1	24	3		10		3	10		2	95	60	25
145199171701874	2	0.2512288	0	2	80	6	2	2	1	2	2			1	1	34	10		10		9	10		12
145199171735672	2	0.3224284	0	1	60	5	2	2	1		2			1	2	24	9		9		7	8		1	80	50	90
145199171757183	2	1.2556833	0	2	71	6	2	1	1	3	4			1	1	32	5		8		9	5		20	50	3	50
145199171760128	2	3.1907419	1	2	71	6	2	1	1	2	1			1	1	26	5		9		8	6		12	50	75	40
145199171768333	2	1.0294506	0	1	26	1	2	3	2	3	9			1	1	29	5		10		8	8		15	70	90	46
145199171769360	2	1.7639978	0	2	81	6	1	1	1	3	12			1	1	52	9		9		8	9
145199171769363	2	0.2006235	1	1	38	2	2	3	4	3	11			1	1	10	6		7		6	7
145199171792927	2	3.2995159	0	1	50	4	2	1	2		9			1	1	24	7		10		10	10		60	50	60
145199171814454	2	0.2317969	0	1	21	1	2	2	2	3	4			1	1	52	0		8		7	5		3
145199171845198	2	0.8727598	0	1	20	1	1	3	1	1	9			1	1	12
145199172136032	2	0.7470626	0	1	20	1	1	2	1		4			1	1	48	3		8		7	3		1	20	50	20
145199172147318	2	0.9800855	0	1	67	5	2	1	1		8			1	1	39	8		10		10	5		30			40
145199172150393	2	0.7113801	1	2	55	4	2	3	3	2	1			1	2	48	9		10		10	5			50		20
145199172160637	2	0.7369811	1	2	66	5	2	1	1	1	4			1	1	52	10		10		10	10		5	50	60	60
145199172186134	2	4.0932086	1	1	60	5	2	1	2	1	1			1	1	52	1		9		10	5		50	1	20	8
145199172186135	2	0.9475455	0	1	24	1	1	3	1	2	7			1	1	25	5		8		8	2		7	0	35	20
145199172186136	2	0.9847004	0	1	54	4	2	3	3	2	11			1	2	52	5		7		6	5		1	50	60	10
145199172214827	2	0.3119589	1	1	42	3	2	3	2	1	7			1	2	21	5		7		8	5		10			25
145199172289618	2	1.5052636	1	2	51	4	1	1	2	3	8			1	1	27	7		1		5	4		25	30	60
145199172306006	2	0.6954237	1	2	60	5	2	2	4	1	11			1	1	4	3		3		3	3		10	10	10	1
145199172316253	2	1.292018	1	1	22	1	1	2	1	3	13			1	2	12	8		7		7	6		10	30	40	30
145199172499565	2	0.1999902	0	1	30	2	2	3	2	1	9			1	2	20	10		9		10	6		60	60	70	50
145199172608054	2	0.8421595	0	1	60	5	1	1	2	1	2			1	1	52	5		10		10	4		40	20	50	70
145199172652146	2	0.6265489	1	1	34	2	2	3	3	3	7			1	1	16	9		9		9	5		5			60
145199172662291	2	2.1402423	0	1	66	5	2	1	1	3	1			1	1	43	9		8		9	7		40	50
145199172665370	2	0.9444768	0	2	75	6	1	1	1	3	3			1	1	52	8		10		10	5
145199172675622	2	1.2378765	0	2	27	1	2	3	2	2	9			1	1	48	5		8		7	5		10	50
145199172686898	2	0.4111596	1	2	63	5	2	2	5	1	3			1	1	52	4		6		7	5		1		35
145199172696118	2	0.4197421	0	2	52	4	2	3	3	3	8			1	2	52	6		7		8	8		40	85	30	60
145199172708418	2	3.4651912	1	1	70	6	1	1	1	3	8			1	1	12	7		7		8	7		10	15		50
145199172726860	2	0.2631041	0	2	43	3	2	3	4	1	4			1	1	48	5		7		7	5		1	50	70	20
145199172754532	2	0.4646586	1	2	71	6	2	3	1	2	8			1	1	52	8		9		10	7		15	60	20
145199173051516	2	0.7465104	0	1	18	7	1	3	1	1	8			1	1	34	2		8		6	3		20	5	15	60
145199173098538	2	0.3685682	1	1	38	2	2	3	2	1	9			1	2	48	7		7		7	4		5	40	3	25
145199173098541	2	0.692599	1	2	44	3	2	3	2		7			1	1	40	8		9		9	8
145199173104686	2	0.2914467	0	1	77	6	2	2	1	2	1			1	2	16	9		8		9	5		10	50	15	60
145199173125186	2	0.5532029	1	2	46	3	2	2	2	2	9			1	2	12	2		6		5	2		1	20	30	60
145199173144652	2	0.6119603	1	2	42	3	2	3	2	3	9			1	1	24	10		10		8	10		1	99	50	10
145199173144654	2	0.5310187	1	1	32	2	1	3	2	3	7			1	1	36	8		7		8	9		20	75	25	75
145199173146703	2	1.7100747	1	1	69	5	2	1	1	3	7			1	1	8	8		10		9	3			40	70	60
145199173148752	2	1.0083884	1	1	57	4	2	1	3	1	13			1	1	16	1		1		1	1
145199173160018	2	0.4613131	0	2	54	4	2	3	5	2	8			1	1	48			8		9
145199173507114	2	0.7336483	1	1	53	4	2	3	2	1	10			1	2	28	6		10		10	3		20	20	5	3
145199173532742	2	1.1031492	1	1	19	7	1	3	1		10			1	1	41	6		5		7	2		10	30	60	37
145199173533794	2	0.5165031	1	1	37	2	1	3	1	1	12			1	1	52	7		9		10	2		40	60	80	80
145199173538918	2	0.5230396	0	1	50	4	2	2	4	3	12			1	2	15	7		9		8	2		30		70
145199173555315	2	0.3779424	0	2	87	6	2	2	1	2	5			1	1	16	7		8		8	3		5	5		20
145199173555316	2	0.2901642	0	2	76	6	2	3	1	3	1			1	1	48	10				10
145199173571706	2	1.6794411	0	1	56	4	2	1	2	1	12			1	1	48	9		10		10			30		10
145199173574782	2	0.4970979	1	2	70	6	2	3	1	3	2			1	1	48	7		7		7	6		2	50	1	60
145199173642289	2	0.7621591	0	1	37	2	2	3	2	3	11			1	1	48	8		8		8	7		10	70	75	60
145199173975053	2	0.4687798	0	1	60	5	2	3	1	1	10			1	2	34	8		10		9	7				70	70
145199173981203	2	0.8219425	0	1	53	4	2	3	3	1	9			1	2	16	10		10		5	5					8
145199173985310	2	1.513866	1	2	23	1	2	2	1	1	9			1	1	32	6		7		7	5		3	35	40	25
145199173986336	2	0.9599256	1	1	38	2	2	3	3	3	13			1	1	16	8		9		8	5		10	75
145199173992486	2	0.7753382	1	1	58	4	2	3	5	3	9			1	2	16	6		9		8	6		45	60	30	60
145199174032435	2	0.9230719	0	2	42	3	2	1	2	1	4			1	1	52	0		5		1	10		10	90	20	8
145199174052927	2	0.4838598	1	2	68	5	1	3	1	3	13			1	1	12	2		4		4	2		15	20	10	5
145199174480912	2	0.5308597	0	1	18	7	1	3	1		12			1	1	16	3		9		8	3		40	20	70	75
145199174481939	2	3.4748318	1	1	79	6	2	1	1	3	9			1	1	16	5		7			5
145199174486043	2	0.3687484	0	2	41	3	2	3	2	3	3			1	1	4	5		5		5	5		1	50	50	60
145199174487076	2	0.38327	1	2	81	6	2	2	1		9			1	2	12	7		9		9			5	60	70	15
145199174487078	2	1.514273	1	1	45	3	1	2	2	3	9			1	1	52	4		10		10	4		2	40
145199174514737	2	0.2317969	0	1	80	6	1	2	1	3	2			1	1	28	4		10		5	4		5	10	5	20
145199174531135	2	0.6903646	1	1	26	1	2	3	2	3	10			1	1	24	2		9		5	2		20	20	50	10
145199174558805	2	0.457876	1	1	68	5	1	3	1	3	11			1	2	28	0		5		5	0		1		50	10
145199174756465	2	1.9651071	0	1	24	1	2	2	2	3	8			1	1	16	10		8		10	4					70
145199174785043	2	1.146493	0	1	21	1	1	2	1		13			1	1	44	0		8			8		20	70	40
145199174833182	2	0.4264244	0	2	70	6	2	3	1	2	1			1	1	48	5		8		10	5		10	50
145199174938730	2	0.8727598	0	1	22	1	2	3	1	1	9			1	1	48	9		9		7	10		7	90	80	50
145199174952992	2	0.2317969	0	1	35	2	2	3	2	3	9			2	2	48	10		10		9	9		80	30	50	75
145199174968362	2	0.3746021	1	2	77	6	2	2	1	2	2			1	2	24	8		9		6	9		30	70		15
145199174977587	2	0.7815036	1	2	57	4	2	1	2	3	11			1	1	20	5		9		10	6		2	50	30	10
145199175033936	2	1.193402	1	2	50	4	2	2	2	3	9			1	2	24	1		8		7	4		10	30	50	20
145199175052387	2	1.7208412	0	1	65	5	2	1	1	3	2			1	1	33	10		10		10	5		35	50	40	10
145199175161915	2	0.7985373	1	1	18	7	1	1	1		7			1	2	6	8
145199175504999	2	0.3355939	1	1	51	4	2	3	2	2	9			1	1	10	8		10		8	3		10	20		15
145199175510134	2	0.7710707	0	2	52	4	2	3	4		7			1	2	52	5		6		3	8		2	50	50	10
145199175523454	2	0.2470313	0	2	77	6	2	2	1	2	10			1	1	52	9		10		7	5		2
145199175536647	2	1.2460292	1	2	36	2	2	1	2	3	3			1	1	8	8		9		8					70	30
145199175587881	2	0.4484808	0	1	39	2	2	3	2	3	12			1	1	22	9		7		7	5		3	50	7
145199175594031	2	1.4399214	1	2	54	4	1	1	2	1	11			1	1	25	8		8		9	7
145199175866400	2	1.422021	0	1	47	3	2	1	2	3	12			1	1	20	8		9		7	7
145199175914599	2	0.6810959	1	2	25	1	2	1	5	1	9			2	2	19	3		2		3	3		5	68	63	5
145199175962737	2	0.7724379	1	2	34	2	2	3	2	1	7			1	2	32	9		9		9	9		5	90	9
145199176115269	2	0.590498	1	1	20	1	2	3	1	3	2			1	1	12	4		9		10	2		30	20	10	30
145199176383604	2	0.9788009	0	1	25	1	1	3	2		1			1	1	16	1				10	1		3	0	35	10
145212880169009	2	0.2943988	0	2	40	3	2	2	2	1	4			1	1	48	2		8		4	8		1	90	95	70
145212880191545	2	0.2490057	1	1	77	6	1	2	1		9			1	1	18	6		9		9	6			40
145212880218191	2	0.3459198	1	2	70	6	1	3	1	3	5			1	1	16	7		9		10	5		40	50	50
145212880256100	2	0.3871305	0	1	50	4	1	3	2	3	8			1	1	24	8		7		7	9		2	80	50	40
145212880335978	2	0.5609752	0	1	31	2	2	3	1	1	8			1	2	48	10		10		9	8		40	80	60	35
145212880406651	2	1.1398461	1	1	75	6	1	1	1	3	4			1	1	12	7		8		9	7		1	50	25	30
145212880585830	2	1.064258	0	2	24	1	2	2	5	1	3			1	1	48	4		8		10	5			30	30	15
145212880605191	2	1.9223648	1	1	42	3	1	1	2	1	12			1	1	28	2		6		7	5		35	60	60
145212880731138	2	0.6798908	1	1	65	5	2	2	1	2	10			1	2	16	6		9		9	5		10	10	20	20
145212880761887	2	1.6406356	1	2	23	1	2	3	2	3	7			1	2	24	3		7		4			1	50	60	66
145212880901224	2	0.5142401	0	1	43	3	1	3	2	1	1			1	1	17	8		8		8	5		3	50	2	20
145212880920701	2	0.9370805	0	1	44	3	2	3	2	3	10			1	1	30	5		10		10	4		15	20	50	70
145212880951301	2	0.980008	1	2	52	4	1	1	1	2	7			1	1	40	1		10		10	0
145212880955398	2	0.7710011	1	2	77	6	2	1	1	1	11			1	1	20	8		9		8	6		3	70	80
145212881019948	2	0.4877381	1	1	76	6	1	3	1	2	13			1	1	16	5		8		10	5		40	60	80	70
145212881232982	2	0.5355423	1	2	59	4	2	2	2	2	3			1	1	52	10		10		5	2		3	5	60	10
145212881232994	2	1.1591034	1	1	19	7	1	3	1		13			1	1	8	3		9		10	3		56	28		10
145212881232996	2	0.68446	1	2	28	1	2	3	1	3	9			1	1	41	2		8		5	2		3	5	45	8
145212881241197	2	1.9739444	0	1	69	5	2	1	1		12			1	1	28	10		10		10	5
145212881277975	2	0.6003541	1	1	49	3	2	3	1	3	1			1	1	48	8		8		9	8		15	50	50	50
145212881416247	2	0.9533079	1	2	39	2	2	2	2	2	13			1	1	24	5		5			5			50
145212881439839	2	0.3701471	0	2	43	3	2	3	2	3	9			1	2	48	7		9		8	7		1	80	70	80
145212881471603	2	0.5627078	0	2	29	1	2	3	2	3	5			1	1	20	8		7		7	6		40	60	75	75
145212881636464	2	2.5864289	1	2	22	1	1	2	5	1	9			1	1	24	7		9		9	6		1	50	60	10
145212881646647	2	0.7470546	0	2	32	2	2	3	2	1	4			1	1	24	7		7		9	8		5	75	60	60
145212881694828	2	3.4666268	0	2	49	3	2	1	1	1	4			1	1	48	8		7		10	6
145212881716342	2	2.1099807	1	1	49	3	1	1	2	1	8			1	1	24	10		10		10	5
145212881921115	2	0.2276914	1	2	25	1	2	2	2	1	8			1	1	4	4		5		7	4		5	40	20	6
145212881921119	2	4.9997556	1	2	40	3	2	1	4	1	7			1	2	52	8		10		7	8		25	20	25	7
145212881959037	2	0.7161084	0	2	23	1	2	3	1	3	13			1	1	17	0		6		7	0		8	30		1
145212882059309	2	0.3568191	0	1	69	5	1	3	1	3	9			1	1	28	4		8		8	3		5	15	40	20
145212882074645	2	1.0870367	0	1	51	4	2	1	2	3	9			1	2	0	5		5		9	9
145212882076703	2	0.5136511	1	2	51	4	2	3	2	1	5			1	1	21	3		8		8	1		6	15	3	18
145212882076706	2	0.4701766	0	1	50	4	2	3	3	3	8			1	2	27	8		8		5	7		3	50	50	15
145212882103353	2	0.5320456	0	1	70	6	2	2	1	2	9			1	2	48	8		10		7	4		5	80	50	30
145212882125899	2	0.2124921	0	2	21	1	2	2	2		1			1	1	6	9		10		8	1		2
145212882366495	2	0.2078612	0	2	75	6	1	2	1	3	11			1	1	52	5		8		8	5
145212882367524	2	0.2159621	1	1	75	6	1	2	1	3	2			1	1	28	4		10		10	5		5	70		30
145212882376746	2	0.7167241	0	1	35	2	2	3	2	2	2			1	1	24	7		10		9	5		20	70	70	20
145212882385973	2	0.1931035	1	2	41	3	2	1	2	3	9			1	2	52	5		9		8	6		3	50	40	10
145212882391096	2	0.3568191	1	1	66	5	1	2	1	1	9			1	1	48	10		10		10	10			75
145212882391098	2	0.1999902	1	1	41	3	2	3	3	3	4			1	2	52	6		8		7	6		2	50
145212882600982	2	1.4764402	0	1	42	3	2	1	4	1	12			1	2	48	0		9		2	3		1	10	20	65
145212882600987	2	0.9358833	0	1	51	4	1	3	5	1	9			1	2	8	4				4			2	50	80	20
145212882610214	2	0.3466639	0	2	76	6	2	2	1	2	9			1	1	26	8		8		6	9		7		70	75
145212882653241	2	0.9854702	0	1	66	5	2	3	1	3	10			1	1	41	9		10		6	4				50
145212883234900	2	2.7597923	1	1	23	1	1	2	3		13			1	2	22	5		8			4		30		15	30
145212883263511	2	0.2006235	1	2	41	3	2	2	4	2	11			2	2	26	8		8		8	7		5	20	30	20
145212883335182	2	1.4138485	0	2	35	2	2	2	2	2	9			1	1	26	5		4		8	4		20	50	60
145212883339357	2	1.1242509	1	2	52	4	2	1	2	1	10			1	1	40	6		8		9	8		18	60		75
145212883385464	2	0.9201721	0	1	61	5	2	3	4		13			1	1	13	10		7		8	10		15	50		30
145212883401728	2	0.5255379	1	2	63	5	2	3	3	3	13			1	1	27	8		9		10	9		2		40	20
145212883531823	2	3.8323635	0	1	33	2	1	3	5	1	3			1	1	52	5		8		7	3		14	15	70	10
145212883574784	2	1.6033637	0	1	66	5	1	1	1	1	2			1	1	28	10		7		9	5					12
145212883594307	2	0.6821382	0	1	28	1	2	3	5	1	7			1	1	12	2		9		3	2		2	10	70	80
145212883657853	2	1.2170897	1	2	37	2	2	2	4	1	13			1	2	52	10		10		6	10		1	9	60	80
145212883839074	2	0.3698628	1	2	61	5	2	3	1	2	7			1	2	52	5		8		2	8		2	80	80	80
145212883876984	2	1.0276948	0	1	30	2	2	2	2	3	9			1	1	24	2		7		5	2		9	20
145212883886083	2	0.3626149	1	1	52	4	2	3	2	3	12			1	2	8	2		8		7	9		1	80	50	45
145212883936306	2	0.7060772	1	1	30	2	2	3	2	1	7			1	1	26	7		10		9	9		8	75	50	5
145212883975180	2	1.3591853	1	1	53	4	2	1	1	1	7			1	1	28	8		9		8	5			50	50
145212884022388	2	0.5172122	1	2	30	2	1	3	2	3	9			1	1	30	2		7		4	2		10	20	50	5
145212884056170	2	0.6063444	1	1	60	5	2	1	2	3	3			1	2	44	9		9		10	8
145212884062317	2	0.5817993	0	1	54	4	1	3	5	2	2			1	1	52	8		8		5	5		3		3	15
145212884122639	2	1.4070633	1	2	23	1	1	3	5	1	5			1	1	12	6		5			5
145212884209723	2	0.3441638	1	2	52	4	2	3	2	3	11			1	1	34	7		9		7	5		1
145212884379680	2	0.5662828	1	1	35	2	2	3	2	1	8			1	1	20	10		10		10	10		5	50	60	90
145212884392045	2	0.3515233	0	2	51	4	2	3	2	3	12			1	1	52	0		8		8	5		1	50	30	30
145212884392047	2	1.0327431	0	2	44	3	2	2	4	2	9			1	1	16	8		6		8	7		3		50
145212884452382	2	0.3311778	1	2	36	2	2	3	2	1	3			1	1	48	7		7		7	8
145212884560950	2	0.9337313	0	1	43	3	2	3	2	1	2			1	2	20	4		3		1	5		5	45	50	30
145212884700271	2	1.4096088	1	1	32	2	2	2	4	1	13			1	2	48	9		10		8	6		1	30	50	8
145212884718716	2	1.285528	1	1	50	4	2	1	2	1	3			1	1	26	10		10		10	10		10	70	20	60
145212884821080	2	0.6810959	1	2	18	7	1	3	1		9			1	1	2	6		7		8	1			10	10
145212884829225	2	0.8097907	0	1	41	3	2	3	2	3	1			1	1	24	5		9		9	5		3	5		5
145212884829236	2	0.9196755	1	1	54	4	2	1	2	1	8			1	2	33	10		10		9	7		15	70	80	40
145212884907092	2	1.4493084	1	1	30	2	2	1	2		10			1	1	20	5		7		9	6		35	50	50	60
145212884908119	2	0.5019078	1	1	70	6	1	3	1	3	4			1	1	43	10		10		10	8					35
145212884912220	2	0.3580653	0	1	42	3	2	3	1	1	8			1	1	4	7		7		7	0		0	10	40	20
145212885045368	2	0.9749348	0	2	47	3	2	1	2	1	8			1	1	44	10		10		10	9					20
145212885045369	2	0.4347843	1	1	49	3	1	2	1	2	1			1	2	52	10		10		10	5		80	50	20	80
145212885146704	2	0.2099767	1	2	78	6	1	2	1	1	1			1	1	8	2		8			2		32		20	2
145212885262448	2	1.7484566	0	1	55	4	1	1	2	3	9			1	2	28	5		10		8	5
145212885286014	2	0.5709515	0	2	46	3	1	3	3		8			1	1	6	0		5		7	1		15	2
145212885291008	2	3.432514	1	1	34	2	2	1	5	1	11			1	1	28	8					6
145212885296131	2	1.3171371	1	2	68	5	2	1	1	1	2			1	1	52	5		8		9	5		10	50	40	25
145212885296133	2	0.750929	1	1	51	4	2	3	3	2	8			1	2	43	9		9		9	9		5	75	50	6
145212885299206	2	0.5345895	0	2	54	4	1	3	2	2	7			1	1	20	8		6		8	8		8	50	25	15
145212885313550	2	0.6752668	1	1	27	1	2	3	2	1	5			1	1	38	2		5		5	3		30	25
145212885324825	2	0.38327	0	2	76	6	2	2	1	2	9			1	2	52	8		9		6	10		5	70	50	28
145212885358685	2	0.6793514	1	2	19	7	2	3	1	3	3			1	2	52	2		4		3	2		4	16	25	25
145212885477426	2	0.2058806	1	1	37	2	2	3	2	1	10			1	1	20	10		9		10	7		47			15
145212885478468	2	0.9027087	0	1	35	2	1	3	2	1	9			1	1	12	7		10		8	7		2		60	5
145212885483604	2	0.7446283	0	2	64	5	2	2	2	2	7			1	1	24	8		9		6	8		5	80	45	35
145212885505140	2	0.7931199	0	2	53	4	2	2	2	2	3			1	1	20	6		8		7	8		1	50	30	30
145212885520391	2	0.4149269	1	1	49	3	2	3	2	3	4			1	2	48	8		10		8	4		10	30	40	30
145212885524497	2	0.1999902	1	2	25	1	1	3	2	1	9			2	2	36	0		3		6	3		25
145212885525532	2	0.1931775	0	1	35	2	2	2	2	3	8			1	1	48	5		3		10	3		3	55	50	15
145212885722114	2	0.2108971	0	1	51	4	2	3	2	1	13			1	1	26	4		5		7	4		1		20	10
145212885725242	2	1.6011618	0	1	27	1	2	1	3	1	5			1	1	20	8		8		10	8		85	60	40	60
145212885742697	2	0.9755744	1	1	41	3	2	3	2	3	11			1	2	36	7		9		8	5		10		60	35
145212885764218	2	0.5068434	1	1	44	3	2	3	1	1	2			1	1	18	5		8		8	6		25		50	40
145212885774337	2	0.5012412	0	2	46	3	2	3	3		1			1	2	52	5		8		8	5		10			25
145212885776387	2	0.5252392	0	2	49	3	1	3	1	3	1			1	2	26	5		10		8	5		5
145212885952586	2	0.930253	0	2	42	3	1	3	2		9			1	1	8	2		8		9	0		3	5	20	10
145212886005847	2	0.3127114	1	1	66	5	2	2	1	2	9			1	2	8	8		10		7	8		0			50
145212886029411	2	0.6330286	0	1	36	2	1	3	3	3	7			1	2	48	7		7		8	9		5	95	50	15
145212886043755	2	0.6525656	0	2	66	5	1	3	1	3	13			1	2	17	6		7		6	8		3	80	60	30
145212886058102	2	3.086307	0	1	53	4	1	1	1	1	12			1	2	52	3		8		7	3
145212886208522	2	0.2176819	1	1	39	2	2	3	2	1	11			1	1	40	8		7		8	8		10	80	25	20
145212886209580	2	0.6038982	1	1	28	1	2	3	2	3	2			1	2	24	7		7		7	7		8	70	85	17
145212886209581	2	0.8197488	1	1	40	3	2	3	1	1	6			1	1	12	5		5		7	2		1
145212886227004	2	2.6463679	1	1	50	4	1	3	1	1	10			1	2	21	4		7		8	2		15		2	30
145212886227006	2	0.9162275	0	2	55	4	1	2	3	1	9			1	2	20	2		4		1	4
145212886237267	2	0.6639831	0	2	36	2	2	2	2	2	7			1	2	52	8		9		8	9		5	85	60	35
145212886248548	2	0.4057501	1	2	75	6	2	2	1	3	1			1	1	28	4		8		9	3		2	20	50	15
145212886333557	2	2.3073828	1	1	34	2	2	3	4	3	11			1	1	12	7		10		10	10		3	20
145212886553613	2	0.7990423	1	2	50	4	2	1	2	3	7			1	1	52	6		8		9	7		3	50	50	15
145212886560793	2	1.1886497	0	2	51	4	1	3	3	1	11			1	2	52	8		9		9	7		12	70	80	80
145212886593624	2	0.2000006	1	2	55	4	1	3	2	1	9			1	1	52	7		10		10	7		5	50	75	65
145212886612080	2	0.7001721	0	2	34	2	1	3	3	3	8			1	2	48	7		9		9	7		5	70	50	30
145212886637603	2	0.6242522	0	2	42	3	2	3	2	3	7			1	1	36	7		7		8	8		30	75	60	10
145212886651954	2	0.2484914	0	1	26	1	2	3	2	3	7			1	1	52	5		10		8	3		5	20	40	2
145212886714389	2	1.0853965	1	2	22	1	1	3	2	3	2			1	2	52	7		7		9	7		2	50	10	30
145212886714390	2	0.2058806	1	1	41	3	2	2	3	3	1			1	1	40	8		9		9	8		20	80	10	12
145212886723615	2	2.8643236	0	1	75	6	2	1	1	1	1			1	1	52	9		10		10	6			50	80	20
145212886751279	2	0.3588659	1	2	28	1	2	3	3	3	7			1	1	8	3		6		7	7		20	15	60	15
145212886779977	2	0.1999925	0	2	36	2	2	3	2	1	7			1	1	52	1		7		2	5		2	60	65	60
145212886788188	2	0.8095554	0	1	24	1	2	3	2	3	8			1	1	24	3		8		5	3		2	100	80	60
145212886880337	2	0.9572055	0	1	29	1	2	1	1	1	5			1	1	28	2		6		10	8		20	50	2
145212886885477	2	0.2469145	0	2	75	6	2	3	1	3	7			1	1	24	5		2		7	5		1			20
[truncated: 9 more rows]
