# Supplementary material for: Beliefs and Risk Perceptions About COVID-19: Evidence From Two Successive French Representative Surveys During Lockdown
Source: Front Psychol. 2021 Feb 1;12:619145. doi: 10.3389/fpsyg.2021.619145 (PMC7882490; doi:10.3389/fpsyg.2021.619145)
Supplement: Supplementary file 2 [file Data_Sheet_1.ZIP › donnees-hospitalieres-classe-age-covid19-2020-08-16-19h00.csv]

reg	cl_age90	jour	hosp	rea	rad	dc
01	0	2020-03-18	0	0	0	0
01	9	2020-03-18	0	0	0	0
01	19	2020-03-18	0	0	0	0
01	29	2020-03-18	0	0	0	0
01	39	2020-03-18	0	0	0	0
01	49	2020-03-18	0	0	0	0
01	59	2020-03-18	0	0	0	0
01	69	2020-03-18	0	0	0	0
01	79	2020-03-18	0	0	0	0
01	89	2020-03-18	0	0	0	0
01	90	2020-03-18	0	0	0	0
02	0	2020-03-18	16	5	0	1
02	9	2020-03-18	0	0	0	0
02	19	2020-03-18	0	0	0	0
02	29	2020-03-18	2	1	0	0
02	39	2020-03-18	2	0	0	0
02	49	2020-03-18	2	1	0	0
02	59	2020-03-18	5	0	0	0
02	69	2020-03-18	4	3	0	0
02	79	2020-03-18	1	0	0	0
02	89	2020-03-18	0	0	0	1
02	90	2020-03-18	0	0	0	0
03	0	2020-03-18	0	0	0	0
03	9	2020-03-18	0	0	0	0
03	19	2020-03-18	0	0	0	0
03	29	2020-03-18	0	0	0	0
03	39	2020-03-18	0	0	0	0
03	49	2020-03-18	0	0	0	0
03	59	2020-03-18	0	0	0	0
03	69	2020-03-18	0	0	0	0
03	79	2020-03-18	0	0	0	0
03	89	2020-03-18	0	0	0	0
03	90	2020-03-18	0	0	0	0
04	0	2020-03-18	2	2	0	0
04	9	2020-03-18	0	0	0	0
04	19	2020-03-18	0	0	0	0
04	29	2020-03-18	0	0	0	0
04	39	2020-03-18	0	0	0	0
04	49	2020-03-18	0	0	0	0
04	59	2020-03-18	0	0	0	0
04	69	2020-03-18	0	0	0	0
04	79	2020-03-18	1	1	0	0
04	89	2020-03-18	1	1	0	0
04	90	2020-03-18	0	0	0	0
06	0	2020-03-18	0	0	0	0
06	9	2020-03-18	0	0	0	0
06	19	2020-03-18	0	0	0	0
06	29	2020-03-18	0	0	0	0
06	39	2020-03-18	0	0	0	0
06	49	2020-03-18	0	0	0	0
06	59	2020-03-18	0	0	0	0
06	69	2020-03-18	0	0	0	0
06	79	2020-03-18	0	0	0	0
06	89	2020-03-18	0	0	0	0
06	90	2020-03-18	0	0	0	0
11	0	2020-03-18	957	294	129	36
11	9	2020-03-18	3	2	1	0
11	19	2020-03-18	6	1	0	0
11	29	2020-03-18	11	2	18	0
11	39	2020-03-18	42	13	16	0
11	49	2020-03-18	89	27	11	4
11	59	2020-03-18	177	67	30	0
11	69	2020-03-18	185	73	18	2
11	79	2020-03-18	200	70	18	8
11	89	2020-03-18	168	30	12	16
11	90	2020-03-18	63	4	3	4
24	0	2020-03-18	14	5	0	1
24	9	2020-03-18	0	0	0	0
24	19	2020-03-18	0	0	0	0
24	29	2020-03-18	0	0	0	0
24	39	2020-03-18	0	0	0	0
24	49	2020-03-18	0	0	0	0
24	59	2020-03-18	3	0	0	0
24	69	2020-03-18	3	1	0	0
24	79	2020-03-18	3	2	0	1
24	89	2020-03-18	4	2	0	0
24	90	2020-03-18	1	0	0	0
27	0	2020-03-18	168	33	20	6
27	9	2020-03-18	0	0	0	0
27	19	2020-03-18	0	0	1	0
27	29	2020-03-18	1	0	3	0
27	39	2020-03-18	4	1	3	0
27	49	2020-03-18	9	1	2	0
27	59	2020-03-18	17	2	3	0
27	69	2020-03-18	32	10	1	0
27	79	2020-03-18	41	13	0	1
27	89	2020-03-18	50	6	5	3
27	90	2020-03-18	14	0	2	2
28	0	2020-03-18	45	4	6	3
28	9	2020-03-18	0	0	0	0
28	19	2020-03-18	0	0	0	0
28	29	2020-03-18	1	0	0	0
28	39	2020-03-18	1	0	0	0
28	49	2020-03-18	3	0	0	0
28	59	2020-03-18	4	0	2	0
28	69	2020-03-18	8	2	3	1
28	79	2020-03-18	15	2	1	1
28	89	2020-03-18	10	0	0	1
28	90	2020-03-18	3	0	0	0
32	0	2020-03-18	313	87	77	21
32	9	2020-03-18	10	0	10	0
32	19	2020-03-18	4	1	2	0
32	29	2020-03-18	7	2	7	0
32	39	2020-03-18	14	4	12	0
32	49	2020-03-18	16	3	13	0
32	59	2020-03-18	37	13	10	0
32	69	2020-03-18	55	25	7	3
32	79	2020-03-18	73	31	7	6
32	89	2020-03-18	65	8	8	10
32	90	2020-03-18	32	0	1	2
44	0	2020-03-18	879	204	146	120
44	9	2020-03-18	4	0	30	0
44	19	2020-03-18	4	2	1	0
44	29	2020-03-18	12	1	2	1
44	39	2020-03-18	22	6	5	0
44	49	2020-03-18	41	14	12	1
44	59	2020-03-18	92	30	26	3
44	69	2020-03-18	181	69	21	9
44	79	2020-03-18	206	58	21	21
44	89	2020-03-18	197	22	17	53
44	90	2020-03-18	76	0	4	32
52	0	2020-03-18	44	4	36	1
52	9	2020-03-18	0	0	0	0
52	19	2020-03-18	0	0	0	0
52	29	2020-03-18	2	0	6	0
52	39	2020-03-18	2	0	2	0
52	49	2020-03-18	2	1	9	0
52	59	2020-03-18	6	0	7	0
52	69	2020-03-18	8	1	9	0
52	79	2020-03-18	9	1	2	0
52	89	2020-03-18	10	1	1	0
52	90	2020-03-18	5	0	0	1
53	0	2020-03-18	60	23	69	7
53	9	2020-03-18	0	0	0	0
53	19	2020-03-18	0	0	1	0
53	29	2020-03-18	0	0	2	0
53	39	2020-03-18	3	0	4	0
53	49	2020-03-18	0	0	6	0
53	59	2020-03-18	4	2	10	0
53	69	2020-03-18	11	2	19	0
53	79	2020-03-18	19	11	18	0
53	89	2020-03-18	22	8	7	2
53	90	2020-03-18	1	0	2	5
75	0	2020-03-18	41	12	11	2
75	9	2020-03-18	0	0	0	0
75	19	2020-03-18	0	0	1	0
75	29	2020-03-18	2	2	0	0
75	39	2020-03-18	1	0	2	0
75	49	2020-03-18	3	1	0	0
75	59	2020-03-18	2	1	3	0
75	69	2020-03-18	11	4	2	0
75	79	2020-03-18	8	2	1	0
75	89	2020-03-18	9	2	0	1
75	90	2020-03-18	4	0	1	1
76	0	2020-03-18	95	39	51	6
76	9	2020-03-18	2	0	2	0
76	19	2020-03-18	0	0	3	0
76	29	2020-03-18	2	0	3	0
76	39	2020-03-18	3	0	8	0
76	49	2020-03-18	3	1	8	0
76	59	2020-03-18	13	5	13	1
76	69	2020-03-18	24	13	3	0
76	79	2020-03-18	29	14	10	1
76	89	2020-03-18	17	6	1	4
76	90	2020-03-18	1	0	0	0
84	0	2020-03-18	172	35	69	7
84	9	2020-03-18	1	0	1	0
84	19	2020-03-18	0	0	2	0
84	29	2020-03-18	3	0	7	0
84	39	2020-03-18	4	0	14	1
84	49	2020-03-18	11	3	6	0
84	59	2020-03-18	18	8	9	0
84	69	2020-03-18	24	9	19	1
84	79	2020-03-18	51	13	6	2
84	89	2020-03-18	41	2	4	3
84	90	2020-03-18	11	0	1	0
93	0	2020-03-18	166	24	202	7
93	9	2020-03-18	0	0	5	0
93	19	2020-03-18	6	0	14	0
93	29	2020-03-18	7	1	28	0
93	39	2020-03-18	14	0	23	0
93	49	2020-03-18	22	1	40	0
93	59	2020-03-18	29	4	39	0
93	69	2020-03-18	38	8	26	1
93	79	2020-03-18	29	8	20	1
93	89	2020-03-18	15	2	7	4
93	90	2020-03-18	6	0	0	1
94	0	2020-03-18	0	0	0	0
94	9	2020-03-18	0	0	0	0
94	19	2020-03-18	0	0	0	0
94	29	2020-03-18	0	0	0	0
94	39	2020-03-18	0	0	0	0
94	49	2020-03-18	0	0	0	0
94	59	2020-03-18	0	0	0	0
94	69	2020-03-18	0	0	0	0
94	79	2020-03-18	0	0	0	0
94	89	2020-03-18	0	0	0	0
94	90	2020-03-18	0	0	0	0
01	0	2020-03-19	0	0	0	0
01	9	2020-03-19	0	0	0	0
01	19	2020-03-19	0	0	0	0
01	29	2020-03-19	0	0	0	0
01	39	2020-03-19	0	0	0	0
01	49	2020-03-19	0	0	0	0
01	59	2020-03-19	0	0	0	0
01	69	2020-03-19	0	0	0	0
01	79	2020-03-19	0	0	0	0
01	89	2020-03-19	0	0	0	0
01	90	2020-03-19	0	0	0	0
02	0	2020-03-19	17	5	0	1
02	9	2020-03-19	0	0	0	0
02	19	2020-03-19	0	0	0	0
02	29	2020-03-19	2	1	0	0
02	39	2020-03-19	2	0	0	0
02	49	2020-03-19	3	1	0	0
02	59	2020-03-19	5	0	0	0
02	69	2020-03-19	4	3	0	0
02	79	2020-03-19	1	0	0	0
02	89	2020-03-19	0	0	0	1
02	90	2020-03-19	0	0	0	0
03	0	2020-03-19	0	0	0	0
03	9	2020-03-19	0	0	0	0
03	19	2020-03-19	0	0	0	0
03	29	2020-03-19	0	0	0	0
03	39	2020-03-19	0	0	0	0
03	49	2020-03-19	0	0	0	0
03	59	2020-03-19	0	0	0	0
03	69	2020-03-19	0	0	0	0
03	79	2020-03-19	0	0	0	0
03	89	2020-03-19	0	0	0	0
03	90	2020-03-19	0	0	0	0
04	0	2020-03-19	2	2	0	0
04	9	2020-03-19	0	0	0	0
04	19	2020-03-19	0	0	0	0
04	29	2020-03-19	0	0	0	0
04	39	2020-03-19	0	0	0	0
04	49	2020-03-19	0	0	0	0
04	59	2020-03-19	0	0	0	0
04	69	2020-03-19	0	0	0	0
04	79	2020-03-19	1	1	0	0
04	89	2020-03-19	1	1	0	0
04	90	2020-03-19	0	0	0	0
06	0	2020-03-19	0	0	0	0
06	9	2020-03-19	0	0	0	0
06	19	2020-03-19	0	0	0	0
06	29	2020-03-19	0	0	0	0
06	39	2020-03-19	0	0	0	0
06	49	2020-03-19	0	0	0	0
06	59	2020-03-19	0	0	0	0
06	69	2020-03-19	0	0	0	0
06	79	2020-03-19	0	0	0	0
06	89	2020-03-19	0	0	0	0
06	90	2020-03-19	0	0	0	0
11	0	2020-03-19	1482	410	251	73
11	9	2020-03-19	6	2	5	0
11	19	2020-03-19	5	2	2	0
11	29	2020-03-19	22	4	27	0
11	39	2020-03-19	80	22	33	0
11	49	2020-03-19	144	42	24	4
11	59	2020-03-19	249	98	57	2
11	69	2020-03-19	283	93	41	8
11	79	2020-03-19	301	92	30	19
11	89	2020-03-19	251	46	22	30
11	90	2020-03-19	102	3	7	6
24	0	2020-03-19	37	11	3	1
24	9	2020-03-19	0	0	0	0
24	19	2020-03-19	0	0	0	0
24	29	2020-03-19	1	0	0	0
24	39	2020-03-19	0	0	0	0
24	49	2020-03-19	1	0	1	0
24	59	2020-03-19	2	1	2	0
24	69	2020-03-19	10	3	0	0
24	79	2020-03-19	10	5	0	1
24	89	2020-03-19	10	2	0	0
24	90	2020-03-19	3	0	0	0
27	0	2020-03-19	217	63	55	19
27	9	2020-03-19	0	0	0	0
27	19	2020-03-19	0	0	1	0
27	29	2020-03-19	1	1	6	0
27	39	2020-03-19	5	1	5	0
27	49	2020-03-19	13	2	4	0
27	59	2020-03-19	25	11	12	1
27	69	2020-03-19	46	21	2	1
27	79	2020-03-19	50	17	5	5
27	89	2020-03-19	56	10	13	9
27	90	2020-03-19	21	0	6	3
28	0	2020-03-19	54	11	11	5
28	9	2020-03-19	0	0	0	0
28	19	2020-03-19	0	0	0	0
28	29	2020-03-19	1	0	0	0
28	39	2020-03-19	1	0	0	0
28	49	2020-03-19	2	0	2	0
28	59	2020-03-19	5	1	3	0
28	69	2020-03-19	11	5	4	1
28	79	2020-03-19	17	3	1	1
28	89	2020-03-19	13	2	1	2
28	90	2020-03-19	4	0	0	1
32	0	2020-03-19	417	116	140	46
32	9	2020-03-19	12	0	14	0
32	19	2020-03-19	5	1	3	0
32	29	2020-03-19	13	2	10	0
32	39	2020-03-19	14	4	25	0
32	49	2020-03-19	25	4	21	0
32	59	2020-03-19	45	20	22	0
32	69	2020-03-19	70	31	11	6
32	79	2020-03-19	91	45	17	14
32	89	2020-03-19	102	8	12	21
32	90	2020-03-19	38	0	2	5
44	0	2020-03-19	1196	259	221	158
44	9	2020-03-19	7	0	33	0
44	19	2020-03-19	2	2	3	0
44	29	2020-03-19	11	1	11	1
44	39	2020-03-19	27	9	14	0
44	49	2020-03-19	53	19	18	2
44	59	2020-03-19	131	47	34	4
44	69	2020-03-19	245	84	31	13
44	79	2020-03-19	285	72	34	28
44	89	2020-03-19	287	20	26	74
44	90	2020-03-19	101	0	9	34
52	0	2020-03-19	66	14	54	1
52	9	2020-03-19	0	0	0	0
52	19	2020-03-19	0	0	0	0
52	29	2020-03-19	1	0	7	0
52	39	2020-03-19	1	0	3	0
52	49	2020-03-19	4	1	14	0
52	59	2020-03-19	6	2	10	0
52	69	2020-03-19	14	4	12	0
52	79	2020-03-19	18	4	5	0
52	89	2020-03-19	14	3	3	0
52	90	2020-03-19	7	0	0	1
53	0	2020-03-19	83	25	52	10
53	9	2020-03-19	0	0	2	0
53	19	2020-03-19	0	0	0	0
53	29	2020-03-19	0	0	3	0
53	39	2020-03-19	5	2	3	0
53	49	2020-03-19	2	0	1	0
53	59	2020-03-19	9	4	10	0
53	69	2020-03-19	13	0	13	1
53	79	2020-03-19	23	12	15	0
53	89	2020-03-19	27	7	4	5
53	90	2020-03-19	3	0	1	4
75	0	2020-03-19	59	12	21	3
75	9	2020-03-19	0	0	0	0
75	19	2020-03-19	0	0	1	0
75	29	2020-03-19	2	1	3	0
75	39	2020-03-19	3	0	3	0
75	49	2020-03-19	3	1	0	0
75	59	2020-03-19	7	2	4	1
75	69	2020-03-19	11	3	5	0
75	79	2020-03-19	11	3	3	0
75	89	2020-03-19	16	2	0	1
75	90	2020-03-19	5	0	1	1
76	0	2020-03-19	145	59	68	17
76	9	2020-03-19	1	0	7	0
76	19	2020-03-19	0	0	4	0
76	29	2020-03-19	2	0	5	1
76	39	2020-03-19	4	0	9	0
76	49	2020-03-19	7	4	7	0
76	59	2020-03-19	17	8	17	1
76	69	2020-03-19	34	18	4	1
76	79	2020-03-19	50	22	13	4
76	89	2020-03-19	23	6	2	9
76	90	2020-03-19	5	1	0	1
84	0	2020-03-19	408	74	145	28
84	9	2020-03-19	2	1	1	0
84	19	2020-03-19	0	0	2	0
84	29	2020-03-19	3	0	11	0
84	39	2020-03-19	11	0	17	1
84	49	2020-03-19	16	2	14	0
84	59	2020-03-19	32	11	23	1
84	69	2020-03-19	55	19	24	1
84	79	2020-03-19	109	32	33	5
84	89	2020-03-19	119	7	12	12
84	90	2020-03-19	54	0	8	8
93	0	2020-03-19	224	47	261	9
93	9	2020-03-19	1	0	5	0
93	19	2020-03-19	4	0	17	0
93	29	2020-03-19	4	1	38	0
93	39	2020-03-19	17	0	28	0
93	49	2020-03-19	26	4	50	0
93	59	2020-03-19	43	8	51	0
93	69	2020-03-19	48	9	35	1
93	79	2020-03-19	47	19	24	1
93	89	2020-03-19	25	5	12	6
93	90	2020-03-19	9	1	1	1
94	0	2020-03-19	54	14	10	1
94	9	2020-03-19	0	0	0	0
94	19	2020-03-19	0	0	0	0
94	29	2020-03-19	0	0	0	0
94	39	2020-03-19	1	0	1	0
94	49	2020-03-19	2	0	3	0
94	59	2020-03-19	4	3	1	0
94	69	2020-03-19	11	5	1	0
94	79	2020-03-19	17	4	1	0
94	89	2020-03-19	15	1	1	0
94	90	2020-03-19	3	0	1	1
01	0	2020-03-20	0	0	0	0
01	9	2020-03-20	0	0	0	0
01	19	2020-03-20	0	0	0	0
01	29	2020-03-20	0	0	0	0
01	39	2020-03-20	0	0	0	0
01	49	2020-03-20	0	0	0	0
01	59	2020-03-20	0	0	0	0
01	69	2020-03-20	0	0	0	0
01	79	2020-03-20	0	0	0	0
01	89	2020-03-20	0	0	0	0
01	90	2020-03-20	0	0	0	0
02	0	2020-03-20	19	5	0	1
02	9	2020-03-20	0	0	0	0
02	19	2020-03-20	0	0	0	0
02	29	2020-03-20	2	1	0	0
02	39	2020-03-20	3	0	0	0
02	49	2020-03-20	3	1	0	0
02	59	2020-03-20	6	0	0	0
02	69	2020-03-20	4	3	0	0
02	79	2020-03-20	1	0	0	0
02	89	2020-03-20	0	0	0	1
02	90	2020-03-20	0	0	0	0
03	0	2020-03-20	0	0	0	0
03	9	2020-03-20	0	0	0	0
03	19	2020-03-20	0	0	0	0
03	29	2020-03-20	0	0	0	0
03	39	2020-03-20	0	0	0	0
03	49	2020-03-20	0	0	0	0
03	59	2020-03-20	0	0	0	0
03	69	2020-03-20	0	0	0	0
03	79	2020-03-20	0	0	0	0
03	89	2020-03-20	0	0	0	0
03	90	2020-03-20	0	0	0	0
04	0	2020-03-20	2	2	0	0
04	9	2020-03-20	0	0	0	0
04	19	2020-03-20	0	0	0	0
04	29	2020-03-20	0	0	0	0
04	39	2020-03-20	0	0	0	0
04	49	2020-03-20	0	0	0	0
04	59	2020-03-20	0	0	0	0
04	69	2020-03-20	0	0	0	0
04	79	2020-03-20	1	1	0	0
04	89	2020-03-20	1	1	0	0
04	90	2020-03-20	0	0	0	0
06	0	2020-03-20	0	0	0	0
06	9	2020-03-20	0	0	0	0
06	19	2020-03-20	0	0	0	0
06	29	2020-03-20	0	0	0	0
06	39	2020-03-20	0	0	0	0
06	49	2020-03-20	0	0	0	0
06	59	2020-03-20	0	0	0	0
06	69	2020-03-20	0	0	0	0
06	79	2020-03-20	0	0	0	0
06	89	2020-03-20	0	0	0	0
06	90	2020-03-20	0	0	0	0
11	0	2020-03-20	1785	484	350	99
11	9	2020-03-20	9	2	6	0
11	19	2020-03-20	7	2	2	0
11	29	2020-03-20	27	6	31	0
11	39	2020-03-20	100	29	49	0
11	49	2020-03-20	170	48	35	4
11	59	2020-03-20	304	121	72	3
11	69	2020-03-20	340	117	58	11
11	79	2020-03-20	359	104	47	27
11	89	2020-03-20	297	46	38	41
11	90	2020-03-20	130	3	9	9
24	0	2020-03-20	58	13	2	2
24	9	2020-03-20	0	0	0	0
24	19	2020-03-20	0	0	0	0
24	29	2020-03-20	1	0	0	0
24	39	2020-03-20	1	0	0	0
24	49	2020-03-20	2	0	0	0
24	59	2020-03-20	5	2	2	0
24	69	2020-03-20	16	4	0	0
24	79	2020-03-20	16	6	0	1
24	89	2020-03-20	11	1	0	1
24	90	2020-03-20	6	0	0	0
27	0	2020-03-20	270	71	68	22
27	9	2020-03-20	0	0	0	0
27	19	2020-03-20	0	0	1	0
27	29	2020-03-20	2	1	8	0
27	39	2020-03-20	6	1	6	0
27	49	2020-03-20	13	3	6	0
27	59	2020-03-20	30	12	13	1
27	69	2020-03-20	61	22	4	1
27	79	2020-03-20	60	19	8	7
27	89	2020-03-20	69	13	14	10
27	90	2020-03-20	29	0	7	3
28	0	2020-03-20	71	13	14	7
28	9	2020-03-20	0	0	0	0
28	19	2020-03-20	0	0	0	0
28	29	2020-03-20	1	0	2	0
28	39	2020-03-20	2	1	0	0
28	49	2020-03-20	4	0	2	0
28	59	2020-03-20	8	1	4	0
28	69	2020-03-20	13	6	4	1
28	79	2020-03-20	21	3	1	1
28	89	2020-03-20	17	2	1	4
28	90	2020-03-20	5	0	0	1
32	0	2020-03-20	432	136	156	51
32	9	2020-03-20	7	0	19	0
32	19	2020-03-20	4	1	5	0
32	29	2020-03-20	15	1	11	0
32	39	2020-03-20	19	7	26	0
32	49	2020-03-20	28	6	25	0
32	59	2020-03-20	48	23	23	0
32	69	2020-03-20	78	42	10	7
32	79	2020-03-20	97	45	14	17
32	89	2020-03-20	103	10	13	23
32	90	2020-03-20	32	0	7	4
44	0	2020-03-20	1364	294	284	183
44	9	2020-03-20	7	0	40	0
44	19	2020-03-20	1	1	5	0
44	29	2020-03-20	13	1	15	0
44	39	2020-03-20	34	10	16	0
44	49	2020-03-20	67	23	21	2
44	59	2020-03-20	146	50	44	5
44	69	2020-03-20	279	93	40	14
44	79	2020-03-20	339	91	42	33
44	89	2020-03-20	309	19	34	87
44	90	2020-03-20	111	0	13	40
52	0	2020-03-20	73	17	62	1
52	9	2020-03-20	0	0	0	0
52	19	2020-03-20	0	0	0	0
52	29	2020-03-20	0	0	8	0
52	39	2020-03-20	0	0	4	0
52	49	2020-03-20	4	1	15	0
52	59	2020-03-20	8	2	11	0
52	69	2020-03-20	16	5	15	0
52	79	2020-03-20	21	6	5	0
52	89	2020-03-20	15	3	4	0
52	90	2020-03-20	8	0	0	1
53	0	2020-03-20	94	25	55	12
53	9	2020-03-20	0	0	2	0
53	19	2020-03-20	0	0	0	0
53	29	2020-03-20	1	0	3	0
53	39	2020-03-20	4	2	4	0
53	49	2020-03-20	2	0	1	0
53	59	2020-03-20	10	4	10	0
53	69	2020-03-20	15	0	14	1
53	79	2020-03-20	24	12	16	1
53	89	2020-03-20	30	7	4	6
53	90	2020-03-20	7	0	1	4
75	0	2020-03-20	65	15	31	4
75	9	2020-03-20	0	0	0	0
75	19	2020-03-20	0	0	1	0
75	29	2020-03-20	3	1	4	0
75	39	2020-03-20	1	0	7	0
75	49	2020-03-20	3	1	2	0
75	59	2020-03-20	8	2	4	1
75	69	2020-03-20	11	4	7	1
75	79	2020-03-20	12	5	4	0
75	89	2020-03-20	21	2	0	1
75	90	2020-03-20	5	0	1	1
76	0	2020-03-20	183	66	73	21
76	9	2020-03-20	1	0	7	0
76	19	2020-03-20	0	0	4	0
76	29	2020-03-20	3	0	5	1
76	39	2020-03-20	4	1	9	0
76	49	2020-03-20	13	6	7	0
76	59	2020-03-20	21	9	18	1
76	69	2020-03-20	49	20	4	0
76	79	2020-03-20	56	24	16	5
76	89	2020-03-20	28	5	2	12
76	90	2020-03-20	7	1	0	2
84	0	2020-03-20	463	87	179	33
84	9	2020-03-20	2	1	1	0
84	19	2020-03-20	0	0	2	0
84	29	2020-03-20	2	0	12	0
84	39	2020-03-20	13	2	19	1
84	49	2020-03-20	19	3	18	0
84	59	2020-03-20	39	13	27	1
84	69	2020-03-20	66	21	29	1
84	79	2020-03-20	120	36	41	7
84	89	2020-03-20	135	9	20	14
84	90	2020-03-20	58	0	8	9
93	0	2020-03-20	281	55	280	11
93	9	2020-03-20	2	0	5	0
93	19	2020-03-20	5	0	17	0
93	29	2020-03-20	6	1	41	0
93	39	2020-03-20	23	0	32	0
93	49	2020-03-20	37	5	53	0
93	59	2020-03-20	50	7	55	0
93	69	2020-03-20	62	13	37	1
93	79	2020-03-20	51	21	26	2
93	89	2020-03-20	32	7	13	7
93	90	2020-03-20	13	1	1	1
94	0	2020-03-20	66	14	33	3
94	9	2020-03-20	2	0	0	0
94	19	2020-03-20	0	0	1	0
94	29	2020-03-20	2	0	6	0
94	39	2020-03-20	1	0	6	0
94	49	2020-03-20	2	0	7	0
94	59	2020-03-20	10	3	5	0
94	69	2020-03-20	12	5	5	1
94	79	2020-03-20	17	4	1	1
94	89	2020-03-20	16	1	1	0
94	90	2020-03-20	3	0	1	1
01	0	2020-03-21	0	0	0	0
01	9	2020-03-21	0	0	0	0
01	19	2020-03-21	0	0	0	0
01	29	2020-03-21	0	0	0	0
01	39	2020-03-21	0	0	0	0
01	49	2020-03-21	0	0	0	0
01	59	2020-03-21	0	0	0	0
01	69	2020-03-21	0	0	0	0
01	79	2020-03-21	0	0	0	0
01	89	2020-03-21	0	0	0	0
01	90	2020-03-21	0	0	0	0
02	0	2020-03-21	19	5	0	1
02	9	2020-03-21	0	0	0	0
02	19	2020-03-21	0	0	0	0
02	29	2020-03-21	2	1	0	0
02	39	2020-03-21	3	0	0	0
02	49	2020-03-21	3	1	0	0
02	59	2020-03-21	6	0	0	0
02	69	2020-03-21	4	3	0	0
02	79	2020-03-21	1	0	0	0
02	89	2020-03-21	0	0	0	1
02	90	2020-03-21	0	0	0	0
03	0	2020-03-21	0	0	0	0
03	9	2020-03-21	0	0	0	0
03	19	2020-03-21	0	0	0	0
03	29	2020-03-21	0	0	0	0
03	39	2020-03-21	0	0	0	0
03	49	2020-03-21	0	0	0	0
03	59	2020-03-21	0	0	0	0
03	69	2020-03-21	0	0	0	0
03	79	2020-03-21	0	0	0	0
03	89	2020-03-21	0	0	0	0
03	90	2020-03-21	0	0	0	0
04	0	2020-03-21	2	2	0	0
04	9	2020-03-21	0	0	0	0
04	19	2020-03-21	0	0	0	0
04	29	2020-03-21	0	0	0	0
04	39	2020-03-21	0	0	0	0
04	49	2020-03-21	0	0	0	0
04	59	2020-03-21	0	0	0	0
04	69	2020-03-21	0	0	0	0
04	79	2020-03-21	1	1	0	0
04	89	2020-03-21	1	1	0	0
04	90	2020-03-21	0	0	0	0
06	0	2020-03-21	0	0	0	0
06	9	2020-03-21	0	0	0	0
06	19	2020-03-21	0	0	0	0
06	29	2020-03-21	0	0	0	0
06	39	2020-03-21	0	0	0	0
06	49	2020-03-21	0	0	0	0
06	59	2020-03-21	0	0	0	0
06	69	2020-03-21	0	0	0	0
06	79	2020-03-21	0	0	0	0
06	89	2020-03-21	0	0	0	0
06	90	2020-03-21	0	0	0	0
11	0	2020-03-21	2178	567	457	126
11	9	2020-03-21	11	3	8	0
11	19	2020-03-21	7	2	3	0
11	29	2020-03-21	29	7	36	0
11	39	2020-03-21	120	33	68	0
11	49	2020-03-21	197	60	50	4
11	59	2020-03-21	374	141	91	5
11	69	2020-03-21	412	132	76	16
11	79	2020-03-21	440	128	63	33
11	89	2020-03-21	382	53	47	51
11	90	2020-03-21	162	3	11	13
24	0	2020-03-21	64	15	6	3
24	9	2020-03-21	0	0	0	0
24	19	2020-03-21	1	0	0	0
24	29	2020-03-21	1	0	0	0
24	39	2020-03-21	1	0	1	0
24	49	2020-03-21	3	1	0	0
24	59	2020-03-21	7	2	2	0
24	69	2020-03-21	14	4	1	0
24	79	2020-03-21	18	7	2	1
24	89	2020-03-21	12	1	0	2
24	90	2020-03-21	7	0	0	0
27	0	2020-03-21	297	82	104	35
27	9	2020-03-21	1	0	0	0
27	19	2020-03-21	0	0	1	0
27	29	2020-03-21	3	1	10	0
27	39	2020-03-21	8	2	9	0
27	49	2020-03-21	14	4	12	0
27	59	2020-03-21	35	14	21	2
27	69	2020-03-21	66	25	9	1
27	79	2020-03-21	70	21	15	11
27	89	2020-03-21	72	14	15	15
27	90	2020-03-21	27	0	11	6
28	0	2020-03-21	100	22	15	6
28	9	2020-03-21	0	0	0	0
28	19	2020-03-21	0	0	0	0
28	29	2020-03-21	1	0	2	0
28	39	2020-03-21	3	1	0	0
28	49	2020-03-21	7	1	1	0
28	59	2020-03-21	10	1	5	0
28	69	2020-03-21	18	10	5	1
28	79	2020-03-21	29	6	1	1
28	89	2020-03-21	24	3	1	3
28	90	2020-03-21	8	0	0	1
32	0	2020-03-21	439	147	162	58
32	9	2020-03-21	1	0	13	0
32	19	2020-03-21	3	0	1	0
32	29	2020-03-21	9	2	13	0
32	39	2020-03-21	14	7	27	0
32	49	2020-03-21	22	8	27	0
32	59	2020-03-21	50	25	28	0
32	69	2020-03-21	83	43	11	7
32	79	2020-03-21	112	50	18	18
32	89	2020-03-21	112	11	14	29
32	90	2020-03-21	32	0	9	4
44	0	2020-03-21	1556	349	355	227
44	9	2020-03-21	10	0	44	0
44	19	2020-03-21	2	1	5	0
44	29	2020-03-21	16	3	16	0
44	39	2020-03-21	35	11	23	0
44	49	2020-03-21	79	26	24	2
44	59	2020-03-21	166	50	54	6
44	69	2020-03-21	327	111	49	18
44	79	2020-03-21	399	117	58	47
44	89	2020-03-21	342	21	48	100
44	90	2020-03-21	124	0	18	50
52	0	2020-03-21	88	23	63	3
52	9	2020-03-21	0	0	0	0
52	19	2020-03-21	0	0	0	0
52	29	2020-03-21	1	0	7	0
52	39	2020-03-21	1	0	4	0
52	49	2020-03-21	5	1	14	0
52	59	2020-03-21	11	3	11	0
52	69	2020-03-21	19	7	15	0
52	79	2020-03-21	26	7	6	0
52	89	2020-03-21	16	4	5	1
52	90	2020-03-21	8	0	1	2
53	0	2020-03-21	122	26	55	15
53	9	2020-03-21	0	0	2	0
53	19	2020-03-21	0	0	0	0
53	29	2020-03-21	2	0	3	0
53	39	2020-03-21	5	1	4	0
53	49	2020-03-21	3	0	1	0
53	59	2020-03-21	14	4	10	0
53	69	2020-03-21	19	2	16	1
53	79	2020-03-21	35	13	14	2
53	89	2020-03-21	31	6	4	8
53	90	2020-03-21	11	0	1	4
75	0	2020-03-21	118	32	36	5
75	9	2020-03-21	1	0	0	0
75	19	2020-03-21	0	0	1	0
75	29	2020-03-21	4	1	4	0
75	39	2020-03-21	1	0	7	0
75	49	2020-03-21	6	2	4	0
75	59	2020-03-21	13	6	5	1
75	69	2020-03-21	23	9	8	1
75	79	2020-03-21	25	9	4	0
75	89	2020-03-21	36	5	1	2
75	90	2020-03-21	8	0	1	1
76	0	2020-03-21	206	72	96	26
76	9	2020-03-21	1	0	7	0
76	19	2020-03-21	0	0	4	0
76	29	2020-03-21	3	1	8	1
76	39	2020-03-21	5	3	11	0
76	49	2020-03-21	18	7	9	0
76	59	2020-03-21	25	10	23	1
76	69	2020-03-21	47	21	12	1
76	79	2020-03-21	58	23	19	5
76	89	2020-03-21	35	5	3	15
76	90	2020-03-21	9	1	0	3
84	0	2020-03-21	581	97	200	40
84	9	2020-03-21	3	1	1	0
84	19	2020-03-21	0	0	2	0
84	29	2020-03-21	4	0	12	0
84	39	2020-03-21	16	2	22	1
84	49	2020-03-21	27	4	23	0
84	59	2020-03-21	49	15	29	1
84	69	2020-03-21	82	23	35	2
84	79	2020-03-21	159	41	45	10
84	89	2020-03-21	159	9	22	17
84	90	2020-03-21	71	0	8	9
93	0	2020-03-21	334	72	312	13
93	9	2020-03-21	1	0	6	0
93	19	2020-03-21	5	0	17	0
93	29	2020-03-21	7	1	43	0
93	39	2020-03-21	30	1	38	0
93	49	2020-03-21	47	8	59	0
93	59	2020-03-21	61	10	60	0
93	69	2020-03-21	70	14	44	1
93	79	2020-03-21	59	27	29	2
93	89	2020-03-21	36	7	15	9
93	90	2020-03-21	17	3	1	1
94	0	2020-03-21	68	14	35	4
94	9	2020-03-21	0	0	2	0
94	19	2020-03-21	0	0	1	0
94	29	2020-03-21	2	0	7	0
94	39	2020-03-21	1	0	6	0
94	49	2020-03-21	2	0	7	0
94	59	2020-03-21	10	3	5	0
94	69	2020-03-21	14	6	5	1
94	79	2020-03-21	17	4	1	2
94	89	2020-03-21	19	1	0	0
94	90	2020-03-21	3	0	1	1
01	0	2020-03-22	6	6	0	0
01	9	2020-03-22	0	0	0	0
01	19	2020-03-22	0	0	0	0
01	29	2020-03-22	0	0	0	0
01	39	2020-03-22	1	1	0	0
01	49	2020-03-22	0	0	0	0
01	59	2020-03-22	2	2	0	0
01	69	2020-03-22	2	2	0	0
01	79	2020-03-22	1	1	0	0
01	89	2020-03-22	0	0	0	0
01	90	2020-03-22	0	0	0	0
02	0	2020-03-22	19	5	0	1
02	9	2020-03-22	0	0	0	0
02	19	2020-03-22	0	0	0	0
02	29	2020-03-22	2	1	0	0
02	39	2020-03-22	3	0	0	0
02	49	2020-03-22	3	1	0	0
02	59	2020-03-22	6	0	0	0
02	69	2020-03-22	4	3	0	0
02	79	2020-03-22	1	0	0	0
02	89	2020-03-22	0	0	0	1
02	90	2020-03-22	0	0	0	0
03	0	2020-03-22	0	0	0	0
03	9	2020-03-22	0	0	0	0
03	19	2020-03-22	0	0	0	0
03	29	2020-03-22	0	0	0	0
03	39	2020-03-22	0	0	0	0
03	49	2020-03-22	0	0	0	0
03	59	2020-03-22	0	0	0	0
03	69	2020-03-22	0	0	0	0
03	79	2020-03-22	0	0	0	0
03	89	2020-03-22	0	0	0	0
03	90	2020-03-22	0	0	0	0
04	0	2020-03-22	2	2	0	0
04	9	2020-03-22	0	0	0	0
04	19	2020-03-22	0	0	0	0
04	29	2020-03-22	0	0	0	0
04	39	2020-03-22	0	0	0	0
04	49	2020-03-22	0	0	0	0
04	59	2020-03-22	0	0	0	0
04	69	2020-03-22	0	0	0	0
04	79	2020-03-22	1	1	0	0
04	89	2020-03-22	1	1	0	0
04	90	2020-03-22	0	0	0	0
06	0	2020-03-22	0	0	0	0
06	9	2020-03-22	0	0	0	0
06	19	2020-03-22	0	0	0	0
06	29	2020-03-22	0	0	0	0
06	39	2020-03-22	0	0	0	0
06	49	2020-03-22	0	0	0	0
06	59	2020-03-22	0	0	0	0
06	69	2020-03-22	0	0	0	0
06	79	2020-03-22	0	0	0	0
06	89	2020-03-22	0	0	0	0
06	90	2020-03-22	0	0	0	0
11	0	2020-03-22	2638	666	545	148
11	9	2020-03-22	16	2	10	0
11	19	2020-03-22	8	2	3	0
11	29	2020-03-22	39	9	41	0
11	39	2020-03-22	144	42	86	1
11	49	2020-03-22	252	70	63	5
11	59	2020-03-22	460	169	102	5
11	69	2020-03-22	513	153	94	21
11	79	2020-03-22	523	150	71	36
11	89	2020-03-22	445	59	56	58
11	90	2020-03-22	191	4	14	18
24	0	2020-03-22	74	21	10	3
24	9	2020-03-22	0	0	0	0
24	19	2020-03-22	0	0	1	0
24	29	2020-03-22	1	0	0	0
24	39	2020-03-22	1	0	1	0
24	49	2020-03-22	4	2	1	0
24	59	2020-03-22	8	3	2	0
24	69	2020-03-22	16	7	2	0
24	79	2020-03-22	23	8	2	1
24	89	2020-03-22	12	1	1	2
24	90	2020-03-22	9	0	0	0
27	0	2020-03-22	353	90	180	48
27	9	2020-03-22	1	0	0	0
27	19	2020-03-22	1	0	2	0
27	29	2020-03-22	4	1	16	0
27	39	2020-03-22	9	2	15	0
27	49	2020-03-22	17	3	22	1
27	59	2020-03-22	41	15	34	2
27	69	2020-03-22	76	27	21	5
27	79	2020-03-22	87	26	24	13
27	89	2020-03-22	88	15	27	18
27	90	2020-03-22	28	0	18	9
28	0	2020-03-22	125	29	17	8
28	9	2020-03-22	0	0	0	0
28	19	2020-03-22	0	0	0	0
28	29	2020-03-22	3	0	2	0
28	39	2020-03-22	4	1	0	0
28	49	2020-03-22	7	2	1	0
28	59	2020-03-22	14	2	5	0
28	69	2020-03-22	26	12	6	1
28	79	2020-03-22	35	9	2	2
28	89	2020-03-22	24	3	1	4
28	90	2020-03-22	11	0	0	1
32	0	2020-03-22	490	156	178	69
32	9	2020-03-22	1	0	13	0
32	19	2020-03-22	2	0	2	0
32	29	2020-03-22	11	2	15	0
32	39	2020-03-22	18	8	29	0
32	49	2020-03-22	21	9	32	1
32	59	2020-03-22	58	29	28	0
32	69	2020-03-22	90	43	12	10
32	79	2020-03-22	126	52	22	21
32	89	2020-03-22	124	12	15	31
32	90	2020-03-22	38	0	9	6
44	0	2020-03-22	1744	385	398	266
44	9	2020-03-22	8	0	47	0
44	19	2020-03-22	2	1	5	0
44	29	2020-03-22	18	1	16	0
44	39	2020-03-22	38	11	26	0
44	49	2020-03-22	94	30	26	2
44	59	2020-03-22	181	55	64	6
44	69	2020-03-22	364	122	54	21
44	79	2020-03-22	460	136	69	63
44	89	2020-03-22	393	22	53	115
44	90	2020-03-22	137	0	21	55
52	0	2020-03-22	107	28	73	4
52	9	2020-03-22	0	0	0	0
52	19	2020-03-22	0	0	0	0
52	29	2020-03-22	1	0	7	0
52	39	2020-03-22	1	0	5	0
52	49	2020-03-22	6	1	16	0
52	59	2020-03-22	15	3	13	0
52	69	2020-03-22	27	11	15	0
52	79	2020-03-22	30	9	8	0
52	89	2020-03-22	18	3	7	2
52	90	2020-03-22	7	0	2	2
53	0	2020-03-22	130	31	62	17
53	9	2020-03-22	0	0	3	0
53	19	2020-03-22	0	0	0	0
53	29	2020-03-22	3	0	3	0
53	39	2020-03-22	8	1	4	0
53	49	2020-03-22	3	0	1	0
53	59	2020-03-22	18	8	11	0
53	69	2020-03-22	19	4	18	1
53	79	2020-03-22	36	12	17	3
53	89	2020-03-22	30	6	4	9
53	90	2020-03-22	11	0	1	4
75	0	2020-03-22	149	41	39	9
75	9	2020-03-22	2	0	0	0
75	19	2020-03-22	1	0	1	0
75	29	2020-03-22	4	1	4	0
75	39	2020-03-22	2	0	8	0
75	49	2020-03-22	8	2	4	0
75	59	2020-03-22	22	10	5	1
75	69	2020-03-22	28	10	8	1
75	79	2020-03-22	29	11	5	0
75	89	2020-03-22	44	6	1	5
75	90	2020-03-22	7	0	1	2
76	0	2020-03-22	261	73	108	28
76	9	2020-03-22	3	0	7	0
76	19	2020-03-22	0	0	4	0
76	29	2020-03-22	2	0	9	1
76	39	2020-03-22	8	2	11	0
76	49	2020-03-22	23	8	12	0
76	59	2020-03-22	34	10	26	1
76	69	2020-03-22	60	22	14	1
76	79	2020-03-22	71	23	22	4
76	89	2020-03-22	46	7	2	18
76	90	2020-03-22	11	1	0	3
84	0	2020-03-22	679	119	220	52
84	9	2020-03-22	5	1	1	0
84	19	2020-03-22	0	0	2	0
84	29	2020-03-22	6	1	12	0
84	39	2020-03-22	18	3	24	1
84	49	2020-03-22	30	6	30	0
84	59	2020-03-22	63	17	32	1
84	69	2020-03-22	97	31	42	2
84	79	2020-03-22	189	47	46	13
84	89	2020-03-22	179	10	22	20
84	90	2020-03-22	78	0	8	15
93	0	2020-03-22	391	79	337	15
93	9	2020-03-22	1	0	6	0
93	19	2020-03-22	5	0	17	0
93	29	2020-03-22	7	1	47	0
93	39	2020-03-22	33	1	39	0
93	49	2020-03-22	50	8	66	0
93	59	2020-03-22	72	13	67	0
93	69	2020-03-22	79	17	49	1
93	79	2020-03-22	73	28	29	2
93	89	2020-03-22	47	7	15	10
93	90	2020-03-22	22	3	2	2
94	0	2020-03-22	72	15	36	6
94	9	2020-03-22	0	0	2	0
94	19	2020-03-22	0	0	1	0
94	29	2020-03-22	3	0	8	0
94	39	2020-03-22	1	0	6	0
94	49	2020-03-22	3	0	7	0
94	59	2020-03-22	10	2	5	0
94	69	2020-03-22	16	7	5	1
94	79	2020-03-22	18	5	1	2
94	89	2020-03-22	18	1	0	2
94	90	2020-03-22	3	0	1	1
01	0	2020-03-23	6	6	0	0
01	9	2020-03-23	0	0	0	0
01	19	2020-03-23	0	0	0	0
01	29	2020-03-23	0	0	0	0
01	39	2020-03-23	1	1	0	0
01	49	2020-03-23	0	0	0	0
01	59	2020-03-23	2	2	0	0
01	69	2020-03-23	2	2	0	0
01	79	2020-03-23	1	1	0	0
01	89	2020-03-23	0	0	0	0
01	90	2020-03-23	0	0	0	0
02	0	2020-03-23	19	5	0	1
02	9	2020-03-23	0	0	0	0
02	19	2020-03-23	0	0	0	0
02	29	2020-03-23	2	1	0	0
02	39	2020-03-23	3	0	0	0
02	49	2020-03-23	3	1	0	0
02	59	2020-03-23	6	0	0	0
02	69	2020-03-23	4	3	0	0
02	79	2020-03-23	1	0	0	0
02	89	2020-03-23	0	0	0	1
02	90	2020-03-23	0	0	0	0
03	0	2020-03-23	0	0	0	0
03	9	2020-03-23	0	0	0	0
03	19	2020-03-23	0	0	0	0
03	29	2020-03-23	0	0	0	0
03	39	2020-03-23	0	0	0	0
03	49	2020-03-23	0	0	0	0
03	59	2020-03-23	0	0	0	0
03	69	2020-03-23	0	0	0	0
03	79	2020-03-23	0	0	0	0
03	89	2020-03-23	0	0	0	0
03	90	2020-03-23	0	0	0	0
04	0	2020-03-23	2	2	0	0
04	9	2020-03-23	0	0	0	0
04	19	2020-03-23	0	0	0	0
04	29	2020-03-23	0	0	0	0
04	39	2020-03-23	0	0	0	0
04	49	2020-03-23	0	0	0	0
04	59	2020-03-23	0	0	0	0
04	69	2020-03-23	0	0	0	0
04	79	2020-03-23	1	1	0	0
04	89	2020-03-23	1	1	0	0
04	90	2020-03-23	0	0	0	0
06	0	2020-03-23	0	0	0	0
06	9	2020-03-23	0	0	0	0
06	19	2020-03-23	0	0	0	0
06	29	2020-03-23	0	0	0	0
06	39	2020-03-23	0	0	0	0
06	49	2020-03-23	0	0	0	0
06	59	2020-03-23	0	0	0	0
06	69	2020-03-23	0	0	0	0
06	79	2020-03-23	0	0	0	0
06	89	2020-03-23	0	0	0	0
06	90	2020-03-23	0	0	0	0
11	0	2020-03-23	3142	787	665	193
11	9	2020-03-23	20	5	16	0
11	19	2020-03-23	7	2	4	0
11	29	2020-03-23	48	9	47	0
11	39	2020-03-23	179	53	103	1
11	49	2020-03-23	293	79	88	5
11	59	2020-03-23	557	200	128	9
11	69	2020-03-23	627	201	115	25
11	79	2020-03-23	600	176	81	50
11	89	2020-03-23	537	54	61	71
11	90	2020-03-23	229	4	16	26
24	0	2020-03-23	117	38	15	8
24	9	2020-03-23	0	0	0	0
24	19	2020-03-23	0	0	1	0
24	29	2020-03-23	1	0	0	0
24	39	2020-03-23	1	0	1	0
24	49	2020-03-23	11	4	1	0
24	59	2020-03-23	18	7	4	0
24	69	2020-03-23	18	11	4	0
24	79	2020-03-23	32	13	3	4
24	89	2020-03-23	23	3	1	3
24	90	2020-03-23	13	0	0	1
27	0	2020-03-23	411	99	198	62
27	9	2020-03-23	2	1	0	0
27	19	2020-03-23	1	0	2	0
27	29	2020-03-23	4	1	17	0
27	39	2020-03-23	14	2	17	0
27	49	2020-03-23	24	3	22	1
27	59	2020-03-23	46	18	41	2
27	69	2020-03-23	83	29	26	10
27	79	2020-03-23	98	31	25	15
27	89	2020-03-23	107	13	28	22
27	90	2020-03-23	31	0	19	12
28	0	2020-03-23	148	33	24	9
28	9	2020-03-23	0	0	0	0
28	19	2020-03-23	0	0	0	0
28	29	2020-03-23	4	1	4	0
28	39	2020-03-23	3	0	1	0
28	49	2020-03-23	9	2	3	0
28	59	2020-03-23	16	3	5	0
28	69	2020-03-23	33	13	6	1
28	79	2020-03-23	41	10	3	2
28	89	2020-03-23	29	3	2	5
28	90	2020-03-23	11	0	0	1
32	0	2020-03-23	612	187	201	86
32	9	2020-03-23	3	2	13	0
32	19	2020-03-23	3	0	2	0
32	29	2020-03-23	13	3	16	0
32	39	2020-03-23	23	9	30	0
32	49	2020-03-23	30	12	39	1
32	59	2020-03-23	73	35	32	2
32	69	2020-03-23	111	46	13	11
32	79	2020-03-23	158	62	28	26
32	89	2020-03-23	144	15	17	35
32	90	2020-03-23	48	0	10	11
44	0	2020-03-23	2011	432	470	327
44	9	2020-03-23	7	0	49	0
44	19	2020-03-23	3	1	6	0
44	29	2020-03-23	27	3	18	0
44	39	2020-03-23	52	15	33	0
44	49	2020-03-23	99	31	33	4
44	59	2020-03-23	212	66	77	7
44	69	2020-03-23	430	143	68	30
44	79	2020-03-23	537	147	81	77
44	89	2020-03-23	452	20	64	141
44	90	2020-03-23	145	0	20	64
52	0	2020-03-23	147	35	74	9
52	9	2020-03-23	0	0	0	0
52	19	2020-03-23	0	0	0	0
52	29	2020-03-23	2	0	7	0
52	39	2020-03-23	3	1	5	0
52	49	2020-03-23	10	1	17	0
52	59	2020-03-23	19	3	13	0
52	69	2020-03-23	33	15	15	0
52	79	2020-03-23	43	13	8	0
52	89	2020-03-23	26	1	7	6
52	90	2020-03-23	9	0	2	3
53	0	2020-03-23	132	30	68	23
53	9	2020-03-23	0	0	3	0
53	19	2020-03-23	0	0	0	0
53	29	2020-03-23	2	0	3	0
53	39	2020-03-23	8	1	4	0
53	49	2020-03-23	3	0	2	0
53	59	2020-03-23	19	9	12	0
53	69	2020-03-23	21	4	18	1
53	79	2020-03-23	43	12	19	4
53	89	2020-03-23	26	4	6	12
53	90	2020-03-23	8	0	1	6
75	0	2020-03-23	196	47	59	13
75	9	2020-03-23	3	0	4	0
75	19	2020-03-23	1	0	1	0
75	29	2020-03-23	5	1	10	0
75	39	2020-03-23	6	1	11	0
75	49	2020-03-23	9	2	6	0
75	59	2020-03-23	32	11	5	1
75	69	2020-03-23	36	12	9	2
75	79	2020-03-23	38	12	7	1
75	89	2020-03-23	56	7	3	6
75	90	2020-03-23	9	0	1	3
76	0	2020-03-23	331	101	117	32
76	9	2020-03-23	5	0	7	0
76	19	2020-03-23	0	0	4	0
76	29	2020-03-23	3	1	10	1
76	39	2020-03-23	11	1	13	0
76	49	2020-03-23	35	13	12	0
76	59	2020-03-23	43	15	30	2
76	69	2020-03-23	78	29	16	1
76	79	2020-03-23	91	32	22	5
76	89	2020-03-23	52	9	3	20
76	90	2020-03-23	12	1	0	3
84	0	2020-03-23	853	157	254	70
84	9	2020-03-23	3	1	3	0
84	19	2020-03-23	0	0	2	0
84	29	2020-03-23	6	2	17	0
84	39	2020-03-23	22	2	27	1
84	49	2020-03-23	37	10	34	0
84	59	2020-03-23	81	22	38	1
84	69	2020-03-23	138	48	43	4
84	79	2020-03-23	232	56	51	17
84	89	2020-03-23	221	14	26	27
84	90	2020-03-23	96	0	9	20
93	0	2020-03-23	481	112	377	20
93	9	2020-03-23	1	0	6	0
93	19	2020-03-23	5	0	17	0
93	29	2020-03-23	10	3	50	0
93	39	2020-03-23	36	1	46	0
93	49	2020-03-23	53	12	72	0
93	59	2020-03-23	84	17	79	0
93	69	2020-03-23	103	31	57	1
93	79	2020-03-23	90	34	32	4
93	89	2020-03-23	67	9	16	12
93	90	2020-03-23	27	3	2	3
94	0	2020-03-23	65	9	45	7
94	9	2020-03-23	0	0	3	0
94	19	2020-03-23	0	0	1	0
94	29	2020-03-23	2	0	10	0
94	39	2020-03-23	1	0	7	0
94	49	2020-03-23	2	0	8	0
94	59	2020-03-23	10	2	6	0
94	69	2020-03-23	6	3	6	1
94	79	2020-03-23	18	3	1	2
94	89	2020-03-23	20	1	1	3
94	90	2020-03-23	6	0	2	1
01	0	2020-03-24	6	6	0	0
01	9	2020-03-24	0	0	0	0
01	19	2020-03-24	0	0	0	0
01	29	2020-03-24	0	0	0	0
01	39	2020-03-24	1	1	0	0
01	49	2020-03-24	0	0	0	0
01	59	2020-03-24	2	2	0	0
01	69	2020-03-24	2	2	0	0
01	79	2020-03-24	1	1	0	0
01	89	2020-03-24	0	0	0	0
01	90	2020-03-24	0	0	0	0
02	0	2020-03-24	13	5	11	1
02	9	2020-03-24	0	0	0	0
02	19	2020-03-24	0	0	0	0
02	29	2020-03-24	1	0	2	0
02	39	2020-03-24	1	0	2	0
02	49	2020-03-24	3	1	1	0
02	59	2020-03-24	4	2	4	0
02	69	2020-03-24	3	2	1	0
02	79	2020-03-24	1	0	1	0
02	89	2020-03-24	0	0	0	1
02	90	2020-03-24	0	0	0	0
03	0	2020-03-24	0	0	0	0
03	9	2020-03-24	0	0	0	0
03	19	2020-03-24	0	0	0	0
03	29	2020-03-24	0	0	0	0
03	39	2020-03-24	0	0	0	0
03	49	2020-03-24	0	0	0	0
03	59	2020-03-24	0	0	0	0
03	69	2020-03-24	0	0	0	0
03	79	2020-03-24	0	0	0	0
03	89	2020-03-24	0	0	0	0
03	90	2020-03-24	0	0	0	0
04	0	2020-03-24	3	3	0	0
04	9	2020-03-24	0	0	0	0
04	19	2020-03-24	0	0	0	0
04	29	2020-03-24	0	0	0	0
04	39	2020-03-24	0	0	0	0
04	49	2020-03-24	0	0	0	0
04	59	2020-03-24	0	0	0	0
04	69	2020-03-24	0	0	0	0
04	79	2020-03-24	2	2	0	0
04	89	2020-03-24	1	1	0	0
04	90	2020-03-24	0	0	0	0
06	0	2020-03-24	0	0	0	0
06	9	2020-03-24	0	0	0	0
06	19	2020-03-24	0	0	0	0
06	29	2020-03-24	0	0	0	0
06	39	2020-03-24	0	0	0	0
06	49	2020-03-24	0	0	0	0
06	59	2020-03-24	0	0	0	0
06	69	2020-03-24	0	0	0	0
06	79	2020-03-24	0	0	0	0
06	89	2020-03-24	0	0	0	0
06	90	2020-03-24	0	0	0	0
11	0	2020-03-24	3683	973	854	262
11	9	2020-03-24	17	4	22	0
11	19	2020-03-24	8	2	4	0
11	29	2020-03-24	55	12	62	0
11	39	2020-03-24	204	65	121	2
11	49	2020-03-24	347	98	122	6
11	59	2020-03-24	657	248	167	12
11	69	2020-03-24	777	258	157	34
11	79	2020-03-24	713	213	99	65
11	89	2020-03-24	610	61	73	98
11	90	2020-03-24	256	2	19	37
24	0	2020-03-24	137	44	24	9
24	9	2020-03-24	0	0	1	0
24	19	2020-03-24	0	0	1	0
24	29	2020-03-24	0	0	1	0
24	39	2020-03-24	1	0	1	0
24	49	2020-03-24	11	5	3	0
24	59	2020-03-24	18	6	5	0
24	69	2020-03-24	25	14	6	0
24	79	2020-03-24	37	13	4	4
24	89	2020-03-24	31	5	2	4
24	90	2020-03-24	14	1	0	1
27	0	2020-03-24	477	121	285	85
27	9	2020-03-24	2	1	2	0
27	19	2020-03-24	1	0	4	0
27	29	2020-03-24	5	1	22	0
27	39	2020-03-24	14	2	37	0
27	49	2020-03-24	23	4	39	1
27	59	2020-03-24	60	22	51	2
27	69	2020-03-24	99	34	35	10
27	79	2020-03-24	114	42	35	22
27	89	2020-03-24	122	14	38	35
27	90	2020-03-24	37	1	21	15
28	0	2020-03-24	170	40	32	15
28	9	2020-03-24	0	0	0	0
28	19	2020-03-24	0	0	0	0
28	29	2020-03-24	2	1	7	0
28	39	2020-03-24	4	0	2	0
28	49	2020-03-24	12	4	3	0
28	59	2020-03-24	17	2	7	1
28	69	2020-03-24	34	13	7	3
28	79	2020-03-24	51	16	3	3
28	89	2020-03-24	35	3	3	6
28	90	2020-03-24	12	0	0	2
32	0	2020-03-24	711	208	250	109
32	9	2020-03-24	4	2	14	0
32	19	2020-03-24	1	0	3	0
32	29	2020-03-24	11	3	23	0
32	39	2020-03-24	25	7	41	0
32	49	2020-03-24	38	13	45	1
32	59	2020-03-24	93	41	39	4
32	69	2020-03-24	137	53	19	16
32	79	2020-03-24	187	72	33	32
32	89	2020-03-24	155	15	22	42
32	90	2020-03-24	53	0	10	13
44	0	2020-03-24	2402	504	619	407
44	9	2020-03-24	7	0	52	0
44	19	2020-03-24	3	1	6	0
44	29	2020-03-24	29	5	25	0
44	39	2020-03-24	60	17	42	0
44	49	2020-03-24	126	37	45	4
44	59	2020-03-24	255	80	96	10
44	69	2020-03-24	491	152	100	39
44	79	2020-03-24	649	173	115	93
44	89	2020-03-24	547	30	92	175
44	90	2020-03-24	190	0	22	82
52	0	2020-03-24	187	43	93	13
52	9	2020-03-24	0	0	0	0
52	19	2020-03-24	0	0	0	0
52	29	2020-03-24	3	0	10	0
52	39	2020-03-24	4	1	6	0
52	49	2020-03-24	12	2	21	0
52	59	2020-03-24	20	6	19	0
52	69	2020-03-24	39	16	18	0
52	79	2020-03-24	53	15	9	0
52	89	2020-03-24	42	2	8	8
52	90	2020-03-24	13	0	2	5
53	0	2020-03-24	133	30	86	25
53	9	2020-03-24	1	0	3	0
53	19	2020-03-24	0	0	0	0
53	29	2020-03-24	2	0	3	0
53	39	2020-03-24	7	1	6	0
53	49	2020-03-24	4	0	3	0
53	59	2020-03-24	18	10	15	0
53	69	2020-03-24	18	5	25	2
53	79	2020-03-24	44	10	22	5
53	89	2020-03-24	30	4	7	12
53	90	2020-03-24	8	0	2	6
75	0	2020-03-24	263	69	78	16
75	9	2020-03-24	3	0	7	0
75	19	2020-03-24	1	0	1	0
75	29	2020-03-24	8	1	12	0
75	39	2020-03-24	7	1	13	0
75	49	2020-03-24	16	6	7	0
75	59	2020-03-24	42	15	8	2
75	69	2020-03-24	51	19	11	3
75	79	2020-03-24	50	16	10	0
75	89	2020-03-24	65	8	6	7
75	90	2020-03-24	18	1	1	4
76	0	2020-03-24	382	125	149	39
76	9	2020-03-24	4	0	9	0
76	19	2020-03-24	0	0	4	0
76	29	2020-03-24	6	1	12	1
76	39	2020-03-24	9	3	23	0
76	49	2020-03-24	41	12	12	0
76	59	2020-03-24	56	21	34	2
76	69	2020-03-24	88	32	22	1
76	79	2020-03-24	110	46	24	7
76	89	2020-03-24	54	9	9	24
76	90	2020-03-24	14	1	0	4
84	0	2020-03-24	981	190	314	86
84	9	2020-03-24	3	0	5	0
84	19	2020-03-24	0	0	2	0
84	29	2020-03-24	9	2	21	0
84	39	2020-03-24	22	3	34	1
84	49	2020-03-24	50	13	39	1
84	59	2020-03-24	93	28	50	3
84	69	2020-03-24	152	49	49	4
84	79	2020-03-24	267	70	58	21
84	89	2020-03-24	254	21	37	30
84	90	2020-03-24	110	0	13	26
93	0	2020-03-24	545	133	435	26
93	9	2020-03-24	2	0	7	0
93	19	2020-03-24	3	0	19	0
93	29	2020-03-24	14	2	57	0
93	39	2020-03-24	37	2	55	0
93	49	2020-03-24	59	12	80	0
93	59	2020-03-24	99	24	87	0
93	69	2020-03-24	121	38	71	1
93	79	2020-03-24	102	40	38	4
93	89	2020-03-24	78	11	16	15
93	90	2020-03-24	24	2	5	6
94	0	2020-03-24	70	9	51	7
94	9	2020-03-24	0	0	4	0
94	19	2020-03-24	0	0	1	0
94	29	2020-03-24	2	0	10	0
94	39	2020-03-24	1	0	7	0
94	49	2020-03-24	3	0	7	0
94	59	2020-03-24	11	2	9	0
94	69	2020-03-24	6	3	7	1
94	79	2020-03-24	18	3	1	2
94	89	2020-03-24	21	1	2	3
94	90	2020-03-24	8	0	2	1
01	0	2020-03-25	6	6	0	0
01	9	2020-03-25	0	0	0	0
01	19	2020-03-25	0	0	0	0
01	29	2020-03-25	0	0	0	0
01	39	2020-03-25	1	1	0	0
01	49	2020-03-25	0	0	0	0
01	59	2020-03-25	2	2	0	0
01	69	2020-03-25	2	2	0	0
01	79	2020-03-25	1	1	0	0
01	89	2020-03-25	0	0	0	0
01	90	2020-03-25	0	0	0	0
02	0	2020-03-25	22	7	12	1
02	9	2020-03-25	1	0	0	0
02	19	2020-03-25	0	0	0	0
02	29	2020-03-25	1	0	2	0
02	39	2020-03-25	1	0	2	0
02	49	2020-03-25	5	1	2	0
02	59	2020-03-25	6	3	5	0
02	69	2020-03-25	4	2	0	0
02	79	2020-03-25	2	0	1	0
02	89	2020-03-25	2	1	0	1
02	90	2020-03-25	0	0	0	0
03	0	2020-03-25	0	0	0	0
03	9	2020-03-25	0	0	0	0
03	19	2020-03-25	0	0	0	0
03	29	2020-03-25	0	0	0	0
03	39	2020-03-25	0	0	0	0
03	49	2020-03-25	0	0	0	0
03	59	2020-03-25	0	0	0	0
03	69	2020-03-25	0	0	0	0
03	79	2020-03-25	0	0	0	0
03	89	2020-03-25	0	0	0	0
03	90	2020-03-25	0	0	0	0
04	0	2020-03-25	3	3	0	0
04	9	2020-03-25	0	0	0	0
04	19	2020-03-25	0	0	0	0
04	29	2020-03-25	0	0	0	0
04	39	2020-03-25	0	0	0	0
04	49	2020-03-25	0	0	0	0
04	59	2020-03-25	0	0	0	0
04	69	2020-03-25	0	0	0	0
04	79	2020-03-25	2	2	0	0
04	89	2020-03-25	1	1	0	0
04	90	2020-03-25	0	0	0	0
06	0	2020-03-25	0	0	0	0
06	9	2020-03-25	0	0	0	0
06	19	2020-03-25	0	0	0	0
06	29	2020-03-25	0	0	0	0
06	39	2020-03-25	0	0	0	0
06	49	2020-03-25	0	0	0	0
06	59	2020-03-25	0	0	0	0
06	69	2020-03-25	0	0	0	0
06	79	2020-03-25	0	0	0	0
06	89	2020-03-25	0	0	0	0
06	90	2020-03-25	0	0	0	0
11	0	2020-03-25	4389	1114	1084	357
11	9	2020-03-25	15	4	29	0
11	19	2020-03-25	7	2	7	1
11	29	2020-03-25	63	12	71	0
11	39	2020-03-25	249	67	147	2
11	49	2020-03-25	414	110	161	7
11	59	2020-03-25	786	284	214	16
11	69	2020-03-25	946	321	200	48
11	79	2020-03-25	858	242	133	83
11	89	2020-03-25	702	57	93	137
11	90	2020-03-25	301	3	21	56
24	0	2020-03-25	165	58	36	13
24	9	2020-03-25	0	0	1	0
24	19	2020-03-25	0	0	1	0
24	29	2020-03-25	1	1	1	0
24	39	2020-03-25	2	1	2	0
24	49	2020-03-25	19	7	7	0
24	59	2020-03-25	15	6	7	1
24	69	2020-03-25	28	17	6	0
24	79	2020-03-25	49	20	6	6
24	89	2020-03-25	38	5	5	4
24	90	2020-03-25	13	1	0	2
27	0	2020-03-25	591	150	348	102
27	9	2020-03-25	3	1	4	0
27	19	2020-03-25	3	0	4	0
27	29	2020-03-25	4	0	29	0
27	39	2020-03-25	15	3	43	0
27	49	2020-03-25	30	5	50	2
27	59	2020-03-25	79	29	62	2
27	69	2020-03-25	117	47	45	11
27	79	2020-03-25	144	51	45	26
27	89	2020-03-25	148	13	44	42
27	90	2020-03-25	46	1	21	19
28	0	2020-03-25	225	56	50	18
28	9	2020-03-25	0	0	1	0
28	19	2020-03-25	1	0	0	0
28	29	2020-03-25	3	0	8	0
28	39	2020-03-25	5	0	5	0
28	49	2020-03-25	15	5	5	0
28	59	2020-03-25	22	5	15	2
28	69	2020-03-25	46	18	8	3
28	79	2020-03-25	68	24	5	3
28	89	2020-03-25	50	4	3	7
28	90	2020-03-25	13	0	0	3
32	0	2020-03-25	829	247	287	122
32	9	2020-03-25	7	2	14	0
32	19	2020-03-25	1	0	3	0
32	29	2020-03-25	10	2	28	0
32	39	2020-03-25	29	6	44	0
32	49	2020-03-25	49	12	49	1
32	59	2020-03-25	111	49	44	4
32	69	2020-03-25	167	71	26	18
32	79	2020-03-25	217	85	39	33
32	89	2020-03-25	177	18	27	49
32	90	2020-03-25	56	0	12	16
44	0	2020-03-25	2720	575	769	505
44	9	2020-03-25	5	0	56	0
44	19	2020-03-25	4	1	6	0
44	29	2020-03-25	37	7	30	0
44	39	2020-03-25	67	20	54	0
44	49	2020-03-25	146	45	63	4
44	59	2020-03-25	290	90	113	13
44	69	2020-03-25	559	173	132	42
44	79	2020-03-25	744	195	147	117
44	89	2020-03-25	623	33	111	219
44	90	2020-03-25	202	0	32	105
52	0	2020-03-25	236	49	106	16
52	9	2020-03-25	0	0	0	0
52	19	2020-03-25	0	0	0	0
52	29	2020-03-25	3	0	10	0
52	39	2020-03-25	4	1	7	0
52	49	2020-03-25	10	3	27	0
52	59	2020-03-25	23	5	20	0
52	69	2020-03-25	43	17	20	0
52	79	2020-03-25	73	20	11	0
52	89	2020-03-25	55	2	9	10
52	90	2020-03-25	23	0	2	6
53	0	2020-03-25	158	38	102	28
53	9	2020-03-25	1	0	4	0
53	19	2020-03-25	1	1	0	0
53	29	2020-03-25	2	0	3	0
53	39	2020-03-25	8	1	8	0
53	49	2020-03-25	6	1	4	0
53	59	2020-03-25	23	13	17	0
53	69	2020-03-25	22	8	29	2
53	79	2020-03-25	53	10	26	6
53	89	2020-03-25	32	4	9	14
53	90	2020-03-25	9	0	2	6
75	0	2020-03-25	340	75	115	25
75	9	2020-03-25	4	0	7	0
75	19	2020-03-25	2	0	1	0
75	29	2020-03-25	10	1	16	0
75	39	2020-03-25	7	1	16	0
75	49	2020-03-25	22	7	16	0
75	59	2020-03-25	48	14	11	2
75	69	2020-03-25	63	17	16	5
75	79	2020-03-25	62	19	13	1
75	89	2020-03-25	89	12	11	11
75	90	2020-03-25	30	2	2	6
76	0	2020-03-25	469	147	183	46
76	9	2020-03-25	3	1	10	0
76	19	2020-03-25	0	0	4	0
76	29	2020-03-25	4	1	16	1
76	39	2020-03-25	12	3	26	0
76	49	2020-03-25	48	13	19	0
76	59	2020-03-25	68	25	41	2
76	69	2020-03-25	104	41	29	3
76	79	2020-03-25	133	52	29	9
76	89	2020-03-25	74	10	9	26
76	90	2020-03-25	21	0	0	5
84	0	2020-03-25	1230	258	404	106
84	9	2020-03-25	6	1	5	0
84	19	2020-03-25	1	1	3	0
84	29	2020-03-25	8	3	29	0
84	39	2020-03-25	26	6	48	1
84	49	2020-03-25	69	22	47	1
84	59	2020-03-25	122	40	65	4
84	69	2020-03-25	206	63	61	4
84	79	2020-03-25	328	87	73	28
84	89	2020-03-25	307	29	50	36
84	90	2020-03-25	125	0	12	31
93	0	2020-03-25	608	143	535	33
93	9	2020-03-25	3	0	8	0
93	19	2020-03-25	2	0	22	0
93	29	2020-03-25	15	2	67	1
93	39	2020-03-25	36	1	71	0
93	49	2020-03-25	59	14	103	0
93	59	2020-03-25	104	26	106	0
93	69	2020-03-25	130	39	86	2
93	79	2020-03-25	124	48	43	5
93	89	2020-03-25	95	10	22	17
93	90	2020-03-25	32	1	7	8
94	0	2020-03-25	81	9	54	15
94	9	2020-03-25	0	0	4	0
94	19	2020-03-25	0	0	1	0
94	29	2020-03-25	2	0	10	0
94	39	2020-03-25	1	0	7	0
94	49	2020-03-25	3	0	7	0
94	59	2020-03-25	11	2	9	0
94	69	2020-03-25	9	3	8	1
94	79	2020-03-25	20	3	1	4
94	89	2020-03-25	26	1	2	8
94	90	2020-03-25	9	0	4	2
01	0	2020-03-26	21	7	4	0
01	9	2020-03-26	0	0	0	0
01	19	2020-03-26	0	0	0	0
01	29	2020-03-26	0	0	0	0
01	39	2020-03-26	2	1	1	0
01	49	2020-03-26	1	0	0	0
01	59	2020-03-26	7	1	1	0
01	69	2020-03-26	8	3	0	0
01	79	2020-03-26	1	1	1	0
01	89	2020-03-26	2	1	1	0
01	90	2020-03-26	0	0	0	0
02	0	2020-03-26	29	11	13	1
02	9	2020-03-26	1	0	0	0
02	19	2020-03-26	0	0	0	0
02	29	2020-03-26	1	0	2	0
02	39	2020-03-26	2	0	2	0
02	49	2020-03-26	5	1	2	0
02	59	2020-03-26	7	4	6	0
02	69	2020-03-26	7	5	0	0
02	79	2020-03-26	4	0	1	0
02	89	2020-03-26	2	1	0	1
02	90	2020-03-26	0	0	0	0
03	0	2020-03-26	0	0	0	0
03	9	2020-03-26	0	0	0	0
03	19	2020-03-26	0	0	0	0
03	29	2020-03-26	0	0	0	0
03	39	2020-03-26	0	0	0	0
03	49	2020-03-26	0	0	0	0
03	59	2020-03-26	0	0	0	0
03	69	2020-03-26	0	0	0	0
03	79	2020-03-26	0	0	0	0
03	89	2020-03-26	0	0	0	0
03	90	2020-03-26	0	0	0	0
04	0	2020-03-26	3	3	0	0
04	9	2020-03-26	0	0	0	0
04	19	2020-03-26	0	0	0	0
04	29	2020-03-26	0	0	0	0
04	39	2020-03-26	0	0	0	0
04	49	2020-03-26	0	0	0	0
04	59	2020-03-26	0	0	0	0
04	69	2020-03-26	0	0	0	0
04	79	2020-03-26	2	2	0	0
04	89	2020-03-26	1	1	0	0
04	90	2020-03-26	0	0	0	0
06	0	2020-03-26	0	0	0	0
06	9	2020-03-26	0	0	0	0
06	19	2020-03-26	0	0	0	0
06	29	2020-03-26	0	0	0	0
06	39	2020-03-26	0	0	0	0
06	49	2020-03-26	0	0	0	0
06	59	2020-03-26	0	0	0	0
06	69	2020-03-26	0	0	0	0
06	79	2020-03-26	0	0	0	0
06	89	2020-03-26	0	0	0	0
06	90	2020-03-26	0	0	0	0
11	0	2020-03-26	5132	1269	1310	460
11	9	2020-03-26	15	6	32	0
11	19	2020-03-26	14	4	11	1
11	29	2020-03-26	70	14	83	0
11	39	2020-03-26	283	73	174	4
11	49	2020-03-26	479	126	192	9
11	59	2020-03-26	943	341	266	23
11	69	2020-03-26	1092	372	245	61
11	79	2020-03-26	1002	266	163	112
11	89	2020-03-26	831	54	111	169
11	90	2020-03-26	346	2	24	73
24	0	2020-03-26	198	69	50	20
24	9	2020-03-26	0	0	1	0
24	19	2020-03-26	0	0	1	0
24	29	2020-03-26	2	1	1	0
24	39	2020-03-26	3	2	3	0
24	49	2020-03-26	24	10	7	0
24	59	2020-03-26	19	8	11	1
24	69	2020-03-26	35	21	10	1
24	79	2020-03-26	57	21	10	7
24	89	2020-03-26	42	5	5	7
24	90	2020-03-26	15	1	1	4
27	0	2020-03-26	679	166	402	123
27	9	2020-03-26	4	1	4	0
27	19	2020-03-26	3	0	4	0
27	29	2020-03-26	6	0	33	0
27	39	2020-03-26	14	3	58	0
27	49	2020-03-26	35	5	57	2
27	59	2020-03-26	82	31	70	3
27	69	2020-03-26	135	49	53	12
27	79	2020-03-26	164	58	53	33
27	89	2020-03-26	180	18	48	52
27	90	2020-03-26	54	1	22	21
28	0	2020-03-26	273	75	62	20
28	9	2020-03-26	0	0	1	0
28	19	2020-03-26	2	0	0	0
28	29	2020-03-26	3	0	8	0
28	39	2020-03-26	8	2	5	0
28	49	2020-03-26	19	4	7	0
28	59	2020-03-26	31	10	18	3
28	69	2020-03-26	57	24	10	3
28	79	2020-03-26	82	30	8	4
28	89	2020-03-26	54	5	5	6
28	90	2020-03-26	15	0	0	4
32	0	2020-03-26	919	271	360	150
32	9	2020-03-26	8	2	14	0
32	19	2020-03-26	1	0	3	0
32	29	2020-03-26	8	2	32	0
32	39	2020-03-26	27	5	52	0
32	49	2020-03-26	53	16	59	1
32	59	2020-03-26	118	51	64	4
32	69	2020-03-26	202	83	34	18
32	79	2020-03-26	236	88	49	42
32	89	2020-03-26	198	22	35	62
32	90	2020-03-26	63	0	17	22
44	0	2020-03-26	2979	636	960	584
44	9	2020-03-26	9	0	58	0
44	19	2020-03-26	5	2	7	0
44	29	2020-03-26	37	7	38	0
44	39	2020-03-26	70	20	69	0
44	49	2020-03-26	156	49	80	4
44	59	2020-03-26	307	101	149	16
44	69	2020-03-26	617	195	177	50
44	79	2020-03-26	823	212	179	143
44	89	2020-03-26	685	35	137	247
44	90	2020-03-26	220	2	38	118
52	0	2020-03-26	282	59	127	24
52	9	2020-03-26	0	0	0	0
52	19	2020-03-26	0	0	1	0
52	29	2020-03-26	3	0	11	0
52	39	2020-03-26	7	1	8	0
52	49	2020-03-26	12	2	32	0
52	59	2020-03-26	27	5	25	0
52	69	2020-03-26	46	18	21	1
52	79	2020-03-26	85	30	14	0
52	89	2020-03-26	72	2	11	15
52	90	2020-03-26	28	0	4	8
53	0	2020-03-26	202	45	114	29
53	9	2020-03-26	0	0	5	0
53	19	2020-03-26	1	0	1	0
53	29	2020-03-26	1	0	5	0
53	39	2020-03-26	10	1	8	0
53	49	2020-03-26	7	1	6	0
53	59	2020-03-26	26	13	19	0
53	69	2020-03-26	35	11	31	2
53	79	2020-03-26	65	15	28	7
53	89	2020-03-26	43	4	9	14
53	90	2020-03-26	12	0	2	6
75	0	2020-03-26	399	96	163	34
75	9	2020-03-26	0	0	8	0
75	19	2020-03-26	3	0	1	0
75	29	2020-03-26	8	1	21	0
75	39	2020-03-26	11	2	19	0
75	49	2020-03-26	30	9	20	0
75	59	2020-03-26	53	19	21	2
75	69	2020-03-26	75	23	21	5
75	79	2020-03-26	75	23	20	4
75	89	2020-03-26	104	15	21	14
75	90	2020-03-26	33	1	4	8
76	0	2020-03-26	551	177	224	54
76	9	2020-03-26	7	1	9	0
76	19	2020-03-26	1	0	4	0
76	29	2020-03-26	8	2	19	1
76	39	2020-03-26	20	6	31	0
76	49	2020-03-26	54	18	27	0
76	59	2020-03-26	84	33	50	2
76	69	2020-03-26	112	45	34	3
76	79	2020-03-26	163	64	35	10
76	89	2020-03-26	81	8	14	30
76	90	2020-03-26	21	0	1	8
84	0	2020-03-26	1422	290	496	133
84	9	2020-03-26	4	0	5	0
84	19	2020-03-26	0	0	3	0
84	29	2020-03-26	16	4	34	0
84	39	2020-03-26	26	6	54	2
84	49	2020-03-26	76	16	65	1
84	59	2020-03-26	143	46	82	4
84	69	2020-03-26	250	75	72	6
84	79	2020-03-26	373	103	95	34
84	89	2020-03-26	356	31	61	47
84	90	2020-03-26	141	0	13	38
93	0	2020-03-26	695	164	599	44
93	9	2020-03-26	2	0	9	0
93	19	2020-03-26	1	0	22	0
93	29	2020-03-26	18	2	72	1
93	39	2020-03-26	30	2	81	0
93	49	2020-03-26	63	14	116	0
93	59	2020-03-26	117	35	120	0
93	69	2020-03-26	146	41	95	4
93	79	2020-03-26	144	52	49	6
93	89	2020-03-26	103	11	26	26
93	90	2020-03-26	39	1	9	7
94	0	2020-03-26	95	13	63	19
94	9	2020-03-26	0	0	2	0
94	19	2020-03-26	0	0	3	0
94	29	2020-03-26	2	0	11	0
94	39	2020-03-26	2	0	7	0
94	49	2020-03-26	3	1	9	0
94	59	2020-03-26	13	4	11	1
94	69	2020-03-26	12	3	10	2
94	79	2020-03-26	26	4	2	3
94	89	2020-03-26	27	1	3	11
94	90	2020-03-26	10	0	4	2
01	0	2020-03-27	29	13	6	1
01	9	2020-03-27	0	0	0	0
01	19	2020-03-27	0	0	0	0
01	29	2020-03-27	0	0	0	0
01	39	2020-03-27	4	1	1	0
01	49	2020-03-27	2	0	0	0
01	59	2020-03-27	8	3	3	0
01	69	2020-03-27	9	4	0	0
01	79	2020-03-27	4	4	1	1
01	89	2020-03-27	2	1	1	0
01	90	2020-03-27	0	0	0	0
02	0	2020-03-27	44	15	13	1
02	9	2020-03-27	3	1	0	0
02	19	2020-03-27	0	0	0	0
02	29	2020-03-27	1	0	2	0
02	39	2020-03-27	2	0	2	0
02	49	2020-03-27	6	1	2	0
02	59	2020-03-27	10	5	6	0
02	69	2020-03-27	11	6	0	0
02	79	2020-03-27	6	0	1	0
02	89	2020-03-27	5	2	0	1
02	90	2020-03-27	0	0	0	0
03	0	2020-03-27	0	0	0	0
03	9	2020-03-27	0	0	0	0
03	19	2020-03-27	0	0	0	0
03	29	2020-03-27	0	0	0	0
03	39	2020-03-27	0	0	0	0
03	49	2020-03-27	0	0	0	0
03	59	2020-03-27	0	0	0	0
03	69	2020-03-27	0	0	0	0
03	79	2020-03-27	0	0	0	0
03	89	2020-03-27	0	0	0	0
03	90	2020-03-27	0	0	0	0
04	0	2020-03-27	3	2	0	0
04	9	2020-03-27	0	0	0	0
04	19	2020-03-27	0	0	0	0
04	29	2020-03-27	0	0	0	0
04	39	2020-03-27	0	0	0	0
04	49	2020-03-27	0	0	0	0
04	59	2020-03-27	0	0	0	0
04	69	2020-03-27	0	0	0	0
04	79	2020-03-27	2	1	0	0
04	89	2020-03-27	1	1	0	0
04	90	2020-03-27	0	0	0	0
06	0	2020-03-27	0	0	0	0
06	9	2020-03-27	0	0	0	0
06	19	2020-03-27	0	0	0	0
06	29	2020-03-27	0	0	0	0
06	39	2020-03-27	0	0	0	0
06	49	2020-03-27	0	0	0	0
06	59	2020-03-27	0	0	0	0
06	69	2020-03-27	0	0	0	0
06	79	2020-03-27	0	0	0	0
06	89	2020-03-27	0	0	0	0
06	90	2020-03-27	0	0	0	0
11	0	2020-03-27	5793	1389	1598	578
11	9	2020-03-27	16	5	46	0
11	19	2020-03-27	14	3	15	1
11	29	2020-03-27	83	16	98	0
11	39	2020-03-27	319	80	204	4
11	49	2020-03-27	544	147	236	10
11	59	2020-03-27	1058	371	332	30
11	69	2020-03-27	1234	410	299	78
11	79	2020-03-27	1157	293	202	135
11	89	2020-03-27	931	53	124	215
11	90	2020-03-27	381	2	30	96
24	0	2020-03-27	247	80	64	26
24	9	2020-03-27	0	0	1	0
24	19	2020-03-27	0	0	1	0
24	29	2020-03-27	3	1	1	0
24	39	2020-03-27	4	2	4	0
24	49	2020-03-27	27	10	10	0
24	59	2020-03-27	28	12	13	2
24	69	2020-03-27	49	27	13	1
24	79	2020-03-27	64	26	13	8
24	89	2020-03-27	50	2	6	8
24	90	2020-03-27	18	0	1	7
27	0	2020-03-27	740	186	432	139
27	9	2020-03-27	3	1	4	0
27	19	2020-03-27	4	0	4	0
27	29	2020-03-27	6	0	34	0
27	39	2020-03-27	14	3	59	0
27	49	2020-03-27	40	6	59	2
27	59	2020-03-27	92	34	76	3
27	69	2020-03-27	148	55	64	12
27	79	2020-03-27	175	65	60	39
27	89	2020-03-27	202	21	50	59
27	90	2020-03-27	55	1	22	24
28	0	2020-03-27	313	93	73	24
28	9	2020-03-27	0	0	1	0
28	19	2020-03-27	2	0	0	0
28	29	2020-03-27	3	0	8	0
28	39	2020-03-27	9	3	6	0
28	49	2020-03-27	20	4	9	0
28	59	2020-03-27	42	13	21	3
28	69	2020-03-27	66	28	12	3
28	79	2020-03-27	92	37	8	5
28	89	2020-03-27	63	8	8	7
28	90	2020-03-27	14	0	0	6
32	0	2020-03-27	993	302	401	169
32	9	2020-03-27	7	0	16	0
32	19	2020-03-27	1	0	3	0
32	29	2020-03-27	12	4	30	0
32	39	2020-03-27	34	7	51	0
32	49	2020-03-27	53	21	69	1
32	59	2020-03-27	140	57	68	5
32	69	2020-03-27	217	93	43	21
32	79	2020-03-27	239	94	59	49
32	89	2020-03-27	220	23	41	66
32	90	2020-03-27	64	0	20	26
44	0	2020-03-27	3290	699	1074	657
44	9	2020-03-27	9	0	58	0
44	19	2020-03-27	4	2	8	0
44	29	2020-03-27	40	7	45	0
44	39	2020-03-27	77	20	78	0
44	49	2020-03-27	172	51	90	4
44	59	2020-03-27	341	105	168	18
44	69	2020-03-27	683	229	204	57
44	79	2020-03-27	905	232	199	158
44	89	2020-03-27	755	37	151	276
44	90	2020-03-27	246	3	44	138
52	0	2020-03-27	371	84	141	31
52	9	2020-03-27	0	0	1	0
52	19	2020-03-27	0	0	1	0
52	29	2020-03-27	3	0	11	0
52	39	2020-03-27	8	2	9	0
52	49	2020-03-27	21	6	35	0
52	59	2020-03-27	39	8	26	0
52	69	2020-03-27	62	24	25	1
52	79	2020-03-27	112	42	15	2
52	89	2020-03-27	93	1	13	17
52	90	2020-03-27	30	0	5	11
53	0	2020-03-27	215	49	131	34
53	9	2020-03-27	0	0	5	0
53	19	2020-03-27	1	0	1	0
53	29	2020-03-27	2	0	5	0
53	39	2020-03-27	11	1	11	0
53	49	2020-03-27	9	2	6	0
53	59	2020-03-27	31	14	19	0
53	69	2020-03-27	37	13	33	2
53	79	2020-03-27	63	15	35	7
53	89	2020-03-27	47	4	13	17
53	90	2020-03-27	14	0	3	8
75	0	2020-03-27	482	116	191	42
75	9	2020-03-27	2	0	8	0
75	19	2020-03-27	2	0	3	0
75	29	2020-03-27	9	1	23	0
75	39	2020-03-27	11	2	23	0
75	49	2020-03-27	39	13	23	0
75	59	2020-03-27	68	22	26	2
75	69	2020-03-27	92	29	24	5
75	79	2020-03-27	96	30	23	6
75	89	2020-03-27	120	17	23	17
75	90	2020-03-27	39	0	6	10
76	0	2020-03-27	618	187	256	61
76	9	2020-03-27	7	1	10	0
76	19	2020-03-27	2	0	4	0
76	29	2020-03-27	11	3	20	1
76	39	2020-03-27	24	5	34	0
76	49	2020-03-27	58	17	32	0
76	59	2020-03-27	92	34	59	2
76	69	2020-03-27	131	51	41	3
76	79	2020-03-27	177	66	38	13
76	89	2020-03-27	93	10	17	33
76	90	2020-03-27	22	0	1	9
84	0	2020-03-27	1638	344	606	164
84	9	2020-03-27	6	0	5	0
84	19	2020-03-27	3	0	3	0
84	29	2020-03-27	19	3	42	0
84	39	2020-03-27	33	5	69	2
84	49	2020-03-27	94	21	80	3
84	59	2020-03-27	165	56	101	4
84	69	2020-03-27	292	94	92	8
84	79	2020-03-27	427	118	109	36
84	89	2020-03-27	403	36	77	63
84	90	2020-03-27	153	0	15	46
93	0	2020-03-27	823	186	642	48
93	9	2020-03-27	1	0	11	0
93	19	2020-03-27	2	0	21	0
93	29	2020-03-27	20	2	74	1
93	39	2020-03-27	33	2	91	0
93	49	2020-03-27	69	13	119	0
93	59	2020-03-27	138	42	125	1
93	69	2020-03-27	179	45	100	4
93	79	2020-03-27	180	61	56	6
93	89	2020-03-27	120	14	33	29
93	90	2020-03-27	50	1	10	7
94	0	2020-03-27	102	13	70	19
94	9	2020-03-27	0	0	2	0
94	19	2020-03-27	0	0	3	0
94	29	2020-03-27	1	0	13	0
94	39	2020-03-27	2	0	7	0
94	49	2020-03-27	2	1	11	0
94	59	2020-03-27	11	4	13	1
94	69	2020-03-27	15	3	11	2
94	79	2020-03-27	29	4	2	3
94	89	2020-03-27	31	1	3	11
94	90	2020-03-27	10	0	4	2
01	0	2020-03-28	44	13	9	1
01	9	2020-03-28	0	0	0	0
01	19	2020-03-28	0	0	0	0
01	29	2020-03-28	0	0	0	0
01	39	2020-03-28	4	1	1	0
01	49	2020-03-28	2	0	0	0
01	59	2020-03-28	11	3	4	0
01	69	2020-03-28	11	4	2	0
01	79	2020-03-28	5	4	1	1
01	89	2020-03-28	9	1	1	0
01	90	2020-03-28	1	0	0	0
02	0	2020-03-28	53	14	15	1
02	9	2020-03-28	3	1	0	0
02	19	2020-03-28	0	0	0	0
02	29	2020-03-28	2	0	2	0
02	39	2020-03-28	2	0	2	0
02	49	2020-03-28	8	1	2	0
02	59	2020-03-28	11	5	6	0
02	69	2020-03-28	14	5	1	0
[truncated: 27,899 more rows]
