# Supplementary material for: Beliefs and Risk Perceptions About COVID-19: Evidence From Two Successive French Representative Surveys During Lockdown
Source: Front Psychol. 2021 Feb 1;12:619145. doi: 10.3389/fpsyg.2021.619145 (PMC7882490; doi:10.3389/fpsyg.2021.619145)
Supplement: Supplementary file 2 [file Data_Sheet_1.ZIP › donnees-hospitalieres-covid19-2020-08-16-19h00.csv]

dep	sexe	jour	hosp	rea	rad	dc
01	0	2020-03-18	2	0	1	0
01	1	2020-03-18	1	0	1	0
01	2	2020-03-18	1	0	0	0
02	0	2020-03-18	41	10	18	11
02	1	2020-03-18	19	4	11	6
02	2	2020-03-18	22	6	7	5
03	0	2020-03-18	4	0	1	0
03	1	2020-03-18	1	0	0	0
03	2	2020-03-18	3	0	1	0
04	0	2020-03-18	3	1	2	0
04	1	2020-03-18	3	1	0	0
04	2	2020-03-18	0	0	2	0
05	0	2020-03-18	8	1	9	0
05	1	2020-03-18	1	0	7	0
05	2	2020-03-18	7	1	2	0
06	0	2020-03-18	25	1	47	2
06	1	2020-03-18	15	1	19	0
06	2	2020-03-18	10	0	28	2
07	0	2020-03-18	12	1	0	0
07	1	2020-03-18	7	1	0	0
07	2	2020-03-18	3	0	0	0
08	0	2020-03-18	0	0	1	0
08	1	2020-03-18	0	0	1	0
08	2	2020-03-18	0	0	0	0
09	0	2020-03-18	1	1	2	0
09	1	2020-03-18	0	0	1	0
09	2	2020-03-18	1	1	1	0
10	0	2020-03-18	5	0	0	0
10	1	2020-03-18	4	0	0	0
10	2	2020-03-18	1	0	0	0
11	0	2020-03-18	8	7	9	3
11	1	2020-03-18	6	5	2	2
11	2	2020-03-18	2	2	7	1
12	0	2020-03-18	7	2	1	0
12	1	2020-03-18	3	1	0	0
12	2	2020-03-18	4	1	1	0
13	0	2020-03-18	98	11	59	4
13	1	2020-03-18	50	6	35	2
13	2	2020-03-18	48	5	23	2
14	0	2020-03-18	4	1	0	0
14	1	2020-03-18	3	0	0	0
14	2	2020-03-18	1	1	0	0
15	0	2020-03-18	2	1	0	0
15	1	2020-03-18	2	1	0	0
15	2	2020-03-18	0	0	0	0
16	0	2020-03-18	1	0	0	0
16	1	2020-03-18	0	0	0	0
16	2	2020-03-18	1	0	0	0
17	0	2020-03-18	5	2	2	0
17	1	2020-03-18	5	2	2	0
17	2	2020-03-18	0	0	0	0
18	0	2020-03-18	0	0	0	0
18	1	2020-03-18	0	0	0	0
18	2	2020-03-18	0	0	0	0
19	0	2020-03-18	0	0	0	0
19	1	2020-03-18	0	0	0	0
19	2	2020-03-18	0	0	0	0
21	0	2020-03-18	60	16	4	0
21	1	2020-03-18	30	10	0	0
21	2	2020-03-18	30	6	4	0
22	0	2020-03-18	1	1	3	0
22	1	2020-03-18	1	1	1	0
22	2	2020-03-18	0	0	2	0
23	0	2020-03-18	0	0	0	0
23	1	2020-03-18	0	0	0	0
23	2	2020-03-18	0	0	0	0
24	0	2020-03-18	2	1	1	0
24	1	2020-03-18	1	1	1	0
24	2	2020-03-18	1	0	0	0
25	0	2020-03-18	26	3	8	1
25	1	2020-03-18	15	2	2	1
25	2	2020-03-18	11	1	6	0
26	0	2020-03-18	17	2	0	0
26	1	2020-03-18	10	1	0	0
26	2	2020-03-18	7	1	0	0
27	0	2020-03-18	0	0	0	0
27	1	2020-03-18	0	0	0	0
27	2	2020-03-18	0	0	0	0
28	0	2020-03-18	5	3	0	1
28	1	2020-03-18	1	1	0	1
28	2	2020-03-18	4	2	0	0
29	0	2020-03-18	13	5	3	0
29	1	2020-03-18	8	4	2	0
29	2	2020-03-18	5	1	1	0
2A	0	2020-03-18	0	0	0	0
2A	1	2020-03-18	0	0	0	0
2A	2	2020-03-18	0	0	0	0
2B	0	2020-03-18	0	0	0	0
2B	1	2020-03-18	0	0	0	0
2B	2	2020-03-18	0	0	0	0
30	0	2020-03-18	5	3	6	0
30	1	2020-03-18	5	3	1	0
30	2	2020-03-18	0	0	5	0
31	0	2020-03-18	23	5	11	0
31	1	2020-03-18	15	4	4	0
31	2	2020-03-18	8	1	7	0
32	0	2020-03-18	1	1	0	0
32	1	2020-03-18	1	1	0	0
32	2	2020-03-18	0	0	0	0
33	0	2020-03-18	7	4	3	1
33	1	2020-03-18	5	3	1	0
33	2	2020-03-18	2	1	2	1
34	0	2020-03-18	37	15	18	2
34	1	2020-03-18	18	7	9	1
34	2	2020-03-18	18	7	9	1
35	0	2020-03-18	7	3	0	0
35	1	2020-03-18	4	2	0	0
35	2	2020-03-18	3	1	0	0
36	0	2020-03-18	0	0	0	0
36	1	2020-03-18	0	0	0	0
36	2	2020-03-18	0	0	0	0
37	0	2020-03-18	4	1	0	0
37	1	2020-03-18	2	1	0	0
37	2	2020-03-18	2	0	0	0
38	0	2020-03-18	18	2	0	1
38	1	2020-03-18	10	1	0	1
38	2	2020-03-18	8	1	0	0
39	0	2020-03-18	2	1	1	0
39	1	2020-03-18	1	0	1	0
39	2	2020-03-18	1	1	0	0
40	0	2020-03-18	0	0	0	0
40	1	2020-03-18	0	0	0	0
40	2	2020-03-18	0	0	0	0
41	0	2020-03-18	0	0	0	0
41	1	2020-03-18	0	0	0	0
41	2	2020-03-18	0	0	0	0
42	0	2020-03-18	31	10	3	1
42	1	2020-03-18	21	9	2	1
42	2	2020-03-18	10	1	1	0
43	0	2020-03-18	1	1	5	0
43	1	2020-03-18	1	1	2	0
43	2	2020-03-18	0	0	3	0
44	0	2020-03-18	18	3	7	1
44	1	2020-03-18	14	3	3	0
44	2	2020-03-18	4	0	4	1
45	0	2020-03-18	5	1	0	0
45	1	2020-03-18	3	1	0	0
45	2	2020-03-18	2	0	0	0
46	0	2020-03-18	0	0	1	0
46	1	2020-03-18	0	0	0	0
46	2	2020-03-18	0	0	1	0
47	0	2020-03-18	10	4	1	0
47	1	2020-03-18	7	4	1	0
47	2	2020-03-18	3	0	0	0
48	0	2020-03-18	1	0	0	0
48	1	2020-03-18	0	0	0	0
48	2	2020-03-18	1	0	0	0
49	0	2020-03-18	12	1	26	0
49	1	2020-03-18	6	1	17	0
49	2	2020-03-18	6	0	9	0
50	0	2020-03-18	7	0	1	0
50	1	2020-03-18	4	0	0	0
50	2	2020-03-18	3	0	1	0
51	0	2020-03-18	35	7	6	1
51	1	2020-03-18	19	4	2	1
51	2	2020-03-18	16	3	4	0
52	0	2020-03-18	4	0	0	1
52	1	2020-03-18	2	0	0	0
52	2	2020-03-18	2	0	0	1
53	0	2020-03-18	4	0	2	0
53	1	2020-03-18	3	0	1	0
53	2	2020-03-18	1	0	1	0
54	0	2020-03-18	42	19	1	5
54	1	2020-03-18	23	13	0	2
54	2	2020-03-18	17	5	1	3
55	0	2020-03-18	11	3	0	0
55	1	2020-03-18	6	1	0	0
55	2	2020-03-18	5	2	0	0
56	0	2020-03-18	39	14	63	7
56	1	2020-03-18	22	10	28	5
56	2	2020-03-18	17	4	35	2
57	0	2020-03-18	169	34	11	16
57	1	2020-03-18	96	26	6	7
57	2	2020-03-18	73	8	5	9
58	0	2020-03-18	0	0	0	0
58	1	2020-03-18	0	0	0	0
58	2	2020-03-18	0	0	0	0
59	0	2020-03-18	106	26	16	3
59	1	2020-03-18	61	19	10	2
59	2	2020-03-18	44	7	6	1
60	0	2020-03-18	94	22	18	6
60	1	2020-03-18	54	16	11	3
60	2	2020-03-18	40	6	7	3
61	0	2020-03-18	4	0	2	0
61	1	2020-03-18	1	0	1	0
61	2	2020-03-18	3	0	1	0
62	0	2020-03-18	22	9	16	0
62	1	2020-03-18	10	6	12	0
62	2	2020-03-18	12	3	4	0
63	0	2020-03-18	10	2	3	0
63	1	2020-03-18	7	2	2	0
63	2	2020-03-18	3	0	1	0
64	0	2020-03-18	5	0	0	0
64	1	2020-03-18	2	0	0	0
64	2	2020-03-18	3	0	0	0
65	0	2020-03-18	0	0	0	0
65	1	2020-03-18	0	0	0	0
65	2	2020-03-18	0	0	0	0
66	0	2020-03-18	9	5	1	0
66	1	2020-03-18	7	4	0	0
66	2	2020-03-18	2	1	1	0
67	0	2020-03-18	210	58	4	15
67	1	2020-03-18	108	37	3	7
67	2	2020-03-18	99	21	1	8
68	0	2020-03-18	371	77	116	74
68	1	2020-03-18	203	50	67	38
68	2	2020-03-18	164	27	47	35
69	0	2020-03-18	36	8	10	0
69	1	2020-03-18	14	1	4	0
69	2	2020-03-18	12	5	6	0
70	0	2020-03-18	14	4	2	0
70	1	2020-03-18	7	2	0	0
70	2	2020-03-18	7	2	2	0
71	0	2020-03-18	35	0	4	5
71	1	2020-03-18	13	0	2	3
71	2	2020-03-18	22	0	2	2
72	0	2020-03-18	9	0	1	0
72	1	2020-03-18	3	0	0	0
72	2	2020-03-18	6	0	1	0
73	0	2020-03-18	8	0	3	0
73	1	2020-03-18	2	0	2	0
73	2	2020-03-18	6	0	1	0
74	0	2020-03-18	31	8	43	5
74	1	2020-03-18	15	5	24	2
74	2	2020-03-18	9	0	18	3
75	0	2020-03-18	359	105	40	14
75	1	2020-03-18	217	70	22	10
75	2	2020-03-18	139	35	18	4
76	0	2020-03-18	30	3	3	3
76	1	2020-03-18	17	2	1	3
76	2	2020-03-18	13	1	2	0
77	0	2020-03-18	25	13	10	0
77	1	2020-03-18	15	12	6	0
77	2	2020-03-18	10	1	4	0
78	0	2020-03-18	69	18	5	5
78	1	2020-03-18	34	11	2	4
78	2	2020-03-18	35	7	3	1
79	0	2020-03-18	2	1	2	0
79	1	2020-03-18	1	1	1	0
79	2	2020-03-18	1	0	1	0
80	0	2020-03-18	50	20	9	1
80	1	2020-03-18	27	12	5	0
80	2	2020-03-18	22	8	4	1
81	0	2020-03-18	2	0	2	0
81	1	2020-03-18	1	0	2	0
81	2	2020-03-18	1	0	0	0
82	0	2020-03-18	1	0	0	1
82	1	2020-03-18	0	0	0	1
82	2	2020-03-18	1	0	0	0
83	0	2020-03-18	23	7	78	0
83	1	2020-03-18	12	6	39	0
83	2	2020-03-18	11	1	39	0
84	0	2020-03-18	9	3	7	1
84	1	2020-03-18	4	2	6	0
84	2	2020-03-18	5	1	1	1
85	0	2020-03-18	1	0	0	0
85	1	2020-03-18	0	0	0	0
85	2	2020-03-18	1	0	0	0
86	0	2020-03-18	7	0	0	1
86	1	2020-03-18	1	0	0	0
86	2	2020-03-18	6	0	0	1
87	0	2020-03-18	2	0	2	0
87	1	2020-03-18	1	0	0	0
87	2	2020-03-18	1	0	2	0
88	0	2020-03-18	32	6	7	8
88	1	2020-03-18	19	5	2	4
88	2	2020-03-18	13	1	5	4
89	0	2020-03-18	6	0	1	0
89	1	2020-03-18	5	0	1	0
89	2	2020-03-18	1	0	0	0
90	0	2020-03-18	25	9	0	0
90	1	2020-03-18	13	6	0	0
90	2	2020-03-18	12	3	0	0
91	0	2020-03-18	51	16	0	1
91	1	2020-03-18	35	11	0	0
91	2	2020-03-18	16	5	0	1
92	0	2020-03-18	149	48	22	4
92	1	2020-03-18	92	35	12	4
92	2	2020-03-18	55	13	10	0
93	0	2020-03-18	92	33	15	5
93	1	2020-03-18	59	21	9	3
93	2	2020-03-18	33	12	6	2
94	0	2020-03-18	122	32	16	5
94	1	2020-03-18	76	24	15	5
94	2	2020-03-18	44	8	1	0
95	0	2020-03-18	90	29	21	2
95	1	2020-03-18	64	23	8	2
95	2	2020-03-18	25	6	12	0
971	0	2020-03-18	0	0	0	0
971	1	2020-03-18	0	0	0	0
971	2	2020-03-18	0	0	0	0
972	0	2020-03-18	16	5	0	1
972	1	2020-03-18	9	3	0	0
972	2	2020-03-18	7	2	0	1
973	0	2020-03-18	0	0	0	0
973	1	2020-03-18	0	0	0	0
973	2	2020-03-18	0	0	0	0
974	0	2020-03-18	2	2	0	0
974	1	2020-03-18	2	2	0	0
974	2	2020-03-18	0	0	0	0
976	0	2020-03-18	0	0	0	0
976	1	2020-03-18	0	0	0	0
976	2	2020-03-18	0	0	0	0
01	0	2020-03-19	2	0	1	0
01	1	2020-03-19	1	0	1	0
01	2	2020-03-19	1	0	0	0
02	0	2020-03-19	43	15	33	19
02	1	2020-03-19	23	7	16	13
02	2	2020-03-19	20	8	17	6
03	0	2020-03-19	0	0	7	0
03	1	2020-03-19	0	0	2	0
03	2	2020-03-19	0	0	5	0
04	0	2020-03-19	3	1	3	0
04	1	2020-03-19	3	1	1	0
04	2	2020-03-19	0	0	2	0
05	0	2020-03-19	10	1	10	0
05	1	2020-03-19	3	0	8	0
05	2	2020-03-19	7	1	2	0
06	0	2020-03-19	33	5	48	2
06	1	2020-03-19	21	4	19	0
06	2	2020-03-19	11	0	29	2
07	0	2020-03-19	11	2	0	0
07	1	2020-03-19	6	1	0	0
07	2	2020-03-19	3	0	0	0
08	0	2020-03-19	0	0	1	0
08	1	2020-03-19	0	0	1	0
08	2	2020-03-19	0	0	0	0
09	0	2020-03-19	1	1	2	0
09	1	2020-03-19	0	0	1	0
09	2	2020-03-19	1	1	1	0
10	0	2020-03-19	6	1	0	0
10	1	2020-03-19	5	0	0	0
10	2	2020-03-19	1	1	0	0
11	0	2020-03-19	18	11	8	6
11	1	2020-03-19	12	7	2	3
11	2	2020-03-19	6	4	6	3
12	0	2020-03-19	9	2	2	1
12	1	2020-03-19	3	1	0	1
12	2	2020-03-19	6	1	2	0
13	0	2020-03-19	128	20	97	4
13	1	2020-03-19	63	11	54	2
13	2	2020-03-19	65	9	42	2
14	0	2020-03-19	4	1	1	0
14	1	2020-03-19	3	0	0	0
14	2	2020-03-19	1	1	1	0
15	0	2020-03-19	3	1	0	0
15	1	2020-03-19	3	1	0	0
15	2	2020-03-19	0	0	0	0
16	0	2020-03-19	0	0	2	0
16	1	2020-03-19	0	0	1	0
16	2	2020-03-19	0	0	1	0
17	0	2020-03-19	7	2	2	0
17	1	2020-03-19	7	2	2	0
17	2	2020-03-19	0	0	0	0
18	0	2020-03-19	0	0	0	0
18	1	2020-03-19	0	0	0	0
18	2	2020-03-19	0	0	0	0
19	0	2020-03-19	1	0	0	0
19	1	2020-03-19	1	0	0	0
19	2	2020-03-19	0	0	0	0
21	0	2020-03-19	53	19	28	2
21	1	2020-03-19	30	13	9	0
21	2	2020-03-19	23	6	18	2
22	0	2020-03-19	2	1	3	0
22	1	2020-03-19	2	1	1	0
22	2	2020-03-19	0	0	2	0
23	0	2020-03-19	0	0	0	0
23	1	2020-03-19	0	0	0	0
23	2	2020-03-19	0	0	0	0
24	0	2020-03-19	2	1	1	0
24	1	2020-03-19	1	1	1	0
24	2	2020-03-19	1	0	0	0
25	0	2020-03-19	33	11	10	2
25	1	2020-03-19	22	10	2	1
25	2	2020-03-19	11	1	8	1
26	0	2020-03-19	32	8	2	0
26	1	2020-03-19	18	5	1	0
26	2	2020-03-19	14	3	1	0
27	0	2020-03-19	1	1	0	1
27	1	2020-03-19	1	1	0	1
27	2	2020-03-19	0	0	0	0
28	0	2020-03-19	11	4	0	1
28	1	2020-03-19	5	2	0	1
28	2	2020-03-19	6	2	0	0
29	0	2020-03-19	17	5	6	0
29	1	2020-03-19	9	4	3	0
29	2	2020-03-19	8	1	3	0
2A	0	2020-03-19	1	0	1	1
2A	1	2020-03-19	1	0	1	0
2A	2	2020-03-19	0	0	0	1
2B	0	2020-03-19	0	0	0	0
2B	1	2020-03-19	0	0	0	0
2B	2	2020-03-19	0	0	0	0
30	0	2020-03-19	4	1	7	1
30	1	2020-03-19	4	1	2	1
30	2	2020-03-19	0	0	5	0
31	0	2020-03-19	26	6	13	1
31	1	2020-03-19	18	5	5	0
31	2	2020-03-19	8	1	8	1
32	0	2020-03-19	3	3	0	0
32	1	2020-03-19	3	3	0	0
32	2	2020-03-19	0	0	0	0
33	0	2020-03-19	7	5	7	2
33	1	2020-03-19	5	4	3	1
33	2	2020-03-19	2	1	4	1
34	0	2020-03-19	49	18	21	4
34	1	2020-03-19	26	11	11	2
34	2	2020-03-19	23	7	10	2
35	0	2020-03-19	16	8	15	0
35	1	2020-03-19	12	6	6	0
35	2	2020-03-19	4	2	9	0
36	0	2020-03-19	3	0	0	0
36	1	2020-03-19	2	0	0	0
36	2	2020-03-19	1	0	0	0
37	0	2020-03-19	6	3	0	0
37	1	2020-03-19	4	2	0	0
37	2	2020-03-19	2	1	0	0
38	0	2020-03-19	22	2	3	1
38	1	2020-03-19	12	1	1	1
38	2	2020-03-19	10	1	2	0
39	0	2020-03-19	2	1	1	0
39	1	2020-03-19	1	0	1	0
39	2	2020-03-19	1	1	0	0
40	0	2020-03-19	0	0	0	0
40	1	2020-03-19	0	0	0	0
40	2	2020-03-19	0	0	0	0
41	0	2020-03-19	2	0	1	0
41	1	2020-03-19	0	0	1	0
41	2	2020-03-19	2	0	0	0
42	0	2020-03-19	48	18	8	3
42	1	2020-03-19	33	16	6	3
42	2	2020-03-19	15	2	2	0
43	0	2020-03-19	1	1	5	0
43	1	2020-03-19	1	1	2	0
43	2	2020-03-19	0	0	3	0
44	0	2020-03-19	24	6	9	1
44	1	2020-03-19	17	4	5	0
44	2	2020-03-19	7	2	4	1
45	0	2020-03-19	9	3	0	0
45	1	2020-03-19	6	3	0	0
45	2	2020-03-19	3	0	0	0
46	0	2020-03-19	0	0	1	0
46	1	2020-03-19	0	0	0	0
46	2	2020-03-19	0	0	1	0
47	0	2020-03-19	10	1	1	0
47	1	2020-03-19	7	1	1	0
47	2	2020-03-19	3	0	0	0
48	0	2020-03-19	1	0	0	0
48	1	2020-03-19	0	0	0	0
48	2	2020-03-19	1	0	0	0
49	0	2020-03-19	16	3	28	0
49	1	2020-03-19	7	2	17	0
49	2	2020-03-19	9	1	11	0
50	0	2020-03-19	6	0	2	0
50	1	2020-03-19	3	0	1	0
50	2	2020-03-19	3	0	1	0
51	0	2020-03-19	39	7	14	2
51	1	2020-03-19	21	4	6	1
51	2	2020-03-19	18	3	8	1
52	0	2020-03-19	4	0	0	1
52	1	2020-03-19	2	0	0	0
52	2	2020-03-19	2	0	0	1
53	0	2020-03-19	5	1	3	0
53	1	2020-03-19	4	1	1	0
53	2	2020-03-19	1	0	2	0
54	0	2020-03-19	54	23	1	6
54	1	2020-03-19	31	16	0	2
54	2	2020-03-19	20	6	1	4
55	0	2020-03-19	35	3	4	0
55	1	2020-03-19	17	0	1	0
55	2	2020-03-19	18	3	3	0
56	0	2020-03-19	42	12	53	9
56	1	2020-03-19	26	9	22	5
56	2	2020-03-19	16	3	31	4
57	0	2020-03-19	194	46	15	19
57	1	2020-03-19	109	36	8	8
57	2	2020-03-19	84	10	7	11
58	0	2020-03-19	0	0	0	0
58	1	2020-03-19	0	0	0	0
58	2	2020-03-19	0	0	0	0
59	0	2020-03-19	138	35	36	5
59	1	2020-03-19	83	27	23	3
59	2	2020-03-19	55	8	13	2
60	0	2020-03-19	109	21	23	14
60	1	2020-03-19	59	15	15	9
60	2	2020-03-19	50	6	8	5
61	0	2020-03-19	2	0	3	0
61	1	2020-03-19	1	0	1	0
61	2	2020-03-19	1	0	2	0
62	0	2020-03-19	30	11	25	0
62	1	2020-03-19	18	8	15	0
62	2	2020-03-19	12	3	10	0
63	0	2020-03-19	9	1	4	0
63	1	2020-03-19	7	1	2	0
63	2	2020-03-19	2	0	2	0
64	0	2020-03-19	9	0	1	0
64	1	2020-03-19	5	0	0	0
64	2	2020-03-19	4	0	1	0
65	0	2020-03-19	2	1	0	0
65	1	2020-03-19	2	1	0	0
65	2	2020-03-19	0	0	0	0
66	0	2020-03-19	19	11	3	3
66	1	2020-03-19	9	7	2	1
66	2	2020-03-19	10	4	1	2
67	0	2020-03-19	302	82	13	18
67	1	2020-03-19	159	59	8	9
67	2	2020-03-19	137	23	5	9
68	0	2020-03-19	437	73	131	91
68	1	2020-03-19	241	49	75	47
68	2	2020-03-19	192	24	54	43
69	0	2020-03-19	210	33	48	12
69	1	2020-03-19	35	6	6	0
69	2	2020-03-19	24	5	11	1
70	0	2020-03-19	14	3	3	0
70	1	2020-03-19	7	1	0	0
70	2	2020-03-19	7	2	3	0
71	0	2020-03-19	48	3	7	5
71	1	2020-03-19	19	3	2	3
71	2	2020-03-19	29	0	5	2
72	0	2020-03-19	8	0	5	0
72	1	2020-03-19	2	0	2	0
72	2	2020-03-19	6	0	3	0
73	0	2020-03-19	10	2	5	0
73	1	2020-03-19	4	2	2	0
73	2	2020-03-19	6	0	3	0
74	0	2020-03-19	37	11	49	6
74	1	2020-03-19	21	8	27	2
74	2	2020-03-19	10	0	20	4
75	0	2020-03-19	453	122	62	22
75	1	2020-03-19	279	85	31	16
75	2	2020-03-19	170	37	30	6
76	0	2020-03-19	33	4	3	4
76	1	2020-03-19	20	3	1	4
76	2	2020-03-19	13	1	2	0
77	0	2020-03-19	48	13	15	0
77	1	2020-03-19	31	10	7	0
77	2	2020-03-19	17	3	8	0
78	0	2020-03-19	92	20	7	6
78	1	2020-03-19	50	13	2	5
78	2	2020-03-19	42	7	5	1
79	0	2020-03-19	3	1	3	0
79	1	2020-03-19	1	1	1	0
79	2	2020-03-19	2	0	2	0
80	0	2020-03-19	74	23	12	2
80	1	2020-03-19	38	15	7	1
80	2	2020-03-19	35	8	5	1
81	0	2020-03-19	5	1	2	0
81	1	2020-03-19	2	0	2	0
81	2	2020-03-19	3	1	0	0
82	0	2020-03-19	1	0	0	1
82	1	2020-03-19	0	0	0	1
82	2	2020-03-19	1	0	0	0
83	0	2020-03-19	27	13	86	2
83	1	2020-03-19	20	10	41	1
83	2	2020-03-19	7	3	45	1
84	0	2020-03-19	12	4	9	1
84	1	2020-03-19	6	2	6	0
84	2	2020-03-19	6	2	3	1
85	0	2020-03-19	5	1	5	0
85	1	2020-03-19	2	0	2	0
85	2	2020-03-19	3	1	3	0
86	0	2020-03-19	7	0	0	1
86	1	2020-03-19	1	0	0	0
86	2	2020-03-19	6	0	0	1
87	0	2020-03-19	6	1	2	0
87	1	2020-03-19	3	1	0	0
87	2	2020-03-19	3	0	2	0
88	0	2020-03-19	38	6	8	11
88	1	2020-03-19	21	4	3	7
88	2	2020-03-19	17	2	5	4
89	0	2020-03-19	5	1	1	2
89	1	2020-03-19	4	1	1	1
89	2	2020-03-19	1	0	0	1
90	0	2020-03-19	39	9	0	3
90	1	2020-03-19	24	8	0	1
90	2	2020-03-19	15	1	0	2
91	0	2020-03-19	82	22	4	1
91	1	2020-03-19	53	15	2	0
91	2	2020-03-19	29	7	2	1
92	0	2020-03-19	206	54	31	7
92	1	2020-03-19	116	42	16	6
92	2	2020-03-19	89	12	15	1
93	0	2020-03-19	143	45	21	5
93	1	2020-03-19	82	24	12	3
93	2	2020-03-19	59	20	9	2
94	0	2020-03-19	182	47	41	10
94	1	2020-03-19	108	35	22	8
94	2	2020-03-19	72	12	19	2
95	0	2020-03-19	150	37	32	5
95	1	2020-03-19	98	30	18	5
95	2	2020-03-19	51	7	14	0
971	0	2020-03-19	0	0	0	0
971	1	2020-03-19	0	0	0	0
971	2	2020-03-19	0	0	0	0
972	0	2020-03-19	17	5	0	1
972	1	2020-03-19	9	3	0	0
972	2	2020-03-19	8	2	0	1
973	0	2020-03-19	0	0	0	0
973	1	2020-03-19	0	0	0	0
973	2	2020-03-19	0	0	0	0
974	0	2020-03-19	2	2	0	0
974	1	2020-03-19	2	2	0	0
974	2	2020-03-19	0	0	0	0
976	0	2020-03-19	0	0	0	0
976	1	2020-03-19	0	0	0	0
976	2	2020-03-19	0	0	0	0
01	0	2020-03-20	2	0	1	0
01	1	2020-03-20	1	0	1	0
01	2	2020-03-20	1	0	0	0
02	0	2020-03-20	52	19	40	24
02	1	2020-03-20	30	10	18	16
02	2	2020-03-20	22	9	22	8
03	0	2020-03-20	1	0	10	0
03	1	2020-03-20	1	0	4	0
03	2	2020-03-20	0	0	6	0
04	0	2020-03-20	3	1	3	0
04	1	2020-03-20	3	1	1	0
04	2	2020-03-20	0	0	2	0
05	0	2020-03-20	13	1	10	0
05	1	2020-03-20	5	0	8	0
05	2	2020-03-20	8	1	2	0
06	0	2020-03-20	43	7	61	4
06	1	2020-03-20	25	6	26	1
06	2	2020-03-20	16	0	34	3
07	0	2020-03-20	15	3	3	1
07	1	2020-03-20	8	2	0	1
07	2	2020-03-20	5	0	3	0
08	0	2020-03-20	1	1	1	0
08	1	2020-03-20	0	0	1	0
08	2	2020-03-20	1	1	0	0
09	0	2020-03-20	2	1	2	0
09	1	2020-03-20	1	0	1	0
09	2	2020-03-20	1	1	1	0
10	0	2020-03-20	12	2	0	0
10	1	2020-03-20	9	1	0	0
10	2	2020-03-20	3	1	0	0
11	0	2020-03-20	26	11	13	8
11	1	2020-03-20	20	8	3	5
11	2	2020-03-20	6	3	10	3
12	0	2020-03-20	12	2	3	1
12	1	2020-03-20	3	1	1	1
12	2	2020-03-20	9	1	2	0
13	0	2020-03-20	174	26	108	4
13	1	2020-03-20	83	16	58	2
13	2	2020-03-20	90	10	49	2
14	0	2020-03-20	4	1	3	1
14	1	2020-03-20	2	0	2	1
14	2	2020-03-20	2	1	1	0
15	0	2020-03-20	4	1	0	0
15	1	2020-03-20	3	1	0	0
15	2	2020-03-20	1	0	0	0
16	0	2020-03-20	1	0	2	0
16	1	2020-03-20	1	0	1	0
16	2	2020-03-20	0	0	1	0
17	0	2020-03-20	9	3	2	0
17	1	2020-03-20	8	3	2	0
17	2	2020-03-20	1	0	0	0
18	0	2020-03-20	0	0	0	0
18	1	2020-03-20	0	0	0	0
18	2	2020-03-20	0	0	0	0
19	0	2020-03-20	1	0	0	0
19	1	2020-03-20	1	0	0	0
19	2	2020-03-20	0	0	0	0
21	0	2020-03-20	82	31	37	3
21	1	2020-03-20	41	20	14	1
21	2	2020-03-20	41	11	22	2
22	0	2020-03-20	5	0	3	1
22	1	2020-03-20	2	0	1	1
22	2	2020-03-20	3	0	2	0
23	0	2020-03-20	0	0	0	0
23	1	2020-03-20	0	0	0	0
23	2	2020-03-20	0	0	0	0
24	0	2020-03-20	3	3	2	0
24	1	2020-03-20	3	3	1	0
24	2	2020-03-20	0	0	1	0
25	0	2020-03-20	43	15	13	4
25	1	2020-03-20	29	14	4	3
25	2	2020-03-20	14	1	9	1
26	0	2020-03-20	38	9	2	2
26	1	2020-03-20	22	6	1	1
26	2	2020-03-20	16	3	1	1
27	0	2020-03-20	4	1	0	1
27	1	2020-03-20	4	1	0	1
27	2	2020-03-20	0	0	0	0
28	0	2020-03-20	12	2	0	1
28	1	2020-03-20	5	1	0	1
28	2	2020-03-20	7	1	0	0
29	0	2020-03-20	20	4	6	1
29	1	2020-03-20	9	3	3	1
29	2	2020-03-20	11	1	3	0
2A	0	2020-03-20	60	14	10	3
2A	1	2020-03-20	35	9	7	1
2A	2	2020-03-20	25	5	3	2
2B	0	2020-03-20	6	0	23	0
2B	1	2020-03-20	3	0	11	0
2B	2	2020-03-20	3	0	12	0
30	0	2020-03-20	8	1	7	1
30	1	2020-03-20	7	1	2	1
30	2	2020-03-20	1	0	5	0
31	0	2020-03-20	35	10	16	2
31	1	2020-03-20	26	9	6	1
31	2	2020-03-20	9	1	10	1
32	0	2020-03-20	3	3	0	0
32	1	2020-03-20	3	3	0	0
32	2	2020-03-20	0	0	0	0
33	0	2020-03-20	10	5	12	2
33	1	2020-03-20	5	4	7	1
33	2	2020-03-20	5	1	5	1
34	0	2020-03-20	61	21	24	4
34	1	2020-03-20	30	12	11	1
34	2	2020-03-20	30	9	13	3
35	0	2020-03-20	20	9	17	1
35	1	2020-03-20	16	7	7	1
35	2	2020-03-20	4	2	10	0
36	0	2020-03-20	4	1	0	0
36	1	2020-03-20	3	1	0	0
36	2	2020-03-20	1	0	0	0
37	0	2020-03-20	12	5	0	1
37	1	2020-03-20	8	4	0	1
37	2	2020-03-20	4	1	0	0
38	0	2020-03-20	27	2	10	1
38	1	2020-03-20	13	1	5	1
38	2	2020-03-20	14	1	5	0
39	0	2020-03-20	6	1	2	0
39	1	2020-03-20	4	0	2	0
39	2	2020-03-20	2	1	0	0
40	0	2020-03-20	0	0	0	0
40	1	2020-03-20	0	0	0	0
40	2	2020-03-20	0	0	0	0
41	0	2020-03-20	4	0	0	0
41	1	2020-03-20	1	0	0	0
41	2	2020-03-20	3	0	0	0
42	0	2020-03-20	63	17	9	4
42	1	2020-03-20	45	15	6	3
42	2	2020-03-20	18	2	3	1
43	0	2020-03-20	2	2	6	0
43	1	2020-03-20	2	2	2	0
43	2	2020-03-20	0	0	4	0
44	0	2020-03-20	30	10	11	1
44	1	2020-03-20	17	7	7	0
44	2	2020-03-20	13	3	4	1
45	0	2020-03-20	26	5	2	0
45	1	2020-03-20	15	4	1	0
45	2	2020-03-20	11	1	1	0
46	0	2020-03-20	0	0	2	0
46	1	2020-03-20	0	0	1	0
46	2	2020-03-20	0	0	1	0
47	0	2020-03-20	10	1	1	0
47	1	2020-03-20	7	1	1	0
47	2	2020-03-20	3	0	0	0
48	0	2020-03-20	1	0	0	0
48	1	2020-03-20	0	0	0	0
48	2	2020-03-20	1	0	0	0
49	0	2020-03-20	22	4	38	0
49	1	2020-03-20	13	3	20	0
49	2	2020-03-20	9	1	18	0
50	0	2020-03-20	12	4	2	0
50	1	2020-03-20	5	1	1	0
50	2	2020-03-20	7	3	1	0
51	0	2020-03-20	54	11	26	2
51	1	2020-03-20	32	6	10	1
51	2	2020-03-20	22	5	15	1
52	0	2020-03-20	8	0	5	4
52	1	2020-03-20	2	0	1	2
52	2	2020-03-20	6	0	4	2
53	0	2020-03-20	7	2	3	0
53	1	2020-03-20	6	2	1	0
53	2	2020-03-20	1	0	2	0
54	0	2020-03-20	65	26	2	7
54	1	2020-03-20	38	18	0	3
54	2	2020-03-20	25	7	2	4
55	0	2020-03-20	46	5	6	0
55	1	2020-03-20	21	2	2	0
55	2	2020-03-20	25	3	4	0
56	0	2020-03-20	49	12	29	9
56	1	2020-03-20	28	9	14	5
56	2	2020-03-20	21	3	15	4
57	0	2020-03-20	257	61	24	23
57	1	2020-03-20	139	46	10	8
57	2	2020-03-20	116	15	13	15
58	0	2020-03-20	1	1	0	0
58	1	2020-03-20	1	1	0	0
58	2	2020-03-20	0	0	0	0
59	0	2020-03-20	112	39	35	5
59	1	2020-03-20	65	28	24	1
59	2	2020-03-20	47	11	11	4
60	0	2020-03-20	123	28	30	18
60	1	2020-03-20	67	20	18	12
60	2	2020-03-20	56	8	12	6
61	0	2020-03-20	3	1	4	0
61	1	2020-03-20	2	1	1	0
61	2	2020-03-20	1	0	3	0
62	0	2020-03-20	50	20	35	1
62	1	2020-03-20	30	14	21	0
62	2	2020-03-20	20	6	14	1
63	0	2020-03-20	4	1	9	0
63	1	2020-03-20	4	1	5	0
63	2	2020-03-20	0	0	4	0
64	0	2020-03-20	8	0	2	1
64	1	2020-03-20	5	0	0	1
64	2	2020-03-20	3	0	2	0
65	0	2020-03-20	2	1	0	0
65	1	2020-03-20	2	1	0	0
65	2	2020-03-20	0	0	0	0
66	0	2020-03-20	26	15	3	4
66	1	2020-03-20	13	9	2	1
66	2	2020-03-20	13	6	1	3
67	0	2020-03-20	366	92	42	28
67	1	2020-03-20	195	68	19	15
67	2	2020-03-20	168	24	23	13
68	0	2020-03-20	509	91	170	105
68	1	2020-03-20	288	64	93	55
68	2	2020-03-20	212	27	74	49
69	0	2020-03-20	236	41	68	19
69	1	2020-03-20	69	15	13	6
69	2	2020-03-20	46	7	22	6
70	0	2020-03-20	26	6	5	0
70	1	2020-03-20	14	2	1	0
70	2	2020-03-20	12	4	4	0
71	0	2020-03-20	53	5	10	8
71	1	2020-03-20	23	3	4	4
71	2	2020-03-20	30	2	6	4
72	0	2020-03-20	8	0	5	0
72	1	2020-03-20	2	0	2	0
72	2	2020-03-20	6	0	3	0
73	0	2020-03-20	17	2	8	0
73	1	2020-03-20	9	2	3	0
73	2	2020-03-20	7	0	5	0
74	0	2020-03-20	54	9	53	6
74	1	2020-03-20	25	6	30	2
74	2	2020-03-20	15	0	20	4
75	0	2020-03-20	575	145	98	30
75	1	2020-03-20	341	102	53	21
75	2	2020-03-20	226	42	44	9
76	0	2020-03-20	48	6	5	5
76	1	2020-03-20	30	5	3	5
76	2	2020-03-20	18	1	2	0
77	0	2020-03-20	79	31	21	2
77	1	2020-03-20	53	26	11	1
77	2	2020-03-20	26	5	10	1
78	0	2020-03-20	136	33	16	12
78	1	2020-03-20	73	21	7	6
78	2	2020-03-20	63	12	9	5
79	0	2020-03-20	5	1	8	0
79	1	2020-03-20	2	1	3	0
79	2	2020-03-20	3	0	5	0
80	0	2020-03-20	95	30	16	3
80	1	2020-03-20	45	17	10	2
80	2	2020-03-20	45	12	6	1
81	0	2020-03-20	6	1	3	0
81	1	2020-03-20	1	0	3	0
81	2	2020-03-20	5	1	0	0
82	0	2020-03-20	1	0	0	1
82	1	2020-03-20	0	0	0	1
82	2	2020-03-20	1	0	0	0
83	0	2020-03-20	35	17	88	2
83	1	2020-03-20	23	13	42	1
83	2	2020-03-20	12	4	46	1
84	0	2020-03-20	13	3	10	1
84	1	2020-03-20	7	1	7	0
84	2	2020-03-20	6	2	3	1
85	0	2020-03-20	6	1	5	0
85	1	2020-03-20	3	0	2	0
85	2	2020-03-20	3	1	3	0
86	0	2020-03-20	11	0	0	1
86	1	2020-03-20	2	0	0	0
86	2	2020-03-20	9	0	0	1
87	0	2020-03-20	7	2	2	0
87	1	2020-03-20	3	1	0	0
87	2	2020-03-20	4	1	2	0
88	0	2020-03-20	46	5	8	14
88	1	2020-03-20	24	4	3	9
88	2	2020-03-20	22	1	5	5
89	0	2020-03-20	10	3	1	2
89	1	2020-03-20	7	2	1	1
89	2	2020-03-20	3	1	0	1
90	0	2020-03-20	49	9	0	5
90	1	2020-03-20	30	7	0	2
90	2	2020-03-20	19	2	0	3
91	0	2020-03-20	122	28	7	3
91	1	2020-03-20	75	20	4	2
91	2	2020-03-20	46	8	3	1
92	0	2020-03-20	254	74	50	11
92	1	2020-03-20	153	59	20	9
92	2	2020-03-20	100	15	29	2
93	0	2020-03-20	201	62	35	19
93	1	2020-03-20	118	38	20	9
93	2	2020-03-20	80	22	15	9
94	0	2020-03-20	226	60	67	12
94	1	2020-03-20	133	45	35	9
94	2	2020-03-20	90	14	32	3
95	0	2020-03-20	192	51	56	10
95	1	2020-03-20	120	39	31	9
95	2	2020-03-20	71	12	25	1
971	0	2020-03-20	0	0	0	0
971	1	2020-03-20	0	0	0	0
971	2	2020-03-20	0	0	0	0
972	0	2020-03-20	19	5	0	1
972	1	2020-03-20	10	3	0	0
972	2	2020-03-20	9	2	0	1
973	0	2020-03-20	0	0	0	0
973	1	2020-03-20	0	0	0	0
973	2	2020-03-20	0	0	0	0
974	0	2020-03-20	2	2	0	0
974	1	2020-03-20	2	2	0	0
974	2	2020-03-20	0	0	0	0
976	0	2020-03-20	0	0	0	0
976	1	2020-03-20	0	0	0	0
976	2	2020-03-20	0	0	0	0
01	0	2020-03-21	4	0	1	0
01	1	2020-03-21	1	0	1	0
01	2	2020-03-21	3	0	0	0
02	0	2020-03-21	61	20	49	25
02	1	2020-03-21	31	9	20	17
02	2	2020-03-21	30	11	29	8
03	0	2020-03-21	5	0	10	0
03	1	2020-03-21	3	0	4	0
03	2	2020-03-21	2	0	6	0
04	0	2020-03-21	4	1	3	0
04	1	2020-03-21	3	1	1	0
04	2	2020-03-21	1	0	2	0
05	0	2020-03-21	13	1	10	0
05	1	2020-03-21	5	0	8	0
05	2	2020-03-21	8	1	2	0
06	0	2020-03-21	46	7	61	6
06	1	2020-03-21	26	6	25	2
06	2	2020-03-21	18	0	35	4
07	0	2020-03-21	15	3	3	1
07	1	2020-03-21	9	2	0	1
07	2	2020-03-21	3	0	3	0
08	0	2020-03-21	3	1	1	0
08	1	2020-03-21	2	0	1	0
08	2	2020-03-21	1	1	0	0
09	0	2020-03-21	2	1	3	0
09	1	2020-03-21	1	0	2	0
09	2	2020-03-21	1	1	1	0
10	0	2020-03-21	12	2	0	0
10	1	2020-03-21	9	1	0	0
10	2	2020-03-21	3	1	0	0
11	0	2020-03-21	26	9	13	9
11	1	2020-03-21	20	7	3	6
11	2	2020-03-21	6	2	10	3
12	0	2020-03-21	11	2	4	1
12	1	2020-03-21	3	1	2	1
12	2	2020-03-21	8	1	2	0
13	0	2020-03-21	203	33	128	4
13	1	2020-03-21	92	21	69	2
13	2	2020-03-21	103	12	58	2
14	0	2020-03-21	6	3	3	1
14	1	2020-03-21	5	2	2	1
14	2	2020-03-21	1	1	1	0
15	0	2020-03-21	5	1	0	0
15	1	2020-03-21	3	1	0	0
15	2	2020-03-21	2	0	0	0
16	0	2020-03-21	3	1	2	0
16	1	2020-03-21	2	1	1	0
16	2	2020-03-21	1	0	1	0
17	0	2020-03-21	11	4	2	0
17	1	2020-03-21	9	4	2	0
17	2	2020-03-21	2	0	0	0
18	0	2020-03-21	0	0	0	0
18	1	2020-03-21	0	0	0	0
18	2	2020-03-21	0	0	0	0
19	0	2020-03-21	1	0	0	0
19	1	2020-03-21	1	0	0	0
19	2	2020-03-21	0	0	0	0
21	0	2020-03-21	79	30	45	3
21	1	2020-03-21	41	20	14	1
21	2	2020-03-21	38	10	30	2
22	0	2020-03-21	7	1	3	1
22	1	2020-03-21	2	0	1	1
22	2	2020-03-21	4	0	2	0
23	0	2020-03-21	1	0	0	0
23	1	2020-03-21	1	0	0	0
23	2	2020-03-21	0	0	0	0
24	0	2020-03-21	4	3	2	0
24	1	2020-03-21	3	3	1	0
24	2	2020-03-21	1	0	1	0
25	0	2020-03-21	48	21	19	6
25	1	2020-03-21	34	19	8	4
25	2	2020-03-21	14	2	11	2
26	0	2020-03-21	43	9	2	2
26	1	2020-03-21	24	6	1	1
26	2	2020-03-21	19	3	1	1
27	0	2020-03-21	7	3	0	0
27	1	2020-03-21	5	1	0	0
27	2	2020-03-21	2	2	0	0
28	0	2020-03-21	13	2	1	1
28	1	2020-03-21	6	1	0	1
28	2	2020-03-21	7	1	1	0
29	0	2020-03-21	20	2	6	1
29	1	2020-03-21	9	2	3	1
29	2	2020-03-21	11	0	3	0
2A	0	2020-03-21	62	14	12	4
2A	1	2020-03-21	36	10	7	1
2A	2	2020-03-21	26	4	5	3
2B	0	2020-03-21	6	0	23	0
2B	1	2020-03-21	3	0	11	0
2B	2	2020-03-21	3	0	12	0
30	0	2020-03-21	7	1	11	1
30	1	2020-03-21	6	1	6	1
30	2	2020-03-21	1	0	5	0
31	0	2020-03-21	51	14	17	2
31	1	2020-03-21	41	13	8	1
31	2	2020-03-21	10	1	9	1
32	0	2020-03-21	4	3	0	0
32	1	2020-03-21	4	3	0	0
32	2	2020-03-21	0	0	0	0
33	0	2020-03-21	39	15	12	2
33	1	2020-03-21	24	11	7	1
33	2	2020-03-21	15	4	5	1
34	0	2020-03-21	65	22	33	4
34	1	2020-03-21	35	12	16	1
34	2	2020-03-21	30	10	17	3
35	0	2020-03-21	20	10	18	1
35	1	2020-03-21	16	8	8	1
35	2	2020-03-21	4	2	10	0
36	0	2020-03-21	5	2	0	0
36	1	2020-03-21	4	2	0	0
36	2	2020-03-21	1	0	0	0
37	0	2020-03-21	12	4	1	1
37	1	2020-03-21	8	4	0	1
37	2	2020-03-21	4	0	1	0
38	0	2020-03-21	30	2	13	1
38	1	2020-03-21	15	1	7	1
38	2	2020-03-21	15	1	6	0
39	0	2020-03-21	7	1	2	0
39	1	2020-03-21	4	0	2	0
39	2	2020-03-21	3	1	0	0
40	0	2020-03-21	0	0	0	0
40	1	2020-03-21	0	0	0	0
40	2	2020-03-21	0	0	0	0
41	0	2020-03-21	4	0	0	0
41	1	2020-03-21	1	0	0	0
41	2	2020-03-21	3	0	0	0
42	0	2020-03-21	71	18	12	6
42	1	2020-03-21	50	16	7	4
42	2	2020-03-21	21	2	5	2
43	0	2020-03-21	4	2	6	0
43	1	2020-03-21	2	2	2	0
43	2	2020-03-21	2	0	4	0
44	0	2020-03-21	38	11	12	1
44	1	2020-03-21	23	8	7	0
44	2	2020-03-21	15	3	5	1
45	0	2020-03-21	30	6	3	0
45	1	2020-03-21	14	5	2	0
45	2	2020-03-21	16	1	1	0
46	0	2020-03-21	1	0	5	0
46	1	2020-03-21	1	0	3	0
46	2	2020-03-21	0	0	2	0
47	0	2020-03-21	13	1	1	0
47	1	2020-03-21	8	1	1	0
47	2	2020-03-21	5	0	0	0
48	0	2020-03-21	1	0	0	0
48	1	2020-03-21	0	0	0	0
48	2	2020-03-21	1	0	0	0
49	0	2020-03-21	22	6	35	2
49	1	2020-03-21	12	4	20	2
49	2	2020-03-21	9	1	15	0
50	0	2020-03-21	15	4	2	0
50	1	2020-03-21	7	1	1	0
50	2	2020-03-21	8	3	1	0
51	0	2020-03-21	67	16	27	2
51	1	2020-03-21	40	9	11	1
51	2	2020-03-21	27	7	16	1
52	0	2020-03-21	9	0	5	4
52	1	2020-03-21	3	0	1	2
52	2	2020-03-21	6	0	4	2
53	0	2020-03-21	7	2	3	0
53	1	2020-03-21	6	2	1	0
53	2	2020-03-21	1	0	2	0
54	0	2020-03-21	76	35	2	9
54	1	2020-03-21	46	24	0	5
54	2	2020-03-21	28	10	2	4
55	0	2020-03-21	60	6	7	1
55	1	2020-03-21	29	3	3	0
55	2	2020-03-21	31	3	4	1
56	0	2020-03-21	62	11	28	12
56	1	2020-03-21	34	8	12	7
56	2	2020-03-21	28	3	16	5
57	0	2020-03-21	286	64	34	25
57	1	2020-03-21	153	48	17	8
57	2	2020-03-21	130	16	16	17
58	0	2020-03-21	1	1	0	0
58	1	2020-03-21	1	1	0	0
58	2	2020-03-21	0	0	0	0
59	0	2020-03-21	79	43	17	5
59	1	2020-03-21	53	33	9	1
59	2	2020-03-21	26	10	8	4
60	0	2020-03-21	138	28	43	18
60	1	2020-03-21	74	19	24	12
60	2	2020-03-21	64	9	19	6
61	0	2020-03-21	4	1	3	0
61	1	2020-03-21	2	1	1	0
61	2	2020-03-21	2	0	2	0
62	0	2020-03-21	44	18	27	1
62	1	2020-03-21	31	16	17	0
62	2	2020-03-21	13	2	10	1
63	0	2020-03-21	4	1	10	0
63	1	2020-03-21	3	1	6	0
63	2	2020-03-21	1	0	4	0
64	0	2020-03-21	10	1	2	1
64	1	2020-03-21	6	1	0	1
64	2	2020-03-21	4	0	2	0
65	0	2020-03-21	5	1	0	0
65	1	2020-03-21	4	1	0	0
65	2	2020-03-21	1	0	0	0
66	0	2020-03-21	25	15	3	5
66	1	2020-03-21	13	10	2	1
66	2	2020-03-21	12	5	1	4
67	0	2020-03-21	420	108	51	31
67	1	2020-03-21	233	79	23	17
67	2	2020-03-21	177	28	28	14
68	0	2020-03-21	517	94	196	121
68	1	2020-03-21	287	67	105	66
68	2	2020-03-21	222	27	90	55
69	0	2020-03-21	272	41	71	21
69	1	2020-03-21	89	15	13	8
69	2	2020-03-21	63	6	25	6
70	0	2020-03-21	26	6	5	0
70	1	2020-03-21	14	2	1	0
70	2	2020-03-21	12	4	4	0
71	0	2020-03-21	50	6	14	10
71	1	2020-03-21	20	4	6	6
71	2	2020-03-21	30	2	8	4
72	0	2020-03-21	9	0	5	0
72	1	2020-03-21	3	0	2	0
72	2	2020-03-21	6	0	3	0
73	0	2020-03-21	18	2	8	0
73	1	2020-03-21	9	2	3	0
73	2	2020-03-21	9	0	5	0
74	0	2020-03-21	54	9	56	7
74	1	2020-03-21	24	6	34	3
74	2	2020-03-21	16	0	20	4
75	0	2020-03-21	649	165	122	36
75	1	2020-03-21	386	118	66	27
75	2	2020-03-21	253	47	55	9
76	0	2020-03-21	60	10	6	5
76	1	2020-03-21	39	7	4	5
76	2	2020-03-21	21	3	2	0
77	0	2020-03-21	89	36	21	3
77	1	2020-03-21	59	29	11	2
77	2	2020-03-21	30	7	10	1
78	0	2020-03-21	174	39	30	14
78	1	2020-03-21	93	25	14	7
78	2	2020-03-21	79	14	16	6
79	0	2020-03-21	5	1	8	0
79	1	2020-03-21	2	1	3	0
79	2	2020-03-21	3	0	5	0
80	0	2020-03-21	102	35	21	7
80	1	2020-03-21	55	21	10	3
80	2	2020-03-21	45	14	11	4
81	0	2020-03-21	8	1	3	1
81	1	2020-03-21	1	0	3	1
81	2	2020-03-21	7	1	0	0
82	0	2020-03-21	3	1	0	1
82	1	2020-03-21	2	1	0	1
82	2	2020-03-21	1	0	0	0
83	0	2020-03-21	40	19	98	2
83	1	2020-03-21	25	14	44	1
83	2	2020-03-21	15	5	54	1
84	0	2020-03-21	20	5	10	1
84	1	2020-03-21	8	2	7	0
84	2	2020-03-21	12	3	3	1
85	0	2020-03-21	4	2	7	0
85	1	2020-03-21	3	1	2	0
85	2	2020-03-21	1	1	5	0
86	0	2020-03-21	12	0	1	1
86	1	2020-03-21	3	0	0	0
86	2	2020-03-21	9	0	1	1
87	0	2020-03-21	8	2	2	1
87	1	2020-03-21	4	1	0	0
87	2	2020-03-21	4	1	2	1
88	0	2020-03-21	55	6	8	16
88	1	2020-03-21	29	5	3	10
88	2	2020-03-21	25	1	5	6
89	0	2020-03-21	11	3	1	2
89	1	2020-03-21	7	2	1	1
89	2	2020-03-21	4	1	0	1
90	0	2020-03-21	61	11	2	6
90	1	2020-03-21	34	9	1	2
90	2	2020-03-21	27	2	1	4
91	0	2020-03-21	151	35	8	5
91	1	2020-03-21	90	23	5	4
91	2	2020-03-21	60	12	3	1
92	0	2020-03-21	298	81	71	17
92	1	2020-03-21	172	63	33	12
92	2	2020-03-21	122	18	37	5
93	0	2020-03-21	220	66	37	20
93	1	2020-03-21	129	37	20	10
93	2	2020-03-21	87	25	17	9
94	0	2020-03-21	268	67	79	13
94	1	2020-03-21	155	49	41	9
94	2	2020-03-21	109	17	38	4
95	0	2020-03-21	238	56	70	14
95	1	2020-03-21	149	43	38	11
95	2	2020-03-21	88	13	32	3
971	0	2020-03-21	0	0	0	0
971	1	2020-03-21	0	0	0	0
971	2	2020-03-21	0	0	0	0
972	0	2020-03-21	19	5	0	1
972	1	2020-03-21	10	3	0	0
972	2	2020-03-21	9	2	0	1
973	0	2020-03-21	0	0	0	0
973	1	2020-03-21	0	0	0	0
973	2	2020-03-21	0	0	0	0
974	0	2020-03-21	2	2	0	0
974	1	2020-03-21	2	2	0	0
974	2	2020-03-21	0	0	0	0
976	0	2020-03-21	0	0	0	0
976	1	2020-03-21	0	0	0	0
976	2	2020-03-21	0	0	0	0
01	0	2020-03-22	8	1	2	0
01	1	2020-03-22	4	1	1	0
01	2	2020-03-22	4	0	1	0
02	0	2020-03-22	69	21	55	28
02	1	2020-03-22	35	9	23	20
02	2	2020-03-22	34	12	32	8
03	0	2020-03-22	5	0	10	0
03	1	2020-03-22	3	0	4	0
03	2	2020-03-22	2	0	6	0
04	0	2020-03-22	4	1	3	0
04	1	2020-03-22	3	1	1	0
04	2	2020-03-22	1	0	2	0
05	0	2020-03-22	14	1	11	0
05	1	2020-03-22	5	0	8	0
05	2	2020-03-22	9	1	3	0
06	0	2020-03-22	45	8	63	7
06	1	2020-03-22	26	7	26	3
06	2	2020-03-22	17	0	36	4
07	0	2020-03-22	22	3	3	1
07	1	2020-03-22	11	2	0	1
07	2	2020-03-22	6	0	3	0
08	0	2020-03-22	4	1	1	0
08	1	2020-03-22	3	0	1	0
08	2	2020-03-22	1	1	0	0
09	0	2020-03-22	2	1	3	0
09	1	2020-03-22	1	0	2	0
09	2	2020-03-22	1	1	1	0
10	0	2020-03-22	21	4	0	0
10	1	2020-03-22	14	3	0	0
10	2	2020-03-22	7	1	0	0
11	0	2020-03-22	27	9	13	9
11	1	2020-03-22	22	7	3	6
11	2	2020-03-22	5	2	10	3
12	0	2020-03-22	13	2	4	1
12	1	2020-03-22	4	1	2	1
12	2	2020-03-22	9	1	2	0
13	0	2020-03-22	247	41	133	4
13	1	2020-03-22	107	25	72	2
13	2	2020-03-22	112	16	60	2
14	0	2020-03-22	11	4	3	1
14	1	2020-03-22	7	3	2	1
14	2	2020-03-22	4	1	1	0
15	0	2020-03-22	5	1	0	0
15	1	2020-03-22	3	1	0	0
15	2	2020-03-22	2	0	0	0
16	0	2020-03-22	5	3	2	1
16	1	2020-03-22	2	1	1	1
16	2	2020-03-22	2	1	1	0
17	0	2020-03-22	12	4	5	0
17	1	2020-03-22	9	4	4	0
17	2	2020-03-22	3	0	1	0
18	0	2020-03-22	0	0	0	0
18	1	2020-03-22	0	0	0	0
18	2	2020-03-22	0	0	0	0
19	0	2020-03-22	4	0	0	1
19	1	2020-03-22	4	0	0	1
19	2	2020-03-22	0	0	0	0
21	0	2020-03-22	101	31	73	4
21	1	2020-03-22	49	21	25	2
21	2	2020-03-22	51	10	46	2
22	0	2020-03-22	7	1	3	1
22	1	2020-03-22	2	0	1	1
22	2	2020-03-22	4	0	2	0
23	0	2020-03-22	1	0	0	0
23	1	2020-03-22	1	0	0	0
23	2	2020-03-22	0	0	0	0
24	0	2020-03-22	6	3	2	0
24	1	2020-03-22	3	3	1	0
24	2	2020-03-22	3	0	1	0
25	0	2020-03-22	63	21	20	8
25	1	2020-03-22	37	18	9	6
25	2	2020-03-22	26	3	11	2
26	0	2020-03-22	46	11	3	4
26	1	2020-03-22	25	7	1	2
26	2	2020-03-22	21	4	2	2
27	0	2020-03-22	12	4	0	0
27	1	2020-03-22	7	1	0	0
27	2	2020-03-22	5	3	0	0
28	0	2020-03-22	15	2	2	1
28	1	2020-03-22	8	1	0	1
28	2	2020-03-22	7	1	2	0
29	0	2020-03-22	19	2	9	2
29	1	2020-03-22	9	2	3	2
29	2	2020-03-22	8	0	6	0
2A	0	2020-03-22	58	13	13	6
2A	1	2020-03-22	35	10	7	2
2A	2	2020-03-22	23	3	6	4
2B	0	2020-03-22	6	0	23	0
2B	1	2020-03-22	3	0	11	0
2B	2	2020-03-22	3	0	12	0
30	0	2020-03-22	13	1	10	2
30	1	2020-03-22	9	1	5	2
30	2	2020-03-22	4	0	5	0
31	0	2020-03-22	55	16	23	2
31	1	2020-03-22	45	15	11	1
31	2	2020-03-22	10	1	12	1
32	0	2020-03-22	4	3	0	0
32	1	2020-03-22	4	3	0	0
32	2	2020-03-22	0	0	0	0
33	0	2020-03-22	54	23	13	2
33	1	2020-03-22	35	15	7	1
33	2	2020-03-22	19	8	6	1
34	0	2020-03-22	66	22	38	4
34	1	2020-03-22	33	12	19	1
34	2	2020-03-22	33	10	19	3
35	0	2020-03-22	27	13	18	1
35	1	2020-03-22	21	11	8	1
35	2	2020-03-22	6	2	10	0
36	0	2020-03-22	5	2	0	0
36	1	2020-03-22	4	2	0	0
36	2	2020-03-22	1	0	0	0
37	0	2020-03-22	13	5	1	1
37	1	2020-03-22	8	4	0	1
37	2	2020-03-22	5	1	1	0
38	0	2020-03-22	36	2	14	1
38	1	2020-03-22	17	1	8	1
38	2	2020-03-22	19	1	6	0
39	0	2020-03-22	8	1	2	0
39	1	2020-03-22	4	0	2	0
39	2	2020-03-22	4	1	0	0
40	0	2020-03-22	0	0	0	0
40	1	2020-03-22	0	0	0	0
40	2	2020-03-22	0	0	0	0
41	0	2020-03-22	4	0	0	0
41	1	2020-03-22	1	0	0	0
41	2	2020-03-22	3	0	0	0
42	0	2020-03-22	98	23	16	8
42	1	2020-03-22	68	20	9	5
42	2	2020-03-22	30	3	7	3
43	0	2020-03-22	5	2	7	0
43	1	2020-03-22	3	2	2	0
43	2	2020-03-22	2	0	5	0
44	0	2020-03-22	50	12	14	2
44	1	2020-03-22	32	9	8	1
44	2	2020-03-22	18	3	6	1
45	0	2020-03-22	37	12	7	1
45	1	2020-03-22	19	9	3	0
45	2	2020-03-22	18	3	4	1
46	0	2020-03-22	1	0	5	0
46	1	2020-03-22	1	0	3	0
46	2	2020-03-22	0	0	2	0
47	0	2020-03-22	15	2	1	0
47	1	2020-03-22	9	2	1	0
47	2	2020-03-22	6	0	0	0
48	0	2020-03-22	2	0	1	0
48	1	2020-03-22	2	0	0	0
48	2	2020-03-22	0	0	1	0
49	0	2020-03-22	22	6	40	2
49	1	2020-03-22	12	3	24	2
49	2	2020-03-22	10	3	16	0
50	0	2020-03-22	19	5	3	0
50	1	2020-03-22	9	2	1	0
50	2	2020-03-22	10	3	2	0
51	0	2020-03-22	92	19	27	3
51	1	2020-03-22	56	13	11	2
51	2	2020-03-22	36	6	16	1
52	0	2020-03-22	13	2	5	4
52	1	2020-03-22	4	1	1	2
52	2	2020-03-22	9	1	4	2
53	0	2020-03-22	9	2	3	0
53	1	2020-03-22	7	2	1	0
53	2	2020-03-22	2	0	2	0
54	0	2020-03-22	105	57	12	16
54	1	2020-03-22	62	39	5	8
54	2	2020-03-22	42	18	6	7
55	0	2020-03-22	60	6	7	1
55	1	2020-03-22	29	3	3	0
55	2	2020-03-22	31	3	4	1
56	0	2020-03-22	77	15	29	13
56	1	2020-03-22	47	12	12	8
56	2	2020-03-22	30	3	17	5
57	0	2020-03-22	332	72	51	32
57	1	2020-03-22	179	57	26	11
57	2	2020-03-22	151	15	24	21
58	0	2020-03-22	1	1	0	0
58	1	2020-03-22	1	1	0	0
58	2	2020-03-22	0	0	0	0
59	0	2020-03-22	96	43	20	11
59	1	2020-03-22	58	33	12	6
59	2	2020-03-22	38	10	8	5
60	0	2020-03-22	147	28	47	19
60	1	2020-03-22	81	19	25	13
60	2	2020-03-22	66	9	22	6
61	0	2020-03-22	4	1	3	0
61	1	2020-03-22	2	1	1	0
61	2	2020-03-22	2	0	2	0
62	0	2020-03-22	49	20	30	1
62	1	2020-03-22	35	18	18	0
62	2	2020-03-22	14	2	12	1
63	0	2020-03-22	4	2	11	0
63	1	2020-03-22	2	2	7	0
63	2	2020-03-22	2	0	4	0
64	0	2020-03-22	15	1	2	1
64	1	2020-03-22	8	1	0	1
64	2	2020-03-22	7	0	2	0
65	0	2020-03-22	6	1	1	0
65	1	2020-03-22	3	1	1	0
65	2	2020-03-22	1	0	0	0
66	0	2020-03-22	60	20	4	5
66	1	2020-03-22	27	14	2	1
66	2	2020-03-22	33	6	2	4
67	0	2020-03-22	463	110	51	38
67	1	2020-03-22	254	83	23	19
67	2	2020-03-22	184	26	28	18
68	0	2020-03-22	538	90	221	136
68	1	2020-03-22	297	67	118	74
68	2	2020-03-22	233	23	102	61
69	0	2020-03-22	326	48	80	26
69	1	2020-03-22	126	19	18	10
69	2	2020-03-22	95	9	29	9
70	0	2020-03-22	26	6	5	0
70	1	2020-03-22	14	2	1	0
70	2	2020-03-22	12	4	4	0
71	0	2020-03-22	65	6	36	12
71	1	2020-03-22	27	4	14	7
71	2	2020-03-22	38	2	22	5
72	0	2020-03-22	11	0	6	0
72	1	2020-03-22	3	0	2	0
72	2	2020-03-22	8	0	4	0
73	0	2020-03-22	22	2	8	0
73	1	2020-03-22	10	2	3	0
73	2	2020-03-22	12	0	5	0
74	0	2020-03-22	64	11	58	7
74	1	2020-03-22	28	6	35	3
74	2	2020-03-22	17	0	20	4
75	0	2020-03-22	728	195	145	40
75	1	2020-03-22	447	142	78	30
75	2	2020-03-22	274	53	65	10
76	0	2020-03-22	72	11	6	7
76	1	2020-03-22	44	8	4	6
76	2	2020-03-22	27	3	2	1
77	0	2020-03-22	127	41	23	3
77	1	2020-03-22	88	32	11	2
77	2	2020-03-22	39	9	12	1
78	0	2020-03-22	206	43	34	14
78	1	2020-03-22	115	29	17	7
78	2	2020-03-22	88	14	17	6
79	0	2020-03-22	8	1	11	1
79	1	2020-03-22	4	1	6	0
79	2	2020-03-22	4	0	5	1
80	0	2020-03-22	124	39	21	8
80	1	2020-03-22	69	24	10	3
80	2	2020-03-22	52	15	11	5
81	0	2020-03-22	10	2	4	1
81	1	2020-03-22	2	0	3	1
81	2	2020-03-22	8	2	1	0
82	0	2020-03-22	3	1	0	1
82	1	2020-03-22	2	1	0	1
82	2	2020-03-22	1	0	0	0
83	0	2020-03-22	56	22	106	2
83	1	2020-03-22	36	16	48	1
83	2	2020-03-22	20	6	58	1
84	0	2020-03-22	22	5	11	1
84	1	2020-03-22	9	2	7	0
84	2	2020-03-22	13	3	4	1
85	0	2020-03-22	7	5	8	0
85	1	2020-03-22	6	4	3	0
85	2	2020-03-22	1	1	5	0
86	0	2020-03-22	13	1	1	1
86	1	2020-03-22	3	0	0	0
86	2	2020-03-22	10	1	1	1
87	0	2020-03-22	13	2	2	1
87	1	2020-03-22	8	1	0	0
87	2	2020-03-22	5	1	2	1
88	0	2020-03-22	62	9	16	22
88	1	2020-03-22	31	6	7	13
88	2	2020-03-22	29	1	9	8
89	0	2020-03-22	13	3	1	2
89	1	2020-03-22	8	2	1	1
89	2	2020-03-22	5	1	0	1
90	0	2020-03-22	68	14	28	14
90	1	2020-03-22	39	11	16	4
90	2	2020-03-22	29	3	12	10
91	0	2020-03-22	196	47	12	4
91	1	2020-03-22	119	31	7	3
91	2	2020-03-22	76	16	5	1
92	0	2020-03-22	378	95	87	21
92	1	2020-03-22	223	73	40	16
92	2	2020-03-22	151	22	46	5
93	0	2020-03-22	263	75	41	23
93	1	2020-03-22	154	42	21	12
93	2	2020-03-22	105	29	20	10
94	0	2020-03-22	306	78	90	17
94	1	2020-03-22	172	52	47	11
94	2	2020-03-22	129	25	43	6
95	0	2020-03-22	281	66	81	18
95	1	2020-03-22	172	50	47	12
95	2	2020-03-22	108	16	34	6
971	0	2020-03-22	6	6	0	0
971	1	2020-03-22	5	5	0	0
971	2	2020-03-22	1	1	0	0
972	0	2020-03-22	19	5	0	1
972	1	2020-03-22	10	3	0	0
972	2	2020-03-22	9	2	0	1
973	0	2020-03-22	0	0	0	0
973	1	2020-03-22	0	0	0	0
973	2	2020-03-22	0	0	0	0
974	0	2020-03-22	2	2	0	0
974	1	2020-03-22	2	2	0	0
974	2	2020-03-22	0	0	0	0
976	0	2020-03-22	0	0	0	0
976	1	2020-03-22	0	0	0	0
976	2	2020-03-22	0	0	0	0
01	0	2020-03-23	17	3	7	0
01	1	2020-03-23	12	3	5	0
01	2	2020-03-23	5	0	2	0
02	0	2020-03-23	91	23	62	30
02	1	2020-03-23	48	12	26	21
02	2	2020-03-23	42	11	36	9
03	0	2020-03-23	9	0	16	1
03	1	2020-03-23	2	0	6	0
03	2	2020-03-23	7	0	10	1
04	0	2020-03-23	4	1	3	0
04	1	2020-03-23	3	1	1	0
04	2	2020-03-23	1	0	2	0
05	0	2020-03-23	19	3	13	0
05	1	2020-03-23	5	1	9	0
05	2	2020-03-23	14	2	4	0
06	0	2020-03-23	66	13	63	8
06	1	2020-03-23	40	12	26	3
06	2	2020-03-23	24	0	36	5
07	0	2020-03-23	29	3	3	2
07	1	2020-03-23	12	2	0	2
07	2	2020-03-23	11	0	3	0
08	0	2020-03-23	6	3	1	0
08	1	2020-03-23	3	0	1	0
08	2	2020-03-23	3	3	0	0
09	0	2020-03-23	3	3	3	0
09	1	2020-03-23	2	2	2	0
09	2	2020-03-23	1	1	1	0
10	0	2020-03-23	33	4	0	2
10	1	2020-03-23	23	3	0	2
10	2	2020-03-23	10	1	0	0
11	0	2020-03-23	36	13	13	10
11	1	2020-03-23	29	11	3	7
11	2	2020-03-23	7	2	10	3
12	0	2020-03-23	14	2	4	1
12	1	2020-03-23	5	1	2	1
12	2	2020-03-23	9	1	2	0
13	0	2020-03-23	311	64	168	4
13	1	2020-03-23	141	42	93	2
13	2	2020-03-23	143	22	73	2
14	0	2020-03-23	26	6	5	1
14	1	2020-03-23	15	5	3	1
14	2	2020-03-23	11	1	2	0
15	0	2020-03-23	5	2	0	0
15	1	2020-03-23	3	1	0	0
15	2	2020-03-23	2	1	0	0
16	0	2020-03-23	6	4	2	1
16	1	2020-03-23	3	2	1	1
16	2	2020-03-23	2	1	1	0
17	0	2020-03-23	13	6	6	0
17	1	2020-03-23	9	6	5	0
17	2	2020-03-23	4	0	1	0
18	0	2020-03-23	0	0	0	0
18	1	2020-03-23	0	0	0	0
18	2	2020-03-23	0	0	0	0
19	0	2020-03-23	6	1	0	2
19	1	2020-03-23	3	0	0	2
19	2	2020-03-23	0	0	0	0
21	0	2020-03-23	113	34	84	13
21	1	2020-03-23	56	24	29	7
21	2	2020-03-23	57	10	53	6
22	0	2020-03-23	9	1	3	1
22	1	2020-03-23	2	0	1	1
22	2	2020-03-23	6	0	2	0
23	0	2020-03-23	2	0	0	0
23	1	2020-03-23	2	0	0	0
23	2	2020-03-23	0	0	0	0
24	0	2020-03-23	20	3	11	0
24	1	2020-03-23	7	3	5	0
24	2	2020-03-23	13	0	6	0
25	0	2020-03-23	65	22	25	10
25	1	2020-03-23	39	18	11	7
25	2	2020-03-23	26	4	14	3
26	0	2020-03-23	58	16	5	7
26	1	2020-03-23	35	12	2	3
26	2	2020-03-23	23	4	3	4
27	0	2020-03-23	15	4	0	0
27	1	2020-03-23	8	1	0	0
27	2	2020-03-23	7	3	0	0
28	0	2020-03-23	34	10	2	2
28	1	2020-03-23	17	5	0	2
28	2	2020-03-23	14	4	2	0
29	0	2020-03-23	22	1	9	4
29	1	2020-03-23	11	1	3	3
29	2	2020-03-23	9	0	6	1
2A	0	2020-03-23	59	9	14	7
2A	1	2020-03-23	30	5	7	3
2A	2	2020-03-23	29	4	7	4
2B	0	2020-03-23	6	0	31	0
2B	1	2020-03-23	3	0	15	0
2B	2	2020-03-23	3	0	16	0
30	0	2020-03-23	15	5	11	2
30	1	2020-03-23	10	4	6	2
30	2	2020-03-23	5	1	5	0
31	0	2020-03-23	71	19	26	2
31	1	2020-03-23	53	16	11	1
31	2	2020-03-23	18	3	15	1
32	0	2020-03-23	5	3	0	0
32	1	2020-03-23	4	3	0	0
32	2	2020-03-23	1	0	0	0
33	0	2020-03-23	68	24	19	3
33	1	2020-03-23	46	17	9	1
33	2	2020-03-23	22	7	10	2
34	0	2020-03-23	82	29	42	9
34	1	2020-03-23	42	17	23	2
34	2	2020-03-23	39	12	19	7
35	0	2020-03-23	34	14	20	1
35	1	2020-03-23	24	12	10	1
35	2	2020-03-23	10	2	10	0
36	0	2020-03-23	16	5	0	2
36	1	2020-03-23	7	3	0	1
36	2	2020-03-23	9	2	0	1
37	0	2020-03-23	18	6	1	2
37	1	2020-03-23	11	5	0	2
37	2	2020-03-23	7	1	1	0
38	0	2020-03-23	51	7	19	3
38	1	2020-03-23	27	5	12	2
38	2	2020-03-23	24	2	7	1
39	0	2020-03-23	10	1	2	0
39	1	2020-03-23	4	0	2	0
39	2	2020-03-23	6	1	0	0
40	0	2020-03-23	4	0	0	0
40	1	2020-03-23	2	0	0	0
40	2	2020-03-23	2	0	0	0
41	0	2020-03-23	6	1	1	0
41	1	2020-03-23	3	1	1	0
41	2	2020-03-23	3	0	0	0
42	0	2020-03-23	123	25	20	10
42	1	2020-03-23	86	21	12	6
42	2	2020-03-23	37	4	8	4
43	0	2020-03-23	7	3	7	0
43	1	2020-03-23	4	3	2	0
43	2	2020-03-23	3	0	5	0
44	0	2020-03-23	57	15	14	3
44	1	2020-03-23	33	9	8	2
44	2	2020-03-23	24	6	6	1
45	0	2020-03-23	43	16	11	2
45	1	2020-03-23	21	13	6	1
45	2	2020-03-23	22	3	5	1
46	0	2020-03-23	2	0	4	0
46	1	2020-03-23	2	0	2	0
46	2	2020-03-23	0	0	2	0
47	0	2020-03-23	18	4	1	1
47	1	2020-03-23	10	2	1	0
47	2	2020-03-23	8	2	0	1
48	0	2020-03-23	4	0	1	0
48	1	2020-03-23	4	0	0	0
48	2	2020-03-23	0	0	1	0
49	0	2020-03-23	46	10	43	4
49	1	2020-03-23	22	4	24	4
49	2	2020-03-23	24	6	19	0
50	0	2020-03-23	20	7	4	0
50	1	2020-03-23	9	4	2	0
50	2	2020-03-23	11	3	2	0
51	0	2020-03-23	117	28	39	8
51	1	2020-03-23	72	22	16	6
51	2	2020-03-23	45	6	23	2
52	0	2020-03-23	13	3	6	4
52	1	2020-03-23	5	2	1	2
52	2	2020-03-23	8	1	5	2
53	0	2020-03-23	14	2	3	1
53	1	2020-03-23	10	2	1	1
53	2	2020-03-23	4	0	2	0
54	0	2020-03-23	121	55	16	19
54	1	2020-03-23	69	35	7	11
54	2	2020-03-23	51	20	8	8
55	0	2020-03-23	86	7	16	2
55	1	2020-03-23	39	3	6	1
55	2	2020-03-23	46	4	10	1
56	0	2020-03-23	67	14	36	17
56	1	2020-03-23	42	11	16	10
56	2	2020-03-23	25	3	20	7
57	0	2020-03-23	391	83	58	53
57	1	2020-03-23	202	61	29	25
57	2	2020-03-23	184	22	28	28
58	0	2020-03-23	3	2	0	0
58	1	2020-03-23	2	2	0	0
58	2	2020-03-23	1	0	0	0
59	0	2020-03-23	145	68	30	15
59	1	2020-03-23	90	51	19	8
59	2	2020-03-23	55	17	11	7
60	0	2020-03-23	174	31	54	29
60	1	2020-03-23	93	20	29	20
60	2	2020-03-23	80	11	25	9
61	0	2020-03-23	6	2	7	0
61	1	2020-03-23	4	2	3	0
61	2	2020-03-23	2	0	4	0
62	0	2020-03-23	65	28	33	3
62	1	2020-03-23	44	23	19	1
62	2	2020-03-23	21	5	14	2
63	0	2020-03-23	7	3	11	0
63	1	2020-03-23	4	2	7	0
63	2	2020-03-23	3	1	4	0
64	0	2020-03-23	19	1	5	1
64	1	2020-03-23	9	1	2	1
64	2	2020-03-23	10	0	3	0
65	0	2020-03-23	7	1	2	0
65	1	2020-03-23	5	1	1	0
65	2	2020-03-23	2	0	1	0
66	0	2020-03-23	83	22	6	6
66	1	2020-03-23	38	16	4	2
66	2	2020-03-23	45	6	2	4
67	0	2020-03-23	545	139	77	50
67	1	2020-03-23	308	104	35	29
67	2	2020-03-23	211	34	42	19
68	0	2020-03-23	634	100	233	157
68	1	2020-03-23	363	78	120	88
68	2	2020-03-23	257	20	112	68
69	0	2020-03-23	429	71	90	34
69	1	2020-03-23	171	35	24	13
69	2	2020-03-23	163	17	33	14
70	0	2020-03-23	26	6	5	0
70	1	2020-03-23	14	2	1	0
70	2	2020-03-23	12	4	4	0
71	0	2020-03-23	84	7	50	13
71	1	2020-03-23	41	5	20	7
71	2	2020-03-23	43	2	30	6
72	0	2020-03-23	20	2	6	1
72	1	2020-03-23	10	2	2	0
72	2	2020-03-23	10	0	4	1
73	0	2020-03-23	26	4	13	1
73	1	2020-03-23	14	4	5	1
73	2	2020-03-23	12	0	8	0
74	0	2020-03-23	92	20	63	12
74	1	2020-03-23	38	8	36	6
74	2	2020-03-23	25	2	22	5
75	0	2020-03-23	925	223	198	59
75	1	2020-03-23	565	158	109	42
75	2	2020-03-23	348	65	86	17
76	0	2020-03-23	81	14	8	8
76	1	2020-03-23	48	9	5	7
76	2	2020-03-23	32	5	3	1
77	0	2020-03-23	161	54	40	3
77	1	2020-03-23	111	40	20	2
77	2	2020-03-23	49	13	20	1
78	0	2020-03-23	226	49	41	17
78	1	2020-03-23	129	35	24	9
78	2	2020-03-23	94	14	17	8
79	0	2020-03-23	8	1	12	1
79	1	2020-03-23	4	1	6	0
79	2	2020-03-23	4	0	6	1
80	0	2020-03-23	137	37	22	9
80	1	2020-03-23	77	22	10	4
80	2	2020-03-23	57	15	12	5
81	0	2020-03-23	7	3	4	1
81	1	2020-03-23	1	0	3	1
81	2	2020-03-23	6	3	1	0
82	0	2020-03-23	2	1	1	1
82	1	2020-03-23	2	1	0	1
82	2	2020-03-23	0	0	1	0
83	0	2020-03-23	56	23	114	5
83	1	2020-03-23	38	18	51	2
83	2	2020-03-23	18	5	63	3
84	0	2020-03-23	25	8	16	3
84	1	2020-03-23	14	4	8	2
84	2	2020-03-23	11	4	8	1
85	0	2020-03-23	10	6	8	0
85	1	2020-03-23	6	4	3	0
85	2	2020-03-23	3	1	5	0
86	0	2020-03-23	15	1	1	3
86	1	2020-03-23	5	0	0	0
86	2	2020-03-23	10	1	1	3
87	0	2020-03-23	17	2	2	1
87	1	2020-03-23	10	1	0	0
87	2	2020-03-23	7	1	2	1
88	0	2020-03-23	65	10	24	32
88	1	2020-03-23	37	7	11	17
88	2	2020-03-23	27	2	13	14
89	0	2020-03-23	16	7	1	2
89	1	2020-03-23	9	5	1	1
89	2	2020-03-23	7	2	0	1
90	0	2020-03-23	94	20	31	24
90	1	2020-03-23	49	14	19	13
90	2	2020-03-23	45	6	12	11
91	0	2020-03-23	253	66	18	4
91	1	2020-03-23	155	46	9	3
91	2	2020-03-23	97	20	9	1
92	0	2020-03-23	496	126	112	28
92	1	2020-03-23	303	93	54	20
92	2	2020-03-23	187	33	57	8
93	0	2020-03-23	333	85	55	28
93	1	2020-03-23	194	55	31	14
93	2	2020-03-23	134	26	24	13
94	0	2020-03-23	384	103	108	24
94	1	2020-03-23	210	73	61	14
94	2	2020-03-23	169	29	47	10
95	0	2020-03-23	364	81	93	30
95	1	2020-03-23	219	65	55	20
95	2	2020-03-23	144	16	38	10
971	0	2020-03-23	6	6	0	0
971	1	2020-03-23	5	5	0	0
971	2	2020-03-23	1	1	0	0
972	0	2020-03-23	19	5	0	1
972	1	2020-03-23	10	3	0	0
972	2	2020-03-23	9	2	0	1
973	0	2020-03-23	0	0	0	0
973	1	2020-03-23	0	0	0	0
973	2	2020-03-23	0	0	0	0
974	0	2020-03-23	2	2	0	0
974	1	2020-03-23	2	2	0	0
974	2	2020-03-23	0	0	0	0
976	0	2020-03-23	0	0	0	0
976	1	2020-03-23	0	0	0	0
976	2	2020-03-23	0	0	0	0
01	0	2020-03-24	22	3	11	0
01	1	2020-03-24	17	3	6	0
01	2	2020-03-24	5	0	5	0
02	0	2020-03-24	107	27	85	33
02	1	2020-03-24	57	13	33	24
02	2	2020-03-24	50	14	52	9
03	0	2020-03-24	9	0	16	1
03	1	2020-03-24	3	0	6	0
03	2	2020-03-24	6	0	10	1
04	0	2020-03-24	4	1	3	0
04	1	2020-03-24	3	1	1	0
04	2	2020-03-24	1	0	2	0
05	0	2020-03-24	19	4	16	1
05	1	2020-03-24	9	1	8	0
05	2	2020-03-24	10	3	8	1
06	0	2020-03-24	55	12	86	8
06	1	2020-03-24	35	11	34	3
06	2	2020-03-24	19	0	50	5
07	0	2020-03-24	37	4	1	3
07	1	2020-03-24	17	2	0	3
07	2	2020-03-24	13	1	0	0
08	0	2020-03-24	5	3	2	0
08	1	2020-03-24	2	0	2	0
08	2	2020-03-24	3	3	0	0
09	0	2020-03-24	3	3	3	0
09	1	2020-03-24	2	2	2	0
09	2	2020-03-24	1	1	1	0
10	0	2020-03-24	36	4	0	2
10	1	2020-03-24	25	3	0	2
10	2	2020-03-24	11	1	0	0
11	0	2020-03-24	33	11	13	12
11	1	2020-03-24	25	10	3	9
11	2	2020-03-24	8	1	10	3
12	0	2020-03-24	19	3	5	1
12	1	2020-03-24	9	2	2	1
12	2	2020-03-24	10	1	3	0
13	0	2020-03-24	369	82	197	7
13	1	2020-03-24	179	57	103	4
13	2	2020-03-24	161	25	92	3
14	0	2020-03-24	29	10	7	1
14	1	2020-03-24	18	9	4	1
14	2	2020-03-24	11	1	3	0
15	0	2020-03-24	7	3	0	0
15	1	2020-03-24	4	1	0	0
15	2	2020-03-24	3	2	0	0
16	0	2020-03-24	13	4	2	2
16	1	2020-03-24	7	2	1	2
16	2	2020-03-24	5	1	1	0
17	0	2020-03-24	26	6	6	0
17	1	2020-03-24	17	6	5	0
17	2	2020-03-24	9	0	1	0
18	0	2020-03-24	2	2	1	0
18	1	2020-03-24	0	0	1	0
18	2	2020-03-24	2	2	0	0
19	0	2020-03-24	12	3	0	3
19	1	2020-03-24	9	2	0	3
19	2	2020-03-24	3	1	0	0
21	0	2020-03-24	114	34	106	22
21	1	2020-03-24	62	24	37	12
21	2	2020-03-24	52	10	67	10
22	0	2020-03-24	11	2	3	1
22	1	2020-03-24	3	0	1	1
22	2	2020-03-24	7	1	2	0
23	0	2020-03-24	2	0	0	0
23	1	2020-03-24	2	0	0	0
23	2	2020-03-24	0	0	0	0
24	0	2020-03-24	24	4	15	0
24	1	2020-03-24	7	4	7	0
24	2	2020-03-24	17	0	8	0
25	0	2020-03-24	80	26	30	11
25	1	2020-03-24	48	22	14	7
25	2	2020-03-24	32	4	16	4
26	0	2020-03-24	67	21	10	9
26	1	2020-03-24	41	16	4	3
26	2	2020-03-24	26	5	6	6
27	0	2020-03-24	15	4	0	0
27	1	2020-03-24	8	1	0	0
27	2	2020-03-24	7	3	0	0
28	0	2020-03-24	41	12	3	3
28	1	2020-03-24	23	6	1	2
28	2	2020-03-24	16	5	2	0
29	0	2020-03-24	22	1	14	5
29	1	2020-03-24	11	1	5	4
29	2	2020-03-24	10	0	9	1
2A	0	2020-03-24	63	9	18	7
2A	1	2020-03-24	29	5	10	3
2A	2	2020-03-24	34	4	8	4
2B	0	2020-03-24	7	0	33	0
2B	1	2020-03-24	3	0	16	0
2B	2	2020-03-24	4	0	17	0
30	0	2020-03-24	14	8	14	4
30	1	2020-03-24	11	7	8	3
30	2	2020-03-24	3	1	6	1
31	0	2020-03-24	89	28	38	3
31	1	2020-03-24	62	21	17	2
31	2	2020-03-24	27	7	21	1
32	0	2020-03-24	8	3	0	0
32	1	2020-03-24	7	3	0	0
32	2	2020-03-24	1	0	0	0
33	0	2020-03-24	99	41	27	3
33	1	2020-03-24	64	28	11	1
33	2	2020-03-24	35	13	16	2
34	0	2020-03-24	99	34	49	10
34	1	2020-03-24	51	22	24	3
34	2	2020-03-24	47	12	25	7
35	0	2020-03-24	33	13	26	2
35	1	2020-03-24	24	11	13	2
35	2	2020-03-24	9	2	13	0
36	0	2020-03-24	19	7	0	2
36	1	2020-03-24	8	4	0	1
36	2	2020-03-24	11	3	0	1
37	0	2020-03-24	22	6	4	2
37	1	2020-03-24	14	5	1	2
37	2	2020-03-24	8	1	3	0
38	0	2020-03-24	59	7	31	3
38	1	2020-03-24	33	5	16	2
38	2	2020-03-24	26	2	15	1
39	0	2020-03-24	24	2	4	0
39	1	2020-03-24	14	1	3	0
39	2	2020-03-24	10	1	1	0
40	0	2020-03-24	4	0	0	0
40	1	2020-03-24	2	0	0	0
40	2	2020-03-24	2	0	0	0
41	0	2020-03-24	10	1	6	0
41	1	2020-03-24	7	1	4	0
41	2	2020-03-24	3	0	2	0
42	0	2020-03-24	160	29	26	13
42	1	2020-03-24	113	25	13	8
42	2	2020-03-24	47	4	13	5
43	0	2020-03-24	8	3	8	0
43	1	2020-03-24	4	3	3	0
43	2	2020-03-24	4	0	5	0
44	0	2020-03-24	77	17	23	6
44	1	2020-03-24	45	11	14	4
44	2	2020-03-24	32	6	9	2
45	0	2020-03-24	43	16	10	2
45	1	2020-03-24	21	13	6	1
45	2	2020-03-24	22	3	4	1
46	0	2020-03-24	2	0	4	0
46	1	2020-03-24	2	0	2	0
46	2	2020-03-24	0	0	2	0
47	0	2020-03-24	16	2	2	1
47	1	2020-03-24	9	1	1	1
47	2	2020-03-24	7	1	1	0
48	0	2020-03-24	7	2	2	0
48	1	2020-03-24	6	2	1	0
48	2	2020-03-24	1	0	1	0
49	0	2020-03-24	58	15	48	5
49	1	2020-03-24	29	8	27	4
49	2	2020-03-24	29	7	21	1
50	0	2020-03-24	20	6	4	2
50	1	2020-03-24	11	5	2	0
50	2	2020-03-24	9	1	2	2
51	0	2020-03-24	145	33	52	10
51	1	2020-03-24	87	26	22	8
51	2	2020-03-24	58	7	30	2
52	0	2020-03-24	24	6	11	5
52	1	2020-03-24	12	3	3	3
52	2	2020-03-24	12	3	8	2
53	0	2020-03-24	14	2	3	1
53	1	2020-03-24	10	2	1	1
53	2	2020-03-24	4	0	2	0
54	0	2020-03-24	161	79	25	24
54	1	2020-03-24	90	50	10	14
54	2	2020-03-24	71	29	14	10
55	0	2020-03-24	96	7	20	9
55	1	2020-03-24	45	3	6	7
55	2	2020-03-24	50	4	14	2
56	0	2020-03-24	67	14	43	17
56	1	2020-03-24	41	12	19	10
56	2	2020-03-24	26	2	24	7
57	0	2020-03-24	525	101	80	65
57	1	2020-03-24	275	76	38	33
57	2	2020-03-24	240	24	40	32
58	0	2020-03-24	3	2	0	0
58	1	2020-03-24	2	2	0	0
58	2	2020-03-24	1	0	0	0
59	0	2020-03-24	183	76	32	19
59	1	2020-03-24	110	57	21	12
59	2	2020-03-24	73	19	11	7
60	0	2020-03-24	189	35	71	38
[truncated: 44,060 more rows]
