# Supplementary material for: Beliefs and Risk Perceptions About COVID-19: Evidence From Two Successive French Representative Surveys During Lockdown
Source: Front Psychol. 2021 Feb 1;12:619145. doi: 10.3389/fpsyg.2021.619145 (PMC7882490; doi:10.3389/fpsyg.2021.619145)
Supplement: Supplementary file 2 [file Data_Sheet_1.ZIP › Evidence_Age.txt]

	survey2	age_cat	deaths	diagnosed	pop	death_rate	diagnosed_rate	case_fatality_rate
1	0	20-29	4	1022	7470908	5.35410153625235e-07	0.000136797294251248	0.00391389432485323
2	0	30-39	15	2161	8288257	1.80978944065079e-06	0.000260730332083091	0.00694123091161499
3	0	40-49	45	3855	8584449	5.24203708356821e-06	0.000449067843492343	0.0116731517509728
4	0	50-59	168	7053	8785106	1.9123275234243e-05	0.000802836072780454	0.0238196512122501
5	0	60-69	430	9080	7999606	5.37526473178804e-05	0.00113505590150315	0.0473568281938326
6	0	70+	3310	16971	9850634	0.000336018981113297	0.00172283327144222	0.195038595250722
7	1	20-29	16	2046	7470908	2.14164061450094e-06	0.000273862293579308	0.00782013685239492
8	1	30-39	62	3992	8288257	7.4804630213566e-06	0.000481645296471864	0.0155310621242485
9	1	40-49	172	6703	8584449	2.00362306305274e-05	0.000780830546025726	0.0256601521706698
10	1	50-59	633	11621	8785106	7.20537691861658e-05	0.00132280703272106	0.0544703553911023
11	1	60-69	1621	14881	7999606	0.000202634979772754	0.00186021661566832	0.108930851421275
12	1	70+	11407	36058	9850634	0.00115799653098471	0.00366047505165657	0.316351433801098
