# Supplementary material for: Beliefs and Risk Perceptions About COVID-19: Evidence From Two Successive French Representative Surveys During Lockdown
Source: Front Psychol. 2021 Feb 1;12:619145. doi: 10.3389/fpsyg.2021.619145 (PMC7882490; doi:10.3389/fpsyg.2021.619145)
Supplement: Supplementary file 2 [file Data_Sheet_1.ZIP › Evidence_Gender.txt]

	survey2	sexe	deaths	diagnosed	pop	death_rate	diagnosed_rate	case_fatality_rate	gender
1	0	1	2467	24351	32397179	7.61486054078968e-05	0.000751639517749369	0.101310007802554	Male
2	0	2	1532	16397	34666524	4.41924895613993e-05	0.000472992331160747	0.0934317253156065	Female
3	1	1	8272	41347	32397179	0.00025533087309855	0.00127625309598715	0.200062882434034	Male
4	1	2	5625	34850	34666524	0.000162260283148088	0.00100529259870416	0.161406025824964	Female
