# Supplementary material for: Beliefs and Risk Perceptions About COVID-19: Evidence From Two Successive French Representative Surveys During Lockdown
Source: Front Psychol. 2021 Feb 1;12:619145. doi: 10.3389/fpsyg.2021.619145 (PMC7882490; doi:10.3389/fpsyg.2021.619145)
Supplement: Supplementary file 2 [file Data_Sheet_1.ZIP › Evidence_Region.txt]

	survey2	region	reg	pop	deaths	diagnosed	death_rate	diagnosed_rate	case_fatality_rate	region_cat
1	0	Auvergne-Rhône-Alpes	84	8032377	349	4500	4.34491558351905e-05	0.000560232668362055	0.0775555555555556	Medium incidence
2	0	Bourgogne-Franche-Comté	27	2783039	230	1834	8.26434699621529e-05	0.000658991843089515	0.125408942202835	Medium incidence
3	0	Bretagne	53	3340379	55	623	1.64651975120188e-05	0.00018650578272705	0.0882825040128411	Lowest incidence
4	0	Centre-Val de Loire	24	2559073	77	853	3.00890205164136e-05	0.000333323824681828	0.0902696365767878	Medium incidence
5	0	Corse	94	344679	21	223	6.09262531224705e-05	0.000646978783157663	0.0941704035874439	Medium incidence
6	0	Grand Est	44	5511747	1126	7363	0.000204290944413813	0.00133587408856031	0.152926796142877	Highest incidence
7	0	Hauts-de-France	32	5962662	330	2816	5.53444082525557e-05	0.000472272283755142	0.1171875	Medium incidence
8	0	Île-de-France	11	12278210	1369	15245	0.000111498337298352	0.00124163049825667	0.0897999344047229	Highest incidence
9	0	Normandie	28	3303500	69	928	2.08869380959588e-05	0.000280914181928258	0.0743534482758621	Lowest incidence
10	0	Nouvelle-Aquitaine	75	5999982	82	1329	1.36667076667897e-05	0.000221500664501994	0.0617005267118134	Lowest incidence
11	0	Occitanie	76	5924858	108	1754	1.82282849648042e-05	0.000296040850261728	0.0615735461801596	Lowest incidence
12	0	Pays de la Loire	52	3801797	82	978	2.15687476211907e-05	0.000257246770408836	0.0838445807770961	Lowest incidence
13	0	Provence-Alpes-Côte d'Azur	93	5055651	124	2705	2.45270094790958e-05	0.000535044843878662	0.0458410351201479	Medium incidence
14	1	Auvergne-Rhône-Alpes	84	8032377	1212	7769	0.00015088933201218	0.000967210577889957	0.156004633801004	Medium incidence
15	1	Bourgogne-Franche-Comté	27	2783039	786	3644	0.000282425075609792	0.0013093600197482	0.21569703622393	Medium incidence
16	1	Bretagne	53	3340379	202	1237	6.04721799532328e-05	0.000370317260406678	0.163298302344382	Lowest incidence
17	1	Centre-Val de Loire	24	2559073	348	2174	0.000135986742074181	0.000849526371463417	0.160073597056118	Medium incidence
18	1	Corse	94	344679	50	245	0.000145062507434454	0.000710806286428822	0.204081632653061	Medium incidence
19	1	Grand Est	44	5511747	2714	12132	0.000492402862468107	0.00220111699611757	0.223705901747445	Highest incidence
20	1	Hauts-de-France	32	5962662	1281	6446	0.000214836930216739	0.00108106077453325	0.198727893267142	Medium incidence
21	1	Île-de-France	11	12278210	5516	29276	0.000449251153058956	0.00238438664919398	0.188413717721	Highest incidence
22	1	Normandie	28	3303500	314	1705	9.50507037990011e-05	0.00051611926744362	0.1841642228739	Lowest incidence
23	1	Nouvelle-Aquitaine	75	5999982	289	2116	4.81668111671002e-05	0.000352667724669841	0.136578449905482	Lowest incidence
24	1	Occitanie	76	5924858	361	2902	6.09297302990215e-05	0.000489800768220943	0.124396967608546	Lowest incidence
25	1	Pays de la Loire	52	3801797	307	1930	8.07512868256774e-05	0.000507654669620708	0.159067357512953	Lowest incidence
26	1	Provence-Alpes-Côte d'Azur	93	5055651	625	5326	0.000123624039713184	0.00105347461681987	0.117348854675178	Medium incidence
