# Supplementary material for: Beliefs and Risk Perceptions About COVID-19: Evidence From Two Successive French Representative Surveys During Lockdown
Source: Front Psychol. 2021 Feb 1;12:619145. doi: 10.3389/fpsyg.2021.619145 (PMC7882490; doi:10.3389/fpsyg.2021.619145)
Supplement: Supplementary file 2 [file Data_Sheet_1.ZIP › raw_data.txt]

	ID	COMPTEUR	SEXE	AGE	RAGE1	RAGE2	RAGE3	XRAGE	jz2cinsee	AGGLOIFOP0	AGGLO	TYPCOM	TAILCOM	DPT	REG	REG2	REG3	REG22	REG13	REG12	SITI	PPIA	PI0	PIQ	PI1	STC	PI2	TITC	STCA	STCB	STCC	DIPL1	DIPL2	DIPL3	DIPLFIL	FOYER	ENF14	REV	REVR	REV21	REV22	REV23	REV24	REV25	REV26	NBUC_T	RUC_A	TRUC	CPL
1	143056881990696	3	1	53	5	5	6	2	75111	9	5	1	11	75	1	1	1	12	8	7	2	9	3	3	3	3	1	NA	5	7	5	2	11	8	8	1	NA	4	4	NA	NA	NA	2800	NA	NA	1	2800	2	4
2	143056882139184	3	2	55	5	5	6	4	13213	8	4	1	11	13	9	5	2	21	13	12	1	9	3	3	3	3	1	NA	2	2	2	2	10	7	7	2	0	5	5	NA	NA	NA	NA	3700	NA	1.5	2466.66666666667	2	1
3	143056882322490	3	1	59	5	5	6	2	54483	5	3	1	5	54	3	2	2	15	1	1	1	16	4	4	4	3	1	NA	2	2	2	2	10	7	7	2	0	6	6	NA	NA	NA	NA	NA	4500	1.5	3000	2	1
4	143056882692169	3	2	45	4	4	5	4	1173	4	2	1	7	1	8	5	2	22	3	3	1	14	4	4	4	5	2	2	3	5	4	2	8	6	5	4	1	6	6	NA	NA	NA	NA	NA	4000	2.3	1739.13043478261	4	1
5	143056882765900	3	1	59	5	5	6	2	83116	4	2	5	7	83	9	5	2	21	13	12	1	3	2	2	2	1	3	NA	1	1	1	2	11	8	8	3	0	6	6	NA	NA	NA	NA	NA	5000	2	2500	2	2
6	143056882847827	3	2	81	7	6	8	4	30189	7	4	1	11	30	9	5	2	13	9	8	3	11	7	7	7	NA	NA	NA	7	8	NA	2	11	8	8	2	0	5	5	NA	NA	NA	NA	3500	NA	1.5	2333.33333333333	3	1
7	143056882863189	3	1	34	3	3	4	1	75110	9	5	1	11	75	1	1	1	12	8	7	1	18	5	5	5	5	2	2	3	5	4	2	9	6	6	2	0	4	4	NA	NA	NA	2850	NA	NA	1.5	1900	3	4
8	143056882867288	3	1	33	3	3	4	1	92048	9	5	2	9	92	1	1	1	12	8	7	7	30	10	7	8	NA	NA	NA	8	8	NA	2	10	7	7	2	0	7	7	NA	NA	NA	NA	NA	NA	NA	NA	NA	2
9	143056882965599	3	1	65	6	6	7	2	59107	2	2	5	4	59	2	2	2	17	10	9	3	10	7	7	7	NA	NA	NA	7	8	NA	2	11	8	8	2	0	5	5	NA	NA	NA	NA	3825	NA	1.5	2550	2	1
10	143056882966624	3	2	52	5	5	6	4	31555	8	4	1	11	31	7	4	2	16	9	8	1	22	5	5	5	3	1	NA	2	2	2	2	10	7	7	2	0	5	5	NA	NA	NA	NA	3150	NA	1.5	2100	3	1
11	143056882974818	3	1	45	4	4	5	2	29232	6	3	1	10	29	6	3	2	6	5	5	1	18	5	5	5	6	2	2	3	5	4	2	10	7	7	4	1	3	3	NA	NA	1550	NA	NA	NA	2.3	673.913043478261	6	1
12	143056883070052	3	2	70	6	6	8	4	69204	8	4	2	8	69	8	5	2	22	3	3	3	6	7	7	7	NA	NA	NA	7	8	NA	2	10	7	7	2	0	5	5	NA	NA	NA	NA	3800	NA	1.5	2533.33333333333	2	1
13	143056883131497	3	2	40	4	4	5	4	67556	1	1	6	1	67	3	2	2	1	1	1	1	12	4	4	4	3	1	NA	2	2	2	2	11	8	8	4	2	5	5	NA	NA	NA	NA	3500	NA	2.1	1666.66666666667	4	1
14	143056883135596	3	2	68	6	6	7	4	67482	8	4	1	11	67	3	2	2	1	1	1	3	8	7	7	7	NA	NA	NA	7	8	NA	2	11	8	8	1	NA	2	2	NA	1120	NA	NA	NA	NA	1	1120	5	3
15	143056883135597	3	1	57	5	5	6	2	77373	9	5	3	9	77	1	1	1	12	8	7	1	14	4	4	4	5	2	2	3	5	4	2	11	8	8	2	0	6	6	NA	NA	NA	NA	NA	4500	1.5	3000	2	1
16	143056883162227	3	2	62	5	5	7	4	6027	8	4	3	9	6	9	5	2	21	13	12	3	19	8	7	7	NA	NA	NA	7	8	NA	2	6	5	4	1	NA	7	7	NA	NA	NA	NA	NA	NA	NA	NA	NA	3
17	143056883181687	3	2	83	7	6	8	4	29039	5	3	1	7	29	6	3	2	6	5	5	3	15	7	7	7	NA	NA	NA	7	8	NA	2	4	3	2	1	NA	4	4	NA	NA	NA	2200	NA	NA	1	2200	3	3
18	143056883186809	3	2	81	7	6	8	4	33118	8	4	2	2	33	7	4	2	2	2	2	3	20	8	7	7	NA	NA	NA	7	8	NA	2	5	4	3	1	NA	3	3	NA	NA	1700	NA	NA	NA	1	1700	4	3
19	143056883187834	3	1	46	4	4	5	2	40192	5	3	1	8	40	7	4	2	2	2	2	1	6	3	3	3	5	2	2	3	5	4	2	11	8	8	3	2	5	5	NA	NA	NA	NA	3150	NA	1.6	1968.75	3	3
20	143056883192955	3	2	57	5	5	6	4	13204	8	4	1	11	13	9	5	2	21	13	12	3	7	7	7	7	NA	NA	NA	7	8	NA	2	11	8	8	2	0	7	7	NA	NA	NA	NA	NA	NA	NA	NA	NA	1
21	143056883269643	3	2	67	6	6	7	4	69027	8	4	2	7	69	8	5	2	22	3	3	3	16	7	7	7	NA	NA	NA	7	8	NA	2	8	6	5	2	0	2	2	NA	1450	NA	NA	NA	NA	1.5	966.666666666667	5	4
22	143056883291150	3	1	54	5	5	6	2	71270	5	3	1	9	71	4	2	2	5	4	4	2	21	5	5	5	9	1	NA	5	7	5	2	6	5	4	1	NA	2	2	NA	1450	NA	NA	NA	NA	1	1450	4	4
23	143056883335189	3	1	57	5	5	6	2	77171	5	3	1	5	77	1	1	1	12	8	7	1	9	3	3	3	3	1	NA	2	2	2	2	11	8	8	4	0	6	6	NA	NA	NA	NA	NA	7000	2.5	2800	2	1
24	143056883399707	3	2	32	3	3	4	3	35060	1	1	6	2	35	6	3	2	6	5	5	1	18	5	5	5	4	2	NA	2	3	3	2	9	6	6	3	1	2	2	NA	1350	NA	NA	NA	NA	1.8	750	6	1
25	143056883441698	3	1	68	6	6	7	2	11262	6	3	5	10	11	9	5	2	13	9	8	3	15	7	7	7	NA	NA	NA	7	8	NA	2	8	6	5	2	0	5	5	NA	NA	NA	NA	3100	NA	1.5	2066.66666666667	3	1
26	143056883444771	3	1	51	5	5	6	2	41073	1	1	6	1	41	5	3	2	7	6	6	1	10	3	3	3	3	1	NA	2	2	2	2	9	6	6	2	0	6	6	NA	NA	NA	NA	NA	4600	1.5	3066.66666666667	2	1
27	143056883615795	3	2	51	5	5	6	4	29130	2	2	5	5	29	6	3	2	6	5	5	1	9	3	3	3	3	1	NA	2	2	2	2	10	7	7	4	0	6	6	NA	NA	NA	NA	NA	5000	2.5	2000	3	1
28	143056883673144	3	1	39	4	4	4	2	33256	2	2	5	4	33	7	4	2	2	2	2	1	23	6	6	6	3	1	NA	2	2	2	2	9	6	6	2	0	4	4	NA	NA	NA	2900	NA	NA	1.5	1933.33333333333	3	1
29	143056883716161	3	2	59	5	5	6	4	47128	6	3	3	2	47	7	4	2	2	2	2	6	17	7	7	8	NA	NA	NA	8	8	NA	2	10	7	7	3	0	6	6	NA	NA	NA	NA	NA	4200	2	2100	3	1
30	143056883729479	3	2	38	4	4	4	4	38151	8	4	4	9	38	8	5	2	22	3	3	1	12	4	4	4	3	1	NA	2	2	2	2	10	7	7	1	NA	3	3	NA	NA	1800	NA	NA	NA	1	1800	4	4
31	143056883832910	3	2	54	5	5	6	4	42189	8	4	4	6	42	8	5	2	22	3	3	1	14	4	4	4	6	2	2	3	5	4	2	11	8	8	1	NA	3	3	NA	NA	1900	NA	NA	NA	1	1900	3	3
32	143056883914839	3	2	52	5	5	6	4	49007	8	4	1	11	49	6	3	2	18	12	11	1	15	4	4	4	3	1	NA	2	2	2	1	10	1	7	3	1	6	6	NA	NA	NA	NA	NA	5100	1.8	2833.33333333333	2	1
33	143056883926105	3	1	72	6	6	8	2	91249	4	2	2	4	91	1	1	1	12	8	7	3	16	7	7	7	NA	NA	NA	7	8	NA	2	10	7	7	2	0	5	5	NA	NA	NA	NA	3800	NA	1.5	2533.33333333333	2	1
34	143056883940443	3	2	37	4	4	4	4	58194	6	3	1	9	58	4	2	2	5	4	4	6	12	7	7	8	NA	NA	NA	8	8	NA	2	8	6	5	5	3	7	7	NA	NA	NA	NA	NA	NA	NA	NA	NA	1
35	143056883949663	3	1	50	5	5	6	2	22325	4	2	3	3	22	6	3	2	6	5	5	1	2	2	2	2	2	4	NA	2	1	1	2	6	5	4	2	0	2	2	NA	1000	NA	NA	NA	NA	1.5	666.666666666667	6	3
36	143056883983459	3	1	29	3	3	3	1	77449	3	2	5	5	77	1	1	1	12	8	7	2	21	5	5	5	3	1	NA	5	7	5	2	10	7	7	3	1	2	2	NA	1080	NA	NA	NA	NA	1.8	600	6	1
37	143056884125806	3	2	63	5	5	7	4	72181	8	4	1	11	72	6	3	2	18	12	11	3	18	8	7	7	NA	NA	NA	7	8	NA	2	6	5	4	1	NA	2	2	NA	1396	NA	NA	NA	NA	1	1396	4	3
38	143056884190325	3	1	71	6	6	8	2	92049	9	5	2	9	92	1	1	1	12	8	7	3	9	7	7	7	NA	NA	NA	7	8	NA	2	10	7	7	1	NA	4	4	NA	NA	NA	2100	NA	NA	1	2100	3	4
39	143056884260870	3	2	67	6	6	7	4	33063	8	4	1	11	33	7	4	2	2	2	2	3	15	7	7	7	NA	NA	NA	7	8	NA	2	8	6	5	1	NA	2	2	NA	1100	NA	NA	NA	NA	1	1100	5	3
40	143056884265993	3	2	34	3	3	4	3	28085	6	3	1	9	28	5	3	2	7	6	6	1	5	3	3	3	1	3	NA	1	1	1	2	11	8	8	3	1	2	2	NA	1200	NA	NA	NA	NA	1.8	666.666666666667	6	1
41	143056884440108	3	1	22	2	2	3	1	69255	8	4	2	5	69	8	5	2	22	3	3	1	27	6	6	6	3	1	NA	2	2	2	2	6	5	4	2	0	3	3	NA	NA	1800	NA	NA	NA	1.5	1200	5	4
42	143056884440109	3	2	50	5	5	6	4	91687	9	5	3	9	91	1	1	1	12	8	7	1	22	5	5	5	3	1	NA	2	2	2	2	9	6	6	3	0	3	3	NA	NA	1800	NA	NA	NA	2	900	5	3
43	143056884503612	3	2	27	3	3	3	3	83137	8	4	1	11	83	9	5	2	21	13	12	1	4	2	2	2	1	3	NA	1	1	1	1	11	1	8	5	2	4	4	NA	NA	NA	2560	NA	NA	2.6	984.615384615385	5	1
44	143056884516927	3	1	65	6	6	7	2	69282	8	4	3	9	69	8	5	2	22	3	3	3	18	8	7	7	NA	NA	NA	7	8	NA	2	5	4	3	1	NA	2	2	NA	1400	NA	NA	NA	NA	1	1400	4	3
45	143056884538435	3	2	24	2	2	3	3	75108	9	5	1	11	75	1	1	1	12	8	7	4	NA	10	8	8	NA	NA	NA	5	8	5	2	11	8	8	4	0	5	5	NA	NA	NA	NA	3800	NA	2.5	1520	4	3
46	143056884616276	3	1	76	7	6	8	2	37122	8	4	4	9	37	5	3	2	7	6	6	3	23	8	7	7	NA	NA	NA	7	8	NA	2	4	3	2	2	0	4	4	NA	NA	NA	2400	NA	NA	1.5	1600	4	1
47	143056884621397	3	2	49	4	4	5	4	38100	2	2	5	3	38	8	5	2	22	3	3	1	22	5	5	5	9	1	NA	2	2	2	2	6	5	4	2	0	4	4	NA	NA	NA	2800	NA	NA	1.5	1866.66666666667	3	1
48	143056884649049	3	1	68	6	6	7	2	29151	5	3	1	7	29	6	3	2	6	5	5	3	20	8	7	7	NA	NA	NA	7	8	NA	2	9	6	6	1	NA	7	7	NA	NA	NA	NA	NA	NA	NA	NA	NA	3
49	143056884764782	3	2	79	7	6	8	4	69143	8	4	3	5	69	8	5	2	22	3	3	3	22	8	7	7	NA	NA	NA	7	8	NA	2	6	5	4	2	0	1	1	900	NA	NA	NA	NA	NA	1.5	600	6	3
50	143056884782195	3	1	26	3	3	3	1	21231	8	4	1	11	21	4	2	2	5	4	4	4	NA	10	8	8	NA	NA	NA	5	8	5	2	8	6	5	2	0	1	1	500	NA	NA	NA	NA	NA	1.5	333.333333333333	6	3
51	143056884848642	3	1	63	5	5	7	2	59350	8	4	1	11	59	2	2	2	17	10	9	3	23	8	7	7	NA	NA	NA	7	8	NA	2	6	5	4	1	NA	2	2	NA	1498	NA	NA	NA	NA	1	1498	4	3
52	143056884879367	3	1	26	3	3	3	1	77294	9	5	3	7	77	1	1	1	12	8	7	1	21	5	5	5	3	1	NA	2	2	2	2	10	7	7	2	0	4	4	NA	NA	NA	2440	NA	NA	1.5	1626.66666666667	4	1
53	143056885126204	3	2	22	2	2	3	3	75117	9	5	1	11	75	1	1	1	12	8	7	1	15	4	4	4	3	1	NA	2	2	2	1	10	1	7	1	NA	2	2	NA	1200	NA	NA	NA	NA	1	1200	5	4
54	143056885126205	3	1	45	4	4	5	2	95566	2	2	5	3	95	1	1	1	12	8	7	1	20	5	5	5	3	1	NA	2	2	2	2	6	5	4	3	0	5	5	NA	NA	NA	NA	3200	NA	2	1600	4	1
55	143056885250142	3	2	30	3	3	4	3	11411	1	1	6	1	11	9	5	2	13	9	8	1	24	6	6	6	3	1	NA	2	2	2	2	9	6	6	3	1	4	4	NA	NA	NA	2500	NA	NA	1.8	1388.88888888889	4	1
56	143056885382145	3	1	22	2	2	3	1	84007	8	4	1	10	84	9	5	2	21	13	12	1	9	3	3	3	3	1	NA	2	2	2	1	11	1	8	2	0	3	3	NA	NA	1800	NA	NA	NA	1.5	1200	5	1
57	143056885786718	3	2	20	2	2	3	3	8491	3	2	1	4	8	4	2	2	8	1	1	5	NA	9	8	8	NA	NA	NA	6	8	NA	1	8	1	5	3	0	4	4	NA	NA	NA	2200	NA	NA	2	1100	5	2
58	143056886292566	3	1	81	7	6	8	2	13070	8	4	3	5	13	9	5	2	21	13	12	3	10	7	7	7	NA	NA	NA	7	8	NA	2	11	8	8	2	0	5	5	NA	NA	NA	NA	3100	NA	1.5	2066.66666666667	3	1
59	143056886994969	3	1	32	3	3	4	1	86194	7	4	1	10	86	6	3	2	20	2	2	1	15	4	4	4	3	1	NA	2	2	2	1	11	1	8	2	0	5	5	NA	NA	NA	NA	3600	NA	1.5	2400	3	2
60	143056887762957	3	2	38	4	4	4	4	42237	8	4	3	5	42	8	5	2	22	3	3	1	12	4	4	4	7	2	4	3	4	4	2	10	7	7	5	3	5	5	NA	NA	NA	NA	3800	NA	2.4	1583.33333333333	4	1
61	143056887772177	3	2	27	3	3	3	3	88413	5	3	1	7	88	3	2	2	15	1	1	7	30	10	7	8	NA	NA	NA	8	8	NA	2	6	5	4	5	1	1	1	650	NA	NA	NA	NA	NA	2.8	232.142857142857	6	3
62	143056887783447	3	2	38	4	4	4	4	76540	8	4	1	11	76	5	3	2	11	11	10	1	20	5	5	5	3	1	NA	2	2	2	2	9	6	6	3	1	4	4	NA	NA	NA	2500	NA	NA	1.8	1388.88888888889	4	1
63	143056888251450	3	2	34	3	3	4	3	86070	3	2	5	5	86	6	3	2	20	2	2	1	18	5	5	5	5	2	2	3	5	4	2	11	8	8	4	2	5	5	NA	NA	NA	NA	3900	NA	2.1	1857.14285714286	4	1
64	143056888336492	3	2	24	2	2	3	3	41173	1	1	6	3	41	5	3	2	7	6	6	1	21	5	5	5	3	1	NA	2	2	2	2	6	5	4	2	0	4	4	NA	NA	NA	2500	NA	NA	1.5	1666.66666666667	4	1
65	143056888350838	3	2	53	5	5	6	4	84141	8	4	3	7	84	9	5	2	21	13	12	1	18	5	5	5	5	2	2	3	5	4	2	10	7	7	2	1	3	3	NA	NA	1800	NA	NA	NA	1.3	1384.61538461538	4	4
66	143056888350839	3	2	37	4	4	4	4	69387	8	4	1	11	69	8	5	2	22	3	3	1	18	5	5	5	5	2	3	3	4	4	2	10	7	7	2	0	4	4	NA	NA	NA	2700	NA	NA	1.5	1800	4	1
67	143056888368145	3	2	55	5	5	6	4	25103	1	1	6	1	25	3	2	2	10	4	4	7	22	8	7	8	NA	NA	NA	8	8	NA	2	7	5	4	3	0	7	7	NA	NA	NA	NA	NA	NA	NA	NA	NA	1
68	143056888374293	3	2	37	4	4	4	4	37233	8	4	4	7	37	5	3	2	7	6	6	1	12	4	4	4	3	1	NA	2	2	2	2	7	5	4	5	3	4	4	NA	NA	NA	2990	NA	NA	2.4	1245.83333333333	5	1
69	143056888386616	3	2	18	2	2	2	3	60471	4	2	1	7	60	4	2	2	19	10	9	4	NA	10	8	8	NA	NA	NA	5	8	5	2	3	2	1	2	0	1	1	500	NA	NA	NA	NA	NA	1.5	333.333333333333	6	4
70	143056888387644	3	2	58	5	5	6	4	33318	8	4	3	10	33	7	4	2	2	2	2	1	30	10	8	8	3	1	NA	2	2	2	2	10	7	7	1	NA	4	4	NA	NA	NA	2300	NA	NA	1	2300	3	3
71	143065114660866	3	1	80	7	6	8	2	61145	2	2	5	4	61	5	3	2	4	11	10	3	6	7	7	7	NA	NA	NA	7	8	NA	2	5	4	3	1	NA	5	5	NA	NA	NA	NA	3318	NA	1	3318	1	3
72	143065114672132	3	1	59	5	5	6	2	75111	9	5	1	11	75	1	1	1	12	8	7	1	14	4	4	4	5	2	2	3	5	4	2	10	7	7	2	0	6	6	NA	NA	NA	NA	NA	10000	1.5	6666.66666666667	1	1
73	143065114678277	3	2	51	5	5	6	4	95197	9	5	3	8	95	1	1	1	12	8	7	1	20	5	5	5	3	1	NA	2	2	2	2	9	6	6	3	0	4	4	NA	NA	NA	2200	NA	NA	2	1100	5	3
74	143065114738700	3	1	59	5	5	6	2	51108	6	3	1	9	51	4	2	2	8	1	1	1	5	3	3	3	1	3	NA	1	1	1	2	11	8	8	1	NA	6	6	NA	NA	NA	NA	NA	5000	1	5000	1	4
75	143065114782743	3	1	51	5	5	6	2	75120	9	5	1	11	75	1	1	1	12	8	7	1	15	4	4	4	3	1	NA	2	2	2	1	11	1	8	3	1	4	4	NA	NA	NA	2900	NA	NA	1.8	1611.11111111111	4	1
76	143065114806301	3	2	70	6	6	8	4	59139	4	2	1	7	59	2	2	2	17	10	9	3	7	7	7	7	NA	NA	NA	7	8	NA	2	11	8	8	1	NA	3	3	NA	NA	1750	NA	NA	NA	1	1750	4	3
77	143065114808350	3	1	75	7	6	8	2	75114	9	5	1	11	75	1	1	1	12	8	7	3	6	7	7	7	NA	NA	NA	7	8	NA	2	11	8	8	2	0	7	7	NA	NA	NA	NA	NA	NA	NA	NA	NA	1
78	143065114840099	3	1	80	7	6	8	2	79191	6	3	1	10	79	6	3	2	20	2	2	3	5	7	7	7	NA	NA	NA	7	8	NA	2	11	8	8	2	0	6	6	NA	NA	NA	NA	NA	4800	1.5	3200	1	1
79	143065114859559	3	2	75	7	6	8	4	78643	9	5	2	7	78	1	1	1	12	8	7	3	30	10	7	7	NA	NA	NA	7	8	NA	2	4	3	2	2	0	4	4	NA	NA	NA	2600	NA	NA	1.5	1733.33333333333	4	1
80	143065114885163	3	1	84	7	6	8	2	33063	8	4	1	11	33	7	4	2	2	2	2	3	10	7	7	7	NA	NA	NA	7	8	NA	2	11	8	8	2	0	6	6	NA	NA	NA	NA	NA	4515	1.5	3010	2	1
81	143065114888236	3	2	65	6	6	7	4	13208	8	4	1	11	13	9	5	2	21	13	12	3	15	7	7	7	NA	NA	NA	7	8	NA	2	10	7	7	2	0	6	6	NA	NA	NA	NA	NA	5500	1.5	3666.66666666667	1	1
82	143065114891310	3	2	57	5	5	6	4	21122	1	1	6	1	21	4	2	2	5	4	4	1	22	5	5	5	9	1	NA	2	2	2	2	6	5	4	2	0	3	3	NA	NA	1900	NA	NA	NA	1.5	1266.66666666667	5	1
83	143065114958904	3	2	70	6	6	8	4	75120	9	5	1	11	75	1	1	1	12	8	7	3	12	7	7	7	NA	NA	NA	7	8	NA	2	10	7	7	1	NA	1	1	980	NA	NA	NA	NA	NA	1	980	5	3
84	143065114961977	3	1	35	4	4	4	2	75113	9	5	1	11	75	1	1	1	12	8	7	1	10	3	3	3	3	1	NA	2	2	2	2	11	8	8	3	1	7	7	NA	NA	NA	NA	NA	NA	NA	NA	NA	1
85	143065114988606	3	1	44	4	4	5	2	27222	1	1	6	1	27	5	3	2	11	11	10	1	14	4	4	4	5	2	2	3	5	4	2	8	6	5	4	2	5	5	NA	NA	NA	NA	3200	NA	2.1	1523.80952380952	4	1
86	143065115000899	3	1	76	7	6	8	2	66136	8	4	1	11	66	9	5	2	13	9	8	3	5	7	7	7	NA	NA	NA	7	8	NA	2	11	8	8	2	0	5	5	NA	NA	NA	NA	3900	NA	1.5	2600	2	1
87	143065115014213	3	1	60	5	5	7	2	13001	8	4	3	11	13	9	5	2	21	13	12	1	10	3	3	3	3	1	NA	2	2	2	2	10	7	7	2	0	6	6	NA	NA	NA	NA	NA	4200	1.5	2800	2	1
88	143065115018310	3	1	75	7	6	8	2	22239	1	1	6	2	22	6	3	2	6	5	5	3	9	7	7	7	NA	NA	NA	7	8	NA	2	8	6	5	2	0	4	4	NA	NA	NA	2925	NA	NA	1.5	1950	3	1
89	143065115048011	3	1	42	4	4	5	2	78646	9	5	2	10	78	1	1	1	12	8	7	1	9	3	3	3	3	1	NA	2	2	2	2	11	8	8	5	3	6	6	NA	NA	NA	NA	NA	5200	2.4	2166.66666666667	3	1
90	143065115056204	3	2	35	4	4	4	4	92014	9	5	2	8	92	1	1	1	12	8	7	1	5	3	3	3	1	3	NA	1	1	1	2	11	8	8	2	0	6	6	NA	NA	NA	NA	NA	6000	1.5	4000	1	1
91	143065115071569	3	2	66	6	6	7	4	34199	3	2	1	5	34	9	5	2	13	9	8	3	6	7	7	7	NA	NA	NA	7	8	NA	2	10	7	7	1	NA	5	5	NA	NA	NA	NA	3900	NA	1	3900	1	3
92	143065115088981	3	1	69	6	6	7	2	85221	1	1	6	3	85	6	3	2	18	12	11	3	3	7	7	7	NA	NA	NA	7	8	NA	2	10	7	7	2	0	4	4	NA	NA	NA	2300	NA	NA	1.5	1533.33333333333	4	1
93	143065115090006	3	1	73	6	6	8	2	83018	4	2	1	3	83	9	5	2	21	13	12	3	19	8	7	7	NA	NA	NA	7	8	NA	2	4	3	2	2	0	4	4	NA	NA	NA	2800	NA	NA	1.5	1866.66666666667	3	1
94	143065115111517	3	1	75	7	6	8	2	13005	8	4	4	9	13	9	5	2	21	13	12	3	10	7	7	7	NA	NA	NA	7	8	NA	2	10	7	7	2	0	7	7	NA	NA	NA	NA	NA	NA	NA	NA	NA	1
95	143065115132002	3	2	34	3	3	4	3	80021	7	4	1	11	80	4	2	2	19	10	9	1	6	3	3	3	5	2	2	3	5	4	2	11	8	8	1	NA	4	4	NA	NA	NA	2100	NA	NA	1	2100	3	3
96	143065115150439	3	2	59	5	5	6	4	1347	8	4	2	2	1	8	5	2	22	3	3	1	27	6	6	6	3	1	NA	2	2	2	2	9	6	6	2	0	4	4	NA	NA	NA	2100	NA	NA	1.5	1400	4	1
97	143065115186288	3	1	68	6	6	7	2	6123	8	4	3	8	6	9	5	2	21	13	12	3	8	7	7	7	NA	NA	NA	7	8	NA	2	7	5	4	1	NA	7	7	NA	NA	NA	NA	NA	NA	NA	NA	NA	3
98	143065115251839	3	2	74	6	6	8	4	13212	8	4	1	11	13	9	5	2	21	13	12	3	7	7	7	7	NA	NA	NA	7	8	NA	2	11	8	8	2	0	6	6	NA	NA	NA	NA	NA	4200	1.5	2800	2	1
99	143065115268099	3	2	49	4	4	5	4	33539	8	4	3	4	33	7	4	2	2	2	2	6	30	10	7	8	NA	NA	NA	8	8	NA	2	7	5	4	4	1	4	4	NA	NA	NA	2500	NA	NA	2.3	1086.95652173913	5	1
100	143065115303946	3	1	75	7	6	8	2	59009	8	4	4	10	59	2	2	2	17	10	9	3	10	7	7	7	NA	NA	NA	7	8	NA	2	10	7	7	2	0	6	6	NA	NA	NA	NA	NA	4500	1.5	3000	2	1
101	143065115831313	3	1	56	5	5	6	2	63113	8	4	1	11	63	8	5	2	3	3	3	1	2	2	2	2	1	3	NA	1	1	1	2	9	6	6	1	NA	2	2	NA	1300	NA	NA	NA	NA	1	1300	5	3
102	143065115857940	3	1	57	5	5	6	2	73243	7	4	2	2	73	8	5	2	22	3	3	7	12	7	7	8	NA	NA	NA	8	8	NA	2	11	8	8	4	0	6	6	NA	NA	NA	NA	NA	7500	2.5	3000	2	1
103	143065115870231	3	1	76	7	6	8	2	92023	9	5	2	10	92	1	1	1	12	8	7	3	7	7	7	7	NA	NA	NA	7	8	NA	2	11	8	8	2	0	7	7	NA	NA	NA	NA	NA	NA	NA	NA	NA	1
104	143065115874328	3	1	75	7	6	8	2	49007	8	4	1	11	49	6	3	2	18	12	11	3	10	7	7	7	NA	NA	NA	7	8	NA	2	11	8	8	2	0	6	6	NA	NA	NA	NA	NA	5000	1.5	3333.33333333333	1	1
105	143065116145705	3	1	71	6	6	8	2	32310	1	1	6	1	32	7	4	2	16	9	8	3	16	7	7	7	NA	NA	NA	7	8	NA	2	9	6	6	2	0	6	6	NA	NA	NA	NA	NA	4250	1.5	2833.33333333333	2	1
106	143065116150826	3	2	36	4	4	4	4	30007	6	3	1	9	30	9	5	2	13	9	8	1	20	5	5	5	6	2	2	3	5	4	2	11	8	8	3	1	7	7	NA	NA	NA	NA	NA	NA	NA	NA	NA	1
107	143065116194860	3	2	33	3	3	4	3	34129	8	4	3	7	34	9	5	2	13	9	8	1	20	5	5	5	3	1	NA	2	2	2	2	7	5	4	4	2	4	4	NA	NA	NA	2800	NA	NA	2.1	1333.33333333333	4	1
108	143065116236852	3	1	68	6	6	7	2	7264	1	1	6	3	7	8	5	2	22	3	3	3	17	7	7	7	NA	NA	NA	7	8	NA	2	4	3	2	2	0	3	3	NA	NA	1745	NA	NA	NA	1.5	1163.33333333333	5	1
109	143065116242999	3	1	59	5	5	6	2	79135	1	1	6	1	79	6	3	2	20	2	2	1	4	2	2	2	1	3	NA	1	1	1	2	11	8	8	2	0	6	6	NA	NA	NA	NA	NA	5300	1.5	3533.33333333333	1	1
110	143065116250169	3	2	76	7	6	8	4	34003	5	3	5	8	34	9	5	2	13	9	8	3	17	7	7	7	NA	NA	NA	7	8	NA	2	8	6	5	1	NA	4	4	NA	NA	NA	2990	NA	NA	1	2990	2	3
111	143065116254266	3	2	43	4	4	5	4	49069	4	2	5	7	49	6	3	2	18	12	11	1	15	4	4	4	3	1	NA	2	2	2	2	10	7	7	4	1	5	5	NA	NA	NA	NA	3850	NA	2.3	1673.91304347826	4	1
112	143065116259387	3	2	43	4	4	5	4	79236	1	1	6	1	79	6	3	2	20	2	2	1	14	4	4	4	4	2	NA	2	3	3	2	10	7	7	4	2	5	5	NA	NA	NA	NA	3300	NA	2.1	1571.42857142857	4	1
113	143065116382277	3	2	47	4	4	5	4	42007	1	1	6	1	42	8	5	2	22	3	3	1	18	5	5	5	6	2	2	3	5	4	2	9	6	6	5	2	7	7	NA	NA	NA	NA	NA	NA	NA	NA	NA	1
114	143065116409929	3	2	39	4	4	4	4	46063	1	1	6	2	46	7	4	2	16	9	8	1	12	4	4	4	6	2	2	3	5	4	2	10	7	7	4	2	5	5	NA	NA	NA	NA	3900	NA	2.1	1857.14285714286	4	1
115	143065116417098	3	1	57	5	5	6	2	13097	4	2	5	7	13	9	5	2	21	13	12	1	2	2	2	2	1	3	NA	1	1	1	2	7	5	4	2	0	7	7	NA	NA	NA	NA	NA	NA	NA	NA	NA	1
116	143065116454992	3	1	53	5	5	6	2	69285	2	2	5	4	69	8	5	2	22	3	3	1	2	2	2	2	1	3	NA	1	1	1	2	6	5	4	2	0	6	6	NA	NA	NA	NA	NA	8500	1.5	5666.66666666667	1	1
117	143065116493911	3	2	72	6	6	8	4	6004	8	4	3	10	6	9	5	2	21	13	12	3	6	7	7	7	NA	NA	NA	7	8	NA	2	9	6	6	2	0	6	6	NA	NA	NA	NA	NA	5000	1.5	3333.33333333333	1	1
118	143065116500057	3	2	76	7	6	8	4	34220	1	1	6	1	34	9	5	2	13	9	8	3	14	7	7	7	NA	NA	NA	7	8	NA	2	8	6	5	1	NA	4	4	NA	NA	NA	2400	NA	NA	1	2400	3	3
119	143065116537951	3	2	67	6	6	7	4	17414	2	2	5	4	17	6	3	2	20	2	2	3	17	7	7	7	NA	NA	NA	7	8	NA	2	8	6	5	2	0	6	6	NA	NA	NA	NA	NA	4300	1.5	2866.66666666667	2	1
120	143065116560484	3	2	34	3	3	4	3	13035	3	2	5	5	13	9	5	2	21	13	12	1	2	2	2	2	1	3	NA	1	1	1	2	10	7	7	2	0	5	5	NA	NA	NA	NA	3800	NA	1.5	2533.33333333333	2	1
121	143065116568680	3	2	58	5	5	6	4	40192	5	3	1	8	40	7	4	2	2	2	2	6	21	8	7	8	NA	NA	NA	8	8	NA	2	3	2	1	2	0	2	2	NA	1335	NA	NA	NA	NA	1.5	890	6	1
122	143065116649589	3	1	64	5	5	7	2	37261	8	4	1	11	37	5	3	2	7	6	6	3	16	7	7	7	NA	NA	NA	7	8	NA	2	10	7	7	2	0	7	7	NA	NA	NA	NA	NA	NA	NA	NA	NA	1
123	143065116661878	3	2	60	5	5	7	4	14494	1	1	6	1	14	5	3	2	4	11	10	3	18	8	7	7	NA	NA	NA	7	8	NA	2	6	5	4	2	0	4	4	NA	NA	NA	2700	NA	NA	1.5	1800	4	1
124	143065116751874	3	1	44	4	4	5	2	85146	4	2	1	8	85	6	3	2	18	12	11	1	23	6	6	6	3	1	NA	2	2	2	1	7	1	4	4	2	7	7	NA	NA	NA	NA	NA	NA	NA	NA	NA	1
125	143065116760068	3	2	32	3	3	4	3	31506	8	4	2	7	31	7	4	2	16	9	8	1	24	6	6	6	3	1	NA	2	2	2	2	9	6	6	1	NA	2	2	NA	1499	NA	NA	NA	NA	1	1499	4	3
126	143065116788748	3	2	76	7	6	8	4	78551	9	5	2	9	78	1	1	1	12	8	7	3	17	7	7	7	NA	NA	NA	7	8	NA	2	5	4	3	1	NA	4	4	NA	NA	NA	2900	NA	NA	1	2900	2	3
127	143065116788749	3	1	77	7	6	8	2	75118	9	5	1	11	75	1	1	1	12	8	7	3	7	7	7	7	NA	NA	NA	7	8	NA	2	11	8	8	2	0	7	7	NA	NA	NA	NA	NA	NA	NA	NA	NA	1
128	143065116814354	3	2	64	5	5	7	4	66186	2	2	5	3	66	9	5	2	13	9	8	3	11	7	7	7	NA	NA	NA	7	8	NA	2	10	7	7	2	0	7	7	NA	NA	NA	NA	NA	NA	NA	NA	NA	1
129	143065116825623	3	2	69	6	6	7	4	89391	1	1	6	2	89	4	2	2	5	4	4	3	12	7	7	7	NA	NA	NA	7	8	NA	2	10	7	7	2	0	5	5	NA	NA	NA	NA	3900	NA	1.5	2600	2	1
130	143065116835866	3	1	76	7	6	8	2	22054	2	2	5	4	22	6	3	2	6	5	5	3	10	7	7	7	NA	NA	NA	7	8	NA	2	11	8	8	2	0	6	6	NA	NA	NA	NA	NA	4500	1.5	3000	2	1
131	143065116872738	3	2	65	6	6	7	4	62637	8	4	4	6	62	2	2	2	17	10	9	3	7	7	7	7	NA	NA	NA	7	8	NA	2	11	8	8	2	0	5	5	NA	NA	NA	NA	3480	NA	1.5	2320	3	1
132	143065116892199	3	2	75	7	6	8	4	42304	6	3	4	5	42	8	5	2	22	3	3	3	9	7	7	7	NA	NA	NA	7	8	NA	2	8	6	5	1	NA	7	7	NA	NA	NA	NA	NA	NA	NA	NA	NA	3
133	143065116896296	3	1	76	7	6	8	2	79158	1	1	6	1	79	6	3	2	20	2	2	3	6	7	7	7	NA	NA	NA	7	8	NA	2	11	8	8	2	0	4	4	NA	NA	NA	2300	NA	NA	1.5	1533.33333333333	4	1
134	143065116901417	3	2	53	5	5	6	4	37203	8	4	2	3	37	5	3	2	7	6	6	1	1	1	1	1	1	3	NA	1	1	1	2	10	7	7	2	0	6	6	NA	NA	NA	NA	NA	6000	1.5	4000	1	1
135	143065117099058	3	2	54	5	5	6	4	91521	9	5	4	8	91	1	1	1	12	8	7	1	27	6	6	6	3	1	NA	2	2	2	2	5	4	3	1	NA	3	3	NA	NA	1500	NA	NA	NA	1	1500	4	4
136	143065117153335	3	1	34	3	3	4	1	43157	5	3	1	7	43	8	5	2	3	3	3	1	26	6	6	6	3	1	NA	2	2	2	2	10	7	7	3	1	4	4	NA	NA	NA	2500	NA	NA	1.8	1388.88888888889	4	1
137	143065117185083	3	2	72	6	6	8	4	45284	8	4	3	8	45	5	3	2	7	6	6	3	6	7	7	7	NA	NA	NA	7	8	NA	2	8	6	5	2	0	7	7	NA	NA	NA	NA	NA	NA	NA	NA	NA	1
138	143065117228097	3	1	30	3	3	4	1	59350	8	4	1	11	59	2	2	2	17	10	9	1	21	5	5	5	3	1	NA	2	2	2	2	8	6	5	1	NA	2	2	NA	1250	NA	NA	NA	NA	1	1250	5	3
139	143065117231170	3	2	81	7	6	8	4	33236	3	2	5	5	33	7	4	2	2	2	2	3	12	7	7	7	NA	NA	NA	7	8	NA	1	10	1	7	2	0	6	6	NA	NA	NA	NA	NA	4183	1.5	2788.66666666667	2	1
140	143065117245508	3	2	50	5	5	6	4	65092	1	1	6	1	65	7	4	2	16	9	8	1	12	4	4	4	5	2	2	3	5	4	2	8	6	5	3	0	3	3	NA	NA	1500	NA	NA	NA	2	750	6	1
141	143065117292616	3	1	44	4	4	5	2	38439	4	2	1	3	38	8	5	2	22	3	3	1	3	2	2	2	1	3	NA	1	1	1	2	10	7	7	1	NA	7	7	NA	NA	NA	NA	NA	NA	NA	NA	NA	4
142	143065117311050	3	1	33	3	3	4	1	31555	8	4	1	11	31	7	4	2	16	9	8	1	26	6	6	6	3	1	NA	2	2	2	2	9	6	6	1	NA	2	2	NA	1250	NA	NA	NA	NA	1	1250	5	3
143	143065117360209	3	2	78	7	6	8	4	6088	8	4	1	11	6	9	5	2	21	13	12	3	15	7	7	7	NA	NA	NA	7	8	NA	2	11	8	8	2	0	7	7	NA	NA	NA	NA	NA	NA	NA	NA	NA	1
144	143065117382738	3	2	72	6	6	8	4	72056	1	1	6	2	72	6	3	2	18	12	11	3	20	8	7	7	NA	NA	NA	7	8	NA	2	7	5	4	2	0	7	7	NA	NA	NA	NA	NA	NA	NA	NA	NA	1
145	143065117385811	3	2	39	4	4	4	4	92040	9	5	2	10	92	1	1	1	12	8	7	1	11	4	4	4	5	2	2	3	5	4	2	11	8	8	1	NA	4	4	NA	NA	NA	2200	NA	NA	1	2200	3	4
146	143065117397078	3	2	75	7	6	8	4	42207	8	4	4	9	42	8	5	2	22	3	3	3	20	8	7	7	NA	NA	NA	7	8	NA	2	9	6	6	1	NA	2	2	NA	1450	NA	NA	NA	NA	1	1450	4	3
147	143065117411416	3	2	33	3	3	4	3	92060	9	5	2	8	92	1	1	1	12	8	7	1	10	3	3	3	3	1	NA	2	2	2	2	11	8	8	1	NA	4	4	NA	NA	NA	2400	NA	NA	1	2400	3	4
148	143065117426778	3	2	72	6	6	8	4	34172	8	4	1	11	34	9	5	2	13	9	8	3	14	7	7	7	NA	NA	NA	7	8	NA	2	7	5	4	1	NA	4	4	NA	NA	NA	2200	NA	NA	1	2200	3	3
149	143065117446238	3	2	79	7	6	8	4	90035	1	1	6	1	90	3	2	2	10	4	4	3	11	7	7	7	NA	NA	NA	7	8	NA	2	8	6	5	2	0	5	5	NA	NA	NA	NA	3800	NA	1.5	2533.33333333333	2	1
150	143065117453410	3	2	75	7	6	8	4	67482	8	4	1	11	67	3	2	2	1	1	1	3	14	7	7	7	NA	NA	NA	7	8	NA	2	6	5	4	1	NA	7	7	NA	NA	NA	NA	NA	NA	NA	NA	NA	3
151	143065117533295	3	2	44	4	4	5	4	7240	3	2	1	3	7	8	5	2	22	3	3	1	17	4	4	4	3	1	NA	2	2	2	2	10	7	7	4	1	6	6	NA	NA	NA	NA	NA	4500	2.3	1956.52173913043	3	1
152	143065117587574	3	2	75	7	6	8	4	95554	3	2	2	1	95	1	1	1	12	8	7	3	20	8	7	7	NA	NA	NA	7	8	NA	2	7	5	4	2	0	3	3	NA	NA	1950	NA	NA	NA	1.5	1300	5	1
153	143065117602938	3	1	78	7	6	8	2	13208	8	4	1	11	13	9	5	2	21	13	12	3	9	7	7	7	NA	NA	NA	7	8	NA	2	8	6	5	1	NA	3	3	NA	NA	1900	NA	NA	NA	1	1900	3	3
154	143065117617276	3	1	43	4	4	5	2	76497	8	4	4	5	76	5	3	2	11	11	10	1	17	4	4	4	3	1	NA	2	2	2	2	10	7	7	4	2	6	6	NA	NA	NA	NA	NA	6200	2.1	2952.38095238095	2	1
155	143065117637759	3	2	68	6	6	7	4	57556	2	2	5	3	57	3	2	2	15	1	1	3	5	7	7	7	NA	NA	NA	7	8	NA	2	11	8	8	2	0	5	5	NA	NA	NA	NA	3500	NA	1.5	2333.33333333333	3	1
156	143065117657088	3	1	64	5	5	7	2	31561	8	4	2	7	31	7	4	2	16	9	8	1	18	5	5	5	4	2	NA	2	3	3	2	8	6	5	2	0	4	4	NA	NA	NA	2800	NA	NA	1.5	1866.66666666667	3	1
157	143065117709319	3	2	75	7	6	8	4	18242	2	2	5	3	18	5	3	2	7	6	6	3	14	7	7	7	NA	NA	NA	7	8	NA	2	6	5	4	2	0	5	5	NA	NA	NA	NA	3600	NA	1.5	2400	3	1
158	143065117983753	3	1	67	6	6	7	2	59421	8	4	2	7	59	2	2	2	17	10	9	3	6	7	7	7	NA	NA	NA	7	8	NA	2	10	7	7	2	0	6	6	NA	NA	NA	NA	NA	6000	1.5	4000	1	1
159	143065117999115	3	2	75	7	6	8	4	84007	8	4	1	10	84	9	5	2	21	13	12	3	7	7	7	7	NA	NA	NA	7	8	NA	2	11	8	8	2	0	4	4	NA	NA	NA	2300	NA	NA	1.5	1533.33333333333	4	1
160	143065118288911	3	2	47	4	4	5	4	27598	5	3	3	2	27	5	3	2	11	11	10	1	20	5	5	5	3	1	NA	2	2	2	2	10	7	7	4	1	6	6	NA	NA	NA	NA	NA	6000	2.3	2608.69565217391	2	1
161	143065118342168	3	1	34	3	3	4	1	34172	8	4	1	11	34	9	5	2	13	9	8	1	15	4	4	4	3	1	NA	2	2	2	2	10	7	7	3	1	5	5	NA	NA	NA	NA	3850	NA	1.8	2138.88888888889	3	1
162	143065118425113	3	2	86	7	6	8	4	17034	1	1	6	1	17	6	3	2	20	2	2	3	7	7	7	7	NA	NA	NA	7	8	NA	2	11	8	8	1	NA	4	4	NA	NA	NA	2400	NA	NA	1	2400	3	3
163	143065118448669	3	2	50	5	5	6	4	67351	1	1	6	2	67	3	2	2	1	1	1	1	21	5	5	5	9	1	NA	2	2	2	1	6	1	4	3	1	4	4	NA	NA	NA	2850	NA	NA	1.8	1583.33333333333	4	1
164	143065118461984	3	2	32	3	3	4	3	62351	8	4	4	5	62	2	2	2	17	10	9	6	30	10	7	8	NA	NA	NA	8	8	NA	2	7	5	4	5	3	2	2	NA	1000	NA	NA	NA	NA	2.4	416.666666666667	6	1
165	143065118481446	3	2	70	6	6	8	4	92009	9	5	2	8	92	1	1	1	12	8	7	3	7	7	7	7	NA	NA	NA	7	8	NA	2	11	8	8	2	0	7	7	NA	NA	NA	NA	NA	NA	NA	NA	NA	1
166	143065119108143	3	2	35	4	4	4	4	83126	8	4	4	10	83	9	5	2	21	13	12	1	20	5	5	5	3	1	NA	2	2	2	2	10	7	7	3	1	4	4	NA	NA	NA	2500	NA	NA	1.8	1388.88888888889	4	1
167	143065119871035	3	1	65	6	6	7	2	77258	9	5	3	7	77	1	1	1	12	8	7	3	17	7	7	7	NA	NA	NA	7	8	NA	2	9	6	6	2	0	7	7	NA	NA	NA	NA	NA	NA	NA	NA	NA	1
168	143065119934527	3	2	65	6	6	7	4	23021	1	1	6	1	23	7	4	2	14	2	2	3	3	7	7	7	NA	NA	NA	7	8	NA	2	2	2	1	1	NA	2	2	NA	1110	NA	NA	NA	NA	1	1110	5	3
169	143065120346182	3	2	53	5	5	6	4	27493	2	2	1	3	27	5	3	2	11	11	10	1	23	6	6	6	3	1	NA	2	2	2	2	6	5	4	2	0	5	5	NA	NA	NA	NA	3200	NA	1.5	2133.33333333333	3	1
170	143065120351303	3	2	39	4	4	4	4	53062	4	2	1	7	53	6	3	2	18	12	11	1	3	2	2	2	1	3	NA	1	1	1	2	7	5	4	1	NA	7	7	NA	NA	NA	NA	NA	NA	NA	NA	NA	3
171	143065120354376	3	2	64	5	5	7	4	17284	1	1	6	2	17	6	3	2	20	2	2	3	10	7	7	7	NA	NA	NA	7	8	NA	2	10	7	7	2	0	4	4	NA	NA	NA	2950	NA	NA	1.5	1966.66666666667	3	1
172	143065120361546	3	1	32	3	3	4	1	49218	4	2	5	7	49	6	3	2	18	12	11	1	23	6	6	6	3	1	NA	2	2	2	2	9	6	6	3	1	2	2	NA	1200	NA	NA	NA	NA	1.8	666.666666666667	6	1
173	143065120601168	3	1	58	5	5	6	2	74264	6	3	3	5	74	8	5	2	22	3	3	1	23	6	6	6	3	1	NA	2	2	2	2	6	5	4	2	0	3	3	NA	NA	1800	NA	NA	NA	1.5	1200	5	1
174	143065120884820	3	2	49	4	4	5	4	1103	2	2	2	2	1	8	5	2	22	3	3	3	11	7	7	7	NA	NA	NA	7	8	NA	2	11	8	8	3	1	4	4	NA	NA	NA	2800	NA	NA	1.8	1555.55555555556	4	1
175	143065121292385	3	1	56	5	5	6	2	78643	9	5	2	7	78	1	1	1	12	8	7	1	16	4	4	4	3	1	NA	2	2	2	2	6	5	4	1	NA	3	3	NA	NA	1575	NA	NA	NA	1	1575	4	2
176	143065121340517	3	2	40	4	4	5	4	42103	8	4	4	5	42	8	5	2	22	3	3	1	26	6	6	6	3	1	NA	2	2	2	2	9	6	6	1	NA	2	2	NA	1300	NA	NA	NA	NA	1	1300	5	3
177	143065122680948	3	2	55	5	5	6	4	76235	1	1	6	3	76	5	3	2	11	11	10	1	29	6	6	6	7	2	2	3	5	4	1	10	1	7	3	0	4	4	NA	NA	NA	2900	NA	NA	2	1450	4	2
178	143065122696309	3	1	53	5	5	6	2	59646	8	4	3	8	59	2	2	2	17	10	9	1	28	6	6	6	3	1	NA	2	2	2	2	6	5	4	1	NA	1	1	850	NA	NA	NA	NA	NA	1	850	6	2
179	143065122807927	3	2	30	3	3	4	3	1163	1	1	6	3	1	8	5	2	22	3	3	1	22	5	5	5	9	1	NA	2	2	2	2	6	5	4	4	2	3	3	NA	NA	1904	NA	NA	NA	2.1	906.666666666667	5	1
180	143065122852986	3	2	75	7	6	8	4	77366	1	1	6	1	77	1	1	1	12	8	7	3	22	8	7	7	NA	NA	NA	7	8	NA	2	2	2	1	2	0	2	2	NA	1350	NA	NA	NA	NA	1.5	900	5	1
181	143065122866300	3	2	28	3	3	3	3	18125	1	1	6	2	18	5	3	2	7	6	6	1	14	4	4	4	3	1	NA	2	2	2	2	10	7	7	2	0	7	7	NA	NA	NA	NA	NA	NA	NA	NA	NA	1
182	143065122907138	3	2	38	4	4	4	4	25620	1	1	6	1	25	3	2	2	10	4	4	1	1	1	1	1	1	3	NA	1	1	1	2	9	6	6	5	2	6	6	NA	NA	NA	NA	NA	4950	2.6	1903.84615384615	3	1
183	143065122920452	3	2	33	3	3	4	3	95306	9	5	2	8	95	1	1	1	12	8	7	1	14	4	4	4	6	2	2	3	5	4	2	11	8	8	2	0	4	4	NA	NA	NA	2800	NA	NA	1.5	1866.66666666667	3	2
184	143065122926597	3	1	71	6	6	8	2	77084	2	2	2	2	77	1	1	1	12	8	7	3	26	8	7	7	NA	NA	NA	7	8	NA	2	6	5	4	2	0	4	4	NA	NA	NA	2850	NA	NA	1.5	1900	3	1
185	143065123075081	3	1	46	4	4	5	2	54046	1	1	6	1	54	3	2	2	15	1	1	1	17	4	4	4	3	1	NA	2	2	2	2	7	5	4	4	2	5	5	NA	NA	NA	NA	3200	NA	2.1	1523.80952380952	4	1
186	143065123075082	3	1	47	4	4	5	2	29160	3	2	5	5	29	6	3	2	6	5	5	2	27	6	6	6	3	1	NA	5	7	5	2	7	5	4	1	NA	7	7	NA	NA	NA	NA	NA	NA	NA	NA	NA	3
187	143065123084299	3	1	81	7	6	8	2	6088	8	4	1	11	6	9	5	2	21	13	12	3	7	7	7	7	NA	NA	NA	7	8	NA	2	11	8	8	1	NA	4	4	NA	NA	NA	2800	NA	NA	1	2800	2	3
188	143065123231763	3	2	75	7	6	8	4	93055	9	5	4	10	93	1	1	1	12	8	7	3	9	7	7	7	NA	NA	NA	7	8	NA	2	10	7	7	2	0	6	6	NA	NA	NA	NA	NA	4544	1.5	3029.33333333333	2	1
189	143065123272726	3	2	71	6	6	8	4	92048	9	5	2	9	92	1	1	1	12	8	7	3	15	7	7	7	NA	NA	NA	7	8	NA	2	8	6	5	2	0	7	7	NA	NA	NA	NA	NA	NA	NA	NA	NA	1
190	143065123317789	3	2	52	5	5	6	4	83137	8	4	1	11	83	9	5	2	21	13	12	1	18	5	5	5	6	2	2	3	5	4	2	6	5	4	2	0	4	4	NA	NA	NA	2400	NA	NA	1.5	1600	4	3
191	143065123318814	3	2	35	4	4	4	4	31091	8	4	3	5	31	7	4	2	16	9	8	1	3	2	2	2	1	3	NA	1	1	1	2	11	8	8	2	0	1	1	650	NA	NA	NA	NA	NA	1.5	433.333333333333	6	1
192	143065123593250	3	1	66	6	6	7	2	62011	1	1	6	1	62	2	2	2	17	10	9	3	10	7	7	7	NA	NA	NA	7	8	NA	2	11	8	8	2	0	5	5	NA	NA	NA	NA	3300	NA	1.5	2200	3	1
193	143065123883049	3	2	23	2	2	3	3	71266	1	1	6	1	71	4	2	2	5	4	4	2	26	6	6	6	3	1	NA	5	7	5	2	3	2	1	3	0	7	7	NA	NA	NA	NA	NA	NA	NA	NA	NA	4
194	143065123891244	3	1	40	4	4	5	2	67066	4	2	1	3	67	3	2	2	1	1	1	1	27	6	6	6	3	1	NA	2	2	2	2	9	6	6	1	NA	3	3	NA	NA	1900	NA	NA	NA	1	1900	3	2
195	143065123984437	3	2	43	4	4	5	4	94003	9	5	3	8	94	1	1	1	12	8	7	2	22	5	5	5	3	1	NA	5	7	5	2	10	7	7	3	1	4	4	NA	NA	NA	2100	NA	NA	1.8	1166.66666666667	5	1
196	143065124157507	3	2	74	6	6	8	4	75114	9	5	1	11	75	1	1	1	12	8	7	3	9	7	7	7	NA	NA	NA	7	8	NA	2	11	8	8	1	NA	4	4	NA	NA	NA	2316	NA	NA	1	2316	3	3
197	143065124368460	3	2	24	2	2	3	3	22164	1	1	6	2	22	6	3	2	6	5	5	1	21	5	5	5	3	1	NA	2	2	2	2	9	6	6	2	0	5	5	NA	NA	NA	NA	3100	NA	1.5	2066.66666666667	3	1
198	143065124375630	3	1	61	5	5	7	2	77056	1	1	6	1	77	1	1	1	12	8	7	3	11	7	7	7	NA	NA	NA	7	8	NA	2	10	7	7	4	1	4	4	NA	NA	NA	2625	NA	NA	2.3	1141.30434782609	5	1
199	143065124532314	3	1	23	2	2	3	1	35281	8	4	4	7	35	6	3	2	6	5	5	1	18	5	5	5	4	2	NA	2	3	3	2	10	7	7	3	1	5	5	NA	NA	NA	NA	3200	NA	1.8	1777.77777777778	4	1
200	143065124544606	3	2	55	5	5	6	4	54159	5	3	1	6	54	3	2	2	15	1	1	1	12	4	4	4	7	2	2	3	5	4	2	10	7	7	2	1	4	4	NA	NA	NA	2600	NA	NA	1.3	2000	3	4
201	143065124888681	3	2	25	3	3	3	3	49218	4	2	5	7	49	6	3	2	18	12	11	1	27	6	6	6	3	1	NA	2	2	2	2	10	7	7	5	0	7	7	NA	NA	NA	NA	NA	NA	NA	NA	NA	2
202	143065124936811	3	1	76	7	6	8	2	6088	8	4	1	11	6	9	5	2	21	13	12	3	6	7	7	7	NA	NA	NA	7	8	NA	2	8	6	5	2	0	4	4	NA	NA	NA	2200	NA	NA	1.5	1466.66666666667	4	1
203	143065125175405	3	2	68	6	6	7	4	44047	8	4	3	8	44	6	3	2	18	12	11	3	18	8	7	7	NA	NA	NA	7	8	NA	2	5	4	3	2	0	7	7	NA	NA	NA	NA	NA	NA	NA	NA	NA	1
204	143065125181550	3	2	45	4	4	5	4	17357	1	1	6	1	17	6	3	2	20	2	2	1	12	4	4	4	3	1	NA	2	2	2	1	9	1	6	2	0	1	1	800	NA	NA	NA	NA	NA	1.5	533.333333333333	6	1
205	143065125478402	3	2	52	5	5	6	4	67101	5	3	2	3	67	3	2	2	1	1	1	1	1	1	1	1	1	3	NA	1	1	1	2	9	6	6	2	0	7	7	NA	NA	NA	NA	NA	NA	NA	NA	NA	1
206	143065125749781	3	2	55	5	5	6	4	95572	9	5	4	8	95	1	1	1	12	8	7	1	18	5	5	5	7	2	2	3	5	4	2	6	5	4	1	NA	2	2	NA	1400	NA	NA	NA	NA	1	1400	4	3
207	143065125900319	3	1	53	5	5	6	2	10387	7	4	1	10	10	4	2	2	8	1	1	1	26	6	6	6	3	1	NA	2	2	2	2	2	2	1	2	0	4	4	NA	NA	NA	2900	NA	NA	1.5	1933.33333333333	3	1
208	143065125909537	3	1	22	2	2	3	1	25558	1	1	6	2	25	3	2	2	10	4	4	1	25	6	6	6	4	2	NA	2	3	3	2	1	2	1	4	0	4	4	NA	NA	NA	2500	NA	NA	2.5	1000	5	4
209	143065126228010	3	1	22	2	2	3	1	80070	1	1	6	2	80	4	2	2	19	10	9	5	NA	9	8	8	NA	NA	NA	6	8	NA	1	11	1	8	3	0	3	3	NA	NA	1900	NA	NA	NA	2	950	5	3
210	143065126251567	3	1	40	4	4	5	2	11254	1	1	6	2	11	9	5	2	13	9	8	1	5	3	3	3	1	3	NA	1	1	1	2	10	7	7	3	1	4	4	NA	NA	NA	2500	NA	NA	1.8	1388.88888888889	4	1
211	143065126442039	3	2	52	5	5	6	4	59152	8	4	4	7	59	2	2	2	17	10	9	1	18	5	5	5	5	2	2	3	5	4	2	10	7	7	2	0	5	5	NA	NA	NA	NA	3500	NA	1.5	2333.33333333333	3	1
212	143065126457400	3	1	59	5	5	6	2	56066	2	2	5	4	56	6	3	2	6	5	5	7	25	8	7	8	NA	NA	NA	8	8	NA	2	6	5	4	2	0	2	2	NA	1040	NA	NA	NA	NA	1.5	693.333333333333	6	1
213	143065126526014	3	2	61	5	5	7	4	60057	6	3	1	10	60	4	2	2	19	10	9	1	20	5	5	5	3	1	NA	2	2	2	2	10	7	7	2	0	4	4	NA	NA	NA	2500	NA	NA	1.5	1666.66666666667	4	1
214	143065126815809	3	1	21	2	2	3	1	21540	8	4	3	5	21	4	2	2	5	4	4	1	15	4	4	4	3	1	NA	2	2	2	2	11	8	8	3	0	3	3	NA	NA	1600	NA	NA	NA	2	800	6	2
215	143065126988873	3	1	34	3	3	4	1	66024	3	2	5	5	66	9	5	2	13	9	8	2	18	5	5	5	4	2	NA	5	7	5	1	10	1	7	1	NA	2	2	NA	1200	NA	NA	NA	NA	1	1200	5	2
216	143065127111759	3	1	23	2	2	3	1	93029	9	5	4	10	93	1	1	1	12	8	7	5	NA	9	8	8	NA	NA	NA	6	8	NA	1	8	1	5	4	0	7	7	NA	NA	NA	NA	NA	NA	NA	NA	NA	4
217	143065127141462	3	2	57	5	5	6	4	60680	1	1	6	1	60	4	2	2	19	10	9	3	12	7	7	7	NA	NA	NA	7	8	NA	2	10	7	7	2	0	5	5	NA	NA	NA	NA	3200	NA	1.5	2133.33333333333	3	1
218	143065127284826	3	2	76	7	6	8	4	94080	9	5	2	9	94	1	1	1	12	8	7	3	5	7	7	7	NA	NA	NA	7	8	NA	2	11	8	8	1	NA	4	4	NA	NA	NA	2650	NA	NA	1	2650	2	3
219	143065127653477	3	1	48	4	4	5	2	57464	1	1	6	1	57	3	2	2	15	1	1	1	21	5	5	5	3	1	NA	2	2	2	2	10	7	7	4	1	6	6	NA	NA	NA	NA	NA	4800	2.3	2086.95652173913	3	1
220	143065127792747	3	2	74	6	6	8	4	33009	6	3	3	7	33	7	4	2	2	2	2	3	6	7	7	7	NA	NA	NA	7	8	NA	2	11	8	8	2	0	7	7	NA	NA	NA	NA	NA	NA	NA	NA	NA	1
221	143065127820401	3	1	41	4	4	5	2	35047	8	4	3	7	35	6	3	2	6	5	5	7	30	10	7	8	NA	NA	NA	8	8	NA	2	9	6	6	1	NA	2	2	NA	1431	NA	NA	NA	NA	1	1431	4	3
222	143065127824499	3	1	53	5	5	6	2	22050	5	3	1	7	22	6	3	2	6	5	5	1	24	6	6	6	3	1	NA	2	2	2	1	7	1	4	4	0	5	5	NA	NA	NA	NA	3100	NA	2.5	1240	5	1
223	143065127858303	3	1	24	2	2	3	1	85144	1	1	6	2	85	6	3	2	18	12	11	1	24	6	6	6	3	1	NA	2	2	2	2	10	7	7	2	0	5	5	NA	NA	NA	NA	3100	NA	1.5	2066.66666666667	3	1
224	143065128313863	3	2	22	2	2	3	3	75115	9	5	1	11	75	1	1	1	12	8	7	1	20	5	5	5	3	1	NA	2	2	2	1	11	1	8	4	0	7	7	NA	NA	NA	NA	NA	NA	NA	NA	NA	2
225	143065128348682	3	2	46	4	4	5	4	56176	5	3	3	5	56	6	3	2	6	5	5	2	21	5	5	5	3	1	NA	5	7	5	2	9	6	6	3	0	7	7	NA	NA	NA	NA	NA	NA	NA	NA	NA	3
226	143065128722448	3	1	66	6	6	7	2	50532	5	3	3	4	50	5	3	2	4	11	10	3	9	7	7	7	NA	NA	NA	7	8	NA	2	11	8	8	2	0	5	5	NA	NA	NA	NA	3900	NA	1.5	2600	2	1
227	143065128725522	3	2	31	3	3	4	3	53147	4	2	1	7	53	6	3	2	18	12	11	1	23	6	6	6	9	1	NA	2	2	2	2	9	6	6	3	1	5	5	NA	NA	NA	NA	3100	NA	1.8	1722.22222222222	4	1
228	143065129078818	3	2	76	7	6	8	4	17415	5	3	1	8	17	6	3	2	20	2	2	3	6	7	7	7	NA	NA	NA	7	8	NA	2	11	8	8	1	NA	3	3	NA	NA	1900	NA	NA	NA	1	1900	3	3
229	143065129346089	3	1	38	4	4	4	2	16015	7	4	1	9	16	6	3	2	20	2	2	1	21	5	5	5	9	1	NA	2	2	2	2	8	6	5	4	2	7	7	NA	NA	NA	NA	NA	NA	NA	NA	NA	1
230	143065129351212	3	1	79	7	6	8	2	80554	1	1	6	1	80	4	2	2	19	10	9	3	5	7	7	7	NA	NA	NA	7	8	NA	2	11	8	8	3	0	5	5	NA	NA	NA	NA	3950	NA	2	1975	3	1
231	143065129776177	3	1	75	7	6	8	2	69383	8	4	1	11	69	8	5	2	22	3	3	3	9	7	7	7	NA	NA	NA	7	8	NA	2	8	6	5	2	0	5	5	NA	NA	NA	NA	3300	NA	1.5	2200	3	1
232	143065129824306	3	2	58	5	5	6	4	29204	1	1	6	3	29	6	3	2	6	5	5	1	24	6	6	6	3	1	NA	2	2	2	2	7	5	4	2	0	3	3	NA	NA	1990	NA	NA	NA	1.5	1326.66666666667	4	3
233	143065130352702	3	2	36	4	4	4	4	79157	1	1	6	2	79	6	3	2	20	2	2	1	5	3	3	3	3	1	NA	2	2	2	2	11	8	8	1	NA	4	4	NA	NA	NA	2500	NA	NA	1	2500	2	4
234	143065130485835	3	1	31	3	3	4	1	25612	1	1	6	1	25	3	2	2	10	4	4	1	10	3	3	3	3	1	NA	2	2	2	2	11	8	8	2	0	7	7	NA	NA	NA	NA	NA	NA	NA	NA	NA	4
235	143065130510418	3	2	77	7	6	8	4	95229	9	5	3	6	95	1	1	1	12	8	7	3	9	7	7	7	NA	NA	NA	7	8	NA	2	6	5	4	1	NA	4	4	NA	NA	NA	2100	NA	NA	1	2100	3	4
236	143065130784865	3	2	21	2	2	3	3	14047	4	2	1	7	14	5	3	2	4	11	10	5	NA	9	8	8	NA	NA	NA	6	8	NA	1	8	1	5	1	NA	1	1	400	NA	NA	NA	NA	NA	1	400	6	4
237	143065130800229	3	2	54	5	5	6	4	83071	4	2	5	7	83	9	5	2	21	13	12	1	4	2	2	2	1	3	NA	1	1	1	2	11	8	8	3	1	5	5	NA	NA	NA	NA	3600	NA	1.8	2000	3	3
238	143065130810473	3	2	61	5	5	7	4	29198	1	1	6	2	29	6	3	2	6	5	5	7	2	7	7	8	NA	NA	NA	8	8	NA	2	3	2	1	3	0	3	3	NA	NA	1960	NA	NA	NA	2	980	5	1
239	143065130826860	3	2	57	5	5	6	4	59183	7	4	1	10	59	2	2	2	17	10	9	7	18	8	7	8	NA	NA	NA	8	8	NA	2	5	4	3	2	0	5	5	NA	NA	NA	NA	3500	NA	1.5	2333.33333333333	3	1
240	143065131038836	3	2	75	7	6	8	4	85120	1	1	6	2	85	6	3	2	18	12	11	3	20	8	7	7	NA	NA	NA	7	8	NA	2	10	7	7	2	0	7	7	NA	NA	NA	NA	NA	NA	NA	NA	NA	1
241	143065131039862	3	2	39	4	4	4	4	30006	3	2	5	5	30	9	5	2	13	9	8	1	14	4	4	4	5	2	2	3	5	4	2	10	7	7	5	3	6	6	NA	NA	NA	NA	NA	5000	2.4	2083.33333333333	3	1
242	143065131070585	3	2	29	3	3	3	3	92036	9	5	4	9	92	1	1	1	12	8	7	1	7	3	3	3	7	2	3	3	4	4	1	11	1	8	2	0	6	6	NA	NA	NA	NA	NA	4500	1.5	3000	2	1
243	143065131162750	3	1	30	3	3	4	1	71059	5	3	3	4	71	4	2	2	5	4	4	1	17	4	4	4	3	1	NA	2	2	2	2	10	7	7	2	0	5	5	NA	NA	NA	NA	3200	NA	1.5	2133.33333333333	3	1
244	143065131189249	3	2	33	3	3	4	3	19031	6	3	1	9	19	7	4	2	14	2	2	2	3	2	2	2	1	3	NA	5	7	5	2	10	7	7	2	1	1	1	400	NA	NA	NA	NA	NA	1.3	307.692307692308	6	2
245	143065131194371	3	2	67	6	6	7	4	92020	9	5	2	9	92	1	1	1	12	8	7	3	16	7	7	7	NA	NA	NA	7	8	NA	2	9	6	6	1	NA	3	3	NA	NA	1999	NA	NA	NA	1	1999	3	3
246	143065131410439	3	1	22	2	2	3	1	69387	8	4	1	11	69	8	5	2	22	3	3	5	NA	9	8	8	NA	NA	NA	6	8	NA	1	10	1	7	3	0	3	3	NA	NA	1900	NA	NA	NA	2	950	5	3
247	143065131415564	3	2	44	4	4	5	4	62119	8	4	1	8	62	2	2	2	17	10	9	2	21	5	5	5	3	1	NA	5	7	5	2	10	7	7	5	2	5	5	NA	NA	NA	NA	3200	NA	2.6	1230.76923076923	5	1
248	143065131430928	3	1	68	6	6	7	2	94046	9	5	2	10	94	1	1	1	12	8	7	3	28	8	7	7	NA	NA	NA	7	8	NA	2	2	2	1	1	NA	1	1	300	NA	NA	NA	NA	NA	1	300	6	3
249	143065131432977	3	2	34	3	3	4	3	22048	1	1	6	3	22	6	3	2	6	5	5	2	20	5	5	5	3	1	NA	5	7	5	2	9	6	6	3	1	3	3	NA	NA	1700	NA	NA	NA	1.8	944.444444444444	5	1
250	143065131688990	3	1	61	5	5	7	2	62160	6	3	1	9	62	2	2	2	17	10	9	2	26	6	6	6	3	1	NA	5	7	5	2	6	5	4	1	NA	1	1	500	NA	NA	NA	NA	NA	1	500	6	4
251	143065132313684	3	2	65	6	6	7	4	71306	5	3	1	7	71	4	2	2	5	4	4	3	24	8	7	7	NA	NA	NA	7	8	NA	2	4	3	2	1	NA	2	2	NA	1400	NA	NA	NA	NA	1	1400	4	3
252	143065132633179	3	2	88	7	6	8	4	69034	8	4	2	9	69	8	5	2	22	3	3	3	22	8	7	7	NA	NA	NA	7	8	NA	2	2	2	1	1	NA	7	7	NA	NA	NA	NA	NA	NA	NA	NA	NA	3
253	143065133513834	3	1	27	3	3	3	1	85064	1	1	6	3	85	6	3	2	18	12	11	1	24	6	6	6	3	1	NA	2	2	2	2	9	6	6	4	2	4	4	NA	NA	NA	2400	NA	NA	2.1	1142.85714285714	5	1
254	143065133711469	3	2	55	5	5	6	4	12100	4	2	3	3	12	7	4	2	16	9	8	1	20	5	5	5	3	1	NA	2	2	2	2	8	6	5	2	0	5	5	NA	NA	NA	NA	3900	NA	1.5	2600	2	1
255	143065134287990	3	1	22	2	2	3	1	33063	8	4	1	11	33	7	4	2	2	2	2	5	NA	9	8	8	NA	NA	NA	6	8	NA	1	10	1	7	1	NA	1	1	800	NA	NA	NA	NA	NA	1	800	6	3
256	143065134878724	3	2	30	3	3	4	3	91235	9	5	4	7	91	1	1	1	12	8	7	1	12	4	4	4	7	2	1	3	5	4	1	2	1	1	5	3	3	3	NA	NA	1800	NA	NA	NA	2.4	750	6	1
257	143065136336938	3	1	32	3	3	4	1	94069	9	5	2	7	94	1	1	1	12	8	7	1	25	6	6	6	6	2	2	3	5	4	2	8	6	5	1	NA	7	7	NA	NA	NA	NA	NA	NA	NA	NA	NA	4
258	143065136770102	3	1	35	4	4	4	2	22327	1	1	6	2	22	6	3	2	6	5	5	1	20	5	5	5	3	1	NA	2	2	2	2	8	6	5	3	1	4	4	NA	NA	NA	2800	NA	NA	1.8	1555.55555555556	4	1
259	143065136917562	3	1	35	4	4	4	2	67317	1	1	6	1	67	3	2	2	1	1	1	1	10	3	3	3	3	1	NA	2	2	2	2	11	8	8	4	2	5	5	NA	NA	NA	NA	3900	NA	2.1	1857.14285714286	4	1
260	143065138288732	3	1	45	4	4	5	2	35040	2	2	5	4	35	6	3	2	6	5	5	1	16	4	4	4	7	2	3	3	4	4	2	10	7	7	4	2	7	7	NA	NA	NA	NA	NA	NA	NA	NA	NA	1
261	143065138640994	3	2	37	4	4	4	4	43165	1	1	6	2	43	8	5	2	3	3	3	6	28	8	7	8	NA	NA	NA	8	8	NA	2	5	4	3	4	2	4	4	NA	NA	NA	2900	NA	NA	2.1	1380.95238095238	4	1
262	143065138863207	3	2	37	4	4	4	4	53046	1	1	6	1	53	6	3	2	18	12	11	2	20	5	5	5	3	1	NA	5	7	5	2	6	5	4	3	1	4	4	NA	NA	NA	2100	NA	NA	1.8	1166.66666666667	5	1
263	143065138921587	3	2	21	2	2	3	3	42218	8	4	1	11	42	8	5	2	22	3	3	5	NA	9	8	8	NA	NA	NA	6	8	NA	1	8	1	5	3	1	7	7	NA	NA	NA	NA	NA	NA	NA	NA	NA	1
264	143065139215387	3	1	78	7	6	8	2	77445	9	5	3	9	77	1	1	1	12	8	7	3	14	7	7	7	NA	NA	NA	7	8	NA	2	10	7	7	3	0	5	5	NA	NA	NA	NA	3550	NA	2	1775	4	1
265	143065140323398	3	1	28	3	3	3	1	75112	9	5	1	11	75	1	1	1	12	8	7	1	28	6	6	6	6	2	2	3	5	4	2	9	6	6	2	0	5	5	NA	NA	NA	NA	3600	NA	1.5	2400	3	2
266	143065141501033	3	1	21	2	2	3	1	89387	5	3	1	8	89	4	2	2	5	4	4	1	24	6	6	6	9	1	NA	2	2	2	1	6	1	4	1	NA	1	1	900	NA	NA	NA	NA	NA	1	900	5	4
267	143065142544391	3	1	76	7	6	8	2	54329	5	3	1	7	54	3	2	2	15	1	1	3	9	7	7	7	NA	NA	NA	7	8	NA	2	8	6	5	2	0	4	4	NA	NA	NA	2950	NA	NA	1.5	1966.66666666667	3	1
268	143065143664722	3	1	21	2	2	3	1	76498	8	4	4	8	76	5	3	2	11	11	10	5	NA	9	8	8	NA	NA	NA	6	8	NA	1	8	1	5	1	NA	1	1	400	NA	NA	NA	NA	NA	1	400	6	4
269	143065143807060	3	2	53	5	5	6	4	77135	1	1	6	2	77	1	1	1	12	8	7	1	11	4	4	4	3	1	NA	2	2	2	2	10	7	7	3	0	7	7	NA	NA	NA	NA	NA	NA	NA	NA	NA	1
270	143065145333768	3	1	21	2	2	3	1	80545	1	1	6	1	80	4	2	2	19	10	9	5	NA	9	8	8	NA	NA	NA	6	8	NA	1	10	1	7	4	0	6	6	NA	NA	NA	NA	NA	4300	2.5	1720	4	4
271	143065145416737	3	1	19	2	2	2	1	34172	8	4	1	11	34	9	5	2	13	9	8	5	NA	9	8	8	NA	NA	NA	6	8	NA	1	8	1	5	1	NA	7	7	NA	NA	NA	NA	NA	NA	NA	NA	NA	2
272	143065145452587	3	2	36	4	4	4	4	35360	4	2	5	7	35	6	3	2	6	5	5	1	27	6	6	6	3	1	NA	2	2	2	2	5	4	3	4	1	4	4	NA	NA	NA	2990	NA	NA	2.3	1300	5	1
273	143065145466926	3	2	29	3	3	3	3	40122	1	1	6	1	40	7	4	2	2	2	2	2	15	4	4	4	3	1	NA	5	7	5	2	9	6	6	3	1	4	4	NA	NA	NA	2600	NA	NA	1.8	1444.44444444444	4	1
274	143065145710694	3	2	34	3	3	4	3	2691	6	3	1	10	2	4	2	2	19	10	9	1	2	2	2	2	1	3	NA	1	1	1	1	8	1	5	5	3	4	4	NA	NA	NA	2500	NA	NA	2.4	1041.66666666667	5	1
275	143065145799791	3	1	21	2	2	3	1	86194	7	4	1	10	86	6	3	2	20	2	2	5	NA	9	8	8	NA	NA	NA	6	8	NA	1	10	1	7	2	0	7	7	NA	NA	NA	NA	NA	NA	NA	NA	NA	2
276	143065145941018	3	2	20	2	2	3	3	75112	9	5	1	11	75	1	1	1	12	8	7	5	NA	9	8	8	NA	NA	NA	6	8	NA	1	8	1	5	4	0	6	6	NA	NA	NA	NA	NA	7000	2.5	2800	2	2
277	143065146000429	3	1	19	2	2	2	1	93001	9	5	4	10	93	1	1	1	12	8	7	5	NA	9	8	8	NA	NA	NA	6	8	NA	1	8	1	5	1	NA	2	2	NA	1499	NA	NA	NA	NA	1	1499	4	4
278	143065146297436	3	1	64	5	5	7	2	88447	5	3	1	3	88	3	2	2	15	1	1	3	19	8	7	7	NA	NA	NA	7	8	NA	2	10	7	7	2	0	6	6	NA	NA	NA	NA	NA	5000	1.5	3333.33333333333	1	1
279	143065146325090	3	1	33	3	3	4	1	52444	1	1	6	1	52	4	2	2	8	1	1	1	24	6	6	6	3	1	NA	2	2	2	2	9	6	6	3	1	7	7	NA	NA	NA	NA	NA	NA	NA	NA	NA	1
280	143065146462208	3	1	52	5	5	6	2	37050	8	4	3	7	37	5	3	2	7	6	6	1	9	3	3	3	4	2	NA	2	3	3	2	11	8	8	2	0	5	5	NA	NA	NA	NA	3900	NA	1.5	2600	2	1
281	143065146638382	3	2	35	4	4	4	4	25101	1	1	6	1	25	3	2	2	10	4	4	1	20	5	5	5	3	1	NA	2	2	2	2	10	7	7	3	1	4	4	NA	NA	NA	2900	NA	NA	1.8	1611.11111111111	4	1
282	143065146665014	3	1	32	3	3	4	1	89024	5	3	1	9	89	4	2	2	5	4	4	2	30	10	8	8	10	5	NA	5	7	NA	2	6	5	4	1	NA	1	1	600	NA	NA	NA	NA	NA	1	600	6	3
283	143065146716224	3	2	70	6	6	8	4	92012	9	5	2	11	92	1	1	1	12	8	7	3	7	7	7	7	NA	NA	NA	7	8	NA	2	11	8	8	2	0	6	6	NA	NA	NA	NA	NA	5000	1.5	3333.33333333333	1	1
284	143065146907749	3	1	25	3	3	3	1	49373	3	2	5	5	49	6	3	2	18	12	11	1	23	6	6	6	3	1	NA	2	2	2	2	10	7	7	3	1	7	7	NA	NA	NA	NA	NA	NA	NA	NA	NA	1
285	143065146983543	3	2	66	6	6	7	4	29206	1	1	6	3	29	6	3	2	6	5	5	3	1	7	7	7	NA	NA	NA	7	8	NA	2	7	5	4	2	0	4	4	NA	NA	NA	2250	NA	NA	1.5	1500	4	1
286	143065146987640	3	2	35	4	4	4	4	79034	6	3	2	2	79	6	3	2	20	2	2	1	21	5	5	5	9	1	NA	2	2	2	2	2	2	1	6	4	3	3	NA	NA	1700	NA	NA	NA	2.7	629.62962962963	6	1
287	143065148388475	3	2	40	4	4	5	4	41091	1	1	6	2	41	5	3	2	7	6	6	6	22	8	7	8	NA	NA	NA	8	8	NA	2	5	4	3	6	2	3	3	NA	NA	1680	NA	NA	NA	3.1	541.935483870968	6	1
288	143065149278299	3	1	18	2	2	2	1	34129	8	4	3	7	34	9	5	2	13	9	8	5	NA	9	8	8	NA	NA	NA	6	8	NA	1	8	1	5	4	0	6	6	NA	NA	NA	NA	NA	4500	2.5	1800	4	4
289	143065149662234	3	2	31	3	3	4	3	87085	7	4	1	11	87	7	4	2	14	2	2	2	21	5	5	5	3	1	NA	5	7	5	2	10	7	7	1	NA	1	1	300	NA	NA	NA	NA	NA	1	300	6	3
290	143065150990432	3	2	33	3	3	4	3	26333	3	2	1	4	26	8	5	2	22	3	3	1	4	2	2	2	1	3	NA	1	1	1	2	10	7	7	2	0	5	5	NA	NA	NA	NA	3500	NA	1.5	2333.33333333333	3	1
291	143065151252510	3	1	30	3	3	4	1	28012	1	1	6	4	28	5	3	2	7	6	6	1	18	5	5	5	3	1	NA	2	2	2	2	7	5	4	2	0	2	2	NA	1300	NA	NA	NA	NA	1.5	866.666666666667	6	1
292	143065151282216	3	2	24	2	2	3	3	45234	8	4	1	11	45	5	3	2	7	6	6	1	15	4	4	4	3	1	NA	2	2	2	1	11	1	8	3	1	5	5	NA	NA	NA	NA	3500	NA	1.8	1944.44444444444	3	1
293	143065151545428	3	2	34	3	3	4	3	79191	6	3	1	10	79	6	3	2	20	2	2	6	24	8	7	8	NA	NA	NA	8	8	NA	2	2	2	1	5	3	2	2	NA	1400	NA	NA	NA	NA	2.4	583.333333333333	6	1
294	143065152437370	3	2	32	3	3	4	3	73003	2	2	1	4	73	8	5	2	22	3	3	1	18	5	5	5	6	2	2	3	5	4	2	10	7	7	2	0	4	4	NA	NA	NA	2900	NA	NA	1.5	1933.33333333333	3	1
295	143065152792649	3	2	48	4	4	5	4	49069	4	2	5	7	49	6	3	2	18	12	11	6	15	7	7	8	NA	NA	NA	8	8	NA	2	11	8	8	2	0	7	7	NA	NA	NA	NA	NA	NA	NA	NA	NA	3
296	143065157383236	3	1	55	5	5	6	2	73065	7	4	1	10	73	8	5	2	22	3	3	1	23	6	6	6	3	1	NA	2	2	2	2	6	5	4	1	NA	4	4	NA	NA	NA	2100	NA	NA	1	2100	3	3
297	143065160630354	3	1	58	5	5	6	2	92040	9	5	2	10	92	1	1	1	12	8	7	1	10	3	3	3	3	1	NA	2	2	2	2	11	8	8	2	0	5	5	NA	NA	NA	NA	3990	NA	1.5	2660	2	1
298	143065161335834	3	1	20	2	2	3	1	94002	9	5	4	9	94	1	1	1	12	8	7	5	NA	9	8	8	NA	NA	NA	6	8	NA	1	8	1	5	5	1	7	7	NA	NA	NA	NA	NA	NA	NA	NA	NA	4
299	143065161590814	3	2	22	2	2	3	3	49007	8	4	1	11	49	6	3	2	18	12	11	1	15	4	4	4	3	1	NA	2	2	2	2	11	8	8	1	NA	2	2	NA	1250	NA	NA	NA	NA	1	1250	5	4
300	143065161627684	3	2	30	3	3	4	3	59183	7	4	1	10	59	2	2	2	17	10	9	4	NA	10	8	8	NA	NA	NA	5	8	5	2	7	5	4	2	0	1	1	900	NA	NA	NA	NA	NA	1.5	600	6	1
301	143065162743857	3	1	23	2	2	3	1	18197	4	2	1	6	18	5	3	2	7	6	6	1	21	5	5	5	3	1	NA	2	2	2	2	9	6	6	2	0	2	2	NA	1200	NA	NA	NA	NA	1.5	800	6	1
302	143065163647009	3	2	23	2	2	3	3	67348	4	2	1	7	67	3	2	2	1	1	1	1	20	5	5	5	3	1	NA	2	2	2	2	10	7	7	2	0	5	5	NA	NA	NA	NA	3500	NA	1.5	2333.33333333333	3	1
303	143065166138380	3	2	25	3	3	3	3	55123	1	1	6	1	55	3	2	2	15	1	1	2	11	4	4	4	9	1	NA	5	7	5	2	6	5	4	2	0	3	3	NA	NA	1555	NA	NA	NA	1.5	1036.66666666667	5	2
304	143065166138381	3	2	20	2	2	3	3	38185	8	4	1	11	38	8	5	2	22	3	3	5	NA	9	8	8	NA	NA	NA	6	8	NA	1	11	1	8	1	NA	1	1	500	NA	NA	NA	NA	NA	1	500	6	2
305	143065166988397	3	2	44	4	4	5	4	69282	8	4	3	9	69	8	5	2	22	3	3	1	14	4	4	4	6	2	2	3	5	4	2	10	7	7	2	0	4	4	NA	NA	NA	2200	NA	NA	1.5	1466.66666666667	4	2
306	143065167509595	3	1	19	2	2	2	1	75109	9	5	1	11	75	1	1	1	12	8	7	1	21	5	5	5	3	1	NA	2	2	2	1	8	1	5	2	0	4	4	NA	NA	NA	2999	NA	NA	1.5	1999.33333333333	3	4
307	143065167543411	3	2	67	6	6	7	4	45200	1	1	6	2	45	5	3	2	7	6	6	3	15	7	7	7	NA	NA	NA	7	8	NA	2	5	4	3	2	0	4	4	NA	NA	NA	2250	NA	NA	1.5	1500	4	1
308	143065168181251	3	1	22	2	2	3	1	87085	7	4	1	11	87	7	4	2	14	2	2	5	NA	9	8	8	NA	NA	NA	6	8	NA	1	11	1	8	1	NA	1	1	333	NA	NA	NA	NA	NA	1	333	6	2
309	143065169125378	3	2	38	4	4	4	4	49092	5	3	5	8	49	6	3	2	18	12	11	1	20	5	5	5	3	1	NA	2	2	2	2	10	7	7	2	0	4	4	NA	NA	NA	2750	NA	NA	1.5	1833.33333333333	4	1
310	143065169946631	3	2	58	5	5	6	4	92025	9	5	3	10	92	1	1	1	12	8	7	1	17	4	4	4	3	1	NA	2	2	2	2	10	7	7	1	NA	4	4	NA	NA	NA	2800	NA	NA	1	2800	2	4
311	143065170605158	3	2	53	5	5	6	4	71065	1	1	6	1	71	4	2	2	5	4	4	1	2	2	2	2	1	3	NA	1	1	1	2	9	6	6	3	0	1	1	995	NA	NA	NA	NA	NA	2	497.5	6	3
312	143065171145850	3	2	56	5	5	6	4	74070	3	2	1	3	74	8	5	2	22	3	3	1	18	5	5	5	6	2	2	3	5	4	2	7	5	4	2	0	4	4	NA	NA	NA	2400	NA	NA	1.5	1600	4	1
313	143065172206660	3	2	58	5	5	6	4	35224	1	1	6	3	35	6	3	2	6	5	5	1	22	5	5	5	9	1	NA	2	2	2	2	6	5	4	2	0	3	3	NA	NA	1800	NA	NA	NA	1.5	1200	5	1
314	143065173391388	3	1	38	4	4	4	2	5101	1	1	6	2	5	9	5	2	21	13	12	2	30	10	8	8	3	1	NA	5	7	5	2	2	2	1	3	0	3	3	NA	NA	1700	NA	NA	NA	2	850	6	2
315	143065173423145	3	2	40	4	4	5	4	81175	1	1	6	1	81	7	4	2	16	9	8	1	20	5	5	5	3	1	NA	2	2	2	2	10	7	7	3	1	4	4	NA	NA	NA	2500	NA	NA	1.8	1388.88888888889	4	1
316	143065173824600	3	1	43	4	4	5	2	77131	5	3	1	7	77	1	1	1	12	8	7	1	6	3	3	3	4	2	NA	2	3	3	1	9	1	6	5	0	6	6	NA	NA	NA	NA	NA	4600	3	1533.33333333333	4	1
317	143065174295643	3	1	24	2	2	3	1	2694	1	1	6	1	2	4	2	2	19	10	9	1	24	6	6	6	3	1	NA	2	2	2	2	10	7	7	2	0	7	7	NA	NA	NA	NA	NA	NA	NA	NA	NA	1
318	143065174752345	3	2	22	2	2	3	3	64102	8	4	1	10	64	7	4	2	2	2	2	1	15	4	4	4	3	1	NA	2	2	2	1	11	1	8	2	0	4	4	NA	NA	NA	2800	NA	NA	1.5	1866.66666666667	3	1
319	143065175323668	3	2	45	4	4	5	4	13063	8	4	4	8	13	9	5	2	21	13	12	2	21	5	5	5	9	1	NA	5	7	5	2	6	5	4	2	0	5	5	NA	NA	NA	NA	3600	NA	1.5	2400	3	1
320	143065175531520	3	2	61	5	5	7	4	33055	1	1	6	1	33	7	4	2	2	2	2	7	15	7	7	8	NA	NA	NA	8	8	NA	2	6	5	4	2	0	3	3	NA	NA	1600	NA	NA	NA	1.5	1066.66666666667	5	1
321	143065175711869	3	1	26	3	3	3	1	76373	1	1	6	1	76	5	3	2	11	11	10	1	23	6	6	6	3	1	NA	2	2	2	2	8	6	5	2	0	4	4	NA	NA	NA	2600	NA	NA	1.5	1733.33333333333	4	1
322	143065176207421	3	2	42	4	4	5	4	50605	1	1	6	12	50	5	3	2	4	11	10	1	12	4	4	4	5	2	2	3	5	4	2	10	7	7	5	2	7	7	NA	NA	NA	NA	NA	NA	NA	NA	NA	1
323	143065177377812	3	1	22	2	2	3	1	44088	1	1	6	3	44	6	3	2	18	12	11	2	23	6	6	6	3	1	NA	5	7	5	2	8	6	5	1	NA	2	2	NA	1200	NA	NA	NA	NA	1	1200	5	4
324	143065178867749	3	2	33	3	3	4	3	69056	4	2	2	3	69	8	5	2	22	3	3	1	18	5	5	5	5	2	2	3	5	4	2	10	7	7	3	1	4	4	NA	NA	NA	2980	NA	NA	1.8	1655.55555555556	4	1
325	143065178869802	3	1	46	4	4	5	2	89186	1	1	6	1	89	4	2	2	5	4	4	1	24	6	6	6	3	1	NA	2	2	2	2	8	6	5	4	1	3	3	NA	NA	1900	NA	NA	NA	2.3	826.086956521739	6	1
326	143065179400245	3	2	32	3	3	4	3	84076	1	1	6	2	84	9	5	2	21	13	12	1	21	5	5	5	3	1	NA	2	2	2	2	8	6	5	5	3	5	5	NA	NA	NA	NA	3500	NA	2.4	1458.33333333333	4	1
327	143065180515355	3	2	56	5	5	6	4	19031	6	3	1	9	19	7	4	2	14	2	2	2	26	6	6	6	3	1	NA	5	7	5	2	9	6	6	3	0	7	7	NA	NA	NA	NA	NA	NA	NA	NA	NA	4
328	143065180812409	3	1	26	3	3	3	1	94017	9	5	4	10	94	1	1	1	12	8	7	1	23	6	6	6	3	1	NA	2	2	2	2	9	6	6	2	0	2	2	NA	1490	NA	NA	NA	NA	1.5	993.333333333333	5	1
329	143065180939292	3	2	35	4	4	4	4	38114	1	1	6	2	38	8	5	2	22	3	3	1	22	5	5	5	9	1	NA	2	2	2	2	8	6	5	4	2	4	4	NA	NA	NA	2200	NA	NA	2.1	1047.61904761905	5	1
330	143065180951594	3	2	22	2	2	3	3	59271	7	4	4	8	59	2	2	2	17	10	9	2	27	6	6	6	3	1	NA	5	7	5	2	9	6	6	4	0	3	3	NA	NA	1600	NA	NA	NA	2.5	640	6	3
331	143065180981329	3	1	64	5	5	7	2	59144	5	3	3	1	59	2	2	2	17	10	9	3	2	7	7	7	NA	NA	NA	7	8	NA	2	8	6	5	3	0	5	5	NA	NA	NA	NA	3450	NA	2	1725	4	1
332	143065180992600	3	2	32	3	3	4	3	31303	1	1	6	3	31	7	4	2	16	9	8	1	18	5	5	5	7	2	2	3	5	4	2	10	7	7	5	3	5	5	NA	NA	NA	NA	3100	NA	2.4	1291.66666666667	5	1
333	143065181021194	3	2	40	4	4	5	4	64422	4	2	1	7	64	7	4	2	2	2	2	1	3	2	2	2	1	3	NA	1	1	1	2	10	7	7	2	0	3	3	NA	NA	1800	NA	NA	NA	1.5	1200	5	2
334	143065181030424	3	1	19	2	2	2	1	31169	8	4	2	5	31	7	4	2	16	9	8	1	21	5	5	5	4	2	NA	2	3	3	2	3	2	1	3	0	5	5	NA	NA	NA	NA	3600	NA	2	1800	4	2
335	143065181032479	3	2	22	2	2	3	3	92063	9	5	2	10	92	1	1	1	12	8	7	5	NA	9	8	8	NA	NA	NA	6	8	NA	1	11	1	8	2	0	3	3	NA	NA	1800	NA	NA	NA	1.5	1200	5	1
336	143065181081709	3	2	65	6	6	7	4	59263	1	1	6	2	59	2	2	2	17	10	9	3	12	7	7	7	NA	NA	NA	7	8	NA	2	8	6	5	3	1	2	2	NA	1499	NA	NA	NA	NA	1.8	832.777777777778	6	3
337	143065181116450	3	1	42	4	4	5	2	93063	9	5	4	8	93	1	1	1	12	8	7	1	24	6	6	6	3	1	NA	2	2	2	2	9	6	6	1	NA	4	4	NA	NA	NA	2000	NA	NA	1	2000	3	4
338	143065181117481	3	2	36	4	4	4	4	61116	1	1	6	3	61	5	3	2	4	11	10	1	14	4	4	4	7	2	3	3	4	4	2	8	6	5	2	0	4	4	NA	NA	NA	2900	NA	NA	1.5	1933.33333333333	3	1
339	143065181120565	3	1	44	4	4	5	2	60284	1	1	6	2	60	4	2	2	19	10	9	1	1	1	1	1	1	3	NA	1	1	1	2	10	7	7	3	1	5	5	NA	NA	NA	NA	3999	NA	1.8	2221.66666666667	3	1
340	143065181123647	3	2	50	5	5	6	4	9225	5	3	1	7	9	7	4	2	16	9	8	6	27	8	7	8	NA	NA	NA	8	8	NA	2	3	2	1	2	0	1	1	900	NA	NA	NA	NA	NA	1.5	600	6	1
341	143065181124676	3	2	35	4	4	4	4	27605	1	1	6	1	27	5	3	2	11	11	10	2	22	5	5	5	9	1	NA	5	7	5	2	8	6	5	5	3	4	4	NA	NA	NA	2800	NA	NA	2.4	1166.66666666667	5	1
342	143065181126731	3	2	25	3	3	3	3	27229	6	3	1	9	27	5	3	2	11	11	10	2	23	6	6	6	3	1	NA	5	7	5	2	6	5	4	4	2	5	5	NA	NA	NA	NA	3500	NA	2.1	1666.66666666667	4	1
343	143065181128791	3	2	31	3	3	4	3	69143	8	4	3	5	69	8	5	2	22	3	3	1	15	4	4	4	3	1	NA	2	2	2	2	11	8	8	2	0	5	5	NA	NA	NA	NA	3200	NA	1.5	2133.33333333333	3	1
344	143065181151255	3	1	20	2	2	3	1	42218	8	4	1	11	42	8	5	2	22	3	3	5	NA	9	8	8	NA	NA	NA	6	8	NA	1	5	1	3	7	3	6	6	NA	NA	NA	NA	NA	5600	3.4	1647.05882352941	4	3
345	143065181154342	3	1	37	4	4	4	2	70027	1	1	6	1	70	3	2	2	10	4	4	1	23	6	6	6	3	1	NA	2	2	2	2	7	5	4	6	3	6	6	NA	NA	NA	NA	NA	4600	2.9	1586.20689655172	4	1
346	143065181169761	3	1	19	2	2	2	1	94016	9	5	3	9	94	1	1	1	12	8	7	5	NA	9	8	8	NA	NA	NA	6	8	NA	1	11	1	8	1	NA	7	7	NA	NA	NA	NA	NA	NA	NA	NA	NA	4
347	143065181190166	3	1	77	7	6	8	2	56015	1	1	6	2	56	6	3	2	6	5	5	3	12	7	7	7	NA	NA	NA	7	8	NA	2	10	7	7	1	NA	4	4	NA	NA	NA	2200	NA	NA	1	2200	3	3
348	143065181190168	3	1	71	6	6	8	2	40228	1	1	6	2	40	7	4	2	2	2	2	3	12	7	7	7	NA	NA	NA	7	8	NA	2	10	7	7	2	0	4	4	NA	NA	NA	2600	NA	NA	1.5	1733.33333333333	4	1
349	143065181197367	3	2	36	4	4	4	4	22304	1	1	6	1	22	6	3	2	6	5	5	1	20	5	5	5	8	2	NA	2	3	3	2	10	7	7	4	2	5	5	NA	NA	NA	NA	3600	NA	2.1	1714.28571428571	4	1
350	143065181205597	3	1	30	3	3	4	1	18147	1	1	6	1	18	5	3	2	7	6	6	1	28	6	6	6	3	1	NA	2	2	2	2	10	7	7	2	0	4	4	NA	NA	NA	2500	NA	NA	1.5	1666.66666666667	4	3
351	143065181207655	3	1	19	2	2	2	1	64445	7	4	1	10	64	7	4	2	2	2	2	2	21	5	5	5	3	1	NA	5	7	5	2	9	6	6	2	0	3	3	NA	NA	1658	NA	NA	NA	1.5	1105.33333333333	5	1
352	143065181219878	3	1	20	2	2	3	1	64445	7	4	1	10	64	7	4	2	2	2	2	2	26	6	6	6	3	1	NA	5	7	5	2	9	6	6	2	0	4	4	NA	NA	NA	2400	NA	NA	1.5	1600	4	2
353	143081854718983	3	1	55	5	5	6	2	67067	4	2	1	6	67	3	2	2	1	1	1	1	14	4	4	4	4	2	NA	2	3	3	2	8	6	5	3	0	4	4	NA	NA	NA	2900	NA	NA	2	1450	4	1
354	143081854865417	3	1	45	4	4	5	2	84080	8	4	4	7	84	9	5	2	21	13	12	1	23	6	6	6	3	1	NA	2	2	2	2	5	4	3	4	2	5	5	NA	NA	NA	NA	3800	NA	2.1	1809.52380952381	4	1
355	143081854903308	3	2	36	4	4	4	4	92040	9	5	2	10	92	1	1	1	12	8	7	1	14	4	4	4	5	2	2	3	5	4	2	11	8	8	2	0	6	6	NA	NA	NA	NA	NA	4600	1.5	3066.66666666667	2	1
356	143081854991378	3	1	36	4	4	4	2	75120	9	5	1	11	75	1	1	1	12	8	7	1	18	5	5	5	5	2	2	3	5	4	2	11	8	8	1	NA	4	4	NA	NA	NA	2431	NA	NA	1	2431	3	4
357	143081855042579	3	1	43	4	4	5	2	69208	5	3	2	3	69	8	5	2	22	3	3	1	10	3	3	3	3	1	NA	2	2	2	2	11	8	8	4	2	6	6	NA	NA	NA	NA	NA	7500	2.1	3571.42857142857	1	1
358	143081855159325	3	1	60	5	5	7	2	80021	7	4	1	11	80	4	2	2	19	10	9	7	24	8	7	8	NA	NA	NA	8	8	NA	2	6	5	4	2	0	2	2	NA	1140	NA	NA	NA	NA	1.5	760	6	1
359	143081855235106	3	1	55	5	5	6	2	94018	9	5	2	9	94	1	1	1	12	8	7	1	15	4	4	4	4	2	NA	2	3	3	2	6	5	4	2	0	2	2	NA	1100	NA	NA	NA	NA	1.5	733.333333333333	6	1
360	143081855332390	3	1	46	4	4	5	2	34301	6	3	1	9	34	9	5	2	13	9	8	1	20	5	5	5	3	1	NA	2	2	2	2	10	7	7	1	NA	3	3	NA	NA	1990	NA	NA	NA	1	1990	3	4
361	143081855333417	3	1	45	4	4	5	2	94058	9	5	2	9	94	1	1	1	12	8	7	1	10	3	3	3	3	1	NA	2	2	2	2	11	8	8	3	2	4	4	NA	NA	NA	2500	NA	NA	1.6	1562.5	4	2
362	143081855442992	3	1	75	7	6	8	2	34088	3	2	1	5	34	9	5	2	13	9	8	3	6	7	7	7	NA	NA	NA	7	8	NA	2	11	8	8	2	0	6	6	NA	NA	NA	NA	NA	4800	1.5	3200	1	1
363	143081855552563	3	1	78	7	6	8	2	75117	9	5	1	11	75	1	1	1	12	8	7	3	10	7	7	7	NA	NA	NA	7	8	NA	2	11	8	8	2	0	7	7	NA	NA	NA	NA	NA	NA	NA	NA	NA	1
364	143081855552564	3	1	74	6	6	8	2	75117	9	5	1	11	75	1	1	1	12	8	7	3	9	7	7	7	NA	NA	NA	7	8	NA	2	10	7	7	2	0	6	6	NA	NA	NA	NA	NA	6200	1.5	4133.33333333333	1	1
365	143081855609910	3	1	46	4	4	5	2	93048	9	5	4	11	93	1	1	1	12	8	7	1	23	6	6	6	4	2	NA	2	3	3	2	9	6	6	4	0	6	6	NA	NA	NA	NA	NA	4475	2.5	1790	4	1
366	143081855610935	3	1	60	5	5	7	2	13063	8	4	4	8	13	9	5	2	21	13	12	1	17	4	4	4	3	1	NA	2	2	2	2	10	7	7	2	0	4	4	NA	NA	NA	2700	NA	NA	1.5	1800	4	1
367	143081855710269	3	2	47	4	4	5	4	92063	9	5	2	10	92	1	1	1	12	8	7	1	6	3	3	3	5	2	2	3	5	4	2	11	8	8	4	2	6	6	NA	NA	NA	NA	NA	7500	2.1	3571.42857142857	1	1
368	143081855713342	3	1	40	4	4	5	2	91538	9	5	2	1	91	1	1	1	12	8	7	1	14	4	4	4	5	2	2	3	5	4	2	10	7	7	1	NA	3	3	NA	NA	1990	NA	NA	NA	1	1990	3	4
369	143081855945804	3	2	52	5	5	6	4	38465	1	1	6	2	38	8	5	2	22	3	3	1	9	3	3	3	3	1	NA	2	2	2	2	11	8	8	1	NA	5	5	NA	NA	NA	NA	3900	NA	1	3900	1	4
370	143081856036943	3	2	47	4	4	5	4	66136	8	4	1	11	66	9	5	2	13	9	8	6	30	10	7	8	NA	NA	NA	8	8	NA	2	6	5	4	4	2	2	2	NA	1250	NA	NA	NA	NA	2.1	595.238095238095	6	3
371	143081856037968	3	1	41	4	4	5	2	52448	5	3	1	8	51	4	2	2	8	1	1	1	6	3	3	3	5	2	2	3	5	4	2	11	8	8	3	1	5	5	NA	NA	NA	NA	3300	NA	1.8	1833.33333333333	4	1
372	143081856125012	3	1	56	5	5	6	2	49373	3	2	5	5	49	6	3	2	18	12	11	1	24	6	6	6	3	1	NA	2	2	2	2	6	5	4	2	0	5	5	NA	NA	NA	NA	3450	NA	1.5	2300	3	1
373	143081856125013	3	1	64	5	5	7	2	13002	8	4	2	8	13	9	5	2	21	13	12	1	3	2	2	2	1	3	NA	1	1	1	2	6	5	4	2	0	7	7	NA	NA	NA	NA	NA	NA	NA	NA	NA	1
374	143081856260193	3	2	49	4	4	5	4	87002	3	2	5	5	87	7	4	2	14	2	2	1	11	4	4	4	5	2	2	3	5	4	2	10	7	7	5	1	7	7	NA	NA	NA	NA	NA	NA	NA	NA	NA	1
375	143081856863345	3	1	74	6	6	8	2	77276	1	1	6	3	77	1	1	1	12	8	7	3	21	8	7	7	NA	NA	NA	7	8	NA	2	8	6	5	2	0	5	5	NA	NA	NA	NA	3800	NA	1.5	2533.33333333333	2	1
376	143081857086586	3	1	66	6	6	7	2	61001	5	3	1	8	61	5	3	2	4	11	10	3	16	7	7	7	NA	NA	NA	7	8	NA	2	8	6	5	2	0	3	3	NA	NA	1725	NA	NA	NA	1.5	1150	5	1
377	143081857702928	3	2	33	3	3	4	3	31555	8	4	1	11	31	7	4	2	16	9	8	1	10	3	3	3	3	1	NA	2	2	2	2	11	8	8	2	0	6	6	NA	NA	NA	NA	NA	4600	1.5	3066.66666666667	2	1
378	143081857873946	3	2	47	4	4	5	4	59291	7	4	4	7	59	2	2	2	17	10	9	1	14	4	4	4	6	2	2	3	5	4	2	10	7	7	3	0	4	4	NA	NA	NA	2990	NA	NA	2	1495	4	4
379	143081857873947	3	1	75	7	6	8	2	75114	9	5	1	11	75	1	1	1	12	8	7	3	9	7	7	7	NA	NA	NA	7	8	NA	2	11	8	8	2	0	6	6	NA	NA	NA	NA	NA	5200	1.5	3466.66666666667	1	1
380	143081857945632	3	1	58	5	5	6	2	13210	8	4	1	11	13	9	5	2	21	13	12	1	12	4	4	4	7	2	2	3	5	4	2	10	7	7	2	0	5	5	NA	NA	NA	NA	3458	NA	1.5	2305.33333333333	3	1
381	143081858002989	3	2	48	4	4	5	4	75110	9	5	1	11	75	1	1	1	12	8	7	2	9	3	3	3	3	1	NA	5	7	5	2	11	8	8	1	NA	5	5	NA	NA	NA	NA	3500	NA	1	3500	1	3
382	143081858041908	3	1	48	4	4	5	2	91521	9	5	4	8	91	1	1	1	12	8	7	1	17	4	4	4	3	1	NA	2	2	2	2	11	8	8	4	1	5	5	NA	NA	NA	NA	3800	NA	2.3	1652.17391304348	4	1
383	143081858046006	3	2	76	7	6	8	4	59392	7	4	1	8	59	2	2	2	17	10	9	3	10	7	7	7	NA	NA	NA	7	8	NA	2	11	8	8	1	NA	5	5	NA	NA	NA	NA	3450	NA	1	3450	1	3
384	143081858084927	3	2	50	5	5	6	4	65470	1	1	6	1	65	7	4	2	16	9	8	2	24	6	6	6	3	1	NA	5	7	5	2	11	8	8	2	0	7	7	NA	NA	NA	NA	NA	NA	NA	NA	NA	1
385	143081858120773	3	2	53	5	5	6	4	67180	6	3	1	9	67	3	2	2	1	1	1	1	20	5	5	5	3	1	NA	2	2	2	2	8	6	5	2	0	5	5	NA	NA	NA	NA	3500	NA	1.5	2333.33333333333	3	1
386	143081858135113	3	2	29	3	3	3	3	59375	2	2	5	4	59	2	2	2	17	10	9	1	12	4	4	4	3	1	NA	2	2	2	1	10	1	7	2	0	2	2	NA	1300	NA	NA	NA	NA	1.5	866.666666666667	6	3
387	143081858156627	3	1	55	5	5	6	2	94068	9	5	2	10	94	1	1	1	12	8	7	3	4	7	7	7	NA	NA	NA	7	8	NA	2	4	3	2	1	NA	1	1	800	NA	NA	NA	NA	NA	1	800	6	3
388	143081858165848	3	1	49	4	4	5	2	81140	4	2	1	7	81	7	4	2	16	9	8	1	6	3	3	3	6	2	2	3	5	4	2	10	7	7	5	1	6	6	NA	NA	NA	NA	NA	5500	2.8	1964.28571428571	3	1
389	143081858182234	3	1	66	6	6	7	2	83008	2	2	5	3	83	9	5	2	21	13	12	3	15	7	7	7	NA	NA	NA	7	8	NA	2	9	6	6	2	0	6	6	NA	NA	NA	NA	NA	5500	1.5	3666.66666666667	1	1
390	143081858182235	3	1	34	3	3	4	1	13002	8	4	2	8	13	9	5	2	21	13	12	1	20	5	5	5	3	1	NA	2	2	2	2	11	8	8	3	1	7	7	NA	NA	NA	NA	NA	NA	NA	NA	NA	1
391	143081858232427	3	2	69	6	6	7	4	44071	8	4	2	5	44	6	3	2	18	12	11	3	22	8	7	7	NA	NA	NA	7	8	NA	2	9	6	6	2	0	2	2	NA	1490	NA	NA	NA	NA	1.5	993.333333333333	5	1
392	143081858273394	3	2	39	4	4	4	4	83049	8	4	3	7	83	9	5	2	21	13	12	1	20	5	5	5	3	1	NA	2	2	2	2	9	6	6	3	1	4	4	NA	NA	NA	2100	NA	NA	1.8	1166.66666666667	5	1
393	143081858275443	3	1	45	4	4	5	2	75119	9	5	1	11	75	1	1	1	12	8	7	1	23	6	6	6	3	1	NA	2	2	2	2	3	2	1	1	NA	4	4	NA	NA	NA	2300	NA	NA	1	2300	3	4
394	143081858276470	3	2	33	3	3	4	3	83137	8	4	1	11	83	9	5	2	21	13	12	1	15	4	4	4	3	1	NA	2	2	2	2	11	8	8	2	0	6	6	NA	NA	NA	NA	NA	4080	1.5	2720	2	1
395	143081858373636	3	1	51	5	5	6	2	68374	6	3	3	5	68	3	2	2	1	1	1	1	23	6	6	6	3	1	NA	2	2	2	2	5	4	3	4	0	5	5	NA	NA	NA	NA	3500	NA	2.5	1400	4	1
396	143081858415627	3	2	69	6	6	7	4	34217	8	4	3	5	34	9	5	2	13	9	8	3	7	7	7	7	NA	NA	NA	7	8	NA	2	11	8	8	2	0	7	7	NA	NA	NA	NA	NA	NA	NA	NA	NA	1
397	143081858452497	3	1	55	5	5	6	2	92062	9	5	2	9	92	1	1	1	12	8	7	1	17	4	4	4	3	1	NA	2	2	2	2	7	5	4	1	NA	3	3	NA	NA	1990	NA	NA	NA	1	1990	3	3
398	143081858459668	3	2	75	7	6	8	4	75120	9	5	1	11	75	1	1	1	12	8	7	3	20	8	7	7	NA	NA	NA	7	8	NA	2	7	5	4	1	NA	2	2	NA	1355	NA	NA	NA	NA	1	1355	4	4
399	143081858470936	3	1	46	4	4	5	2	26016	1	1	6	1	26	8	5	2	22	3	3	1	27	6	6	6	3	1	NA	2	2	2	2	10	7	7	4	2	5	5	NA	NA	NA	NA	3750	NA	2.1	1785.71428571429	4	1
400	143081858470937	3	1	52	5	5	6	2	78361	9	5	4	9	78	1	1	1	12	8	7	1	22	5	5	5	3	1	NA	2	2	2	2	2	2	1	1	NA	2	2	NA	1200	NA	NA	NA	NA	1	1200	5	4
401	143081858485276	3	1	62	5	5	7	2	62747	8	4	3	1	62	2	2	2	17	10	9	1	6	3	3	3	4	2	NA	2	3	3	2	9	6	6	2	0	6	6	NA	NA	NA	NA	NA	6000	1.5	4000	1	1
402	143081858520093	3	1	42	4	4	5	2	69149	8	4	3	8	69	8	5	2	22	3	3	2	15	4	4	4	4	2	NA	5	7	5	2	11	8	8	4	2	5	5	NA	NA	NA	NA	3800	NA	2.1	1809.52380952381	4	1
403	143081858571303	3	2	61	5	5	7	4	80021	7	4	1	11	80	4	2	2	19	10	9	1	7	3	3	3	5	2	2	3	5	4	2	11	8	8	1	NA	4	4	NA	NA	NA	2600	NA	NA	1	2600	2	2
404	143081858584618	3	2	49	4	4	5	4	69294	8	4	2	3	69	8	5	2	22	3	3	1	11	4	4	4	5	2	1	3	5	4	2	10	7	7	2	0	6	6	NA	NA	NA	NA	NA	4500	1.5	3000	2	1
405	143081858792500	3	1	70	6	6	8	2	69266	8	4	4	11	69	8	5	2	22	3	3	3	4	7	7	7	NA	NA	NA	7	8	NA	2	11	8	8	2	0	4	4	NA	NA	NA	2995	NA	NA	1.5	1996.66666666667	3	2
406	143081858793526	3	1	49	4	4	5	2	38377	5	3	3	3	38	8	5	2	22	3	3	1	25	6	6	6	3	1	NA	2	2	2	2	9	6	6	5	2	6	6	NA	NA	NA	NA	NA	5020	2.6	1930.76923076923	3	1
407	143081858810936	3	1	46	4	4	5	2	12059	1	1	6	1	12	7	4	2	16	9	8	7	17	7	7	8	NA	NA	NA	8	8	NA	2	10	7	7	2	0	4	4	NA	NA	NA	2800	NA	NA	1.5	1866.66666666667	3	1
408	143081858822203	3	2	46	4	4	5	4	11069	5	3	1	9	11	9	5	2	13	9	8	1	11	4	4	4	3	1	NA	2	2	2	2	11	8	8	2	0	4	4	NA	NA	NA	2500	NA	NA	1.5	1666.66666666667	4	1
409	143081859004490	3	1	48	4	4	5	2	31187	4	2	1	7	31	7	4	2	16	9	8	1	16	4	4	4	5	2	2	3	5	4	2	8	6	5	4	0	6	6	NA	NA	NA	NA	NA	5000	2.5	2000	3	1
410	143081859007563	3	1	50	5	5	6	2	2722	5	3	1	8	2	4	2	2	19	10	9	1	10	3	3	3	3	1	NA	2	2	2	2	11	8	8	9	1	6	6	NA	NA	NA	NA	NA	6500	4.8	1354.16666666667	4	1
411	143081859070033	3	2	61	5	5	7	4	3095	6	3	1	7	3	8	5	2	3	3	3	7	21	8	7	8	NA	NA	NA	8	8	NA	1	8	1	5	1	NA	2	2	NA	1135	NA	NA	NA	NA	1	1135	5	3
412	143081859158102	3	1	48	4	4	5	2	74010	7	4	1	11	74	8	5	2	22	3	3	1	20	5	5	5	3	1	NA	2	2	2	2	10	7	7	4	2	5	5	NA	NA	NA	NA	3500	NA	2.1	1666.66666666667	4	1
413	143081859195994	3	1	80	7	6	8	2	35228	5	3	1	5	35	6	3	2	6	5	5	3	12	7	7	7	NA	NA	NA	7	8	NA	2	10	7	7	2	0	5	5	NA	NA	NA	NA	3350	NA	1.5	2233.33333333333	3	1
414	143081859297394	3	2	71	6	6	8	4	75119	9	5	1	11	75	1	1	1	12	8	7	3	9	7	7	7	NA	NA	NA	7	8	NA	2	11	8	8	1	NA	3	3	NA	NA	1850	NA	NA	NA	1	1850	4	3
415	143081859341438	3	1	46	4	4	5	2	54482	8	4	3	6	54	3	2	2	15	1	1	1	16	4	4	4	5	2	2	3	5	4	2	10	7	7	1	NA	4	4	NA	NA	NA	2400	NA	NA	1	2400	3	3
416	143081859356676	3	1	58	5	5	6	2	84019	4	2	5	7	84	9	5	2	21	13	12	6	18	8	7	8	NA	NA	NA	8	8	NA	2	6	5	4	2	0	7	7	NA	NA	NA	NA	NA	NA	NA	NA	NA	1
417	143081859426317	3	2	45	4	4	5	4	13103	6	3	1	9	13	9	5	2	21	13	12	1	20	5	5	5	3	1	NA	2	2	2	2	8	6	5	3	1	2	2	NA	1280	NA	NA	NA	NA	1.8	711.111111111111	6	3
418	143081859438613	3	1	57	5	5	6	2	60183	1	1	6	1	60	4	2	2	19	10	9	1	22	5	5	5	3	1	NA	2	2	2	2	8	6	5	3	0	6	6	NA	NA	NA	NA	NA	4100	2	2050	3	1
419	143081859492888	3	1	35	4	4	4	2	77315	5	3	1	4	77	1	1	1	12	8	7	1	9	3	3	3	3	1	NA	2	2	2	2	11	8	8	4	2	6	6	NA	NA	NA	NA	NA	6000	2.1	2857.14285714286	2	1
420	143081859590185	3	1	49	4	4	5	2	81257	6	3	4	5	81	7	4	2	16	9	8	6	3	7	7	8	NA	NA	NA	8	8	NA	2	8	6	5	2	0	4	4	NA	NA	NA	2200	NA	NA	1.5	1466.66666666667	4	1
421	143081859595308	3	1	62	5	5	7	2	26166	4	2	4	5	26	8	5	2	22	3	3	3	18	8	7	7	NA	NA	NA	7	8	NA	2	5	4	3	1	NA	2	2	NA	1050	NA	NA	NA	NA	1	1050	5	3
422	143081859682366	3	1	73	6	6	8	2	92044	9	5	2	10	92	1	1	1	12	8	7	3	9	7	7	7	NA	NA	NA	7	8	NA	2	8	6	5	2	0	6	6	NA	NA	NA	NA	NA	4200	1.5	2800	2	1
423	143081859686464	3	1	37	4	4	4	2	60395	4	2	5	7	60	4	2	2	19	10	9	5	NA	9	8	8	NA	NA	NA	6	8	NA	2	5	4	3	5	3	2	2	NA	1450	NA	NA	NA	NA	2.4	604.166666666667	6	1
424	143081859856468	3	2	20	2	2	3	3	69387	8	4	1	11	69	8	5	2	22	3	3	1	9	3	3	3	3	1	NA	2	2	2	2	11	8	8	2	0	4	4	NA	NA	NA	2999	NA	NA	1.5	1999.33333333333	3	1
425	143081860241515	3	2	45	4	4	5	4	26347	5	3	1	5	26	8	5	2	22	3	3	1	23	6	6	6	3	1	NA	2	2	2	2	11	8	8	2	0	2	2	NA	1350	NA	NA	NA	NA	1.5	900	5	3
426	143081860278392	3	1	25	3	3	3	1	67194	2	2	5	4	67	3	2	2	1	1	1	1	9	3	3	3	3	1	NA	2	2	2	2	11	8	8	2	0	5	5	NA	NA	NA	NA	3200	NA	1.5	2133.33333333333	3	1
427	143081860305920	3	2	25	3	3	3	3	31555	8	4	1	11	31	7	4	2	16	9	8	1	27	6	6	6	3	1	NA	2	2	2	2	9	6	6	2	0	4	4	NA	NA	NA	2300	NA	NA	1.5	1533.33333333333	4	1
428	143081860315141	3	2	62	5	5	7	4	59599	8	4	4	10	59	2	2	2	17	10	9	1	18	5	5	5	4	2	NA	2	3	3	2	8	6	5	2	0	3	3	NA	NA	1600	NA	NA	NA	1.5	1066.66666666667	5	3
429	143081860333584	3	2	23	2	2	3	3	51454	8	4	1	11	51	4	2	2	8	1	1	1	20	5	5	5	3	1	NA	2	2	2	1	11	1	8	1	NA	2	2	NA	1445	NA	NA	NA	NA	1	1445	4	3
430	143081860343831	3	2	47	4	4	5	4	82013	2	2	5	4	82	7	4	2	16	9	8	1	26	6	6	6	3	1	NA	2	2	2	2	10	7	7	4	2	5	5	NA	NA	NA	NA	3200	NA	2.1	1523.80952380952	4	1
431	143081860348952	3	1	39	4	4	4	2	62410	1	1	6	1	62	2	2	2	17	10	9	1	28	6	6	6	3	1	NA	2	2	2	2	10	7	7	3	0	2	2	NA	1400	NA	NA	NA	NA	2	700	6	4
432	143081860368421	3	2	33	3	3	4	3	57597	8	4	4	3	57	3	2	2	15	1	1	2	15	4	4	4	3	1	NA	5	7	5	2	11	8	8	1	NA	3	3	NA	NA	1600	NA	NA	NA	1	1600	4	3
433	143081860421681	3	2	76	7	6	8	4	6126	2	2	5	3	6	9	5	2	21	13	12	3	8	7	7	7	NA	NA	NA	7	8	NA	2	11	8	8	1	NA	7	7	NA	NA	NA	NA	NA	NA	NA	NA	NA	3
434	143081860455480	3	1	78	7	6	8	2	34010	2	2	5	3	34	9	5	2	13	9	8	3	6	7	7	7	NA	NA	NA	7	8	NA	2	11	8	8	2	0	6	6	NA	NA	NA	NA	NA	4300	1.5	2866.66666666667	2	1
435	143081860481090	3	2	33	3	3	4	3	5061	5	3	1	9	5	9	5	2	21	13	12	1	15	4	4	4	3	1	NA	2	2	2	2	11	8	8	3	1	2	2	NA	1400	NA	NA	NA	NA	1.8	777.777777777778	6	1
436	143081860491331	3	1	68	6	6	7	2	64024	8	4	1	9	64	7	4	2	2	2	2	3	6	7	7	7	NA	NA	NA	7	8	NA	2	8	6	5	2	0	4	4	NA	NA	NA	2990	NA	NA	1.5	1993.33333333333	3	1
437	143081860522057	3	1	58	5	5	6	2	68137	1	1	6	1	68	3	2	2	1	1	1	1	23	6	6	6	3	1	NA	2	2	2	2	7	5	4	5	2	5	5	NA	NA	NA	NA	3500	NA	2.6	1346.15384615385	4	1
438	143081860558936	3	1	63	5	5	7	2	75113	9	5	1	11	75	1	1	1	12	8	7	1	14	4	4	4	4	2	NA	2	3	3	2	8	6	5	2	0	5	5	NA	NA	NA	NA	3800	NA	1.5	2533.33333333333	2	1
439	143081860590685	3	2	39	4	4	4	4	69266	8	4	4	11	69	8	5	2	22	3	3	1	12	4	4	4	3	1	NA	2	2	2	2	11	8	8	1	NA	2	2	NA	1100	NA	NA	NA	NA	1	1100	5	4
440	143081860650102	3	2	46	4	4	5	4	60247	1	1	6	1	60	4	2	2	19	10	9	1	20	5	5	5	3	1	NA	2	2	2	2	8	6	5	3	0	4	4	NA	NA	NA	2900	NA	NA	2	1450	4	1
441	143081860731912	3	1	32	3	3	4	1	34058	3	2	5	5	34	9	5	2	13	9	8	1	18	5	5	5	5	2	2	3	5	4	2	9	6	6	4	2	6	6	NA	NA	NA	NA	NA	6000	2.1	2857.14285714286	2	1
442	143081860768787	3	1	45	4	4	5	2	51612	2	2	5	3	51	4	2	2	8	1	1	1	18	5	5	5	6	2	2	3	5	4	2	10	7	7	3	1	6	6	NA	NA	NA	NA	NA	4400	1.8	2444.44444444444	3	1
443	143081860829230	3	2	70	6	6	8	4	77284	6	3	1	10	77	1	1	1	12	8	7	1	15	4	4	4	3	1	NA	2	2	2	2	8	6	5	1	NA	4	4	NA	NA	NA	2600	NA	NA	1	2600	2	3
444	143081860866104	3	2	75	7	6	8	4	92044	9	5	2	10	92	1	1	1	12	8	7	3	6	7	7	7	NA	NA	NA	7	8	NA	2	9	6	6	2	0	5	5	NA	NA	NA	NA	3400	NA	1.5	2266.66666666667	3	1
445	143081861002324	3	2	53	5	5	6	4	32311	1	1	6	1	32	7	4	2	16	9	8	1	20	5	5	5	3	1	NA	2	2	2	2	8	6	5	3	0	2	2	NA	1250	NA	NA	NA	NA	2	625	6	3
446	143081861170182	3	1	45	4	4	5	2	3111	1	1	6	2	3	8	5	2	3	3	3	1	24	6	6	6	3	1	NA	2	2	2	2	6	5	4	2	0	5	5	NA	NA	NA	NA	3500	NA	1.5	2333.33333333333	3	1
447	143081861229594	3	1	72	6	6	8	2	30206	2	2	5	4	30	9	5	2	13	9	8	3	4	7	7	7	NA	NA	NA	7	8	NA	2	7	5	4	2	0	6	6	NA	NA	NA	NA	NA	5000	1.5	3333.33333333333	1	1
448	143081861242909	3	1	31	3	3	4	1	13103	6	3	1	9	13	9	5	2	21	13	12	1	19	5	5	5	5	2	2	3	5	4	2	8	6	5	3	1	5	5	NA	NA	NA	NA	3500	NA	1.8	1944.44444444444	3	1
449	143081861365819	3	1	78	7	6	8	2	86070	3	2	5	5	86	6	3	2	20	2	2	3	6	7	7	7	NA	NA	NA	7	8	NA	2	8	6	5	2	0	6	6	NA	NA	NA	NA	NA	4700	1.5	3133.33333333333	1	1
450	143081861370941	3	2	41	4	4	5	4	8491	3	2	1	4	8	4	2	2	8	1	1	6	20	8	7	8	NA	NA	NA	8	8	NA	2	11	8	8	4	2	2	2	NA	1004	NA	NA	NA	NA	2.1	478.095238095238	6	1
451	143081861382208	3	1	25	3	3	3	1	34032	6	3	1	10	34	9	5	2	13	9	8	7	24	8	7	8	NA	NA	NA	8	8	NA	2	9	6	6	2	0	7	7	NA	NA	NA	NA	NA	NA	NA	NA	NA	1
452	143081861401674	3	2	22	2	2	3	3	59220	8	4	3	7	59	2	2	2	17	10	9	1	21	5	5	5	3	1	NA	2	2	2	2	10	7	7	2	0	7	7	NA	NA	NA	NA	NA	NA	NA	NA	NA	1
453	143081861591133	3	2	68	6	6	7	4	53062	4	2	1	7	53	6	3	2	18	12	11	3	11	7	7	7	NA	NA	NA	7	8	NA	2	8	6	5	2	0	5	5	NA	NA	NA	NA	3100	NA	1.5	2066.66666666667	3	1
454	143081861687401	3	1	69	6	6	7	2	57447	8	4	2	7	57	3	2	2	15	1	1	3	17	7	7	7	NA	NA	NA	7	8	NA	2	6	5	4	2	0	5	5	NA	NA	NA	NA	3350	NA	1.5	2233.33333333333	3	1
455	143081861825544	3	1	74	6	6	8	2	25462	5	3	1	7	25	3	2	2	10	4	4	3	6	7	7	7	NA	NA	NA	7	8	NA	2	11	8	8	2	0	6	6	NA	NA	NA	NA	NA	5300	1.5	3533.33333333333	1	1
456	143081861976115	3	2	40	4	4	5	4	59350	8	4	1	11	59	2	2	2	17	10	9	2	12	4	4	4	3	1	NA	5	7	5	2	10	7	7	5	3	4	4	NA	NA	NA	2000	NA	NA	2.4	833.333333333333	6	1
457	143081862070345	3	1	50	5	5	6	2	1142	8	4	3	4	1	8	5	2	22	3	3	1	16	4	4	4	3	1	NA	2	2	2	2	10	7	7	1	NA	5	5	NA	NA	NA	NA	3500	NA	1	3500	1	4
458	143081862157412	3	2	38	4	4	4	4	60143	2	2	5	3	60	4	2	2	19	10	9	1	20	5	5	5	3	1	NA	2	2	2	2	8	6	5	3	1	7	7	NA	NA	NA	NA	NA	NA	NA	NA	NA	1
459	143081862209653	3	1	77	7	6	8	2	24142	1	1	6	2	24	7	4	2	2	2	2	3	12	7	7	7	NA	NA	NA	7	8	NA	2	4	3	2	2	0	4	4	NA	NA	NA	2300	NA	NA	1.5	1533.33333333333	4	1
460	143081862215799	3	1	45	4	4	5	2	68156	5	3	3	3	68	3	2	2	1	1	1	1	24	6	6	6	3	1	NA	2	2	2	1	6	1	4	3	1	5	5	NA	NA	NA	NA	3600	NA	1.8	2000	3	1
461	143081862388779	3	2	49	4	4	5	4	13208	8	4	1	11	13	9	5	2	21	13	12	1	9	3	3	3	3	1	NA	2	2	2	2	11	8	8	3	1	7	7	NA	NA	NA	NA	NA	NA	NA	NA	NA	2
462	143081862435911	3	1	72	6	6	8	2	63034	1	1	6	2	63	8	5	2	3	3	3	3	17	7	7	7	NA	NA	NA	7	8	NA	2	9	6	6	1	NA	4	4	NA	NA	NA	2100	NA	NA	1	2100	3	3
463	143081862560770	3	2	18	2	2	2	3	76351	8	4	1	11	76	5	3	2	11	11	10	5	NA	9	8	8	NA	NA	NA	6	8	NA	1	9	1	6	2	0	1	1	800	NA	NA	NA	NA	NA	1.5	533.333333333333	6	1
464	143081862746193	3	1	33	3	3	4	1	95183	9	5	2	5	95	1	1	1	12	8	7	1	25	6	6	6	3	1	NA	2	2	2	2	8	6	5	1	NA	2	2	NA	1300	NA	NA	NA	NA	1	1300	5	3
465	143081862746194	3	1	60	5	5	7	2	63113	8	4	1	11	63	8	5	2	3	3	3	1	9	3	3	3	3	1	NA	2	2	2	2	10	7	7	2	0	4	4	NA	NA	NA	2400	NA	NA	1.5	1600	4	3
466	143081863603258	3	1	31	3	3	4	1	42218	8	4	1	11	42	8	5	2	22	3	3	1	18	5	5	5	7	2	3	3	4	4	2	7	5	4	3	1	4	4	NA	NA	NA	2800	NA	NA	1.8	1555.55555555556	4	1
467	143081863646285	3	2	38	4	4	4	4	69383	8	4	1	11	69	8	5	2	22	3	3	1	19	5	5	5	9	1	NA	2	2	2	2	6	5	4	3	2	4	4	NA	NA	NA	2050	NA	NA	1.6	1281.25	5	3
468	143081863647312	3	2	30	3	3	4	3	51103	1	1	6	1	51	4	2	2	8	1	1	7	23	8	7	8	NA	NA	NA	8	8	NA	2	10	7	7	3	1	4	4	NA	NA	NA	2858	NA	NA	1.8	1587.77777777778	4	1
469	143081863665756	3	2	24	2	2	3	3	94081	9	5	4	10	94	1	1	1	12	8	7	5	NA	9	8	8	NA	NA	NA	6	8	NA	1	10	1	7	2	0	3	3	NA	NA	1700	NA	NA	NA	1.5	1133.33333333333	5	2
470	143081864325238	3	1	54	5	5	6	2	13211	8	4	1	11	13	9	5	2	21	13	12	1	17	4	4	4	4	2	NA	2	3	3	2	9	6	6	2	0	7	7	NA	NA	NA	NA	NA	NA	NA	NA	NA	1
471	143081864377377	3	1	46	4	4	5	2	13205	8	4	1	11	13	9	5	2	21	13	12	1	30	10	8	8	3	1	NA	2	2	2	1	1	1	1	1	NA	7	7	NA	NA	NA	NA	NA	NA	NA	NA	NA	1
472	143081864546422	3	2	42	4	4	5	4	43157	5	3	1	7	43	8	5	2	3	3	3	1	18	5	5	5	5	2	3	3	4	4	2	9	6	6	3	0	2	2	NA	1400	NA	NA	NA	NA	2	700	6	3
473	143081864744980	3	1	30	3	3	4	1	62443	8	4	4	5	62	2	2	2	17	10	9	1	23	6	6	6	9	1	NA	2	2	2	2	6	5	4	5	3	4	4	NA	NA	NA	2100	NA	NA	2.4	875	6	1
474	143081864795194	3	1	76	7	6	8	2	29019	8	4	1	11	29	6	3	2	6	5	5	3	4	7	7	7	NA	NA	NA	7	8	NA	2	7	5	4	2	0	2	2	NA	1200	NA	NA	NA	NA	1.5	800	6	1
475	143081864982643	3	2	20	2	2	3	3	95637	9	5	3	7	95	1	1	1	12	8	7	2	21	5	5	5	3	1	NA	5	7	5	2	10	7	7	5	0	7	7	NA	NA	NA	NA	NA	NA	NA	NA	NA	4
476	143081865218111	3	1	50	5	5	6	2	77288	9	5	4	9	77	1	1	1	12	8	7	1	18	5	5	5	5	2	2	3	5	4	2	9	6	6	6	2	5	5	NA	NA	NA	NA	3900	NA	3.1	1258.06451612903	5	1
477	143081865224262	3	1	45	4	4	5	2	63113	8	4	1	11	63	8	5	2	3	3	3	1	19	5	5	5	5	2	2	3	5	4	2	9	6	6	1	NA	4	4	NA	NA	NA	2500	NA	NA	1	2500	2	2
478	143081865495628	3	2	34	3	3	4	3	59271	7	4	4	8	59	2	2	2	17	10	9	6	18	8	7	8	NA	NA	NA	8	8	NA	2	9	6	6	4	2	3	3	NA	NA	1800	NA	NA	NA	2.1	857.142857142857	6	1
479	143081865745467	3	2	32	3	3	4	3	51454	8	4	1	11	51	4	2	2	8	1	1	5	NA	9	8	8	NA	NA	NA	6	8	NA	1	7	1	4	3	0	1	1	900	NA	NA	NA	NA	NA	2	450	6	3
480	143081865764935	3	1	31	3	3	4	1	81204	5	3	3	3	81	7	4	2	16	9	8	1	16	4	4	4	3	1	NA	2	2	2	2	8	6	5	1	NA	2	2	NA	1400	NA	NA	NA	NA	1	1400	4	3
481	143081865890921	3	1	37	4	4	4	2	68157	1	1	6	2	68	3	2	2	1	1	1	7	24	8	7	8	NA	NA	NA	8	8	NA	2	6	5	4	4	1	1	1	850	NA	NA	NA	NA	NA	2.3	369.565217391304	6	3
482	143081865895035	3	2	30	3	3	4	3	91661	9	5	2	7	91	1	1	1	12	8	7	2	15	4	4	4	3	1	NA	5	7	5	2	11	8	8	4	2	2	2	NA	1300	NA	NA	NA	NA	2.1	619.047619047619	6	1
483	143081865940034	3	1	35	4	4	4	2	43190	1	1	6	4	43	8	5	2	3	3	3	1	17	4	4	4	3	1	NA	2	2	2	2	10	7	7	2	0	5	5	NA	NA	NA	NA	3350	NA	1.5	2233.33333333333	3	1
484	143081865959523	3	2	34	3	3	4	3	69387	8	4	1	11	69	8	5	2	22	3	3	2	20	5	5	5	3	1	NA	5	7	5	2	8	6	5	4	2	2	2	NA	1200	NA	NA	NA	NA	2.1	571.428571428571	6	4
485	143081865979935	3	1	49	4	4	5	2	59068	7	4	4	3	59	2	2	2	17	10	9	2	26	6	6	6	3	1	NA	5	7	5	2	7	5	4	5	2	3	3	NA	NA	1600	NA	NA	NA	2.6	615.384615384615	6	1
486	143081865983019	3	2	30	3	3	4	3	62193	7	4	1	10	62	2	2	2	17	10	9	2	9	3	3	3	9	1	NA	5	7	5	2	9	6	6	1	NA	2	2	NA	1370	NA	NA	NA	NA	1	1370	4	3
487	143081865985074	3	1	65	6	6	7	2	79049	4	2	5	7	79	6	3	2	20	2	2	3	4	7	7	7	NA	NA	NA	7	8	NA	2	10	7	7	2	0	6	6	NA	NA	NA	NA	NA	4200	1.5	2800	2	1
488	143081865989186	3	1	75	7	6	8	2	72175	1	1	6	2	72	6	3	2	18	12	11	3	14	7	7	7	NA	NA	NA	7	8	NA	2	10	7	7	1	NA	4	4	NA	NA	NA	2100	NA	NA	1	2100	3	3
489	143081865997412	3	2	19	2	2	2	3	54395	8	4	1	11	54	3	2	2	15	1	1	5	NA	9	8	8	NA	NA	NA	6	8	NA	1	8	1	5	2	0	1	1	900	NA	NA	NA	NA	NA	1.5	600	6	1
490	143081866003458	3	1	33	3	3	4	1	95280	9	5	4	9	95	1	1	1	12	8	7	1	25	6	6	6	3	1	NA	2	2	2	2	2	2	1	5	3	4	4	NA	NA	NA	2700	NA	NA	2.4	1125	5	1
491	143142247320641	3	1	44	4	4	5	2	21231	8	4	1	11	21	4	2	2	5	4	4	1	3	2	2	2	2	4	NA	2	1	1	2	10	7	7	3	1	6	6	NA	NA	NA	NA	NA	4200	1.8	2333.33333333333	3	1
492	143142247553116	3	2	51	5	5	6	4	14333	4	2	1	5	14	5	3	2	4	11	10	1	10	3	3	3	3	1	NA	2	2	2	2	10	7	7	1	NA	5	5	NA	NA	NA	NA	3300	NA	1	3300	1	3
493	143142247632998	3	1	60	5	5	7	2	53034	3	2	5	5	53	6	3	2	18	12	11	3	6	7	7	7	NA	NA	NA	7	8	NA	2	8	6	5	2	0	5	5	NA	NA	NA	NA	3900	NA	1.5	2600	2	1
494	143142247806078	3	1	52	5	5	6	2	14684	1	1	6	1	14	5	3	2	4	11	10	1	10	3	3	3	3	1	NA	2	2	2	2	11	8	8	6	3	6	6	NA	NA	NA	NA	NA	5200	2.9	1793.10344827586	4	1
495	143142247996437	3	2	40	4	4	5	4	27005	1	1	6	2	27	5	3	2	11	11	10	1	16	4	4	4	3	1	NA	2	2	2	2	10	7	7	3	1	6	6	NA	NA	NA	NA	NA	6500	1.8	3611.11111111111	1	1
496	143142248017944	3	1	55	5	5	6	2	44209	3	2	5	5	44	6	3	2	18	12	11	1	17	4	4	4	3	1	NA	2	2	2	1	10	1	7	3	1	6	6	NA	NA	NA	NA	NA	5500	1.8	3055.55555555556	2	1
497	143142248051740	3	2	59	5	5	6	4	55063	2	2	1	3	55	3	2	2	15	1	1	1	7	3	3	3	5	2	2	3	5	4	2	11	8	8	2	0	6	6	NA	NA	NA	NA	NA	5500	1.5	3666.66666666667	1	1
498	143142248237107	3	1	61	5	5	7	2	76101	2	2	1	3	76	5	3	2	11	11	10	1	7	3	3	3	4	2	NA	2	3	3	2	10	7	7	2	0	6	6	NA	NA	NA	NA	NA	4600	1.5	3066.66666666667	2	1
499	143142248549466	3	1	54	5	5	6	2	44038	1	1	6	3	44	6	3	2	18	12	11	1	11	4	4	4	5	2	2	3	5	4	2	10	7	7	2	0	6	6	NA	NA	NA	NA	NA	4140	1.5	2760	2	1
500	143142248568926	3	2	55	5	5	6	4	44213	3	2	5	5	44	6	3	2	18	12	11	6	22	8	7	8	NA	NA	NA	8	8	NA	2	10	7	7	3	0	4	4	NA	NA	NA	2350	NA	NA	2	1175	5	1
501	143142249087010	3	2	53	5	5	6	4	58305	1	1	6	1	58	4	2	2	5	4	4	1	11	4	4	4	3	1	NA	2	2	2	2	11	8	8	3	1	6	6	NA	NA	NA	NA	NA	5000	1.8	2777.77777777778	2	1
502	143146186424326	4	1	46	4	4	5	2	83137	8	4	1	11	83	9	5	2	21	13	12	1	3	2	2	2	2	4	NA	2	1	1	2	8	6	5	1	NA	6	6	NA	NA	NA	NA	NA	6600	1	6600	1	4
503	143146186465288	4	1	64	5	5	7	2	44114	8	4	2	8	44	6	3	2	18	12	11	3	21	8	7	7	NA	NA	NA	7	8	NA	2	10	7	7	2	0	5	5	NA	NA	NA	NA	3800	NA	1.5	2533.33333333333	2	1
504	143146186516490	4	1	60	5	5	7	2	62032	8	4	4	4	62	2	2	2	17	10	9	3	21	8	7	7	NA	NA	NA	7	8	NA	2	2	2	1	2	0	3	3	NA	NA	1900	NA	NA	NA	1.5	1266.66666666667	5	1
505	143146186571789	4	1	54	5	5	6	2	38519	3	2	1	3	38	8	5	2	22	3	3	1	10	3	3	3	3	1	NA	2	2	2	2	11	8	8	4	0	7	7	NA	NA	NA	NA	NA	NA	NA	NA	NA	1
506	143146186577935	4	2	65	6	6	7	4	75116	9	5	1	11	75	1	1	1	12	8	7	1	5	3	3	3	3	1	NA	2	2	2	2	11	8	8	1	NA	4	4	NA	NA	NA	2999	NA	NA	1	2999	2	3
507	143146186587153	4	1	74	6	6	8	2	93077	9	5	3	9	93	1	1	1	12	8	7	3	9	7	7	7	NA	NA	NA	7	8	NA	2	10	7	7	2	0	5	5	NA	NA	NA	NA	3500	NA	1.5	2333.33333333333	3	1
508	143146186589202	4	1	49	4	4	5	2	35288	5	3	5	9	35	6	3	2	6	5	5	1	16	4	4	4	3	1	NA	2	2	2	1	6	1	4	3	0	5	5	NA	NA	NA	NA	3500	NA	2	1750	4	4
509	143146186643482	4	2	50	5	5	6	4	75118	9	5	1	11	75	1	1	1	12	8	7	1	8	3	3	3	4	2	NA	2	3	3	2	11	8	8	1	NA	4	4	NA	NA	NA	2050	NA	NA	1	2050	3	3
510	143146186657822	4	1	34	3	3	4	1	7042	3	2	5	5	7	8	5	2	22	3	3	1	24	6	6	6	3	1	NA	2	2	2	2	10	7	7	3	0	6	6	NA	NA	NA	NA	NA	4027	2	2013.5	3	3
511	143146186659871	4	1	72	6	6	8	2	66196	3	2	1	3	66	9	5	2	13	9	8	3	19	8	7	7	NA	NA	NA	7	8	NA	2	6	5	4	2	0	5	5	NA	NA	NA	NA	3900	NA	1.5	2600	2	1
512	143146186668065	4	1	45	4	4	5	2	14327	7	4	4	8	14	5	3	2	4	11	10	1	10	3	3	3	3	1	NA	2	2	2	2	11	8	8	1	NA	5	5	NA	NA	NA	NA	3500	NA	1	3500	1	4
513	143146186696743	4	1	36	4	4	4	2	21332	1	1	6	1	21	4	2	2	5	4	4	1	12	4	4	4	1	3	NA	1	1	1	2	10	7	7	5	3	6	6	NA	NA	NA	NA	NA	5500	2.4	2291.66666666667	3	1
514	143146186729521	4	1	59	5	5	6	2	75112	9	5	1	11	75	1	1	1	12	8	7	1	9	3	3	3	3	1	NA	2	2	2	2	11	8	8	1	NA	6	6	NA	NA	NA	NA	NA	4500	1	4500	1	4
515	143146186747960	4	1	56	5	5	6	2	40192	5	3	1	8	40	7	4	2	2	2	2	3	19	8	7	7	NA	NA	NA	7	8	NA	2	11	8	8	4	0	6	6	NA	NA	NA	NA	NA	6000	2.5	2400	3	1
516	143146186754105	4	1	53	5	5	6	2	54395	8	4	1	11	54	3	2	2	15	1	1	1	18	5	5	5	1	3	NA	1	1	1	2	11	8	8	4	2	5	5	NA	NA	NA	NA	3580	NA	2.1	1704.7619047619	4	1
517	143146186776636	4	2	38	4	4	4	4	41018	6	3	1	9	41	5	3	2	7	6	6	1	15	4	4	4	3	1	NA	2	2	2	2	8	6	5	1	NA	3	3	NA	NA	1750	NA	NA	NA	1	1750	4	3
518	143146186828869	4	2	70	6	6	8	4	92049	9	5	2	9	92	1	1	1	12	8	7	3	20	8	7	7	NA	NA	NA	7	8	NA	2	5	4	3	2	0	3	3	NA	NA	1950	NA	NA	NA	1.5	1300	5	1
519	143146186844232	4	2	60	5	5	7	4	87085	7	4	1	11	87	7	4	2	14	2	2	1	17	4	4	4	9	1	NA	2	2	2	2	6	5	4	2	0	7	7	NA	NA	NA	NA	NA	NA	NA	NA	NA	2
520	143146186848330	4	1	62	5	5	7	2	86234	1	1	6	1	86	6	3	2	20	2	2	3	9	7	7	7	NA	NA	NA	7	8	NA	2	7	5	4	2	0	5	5	NA	NA	NA	NA	3880	NA	1.5	2586.66666666667	2	1
521	143146186865741	4	2	75	7	6	8	4	54431	5	3	1	7	54	3	2	2	15	1	1	3	7	7	7	7	NA	NA	NA	7	8	NA	2	11	8	8	2	0	7	7	NA	NA	NA	NA	NA	NA	NA	NA	NA	1
522	143146186890320	4	2	66	6	6	7	4	75113	9	5	1	11	75	1	1	1	12	8	7	3	6	7	7	7	NA	NA	NA	7	8	NA	2	7	5	4	1	NA	5	5	NA	NA	NA	NA	3600	NA	1	3600	1	4
523	143146187023458	4	1	52	5	5	6	2	69266	8	4	4	11	69	8	5	2	22	3	3	1	21	5	5	5	3	1	NA	2	2	2	2	3	2	1	1	NA	7	7	NA	NA	NA	NA	NA	NA	NA	NA	NA	3
524	143146187050089	4	2	61	5	5	7	4	22225	5	3	1	5	22	6	3	2	6	5	5	3	22	8	7	7	NA	NA	NA	7	8	NA	2	7	5	4	2	0	5	5	NA	NA	NA	NA	3500	NA	1.5	2333.33333333333	3	1
525	143146187071601	4	2	44	4	4	5	4	41194	4	2	5	7	41	5	3	2	7	6	6	7	7	7	7	8	NA	NA	NA	8	8	NA	2	11	8	8	5	3	4	4	NA	NA	NA	2500	NA	NA	2.4	1041.66666666667	5	1
526	143146187099252	4	2	34	3	3	4	3	16341	7	4	4	3	16	6	3	2	20	2	2	2	28	6	6	6	7	2	3	5	7	5	2	6	5	4	4	2	3	3	NA	NA	1500	NA	NA	NA	2.1	714.285714285714	6	1
527	143146187100277	4	1	67	6	6	7	2	28348	4	2	1	4	28	5	3	2	7	6	6	3	14	7	7	7	NA	NA	NA	7	8	NA	2	8	6	5	2	0	4	4	NA	NA	NA	2300	NA	NA	1.5	1533.33333333333	4	1
528	143146187113591	4	1	70	6	6	8	2	34160	1	1	6	1	34	9	5	2	13	9	8	3	9	7	7	7	NA	NA	NA	7	8	NA	2	8	6	5	2	0	5	5	NA	NA	NA	NA	3800	NA	1.5	2533.33333333333	2	1
529	143146187281531	4	2	64	5	5	7	4	10387	7	4	1	10	10	4	2	2	8	1	1	3	11	7	7	7	NA	NA	NA	7	8	NA	2	11	8	8	2	0	5	5	NA	NA	NA	NA	3300	NA	1.5	2200	3	1
530	143146187306111	4	1	58	5	5	6	2	54431	5	3	1	7	54	3	2	2	15	1	1	1	15	4	4	4	3	1	NA	2	2	2	2	8	6	5	5	0	4	4	NA	NA	NA	2800	NA	NA	3	933.333333333333	5	1
531	143146187307008	4	1	34	3	3	4	1	91021	9	5	3	7	91	1	1	1	12	8	7	1	11	4	4	4	5	2	2	3	5	4	2	11	8	8	1	NA	3	3	NA	NA	1999	NA	NA	NA	1	1999	3	3
532	143146187374593	4	1	62	5	5	7	2	75117	9	5	1	11	75	1	1	1	12	8	7	3	9	7	7	7	NA	NA	NA	7	8	NA	2	11	8	8	3	0	6	6	NA	NA	NA	NA	NA	18000	2	9000	1	1
533	143146187500555	4	2	73	6	6	8	4	12159	1	1	6	1	12	7	4	2	16	9	8	3	5	7	7	7	NA	NA	NA	7	8	NA	2	11	8	8	2	0	5	5	NA	NA	NA	NA	3450	NA	1.5	2300	3	1
534	143146187506701	4	1	77	7	6	8	2	73008	7	4	1	8	73	8	5	2	22	3	3	3	9	7	7	7	NA	NA	NA	7	8	NA	2	11	8	8	2	0	6	6	NA	NA	NA	NA	NA	4600	1.5	3066.66666666667	2	1
535	143146187506702	4	2	70	6	6	8	4	85017	1	1	6	3	85	6	3	2	18	12	11	3	6	7	7	7	NA	NA	NA	7	8	NA	2	5	4	3	2	0	5	5	NA	NA	NA	NA	3100	NA	1.5	2066.66666666667	3	1
536	143146187556880	4	2	33	3	3	4	3	57049	8	4	3	4	57	3	2	2	15	1	1	1	28	6	6	6	3	1	NA	2	2	2	2	9	6	6	1	NA	1	1	999	NA	NA	NA	NA	NA	1	999	5	4
537	143146187719699	4	1	69	6	6	7	2	61391	5	3	3	3	61	5	3	2	4	11	10	3	26	8	7	7	NA	NA	NA	7	8	NA	2	5	4	3	2	0	4	4	NA	NA	NA	2600	NA	NA	1.5	1733.33333333333	4	1
538	143146187779094	4	1	49	4	4	5	2	75112	9	5	1	11	75	1	1	1	12	8	7	1	6	3	3	3	5	2	2	3	5	4	2	11	8	8	1	NA	4	4	NA	NA	NA	2800	NA	NA	1	2800	2	2
539	143146187873308	4	2	63	5	5	7	4	59512	8	4	4	10	59	2	2	2	17	10	9	3	18	8	7	7	NA	NA	NA	7	8	NA	2	6	5	4	2	0	6	6	NA	NA	NA	NA	NA	4200	1.5	2800	2	1
540	143146187996195	4	2	72	6	6	8	4	29042	3	2	5	5	29	6	3	2	6	5	5	3	22	8	7	7	NA	NA	NA	7	8	NA	2	6	5	4	2	0	4	4	NA	NA	NA	2150	NA	NA	1.5	1433.33333333333	4	1
541	143146188171308	4	2	54	5	5	6	4	62516	8	4	4	7	62	2	2	2	17	10	9	1	20	5	5	5	3	1	NA	2	2	2	2	10	7	7	4	0	3	3	NA	NA	1800	NA	NA	NA	2.5	720	6	1
542	143146188178478	4	1	66	6	6	7	2	64545	8	4	3	6	64	7	4	2	2	2	2	3	23	8	7	7	NA	NA	NA	7	8	NA	2	6	5	4	2	0	5	5	NA	NA	NA	NA	3400	NA	1.5	2266.66666666667	3	1
543	143146188179503	4	1	65	6	6	7	2	30189	7	4	1	11	30	9	5	2	13	9	8	3	14	7	7	7	NA	NA	NA	7	8	NA	2	11	8	8	1	NA	3	3	NA	NA	1920	NA	NA	NA	1	1920	3	3
544	143146188184624	4	2	30	3	3	4	3	15083	1	1	6	3	15	8	5	2	3	3	3	1	22	5	5	5	4	2	NA	2	3	3	2	5	4	3	5	3	3	3	NA	NA	1999	NA	NA	NA	2.4	832.916666666667	6	1
545	143146188281912	4	2	65	6	6	7	4	31555	8	4	1	11	31	7	4	2	16	9	8	3	12	7	7	7	NA	NA	NA	7	8	NA	2	10	7	7	1	NA	3	3	NA	NA	1600	NA	NA	NA	1	1600	4	3
546	143146188284985	4	2	55	5	5	6	4	14118	7	4	1	11	14	5	3	2	4	11	10	1	18	5	5	5	5	2	2	3	5	4	2	8	6	5	2	0	6	6	NA	NA	NA	NA	NA	5100	1.5	3400	1	1
547	143146188292154	4	2	54	5	5	6	4	18213	6	3	4	5	18	5	3	2	7	6	6	6	20	8	7	8	NA	NA	NA	8	8	NA	2	9	6	6	3	0	4	4	NA	NA	NA	2600	NA	NA	2	1300	5	1
548	143146188295227	4	1	61	5	5	7	2	13062	8	4	2	4	13	9	5	2	21	13	12	6	18	8	7	8	NA	NA	NA	8	8	NA	2	4	3	2	2	0	3	3	NA	NA	1900	NA	NA	NA	1.5	1266.66666666667	5	1
549	143146188298300	4	2	34	3	3	4	3	78481	9	5	2	7	78	1	1	1	12	8	7	1	15	4	4	4	3	1	NA	2	2	2	2	10	7	7	2	0	6	6	NA	NA	NA	NA	NA	5900	1.5	3933.33333333333	1	1
550	143146188303422	4	2	62	5	5	7	4	59588	7	4	3	5	59	2	2	2	17	10	9	3	14	7	7	7	NA	NA	NA	7	8	NA	2	10	7	7	2	0	5	5	NA	NA	NA	NA	3300	NA	1.5	2200	3	1
551	143146188356678	4	1	28	3	3	3	1	74286	1	1	6	1	74	8	5	2	22	3	3	1	2	2	2	2	1	3	NA	1	1	1	2	9	6	6	4	2	2	2	NA	1100	NA	NA	NA	NA	2.1	523.809523809524	6	1
552	143146188546128	4	1	44	4	4	5	2	31091	8	4	3	5	31	7	4	2	16	9	8	1	23	6	6	6	3	1	NA	2	2	2	2	7	5	4	3	1	5	5	NA	NA	NA	NA	3100	NA	1.8	1722.22222222222	4	1
553	143146188588113	4	2	71	6	6	8	4	70240	1	1	6	2	70	3	2	2	10	4	4	3	27	8	7	7	NA	NA	NA	7	8	NA	2	4	3	2	2	0	3	3	NA	NA	1990	NA	NA	NA	1.5	1326.66666666667	4	1
554	143146188593234	4	2	29	3	3	3	3	2145	1	1	6	1	2	4	2	2	19	10	9	1	21	5	5	5	3	1	NA	2	2	2	2	8	6	5	4	2	4	4	NA	NA	NA	2750	NA	NA	2.1	1309.52380952381	5	1
555	143146188761180	4	1	66	6	6	7	2	6123	8	4	3	8	6	9	5	2	21	13	12	3	9	7	7	7	NA	NA	NA	7	8	NA	2	11	8	8	2	0	5	5	NA	NA	NA	NA	3200	NA	1.5	2133.33333333333	3	1
556	143146188781666	4	1	24	2	2	3	1	78575	9	5	2	5	78	1	1	1	12	8	7	5	NA	9	8	8	NA	NA	NA	6	8	NA	1	11	1	8	3	1	7	7	NA	NA	NA	NA	NA	NA	NA	NA	NA	1
557	143146188791908	4	2	25	3	3	3	3	12270	2	2	5	4	12	7	4	2	16	9	8	1	30	10	8	8	1	3	NA	1	1	1	2	1	2	1	1	NA	1	1	3	NA	NA	NA	NA	NA	1	3	6	4
558	143146188797029	4	2	36	4	4	4	4	13073	8	4	2	5	13	9	5	2	21	13	12	1	12	4	4	4	4	2	NA	2	3	3	2	8	6	5	4	2	4	4	NA	NA	NA	2800	NA	NA	2.1	1333.33333333333	4	1
559	143146188964982	4	2	37	4	4	4	4	56108	1	1	6	2	56	6	3	2	6	5	5	2	12	4	4	4	3	1	NA	5	7	5	2	10	7	7	4	2	5	5	NA	NA	NA	NA	3800	NA	2.1	1809.52380952381	4	1
560	143146189110280	4	2	40	4	4	5	4	75115	9	5	1	11	75	1	1	1	12	8	7	1	21	5	5	5	3	1	NA	2	2	2	2	9	6	6	5	3	3	3	NA	NA	1950	NA	NA	NA	2.4	812.5	6	1
561	143146189118476	4	1	46	4	4	5	2	88516	3	2	5	5	88	3	2	2	15	1	1	1	10	3	3	3	3	1	NA	2	2	2	2	11	8	8	4	1	6	6	NA	NA	NA	NA	NA	7500	2.3	3260.86956521739	1	1
562	143146189121549	4	2	48	4	4	5	4	84141	8	4	3	7	84	9	5	2	21	13	12	7	21	8	7	8	NA	NA	NA	8	8	NA	2	7	5	4	3	0	2	2	NA	1490	NA	NA	NA	NA	2	745	6	3
563	143146189152278	4	1	34	3	3	4	1	75111	9	5	1	11	75	1	1	1	12	8	7	1	10	3	3	3	3	1	NA	2	2	2	2	11	8	8	1	NA	5	5	NA	NA	NA	NA	3400	NA	1	3400	1	4
564	143146189177884	4	2	44	4	4	5	4	13005	8	4	4	9	13	9	5	2	21	13	12	1	16	4	4	4	3	1	NA	2	2	2	1	10	1	7	4	2	6	6	NA	NA	NA	NA	NA	5200	2.1	2476.19047619048	2	1
565	143146189186078	4	1	28	3	3	3	1	44109	8	4	1	11	44	6	3	2	18	12	11	1	18	5	5	5	3	1	NA	2	2	2	2	9	6	6	4	1	3	3	NA	NA	1700	NA	NA	NA	2.3	739.130434782609	6	1
566	143146189673513	4	2	65	6	6	7	4	72220	1	1	6	1	72	6	3	2	18	12	11	3	20	8	7	7	NA	NA	NA	7	8	NA	2	8	6	5	2	0	5	5	NA	NA	NA	NA	3500	NA	1.5	2333.33333333333	3	1
567	143146189795371	4	1	44	4	4	5	2	62193	7	4	1	10	62	2	2	2	17	10	9	1	17	4	4	4	5	2	3	3	4	4	2	8	6	5	1	NA	7	7	NA	NA	NA	NA	NA	NA	NA	NA	NA	1
568	143146190079029	4	2	44	4	4	5	4	33046	1	1	6	2	33	7	4	2	2	2	2	2	20	5	5	5	8	2	NA	5	7	5	2	9	6	6	2	0	7	7	NA	NA	NA	NA	NA	NA	NA	NA	NA	1
569	143146190448711	4	1	65	6	6	7	2	62826	5	3	2	4	62	2	2	2	17	10	9	3	2	7	7	7	NA	NA	NA	7	8	NA	2	10	7	7	2	0	5	5	NA	NA	NA	NA	3990	NA	1.5	2660	2	3
570	143146192890969	4	1	23	2	2	3	1	59286	8	4	4	7	59	2	2	2	17	10	9	1	20	5	5	5	3	1	NA	2	2	2	2	9	6	6	2	0	2	2	NA	1100	NA	NA	NA	NA	1.5	733.333333333333	6	1
571	143146193472619	4	2	67	6	6	7	4	87085	7	4	1	11	87	7	4	2	14	2	2	3	14	7	7	7	NA	NA	NA	7	8	NA	2	6	5	4	2	0	7	7	NA	NA	NA	NA	NA	NA	NA	NA	NA	1
572	143146193810536	4	2	49	4	4	5	4	45191	3	2	1	5	45	5	3	2	7	6	6	7	21	8	7	8	NA	NA	NA	8	8	NA	2	6	5	4	2	0	2	2	NA	1020	NA	NA	NA	NA	1.5	680	6	3
573	143146194480240	4	2	28	3	3	3	3	90033	4	2	1	5	90	3	2	2	10	4	4	7	27	8	7	8	NA	NA	NA	8	8	NA	2	8	6	5	2	0	4	4	NA	NA	NA	2999	NA	NA	1.5	1999.33333333333	3	1
574	143146194591826	4	2	40	4	4	5	4	13212	8	4	1	11	13	9	5	2	21	13	12	1	9	3	3	3	3	1	NA	2	2	2	2	5	4	3	1	NA	2	2	NA	1200	NA	NA	NA	NA	1	1200	5	3
575	143146194617440	4	2	52	5	5	6	4	92077	9	5	2	7	92	1	1	1	12	8	7	1	9	3	3	3	1	3	NA	1	1	1	2	11	8	8	1	NA	4	4	NA	NA	NA	2800	NA	NA	1	2800	2	2
576	143146194633836	4	2	38	4	4	4	4	33453	1	1	6	1	33	7	4	2	2	2	2	1	18	5	5	5	4	2	NA	2	3	3	1	6	1	4	5	2	4	4	NA	NA	NA	2500	NA	NA	2.6	961.538461538462	5	1
577	143146194642037	4	2	18	2	2	2	3	67392	1	1	6	1	67	3	2	2	1	1	1	5	NA	9	8	8	NA	NA	NA	6	8	NA	1	3	1	1	4	0	6	6	NA	NA	NA	NA	NA	42000	2.5	16800	1	3
578	143146194650117	4	2	18	2	2	2	3	53077	2	2	5	3	53	6	3	2	18	12	11	4	NA	10	8	8	NA	NA	NA	5	8	5	2	9	6	6	5	2	3	3	NA	NA	1700	NA	NA	NA	2.6	653.846153846154	6	4
579	143148840742995	4	1	50	5	5	6	2	59462	2	2	5	4	59	2	2	2	17	10	9	1	10	3	3	3	3	1	NA	2	2	2	2	11	8	8	4	0	6	6	NA	NA	NA	NA	NA	5500	2.5	2200	3	1
580	143148840885334	4	1	50	5	5	6	2	44030	2	2	5	4	44	6	3	2	18	12	11	1	15	4	4	4	3	1	NA	2	2	2	2	10	7	7	5	0	4	4	NA	NA	NA	2500	NA	NA	3	833.333333333333	6	1
581	143148840974423	4	2	70	6	6	8	4	35037	3	2	5	5	35	6	3	2	6	5	5	3	11	7	7	7	NA	NA	NA	7	8	NA	2	8	6	5	2	0	5	5	NA	NA	NA	NA	3900	NA	1.5	2600	2	1
582	143148840981593	4	2	78	7	6	8	4	35238	8	4	1	11	35	6	3	2	6	5	5	3	18	8	7	7	NA	NA	NA	7	8	NA	2	8	6	5	2	0	4	4	NA	NA	NA	2300	NA	NA	1.5	1533.33333333333	4	1
583	143148841014368	4	1	77	7	6	8	2	69244	8	4	2	8	69	8	5	2	22	3	3	3	17	7	7	7	NA	NA	NA	7	8	NA	2	4	3	2	1	NA	3	3	NA	NA	1980	NA	NA	NA	1	1980	3	3
584	143148841049190	4	1	55	5	5	6	2	62119	8	4	1	8	62	2	2	2	17	10	9	6	18	8	7	8	NA	NA	NA	8	8	NA	2	7	5	4	2	0	2	2	NA	1350	NA	NA	NA	NA	1.5	900	5	1
585	143148841131127	4	2	76	7	6	8	4	83115	4	2	1	7	83	9	5	2	21	13	12	3	15	7	7	7	NA	NA	NA	7	8	NA	2	11	8	8	2	0	5	5	NA	NA	NA	NA	3890	NA	1.5	2593.33333333333	2	1
586	143148841141368	4	1	72	6	6	8	2	40053	1	1	6	1	40	7	4	2	2	2	2	3	3	7	7	7	NA	NA	NA	7	8	NA	2	10	7	7	2	0	6	6	NA	NA	NA	NA	NA	4400	1.5	2933.33333333333	2	1
587	143148841167872	4	1	75	7	6	8	2	59599	8	4	4	10	59	2	2	2	17	10	9	3	15	7	7	7	NA	NA	NA	7	8	NA	2	9	6	6	1	NA	4	4	NA	NA	NA	2100	NA	NA	1	2100	3	3
588	143148841204742	4	2	72	6	6	8	4	32022	1	1	6	1	32	7	4	2	16	9	8	3	12	7	7	7	NA	NA	NA	7	8	NA	2	8	6	5	2	0	4	4	NA	NA	NA	2300	NA	NA	1.5	1533.33333333333	4	3
589	143148841218056	4	1	51	5	5	6	2	83012	2	2	5	3	83	9	5	2	21	13	12	1	3	2	2	2	1	3	NA	1	1	1	2	9	6	6	2	0	3	3	NA	NA	1980	NA	NA	NA	1.5	1320	4	1
590	143148841267221	4	2	56	5	5	6	4	76351	8	4	1	11	76	5	3	2	11	11	10	1	25	6	6	6	3	1	NA	2	2	2	2	6	5	4	2	0	5	5	NA	NA	NA	NA	3800	NA	1.5	2533.33333333333	2	1
591	143148841315355	4	1	80	7	6	8	2	69388	8	4	1	11	69	8	5	2	22	3	3	3	7	7	7	7	NA	NA	NA	7	8	NA	2	11	8	8	2	0	6	6	NA	NA	NA	NA	NA	4100	1.5	2733.33333333333	2	1
592	143148841317404	4	2	54	5	5	6	4	78490	9	5	3	9	78	1	1	1	12	8	7	7	20	8	7	8	NA	NA	NA	8	8	NA	2	8	6	5	1	NA	1	1	900	NA	NA	NA	NA	NA	1	900	5	4
593	143148841354272	4	1	65	6	6	7	2	93045	9	5	3	8	93	1	1	1	12	8	7	3	16	7	7	7	NA	NA	NA	7	8	NA	2	8	6	5	1	NA	4	4	NA	NA	NA	2000	NA	NA	1	2000	3	3
594	143148841375780	4	1	65	6	6	7	2	92012	9	5	2	11	92	1	1	1	12	8	7	3	10	7	7	7	NA	NA	NA	7	8	NA	2	11	8	8	3	0	6	6	NA	NA	NA	NA	NA	7000	2	3500	1	1
595	143148841383973	4	1	79	7	6	8	2	47104	1	1	6	1	47	7	4	2	2	2	2	3	4	7	7	7	NA	NA	NA	7	8	NA	2	11	8	8	2	0	6	6	NA	NA	NA	NA	NA	5500	1.5	3666.66666666667	1	1
596	143148841405479	4	1	56	5	5	6	2	84003	4	2	1	7	84	9	5	2	21	13	12	2	26	6	6	6	3	1	NA	5	7	5	2	6	5	4	1	NA	2	2	NA	1200	NA	NA	NA	NA	1	1200	5	3
597	143148841430068	4	2	68	6	6	7	4	54395	8	4	1	11	54	3	2	2	15	1	1	3	6	7	7	7	NA	NA	NA	7	8	NA	2	11	8	8	1	NA	4	4	NA	NA	NA	2600	NA	NA	1	2600	2	3
598	143148841491519	4	1	73	6	6	8	2	95607	9	5	3	8	95	1	1	1	12	8	7	3	17	7	7	7	NA	NA	NA	7	8	NA	2	6	5	4	2	0	5	5	NA	NA	NA	NA	3500	NA	1.5	2333.33333333333	3	1
599	143148841497664	4	1	80	7	6	8	2	78397	9	5	2	5	78	1	1	1	12	8	7	3	9	7	7	7	NA	NA	NA	7	8	NA	2	8	6	5	2	0	6	6	NA	NA	NA	NA	NA	4000	1.5	2666.66666666667	2	1
600	143148841532482	4	1	77	7	6	8	2	69227	2	2	5	4	69	8	5	2	22	3	3	3	10	7	7	7	NA	NA	NA	7	8	NA	2	11	8	8	2	0	6	6	NA	NA	NA	NA	NA	7500	1.5	5000	1	1
601	143148841591880	4	2	70	6	6	8	4	34172	8	4	1	11	34	9	5	2	13	9	8	3	20	8	7	7	NA	NA	NA	7	8	NA	2	8	6	5	2	0	7	7	NA	NA	NA	NA	NA	NA	NA	NA	NA	1
602	143148841673815	4	1	69	6	6	7	2	91552	9	5	3	7	91	1	1	1	12	8	7	3	10	7	7	7	NA	NA	NA	7	8	NA	2	5	4	3	2	0	4	4	NA	NA	NA	2500	NA	NA	1.5	1666.66666666667	4	1
603	143148841731162	4	2	38	4	4	4	4	57463	8	4	1	11	57	3	2	2	15	1	1	1	24	6	6	6	9	1	NA	2	2	2	2	7	5	4	2	1	2	2	NA	1100	NA	NA	NA	NA	1.3	846.153846153846	6	3
604	143148841732187	4	1	56	5	5	6	2	77210	2	2	5	3	77	1	1	1	12	8	7	1	25	6	6	6	3	1	NA	2	2	2	2	6	5	4	1	NA	4	4	NA	NA	NA	2200	NA	NA	1	2200	3	4
605	143148841784416	4	1	75	7	6	8	2	35228	5	3	1	5	35	6	3	2	6	5	5	3	10	7	7	7	NA	NA	NA	7	8	NA	2	10	7	7	1	NA	4	4	NA	NA	NA	2400	NA	NA	1	2400	3	3
606	143148841794659	4	1	70	6	6	8	2	66136	8	4	1	11	66	9	5	2	13	9	8	3	14	7	7	7	NA	NA	NA	7	8	NA	2	6	5	4	1	NA	2	2	NA	1330	NA	NA	NA	NA	1	1330	4	3
607	143148841804902	4	2	70	6	6	8	4	38179	8	4	2	5	38	8	5	2	22	3	3	3	7	7	7	7	NA	NA	NA	7	8	NA	2	11	8	8	1	NA	6	6	NA	NA	NA	NA	NA	4250	1	4250	1	3
608	143148841818221	4	2	77	7	6	8	4	28018	1	1	6	2	28	5	3	2	7	6	6	3	20	8	7	7	NA	NA	NA	7	8	NA	2	4	3	2	1	NA	3	3	NA	NA	1882	NA	NA	NA	1	1882	3	3
609	143148841849969	4	2	45	4	4	5	4	40283	5	3	3	3	40	7	4	2	2	2	2	6	30	10	7	8	NA	NA	NA	8	8	NA	2	6	5	4	4	0	1	1	900	NA	NA	NA	NA	NA	2.5	360	6	1
610	143148841850994	4	1	75	7	6	8	2	78586	9	5	3	10	78	1	1	1	12	8	7	3	10	7	7	7	NA	NA	NA	7	8	NA	2	11	8	8	2	0	6	6	NA	NA	NA	NA	NA	5800	1.5	3866.66666666667	1	1
611	143148841854067	4	1	76	7	6	8	2	45208	6	3	1	7	45	5	3	2	7	6	6	3	5	7	7	7	NA	NA	NA	7	8	NA	2	11	8	8	2	0	6	6	NA	NA	NA	NA	NA	4500	1.5	3000	2	1
612	143148841970805	4	2	54	5	5	6	4	21231	8	4	1	11	21	4	2	2	5	4	4	1	2	2	2	2	1	3	NA	1	1	1	2	11	8	8	2	0	1	1	0	NA	NA	NA	NA	NA	1.5	0	6	1
613	143148841980023	4	1	82	7	6	8	2	33063	8	4	1	11	33	7	4	2	2	2	2	3	9	7	7	7	NA	NA	NA	7	8	NA	2	7	5	4	2	0	6	6	NA	NA	NA	NA	NA	5000	1.5	3333.33333333333	1	1
614	143148842076169	4	2	75	7	6	8	4	41072	1	1	6	1	41	5	3	2	7	6	6	3	7	7	7	7	NA	NA	NA	7	8	NA	2	11	8	8	2	0	7	7	NA	NA	NA	NA	NA	NA	NA	NA	NA	1
615	143148842082315	4	2	50	5	5	6	4	44109	8	4	1	11	44	6	3	2	18	12	11	1	20	5	5	5	3	1	NA	2	2	2	2	11	8	8	1	NA	3	3	NA	NA	1900	NA	NA	NA	1	1900	3	3
616	143148842092560	4	1	30	3	3	4	1	77317	2	2	5	4	77	1	1	1	12	8	7	1	6	3	3	3	5	2	2	3	5	4	2	11	8	8	2	0	5	5	NA	NA	NA	NA	3302	NA	1.5	2201.33333333333	3	1
617	143148842157090	4	2	74	6	6	8	4	40088	5	3	1	8	40	7	4	2	2	2	2	3	4	7	7	7	NA	NA	NA	7	8	NA	2	10	7	7	2	0	7	7	NA	NA	NA	NA	NA	NA	NA	NA	NA	1
618	143148842180650	4	2	75	7	6	8	4	74010	7	4	1	11	74	8	5	2	22	3	3	3	15	7	7	7	NA	NA	NA	7	8	NA	2	9	6	6	2	0	7	7	NA	NA	NA	NA	NA	NA	NA	NA	NA	1
619	143148842210354	4	2	76	7	6	8	4	29171	5	3	1	4	29	6	3	2	6	5	5	3	5	7	7	7	NA	NA	NA	7	8	NA	2	10	7	7	2	0	5	5	NA	NA	NA	NA	3200	NA	1.5	2133.33333333333	3	1
620	143148842227766	4	2	40	4	4	5	4	91659	9	5	2	5	91	1	1	1	12	8	7	6	21	8	7	8	NA	NA	NA	8	8	NA	2	6	5	4	4	2	3	3	NA	NA	1550	NA	NA	NA	2.1	738.095238095238	6	1
621	143148842268735	4	1	48	4	4	5	2	91589	9	5	2	9	91	1	1	1	12	8	7	1	15	4	4	4	4	2	NA	2	3	3	2	7	5	4	2	0	5	5	NA	NA	NA	NA	3500	NA	1.5	2333.33333333333	3	3
622	143148842273857	4	1	46	4	4	5	2	62812	1	1	6	1	62	2	2	2	17	10	9	1	24	6	6	6	3	1	NA	2	2	2	2	9	6	6	4	0	4	4	NA	NA	NA	2999	NA	NA	2.5	1199.6	5	1
623	143148842304588	4	1	73	6	6	8	2	57534	2	2	1	2	57	3	2	2	15	1	1	3	6	7	7	7	NA	NA	NA	7	8	NA	2	11	8	8	2	0	5	5	NA	NA	NA	NA	3300	NA	1.5	2200	3	1
624	143148842324049	4	1	84	7	6	8	2	56260	6	3	1	10	56	6	3	2	6	5	5	3	9	7	7	7	NA	NA	NA	7	8	NA	2	11	8	8	2	0	5	5	NA	NA	NA	NA	3999	NA	1.5	2666	2	1
625	143148842338389	4	2	76	7	6	8	4	69259	8	4	4	10	69	8	5	2	22	3	3	3	12	7	7	7	NA	NA	NA	7	8	NA	2	10	7	7	2	0	5	5	NA	NA	NA	NA	3500	NA	1.5	2333.33333333333	3	1
626	143148842351706	4	2	65	6	6	7	4	14431	3	2	5	6	14	5	3	2	4	11	10	3	21	8	7	7	NA	NA	NA	7	8	NA	2	5	4	3	2	0	7	7	NA	NA	NA	NA	NA	NA	NA	NA	NA	1
627	143148842403938	4	2	74	6	6	8	4	21412	1	1	6	2	21	4	2	2	5	4	4	3	9	7	7	7	NA	NA	NA	7	8	NA	2	7	5	4	1	NA	4	4	NA	NA	NA	2450	NA	NA	1	2450	3	3
628	143148842409062	4	1	33	3	3	4	1	77307	9	5	2	7	77	1	1	1	12	8	7	1	16	4	4	4	3	1	NA	2	2	2	2	8	6	5	2	0	6	6	NA	NA	NA	NA	NA	4200	1.5	2800	2	1
629	143148842454126	4	2	75	7	6	8	4	71497	5	3	2	2	71	4	2	2	5	4	4	3	6	7	7	7	NA	NA	NA	7	8	NA	2	8	6	5	1	NA	4	4	NA	NA	NA	2700	NA	NA	1	2700	2	3
630	143148842488950	4	2	75	7	6	8	4	34172	8	4	1	11	34	9	5	2	13	9	8	3	7	7	7	7	NA	NA	NA	7	8	NA	2	11	8	8	1	NA	3	3	NA	NA	1800	NA	NA	NA	1	1800	4	3
631	143148842508411	4	1	74	6	6	8	2	13001	8	4	3	11	13	9	5	2	21	13	12	3	14	7	7	7	NA	NA	NA	7	8	NA	2	8	6	5	2	0	4	4	NA	NA	NA	2500	NA	NA	1.5	1666.66666666667	4	1
632	143148842520701	4	2	83	7	6	8	4	45208	6	3	1	7	45	5	3	2	7	6	6	3	14	7	7	7	NA	NA	NA	7	8	NA	2	6	5	4	2	0	4	4	NA	NA	NA	2875	NA	NA	1.5	1916.66666666667	3	1
633	143148842520703	4	1	77	7	6	8	2	38111	8	4	2	5	38	8	5	2	22	3	3	3	10	7	7	7	NA	NA	NA	7	8	NA	2	10	7	7	2	0	5	5	NA	NA	NA	NA	3900	NA	1.5	2600	2	1
634	143148842530820	4	1	48	4	4	5	2	67482	8	4	1	11	67	3	2	2	1	1	1	1	5	3	3	3	7	2	2	3	5	4	2	11	8	8	3	0	4	4	NA	NA	NA	2800	NA	NA	2	1400	4	1
635	143148842566667	4	2	42	4	4	5	4	3052	1	1	6	2	3	8	5	2	3	3	3	1	15	4	4	4	3	1	NA	2	2	2	2	11	8	8	4	2	7	7	NA	NA	NA	NA	NA	NA	NA	NA	NA	1
636	143148842584078	4	1	75	7	6	8	2	65243	1	1	6	1	65	7	4	2	16	9	8	3	7	7	7	7	NA	NA	NA	7	8	NA	2	10	7	7	2	0	4	4	NA	NA	NA	2580	NA	NA	1.5	1720	4	1
637	143148842588176	4	2	78	7	6	8	4	83061	6	3	1	10	83	9	5	2	21	13	12	3	22	8	7	7	NA	NA	NA	7	8	NA	2	6	5	4	1	NA	1	1	600	NA	NA	NA	NA	NA	1	600	6	3
638	143148842592273	4	2	62	5	5	7	4	37261	8	4	1	11	37	5	3	2	7	6	6	3	3	7	7	7	NA	NA	NA	7	8	NA	2	9	6	6	2	0	7	7	NA	NA	NA	NA	NA	NA	NA	NA	NA	1
639	143148842596370	4	2	83	7	6	8	4	40046	4	2	5	7	40	7	4	2	2	2	2	3	20	8	7	7	NA	NA	NA	7	8	NA	2	9	6	6	2	0	5	5	NA	NA	NA	NA	3100	NA	1.5	2066.66666666667	3	1
640	143148842611734	4	2	33	3	3	4	3	74243	7	4	2	7	74	8	5	2	22	3	3	1	12	4	4	4	3	1	NA	2	2	2	2	10	7	7	4	2	7	7	NA	NA	NA	NA	NA	NA	NA	NA	NA	1
641	143148842629145	4	1	41	4	4	5	2	4112	5	3	1	8	4	9	5	2	21	13	12	1	2	2	2	2	2	4	NA	2	1	1	2	10	7	7	4	1	4	4	NA	NA	NA	2400	NA	NA	2.3	1043.47826086957	5	1
642	143148842656799	4	2	68	6	6	7	4	11262	6	3	5	10	11	9	5	2	13	9	8	3	15	7	7	7	NA	NA	NA	7	8	NA	2	6	5	4	2	0	5	5	NA	NA	NA	NA	3100	NA	1.5	2066.66666666667	3	1
643	143148842657824	4	2	53	5	5	6	4	11088	5	3	3	2	11	9	5	2	13	9	8	1	15	4	4	4	3	1	NA	2	2	2	2	10	7	7	1	NA	4	4	NA	NA	NA	2600	NA	NA	1	2600	2	4
644	143148842664995	4	2	33	3	3	4	3	68166	8	4	3	7	68	3	2	2	1	1	1	1	15	4	4	4	3	1	NA	2	2	2	2	11	8	8	1	NA	2	2	NA	1400	NA	NA	NA	NA	1	1400	4	3
645	143148842675237	4	2	54	5	5	6	4	26144	1	1	6	2	26	8	5	2	22	3	3	1	27	6	6	6	3	1	NA	2	2	2	2	6	5	4	1	NA	1	1	700	NA	NA	NA	NA	NA	1	700	6	3
646	143148842684456	4	2	34	3	3	4	3	70388	5	3	4	2	70	3	2	2	10	4	4	1	23	6	6	6	3	1	NA	2	2	2	2	8	6	5	3	1	4	4	NA	NA	NA	2500	NA	NA	1.8	1388.88888888889	4	1
647	143148842684457	4	1	76	7	6	8	2	59295	5	3	1	8	59	2	2	2	17	10	9	3	9	7	7	7	NA	NA	NA	7	8	NA	2	5	4	3	3	0	7	7	NA	NA	NA	NA	NA	NA	NA	NA	NA	1
648	143148842753079	4	1	44	4	4	5	2	1202	3	2	1	5	1	8	5	2	22	3	3	1	10	3	3	3	3	1	NA	2	2	2	2	10	7	7	4	2	5	5	NA	NA	NA	NA	3500	NA	2.1	1666.66666666667	4	1
649	143148842777657	4	1	77	7	6	8	2	33138	4	2	1	5	33	7	4	2	2	2	2	3	16	7	7	7	NA	NA	NA	7	8	NA	2	3	2	1	2	0	4	4	NA	NA	NA	2999	NA	NA	1.5	1999.33333333333	3	1
650	143148842798142	4	2	70	6	6	8	4	29300	1	1	6	2	29	6	3	2	6	5	5	3	20	8	7	7	NA	NA	NA	7	8	NA	2	10	7	7	2	0	6	6	NA	NA	NA	NA	NA	5500	1.5	3666.66666666667	1	1
651	143148842887259	4	1	50	5	5	6	2	78586	9	5	3	10	78	1	1	1	12	8	7	1	20	5	5	5	3	1	NA	2	2	2	2	7	5	4	2	0	3	3	NA	NA	1600	NA	NA	NA	1.5	1066.66666666667	5	1
652	143148842897501	4	2	68	6	6	7	4	60155	2	2	1	4	60	4	2	2	19	10	9	3	12	7	7	7	NA	NA	NA	7	8	NA	2	10	7	7	2	0	6	6	NA	NA	NA	NA	NA	4200	1.5	2800	2	1
653	143148842929260	4	1	55	5	5	6	2	95176	9	5	2	8	95	1	1	1	12	8	7	1	26	6	6	6	3	1	NA	2	2	2	2	6	5	4	2	0	3	3	NA	NA	1850	NA	NA	NA	1.5	1233.33333333333	5	1
654	143148842969204	4	2	80	7	6	8	4	84007	8	4	1	10	84	9	5	2	21	13	12	3	7	7	7	7	NA	NA	NA	7	8	NA	2	10	7	7	1	NA	7	7	NA	NA	NA	NA	NA	NA	NA	NA	NA	3
655	143148843000956	4	2	46	4	4	5	4	59599	8	4	4	10	59	2	2	2	17	10	9	1	6	3	3	3	6	2	2	3	5	4	2	10	7	7	3	1	6	6	NA	NA	NA	NA	NA	4200	1.8	2333.33333333333	3	1
656	143148843023363	4	2	46	4	4	5	4	41256	1	1	6	2	41	5	3	2	7	6	6	1	15	4	4	4	3	1	NA	2	2	2	2	10	7	7	4	1	6	6	NA	NA	NA	NA	NA	4050	2.3	1760.86956521739	4	1
657	143148843035654	4	2	76	7	6	8	4	69287	4	2	1	5	69	8	5	2	22	3	3	3	18	8	7	7	NA	NA	NA	7	8	NA	2	4	3	2	2	0	4	4	NA	NA	NA	2800	NA	NA	1.5	1866.66666666667	3	1
658	143148843048971	4	2	75	7	6	8	4	25527	2	2	5	4	25	3	2	2	10	4	4	3	20	8	7	7	NA	NA	NA	7	8	NA	2	7	5	4	2	0	4	4	NA	NA	NA	2350	NA	NA	1.5	1566.66666666667	4	1
659	143148843053071	4	2	76	7	6	8	4	50516	4	2	3	12	50	5	3	2	4	11	10	3	12	7	7	7	NA	NA	NA	7	8	NA	2	10	7	7	2	0	6	6	NA	NA	NA	NA	NA	4350	1.5	2900	2	1
660	143148843065366	4	2	50	5	5	6	4	44184	7	4	1	10	44	6	3	2	18	12	11	6	18	8	7	8	NA	NA	NA	8	8	NA	2	6	5	4	2	0	3	3	NA	NA	1990	NA	NA	NA	1.5	1326.66666666667	4	1
661	143148843066391	4	2	77	7	6	8	4	3310	6	3	1	8	3	8	5	2	3	3	3	3	7	7	7	7	NA	NA	NA	7	8	NA	2	11	8	8	1	NA	7	7	NA	NA	NA	NA	NA	NA	NA	NA	NA	3
662	143148843069465	4	2	78	7	6	8	4	12096	3	2	1	4	12	7	4	2	16	9	8	3	20	8	7	7	NA	NA	NA	7	8	NA	2	10	7	7	2	0	7	7	NA	NA	NA	NA	NA	NA	NA	NA	NA	1
663	143148843118627	4	2	77	7	6	8	4	64024	8	4	1	9	64	7	4	2	2	2	2	3	17	7	7	7	NA	NA	NA	7	8	NA	2	5	4	3	1	NA	4	4	NA	NA	NA	2300	NA	NA	1	2300	3	3
664	143148843142186	4	2	37	4	4	4	4	62193	7	4	1	10	62	2	2	2	17	10	9	7	20	8	7	8	NA	NA	NA	8	8	NA	1	5	1	3	2	0	3	3	NA	NA	1998	NA	NA	NA	1.5	1332	4	3
665	143148843205688	4	2	73	6	6	8	4	12263	1	1	6	1	12	7	4	2	16	9	8	3	20	8	7	7	NA	NA	NA	7	8	NA	2	8	6	5	3	0	4	4	NA	NA	NA	2999	NA	NA	2	1499.5	4	1
666	143148843256896	4	1	71	6	6	8	2	44131	4	2	1	7	44	6	3	2	18	12	11	3	9	7	7	7	NA	NA	NA	7	8	NA	2	9	6	6	2	0	5	5	NA	NA	NA	NA	3300	NA	1.5	2200	3	1
667	143148843273282	4	2	46	4	4	5	4	25105	1	1	6	1	25	3	2	2	10	4	4	1	16	4	4	4	5	2	2	3	5	4	2	10	7	7	4	1	5	5	NA	NA	NA	NA	3700	NA	2.3	1608.69565217391	4	1
668	143148843292743	4	2	27	3	3	3	3	86194	7	4	1	10	86	6	3	2	20	2	2	1	11	4	4	4	5	2	2	3	5	4	2	11	8	8	1	NA	3	3	NA	NA	1900	NA	NA	NA	1	1900	3	2
669	143148843300937	4	2	30	3	3	4	3	83150	2	2	5	4	83	9	5	2	21	13	12	1	3	2	2	2	2	4	NA	2	1	1	2	10	7	7	5	0	7	7	NA	NA	NA	NA	NA	NA	NA	NA	NA	1
670	143148843335756	4	2	30	3	3	4	3	54395	8	4	1	11	54	3	2	2	15	1	1	1	12	4	4	4	7	2	2	3	5	4	2	10	7	7	2	0	3	3	NA	NA	1800	NA	NA	NA	1.5	1200	5	1
671	143148843351117	4	2	59	5	5	6	4	78168	9	5	3	4	78	1	1	1	12	8	7	1	14	4	4	4	5	2	2	3	5	4	2	10	7	7	3	0	3	3	NA	NA	1980	NA	NA	NA	2	990	5	1
672	143148843425884	4	2	72	6	6	8	4	40281	5	3	3	6	40	7	4	2	2	2	2	3	17	7	7	7	NA	NA	NA	7	8	NA	2	8	6	5	2	0	6	6	NA	NA	NA	NA	NA	4600	1.5	3066.66666666667	2	1
673	143148843435103	4	1	66	6	6	7	2	30036	7	4	3	3	30	9	5	2	13	9	8	3	6	7	7	7	NA	NA	NA	7	8	NA	2	9	6	6	2	0	5	5	NA	NA	NA	NA	3800	NA	1.5	2533.33333333333	2	1
674	143148843499627	4	2	59	5	5	6	4	2163	3	2	1	3	2	4	2	2	19	10	9	1	16	4	4	4	3	1	NA	2	2	2	2	10	7	7	1	NA	4	4	NA	NA	NA	2400	NA	NA	1	2400	3	4
675	143148843507824	4	2	53	5	5	6	4	46132	1	1	6	1	46	7	4	2	16	9	8	6	20	8	7	8	NA	NA	NA	8	8	NA	2	6	5	4	2	0	3	3	NA	NA	1900	NA	NA	NA	1.5	1266.66666666667	5	2
676	143148843544694	4	1	74	6	6	8	2	14118	7	4	1	11	14	5	3	2	4	11	10	3	9	7	7	7	NA	NA	NA	7	8	NA	2	11	8	8	3	0	5	5	NA	NA	NA	NA	3900	NA	2	1950	3	1
677	143148843573371	4	1	49	4	4	5	2	75109	9	5	1	11	75	1	1	1	12	8	7	6	18	8	7	8	NA	NA	NA	8	8	NA	2	5	4	3	2	0	1	1	785	NA	NA	NA	NA	NA	1.5	523.333333333333	6	1
678	143148843608069	4	2	61	5	5	7	4	85138	1	1	6	2	85	6	3	2	18	12	11	1	23	6	6	6	3	1	NA	2	2	2	2	6	5	4	2	0	4	4	NA	NA	NA	2850	NA	NA	1.5	1900	3	1
679	143148843631635	4	2	64	5	5	7	4	78551	9	5	2	9	78	1	1	1	12	8	7	3	6	7	7	7	NA	NA	NA	7	8	NA	2	11	8	8	3	0	7	7	NA	NA	NA	NA	NA	NA	NA	NA	NA	1
680	143148843638805	4	1	47	4	4	5	2	37261	8	4	1	11	37	5	3	2	7	6	6	1	15	4	4	4	4	2	NA	2	3	3	2	9	6	6	4	0	5	5	NA	NA	NA	NA	3900	NA	2.5	1560	4	1
681	143148843642903	4	2	35	4	4	4	4	93005	9	5	4	10	93	1	1	1	12	8	7	1	10	3	3	3	3	1	NA	2	2	2	2	11	8	8	1	NA	5	5	NA	NA	NA	NA	3300	NA	1	3300	1	4
682	143148843666461	4	1	63	5	5	7	2	1249	8	4	3	6	1	8	5	2	22	3	3	3	17	7	7	7	NA	NA	NA	7	8	NA	2	8	6	5	2	0	5	5	NA	NA	NA	NA	3700	NA	1.5	2466.66666666667	2	1
683	143148843680801	4	2	76	7	6	8	4	78126	9	5	2	8	78	1	1	1	12	8	7	3	11	7	7	7	NA	NA	NA	7	8	NA	2	8	6	5	2	0	7	7	NA	NA	NA	NA	NA	NA	NA	NA	NA	1
684	143148843707434	4	2	76	7	6	8	4	64102	8	4	1	10	64	7	4	2	2	2	2	3	6	7	7	7	NA	NA	NA	7	8	NA	2	11	8	8	2	0	6	6	NA	NA	NA	NA	NA	4500	1.5	3000	2	1
685	143148843708459	4	1	46	4	4	5	2	25056	7	4	1	11	25	3	2	2	10	4	4	1	17	4	4	4	3	1	NA	2	2	2	1	9	1	6	4	1	5	5	NA	NA	NA	NA	3500	NA	2.3	1521.73913043478	4	1
686	143148843718703	4	2	75	7	6	8	4	69387	8	4	1	11	69	8	5	2	22	3	3	3	20	8	7	7	NA	NA	NA	7	8	NA	2	6	5	4	2	0	4	4	NA	NA	NA	2700	NA	NA	1.5	1800	4	1
687	143148843730994	4	2	47	4	4	5	4	62516	8	4	4	7	62	2	2	2	17	10	9	1	28	6	6	6	6	2	1	3	5	4	1	7	1	4	3	2	4	4	NA	NA	NA	2900	NA	NA	1.6	1812.5	4	1
688	143148843754551	4	2	35	4	4	4	4	76108	8	4	2	7	76	5	3	2	11	11	10	2	3	2	2	2	3	1	NA	5	7	5	2	9	6	6	2	0	7	7	NA	NA	NA	NA	NA	NA	NA	NA	NA	1
689	143148843757624	4	1	45	4	4	5	2	59084	1	1	6	3	59	2	2	2	17	10	9	2	26	6	6	6	3	1	NA	5	7	5	2	11	8	8	1	NA	3	3	NA	NA	1700	NA	NA	NA	1	1700	4	4
690	143148843799616	4	2	76	7	6	8	4	64485	2	2	1	2	64	7	4	2	2	2	2	3	20	8	7	7	NA	NA	NA	7	8	NA	2	5	4	3	2	0	3	3	NA	NA	1870	NA	NA	NA	1.5	1246.66666666667	5	1
691	143148843806787	4	2	44	4	4	5	4	45004	6	3	1	7	45	5	3	2	7	6	6	1	26	6	6	6	3	1	NA	2	2	2	2	8	6	5	1	NA	3	3	NA	NA	1590	NA	NA	NA	1	1590	4	4
692	143148843854928	4	2	71	6	6	8	4	34301	6	3	1	9	34	9	5	2	13	9	8	3	14	7	7	7	NA	NA	NA	7	8	NA	2	9	6	6	1	NA	2	2	NA	1100	NA	NA	NA	NA	1	1100	5	4
693	143148843861075	4	1	57	5	5	6	2	69204	8	4	2	8	69	8	5	2	22	3	3	1	3	2	2	2	1	3	NA	1	1	1	2	6	5	4	3	0	5	5	NA	NA	NA	NA	3900	NA	2	1950	3	1
694	143148843863124	4	1	70	6	6	8	2	8097	1	1	6	1	8	4	2	2	8	1	1	3	14	7	7	7	NA	NA	NA	7	8	NA	2	9	6	6	2	0	4	4	NA	NA	NA	2210	NA	NA	1.5	1473.33333333333	4	3
695	143148843872342	4	1	59	5	5	6	2	93078	9	5	4	9	93	1	1	1	12	8	7	1	14	4	4	4	5	2	2	3	5	4	2	10	7	7	3	0	7	7	NA	NA	NA	NA	NA	NA	NA	NA	NA	1
696	143148843910236	4	2	49	4	4	5	4	27022	4	2	1	5	27	5	3	2	11	11	10	1	22	5	5	5	6	2	3	3	4	4	2	10	7	7	1	NA	2	2	NA	1250	NA	NA	NA	NA	1	1250	5	3
697	143148843919455	4	2	30	3	3	4	3	59160	8	4	4	4	59	2	2	2	17	10	9	2	27	6	6	6	3	1	NA	5	7	5	2	10	7	7	2	0	7	7	NA	NA	NA	NA	NA	NA	NA	NA	NA	1
698	143148843923554	4	2	75	7	6	8	4	40040	1	1	6	1	40	7	4	2	2	2	2	3	11	7	7	7	NA	NA	NA	7	8	NA	2	10	7	7	2	0	4	4	NA	NA	NA	2200	NA	NA	1.5	1466.66666666667	4	1
699	143148843955303	4	2	30	3	3	4	3	72089	1	1	6	2	72	6	3	2	18	12	11	1	23	6	6	6	3	1	NA	2	2	2	2	5	4	3	3	1	3	3	NA	NA	1800	NA	NA	NA	1.8	1000	5	1
700	143148843962472	4	2	76	7	6	8	4	44109	8	4	1	11	44	6	3	2	18	12	11	3	5	7	7	7	NA	NA	NA	7	8	NA	2	10	7	7	1	NA	1	1	900	NA	NA	NA	NA	NA	1	900	5	3
701	143148843979886	4	1	30	3	3	4	1	49307	4	2	5	7	49	6	3	2	18	12	11	1	17	4	4	4	3	1	NA	2	2	2	2	7	5	4	2	0	5	5	NA	NA	NA	NA	3500	NA	1.5	2333.33333333333	3	1
702	143148843992178	4	2	66	6	6	7	4	26326	4	2	2	2	26	8	5	2	22	3	3	3	14	7	7	7	NA	NA	NA	7	8	NA	2	5	4	3	2	0	7	7	NA	NA	NA	NA	NA	NA	NA	NA	NA	1
703	143148844040310	4	1	34	3	3	4	1	77285	9	5	4	8	77	1	1	1	12	8	7	1	25	6	6	6	3	1	NA	2	2	2	2	8	6	5	2	0	3	3	NA	NA	1800	NA	NA	NA	1.5	1200	5	1
704	143148844077179	4	1	57	5	5	6	2	1266	2	2	1	3	1	8	5	2	22	3	3	1	23	6	6	6	3	1	NA	2	2	2	2	7	5	4	3	0	4	4	NA	NA	NA	2826	NA	NA	2	1413	4	1
705	143148844113924	4	2	51	5	5	6	4	16099	1	1	6	1	16	6	3	2	20	2	2	1	29	6	6	6	3	1	NA	2	2	2	2	2	2	1	1	NA	2	2	NA	1450	NA	NA	NA	NA	1	1450	4	3
706	143148844116997	4	1	32	3	3	4	1	35065	5	3	3	3	35	6	3	2	6	5	5	1	12	4	4	4	1	3	NA	1	1	1	2	10	7	7	1	NA	3	3	NA	NA	1900	NA	NA	NA	1	1900	3	3
707	143148844193810	4	2	35	4	4	4	4	32107	3	2	5	5	32	7	4	2	16	9	8	1	29	6	6	6	3	1	NA	2	2	2	2	9	6	6	4	2	4	4	NA	NA	NA	2600	NA	NA	2.1	1238.09523809524	5	1
708	143148844194835	4	1	23	2	2	3	1	67482	8	4	1	11	67	3	2	2	1	1	1	1	20	5	5	5	3	1	NA	2	2	2	1	11	1	8	1	NA	2	2	NA	1060	NA	NA	NA	NA	1	1060	5	4
709	143148844297253	4	2	57	5	5	6	4	38022	3	2	5	5	38	8	5	2	22	3	3	2	28	6	6	6	3	1	NA	5	7	5	2	5	4	3	2	0	2	2	NA	1200	NA	NA	NA	NA	1.5	800	6	3
710	143148844318758	4	1	52	5	5	6	2	56094	1	1	6	5	56	6	3	2	6	5	5	1	17	4	4	4	3	1	NA	2	2	2	2	10	7	7	1	NA	4	4	NA	NA	NA	2950	NA	NA	1	2950	2	3
711	143148844333096	4	2	55	5	5	6	4	39198	5	3	1	8	39	3	2	2	10	4	4	1	17	4	4	4	3	1	NA	2	2	2	2	8	6	5	1	NA	3	3	NA	NA	1900	NA	NA	NA	1	1900	3	2
712	143148844341290	4	2	66	6	6	7	4	13206	8	4	1	11	13	9	5	2	21	13	12	3	18	8	7	7	NA	NA	NA	7	8	NA	2	6	5	4	1	NA	2	2	NA	1188	NA	NA	NA	NA	1	1188	5	4
713	143148844345387	4	1	30	3	3	4	1	78361	9	5	4	9	78	1	1	1	12	8	7	1	16	4	4	4	3	1	NA	2	2	2	2	11	8	8	1	NA	3	3	NA	NA	1960	NA	NA	NA	1	1960	3	4
714	143148844362798	4	2	25	3	3	3	3	94033	9	5	3	10	94	1	1	1	12	8	7	1	9	3	3	3	3	1	NA	2	2	2	2	11	8	8	3	0	6	6	NA	NA	NA	NA	NA	7000	2	3500	1	2
715	143148844366895	4	1	50	5	5	6	2	94002	9	5	4	9	94	1	1	1	12	8	7	2	28	6	6	6	3	1	NA	5	7	5	2	5	4	3	6	2	5	5	NA	NA	NA	NA	3000	NA	3.1	967.741935483871	5	1
716	143148844377137	4	2	67	6	6	7	4	6029	8	4	4	10	6	9	5	2	21	13	12	3	30	10	7	7	NA	NA	NA	7	8	NA	2	8	6	5	2	0	7	7	NA	NA	NA	NA	NA	NA	NA	NA	NA	1
717	143148844393526	4	1	66	6	6	7	2	43212	1	1	6	2	43	8	5	2	3	3	3	3	6	7	7	7	NA	NA	NA	7	8	NA	2	8	6	5	2	0	4	4	NA	NA	NA	2500	NA	NA	1.5	1666.66666666667	4	1
718	143148844428351	4	2	78	7	6	8	4	6088	8	4	1	11	6	9	5	2	21	13	12	3	6	7	7	7	NA	NA	NA	7	8	NA	2	11	8	8	1	NA	7	7	NA	NA	NA	NA	NA	NA	NA	NA	NA	3
719	143148844448840	4	1	34	3	3	4	1	68008	1	1	6	1	68	3	2	2	1	1	1	1	16	4	4	4	3	1	NA	2	2	2	2	10	7	7	1	NA	1	1	950	NA	NA	NA	NA	NA	1	950	5	3
720	143148844459086	4	2	72	6	6	8	4	59183	7	4	1	10	59	2	2	2	17	10	9	3	21	8	7	7	NA	NA	NA	7	8	NA	2	5	4	3	1	NA	2	2	NA	1400	NA	NA	NA	NA	1	1400	4	3
721	143148844485720	4	1	49	4	4	5	2	94052	9	5	2	9	94	1	1	1	12	8	7	1	4	2	2	2	1	3	NA	1	1	1	2	8	6	5	3	1	6	6	NA	NA	NA	NA	NA	7000	1.8	3888.88888888889	1	1
722	143148844502107	4	2	70	6	6	8	4	94046	9	5	2	10	94	1	1	1	12	8	7	3	7	7	7	7	NA	NA	NA	7	8	NA	2	11	8	8	1	NA	4	4	NA	NA	NA	2200	NA	NA	1	2200	3	3
723	143148844638319	4	1	58	5	5	6	2	74012	7	4	1	9	74	8	5	2	22	3	3	1	12	4	4	4	7	2	2	3	5	4	2	10	7	7	1	NA	6	6	NA	NA	NA	NA	NA	4600	1	4600	1	2
724	143148844655734	4	2	29	3	3	3	3	83096	1	1	6	2	83	9	5	2	21	13	12	1	5	3	3	3	1	3	NA	1	1	1	2	11	8	8	2	0	4	4	NA	NA	NA	2600	NA	NA	1.5	1733.33333333333	4	1
725	143148844682367	4	1	28	3	3	3	1	51454	8	4	1	11	51	4	2	2	8	1	1	1	15	4	4	4	3	1	NA	2	2	2	2	11	8	8	1	NA	3	3	NA	NA	1900	NA	NA	NA	1	1900	3	4
726	143148844696582	4	1	28	3	3	3	1	75112	9	5	1	11	75	1	1	1	12	8	7	1	21	5	5	5	3	1	NA	2	2	2	2	10	7	7	2	0	3	3	NA	NA	1700	NA	NA	NA	1.5	1133.33333333333	5	1
727	143148844697608	4	1	44	4	4	5	2	75120	9	5	1	11	75	1	1	1	12	8	7	1	22	5	5	5	3	1	NA	2	2	2	2	9	6	6	4	1	4	4	NA	NA	NA	2400	NA	NA	2.3	1043.47826086957	5	1
728	143148844697609	4	2	76	7	6	8	4	67482	8	4	1	11	67	3	2	2	1	1	1	3	11	7	7	7	NA	NA	NA	7	8	NA	2	8	6	5	2	0	5	5	NA	NA	NA	NA	3700	NA	1.5	2466.66666666667	2	1
729	143148844709902	4	1	31	3	3	4	1	35238	8	4	1	11	35	6	3	2	6	5	5	1	4	2	2	2	1	3	NA	1	1	1	2	11	8	8	3	1	6	6	NA	NA	NA	NA	NA	8000	1.8	4444.44444444444	1	1
730	143148844749847	4	2	40	4	4	5	4	67046	6	3	4	7	67	3	2	2	1	1	1	1	18	5	5	5	7	2	1	3	5	4	2	7	5	4	4	2	4	4	NA	NA	NA	2600	NA	NA	2.1	1238.09523809524	5	1
731	143148844790815	4	1	77	7	6	8	2	3004	1	1	6	1	3	8	5	2	3	3	3	3	1	7	7	7	NA	NA	NA	7	8	NA	2	6	5	4	2	0	3	3	NA	NA	1987	NA	NA	NA	1.5	1324.66666666667	4	1
732	143148844801060	4	2	35	4	4	4	4	89066	1	1	6	1	89	4	2	2	5	4	4	1	5	3	3	3	3	1	NA	2	2	2	2	10	7	7	3	1	7	7	NA	NA	NA	NA	NA	NA	NA	NA	NA	1
733	143148844860469	4	2	75	7	6	8	4	30221	3	2	5	5	30	9	5	2	13	9	8	3	20	8	7	7	NA	NA	NA	7	8	NA	2	8	6	5	1	NA	2	2	NA	1400	NA	NA	NA	NA	1	1400	4	3
734	143148844957770	4	2	75	7	6	8	4	69052	8	4	2	4	69	8	5	2	22	3	3	3	7	7	7	7	NA	NA	NA	7	8	NA	2	11	8	8	2	0	4	4	NA	NA	NA	2500	NA	NA	1.5	1666.66666666667	4	1
735	143148844985425	4	2	19	2	2	2	3	31555	8	4	1	11	31	7	4	2	16	9	8	5	NA	9	8	8	NA	NA	NA	6	8	NA	1	8	1	5	1	NA	7	7	NA	NA	NA	NA	NA	NA	NA	NA	NA	3
736	143148845010013	4	1	33	3	3	4	1	4156	1	1	6	1	4	9	5	2	21	13	12	1	2	2	2	2	1	3	NA	1	1	1	2	11	8	8	3	1	5	5	NA	NA	NA	NA	3999	NA	1.8	2221.66666666667	3	1
737	143148845049952	4	2	23	2	2	3	3	7323	3	2	1	2	7	8	5	2	22	3	3	5	NA	9	8	8	NA	NA	NA	6	8	NA	2	10	7	7	4	0	7	7	NA	NA	NA	NA	NA	NA	NA	NA	NA	3
738	143148845064294	4	1	45	4	4	5	2	15014	5	3	1	8	15	8	5	2	3	3	3	1	1	1	1	1	1	3	NA	1	1	1	2	9	6	6	2	0	1	1	800	NA	NA	NA	NA	NA	1.5	533.333333333333	6	1
739	143148845143165	4	2	23	2	2	3	3	34172	8	4	1	11	34	9	5	2	13	9	8	5	NA	9	8	8	NA	NA	NA	6	8	NA	1	10	1	7	2	0	5	5	NA	NA	NA	NA	3500	NA	1.5	2333.33333333333	3	2
740	143148845201412	4	2	70	6	6	8	4	6148	8	4	2	4	6	9	5	2	21	13	12	3	17	7	7	7	NA	NA	NA	7	8	NA	2	8	6	5	2	0	4	4	NA	NA	NA	2400	NA	NA	1.5	1600	4	1
741	143148845235220	4	1	76	7	6	8	2	34157	4	2	5	7	34	9	5	2	13	9	8	3	17	7	7	7	NA	NA	NA	7	8	NA	2	6	5	4	2	0	4	4	NA	NA	NA	2950	NA	NA	1.5	1966.66666666667	3	1
742	143148845250582	4	1	22	2	2	3	1	93029	9	5	4	10	93	1	1	1	12	8	7	1	4	2	2	2	1	3	NA	1	1	1	1	11	1	8	1	NA	3	3	NA	NA	1700	NA	NA	NA	1	1700	4	4
743	143148845291549	4	1	31	3	3	4	1	72154	4	2	5	7	72	6	3	2	18	12	11	7	30	10	7	8	NA	NA	NA	8	8	NA	2	3	2	1	1	NA	7	7	NA	NA	NA	NA	NA	NA	NA	NA	NA	4
744	143148845292575	4	2	26	3	3	3	3	59317	6	3	4	5	59	2	2	2	17	10	9	1	15	4	4	4	3	1	NA	2	2	2	2	11	8	8	2	1	3	3	NA	NA	1600	NA	NA	NA	1.3	1230.76923076923	5	3
745	143148845311013	4	2	26	3	3	3	3	94022	9	5	4	9	94	1	1	1	12	8	7	1	10	3	3	3	3	1	NA	2	2	2	2	11	8	8	4	0	5	5	NA	NA	NA	NA	3900	NA	2.5	1560	4	2
746	143148845324328	4	1	24	2	2	3	1	75113	9	5	1	11	75	1	1	1	12	8	7	1	24	6	6	6	3	1	NA	2	2	2	2	10	7	7	1	NA	7	7	NA	NA	NA	NA	NA	NA	NA	NA	NA	2
747	143148845427780	4	2	23	2	2	3	3	78255	5	3	1	4	78	1	1	1	12	8	7	1	20	5	5	5	3	1	NA	2	2	2	2	10	7	7	2	0	7	7	NA	NA	NA	NA	NA	NA	NA	NA	NA	1
748	143148845475922	4	1	22	2	2	3	1	75116	9	5	1	11	75	1	1	1	12	8	7	5	NA	9	8	8	NA	NA	NA	6	8	NA	1	11	1	8	6	1	6	6	NA	NA	NA	NA	NA	18000	3.3	5454.54545454545	1	1
749	143148845476947	4	2	23	2	2	3	3	76451	8	4	2	7	76	5	3	2	11	11	10	1	21	5	5	5	3	1	NA	2	2	2	1	11	1	8	1	NA	2	2	NA	1050	NA	NA	NA	NA	1	1050	5	3
750	143148845507673	4	1	47	4	4	5	2	67212	2	2	5	4	67	3	2	2	1	1	1	1	23	6	6	6	9	1	NA	2	2	2	2	10	7	7	2	0	2	2	NA	1400	NA	NA	NA	NA	1.5	933.333333333333	5	1
751	143148845524061	4	1	43	4	4	5	2	11106	3	2	5	5	11	9	5	2	13	9	8	1	23	6	6	6	3	1	NA	2	2	2	2	7	5	4	3	0	4	4	NA	NA	NA	2500	NA	NA	2	1250	5	1
752	143148845532259	4	1	69	6	6	7	2	34032	6	3	1	10	34	9	5	2	13	9	8	3	20	8	7	7	NA	NA	NA	7	8	NA	2	8	6	5	1	NA	3	3	NA	NA	1900	NA	NA	NA	1	1900	3	3
753	143148845535332	4	2	22	2	2	3	3	93070	9	5	4	9	93	1	1	1	12	8	7	5	NA	9	8	8	NA	NA	NA	6	8	NA	1	8	1	5	3	0	6	6	NA	NA	NA	NA	NA	20000	2	10000	1	4
754	143148845539429	4	1	79	7	6	8	2	92050	9	5	4	10	92	1	1	1	12	8	7	3	9	7	7	7	NA	NA	NA	7	8	NA	2	9	6	6	2	0	6	6	NA	NA	NA	NA	NA	6500	1.5	4333.33333333333	1	1
755	143148845539430	4	1	39	4	4	4	2	59183	7	4	1	10	59	2	2	2	17	10	9	1	23	6	6	6	3	1	NA	2	2	2	2	10	7	7	4	2	2	2	NA	1480	NA	NA	NA	NA	2.1	704.761904761905	6	1
756	143148845591663	4	1	78	7	6	8	2	31150	8	4	2	5	31	7	4	2	16	9	8	3	10	7	7	7	NA	NA	NA	7	8	NA	2	10	7	7	2	0	5	5	NA	NA	NA	NA	3400	NA	1.5	2266.66666666667	3	1
757	143148845597810	4	1	77	7	6	8	2	83118	6	3	3	9	83	9	5	2	21	13	12	3	9	7	7	7	NA	NA	NA	7	8	NA	2	11	8	8	2	0	7	7	NA	NA	NA	NA	NA	NA	NA	NA	NA	2
758	143148845599860	4	1	68	6	6	7	2	27453	1	1	6	2	27	5	3	2	11	11	10	3	17	7	7	7	NA	NA	NA	7	8	NA	2	6	5	4	2	0	4	4	NA	NA	NA	2900	NA	NA	1.5	1933.33333333333	3	1
759	143148845604982	4	1	66	6	6	7	2	59009	8	4	4	10	59	2	2	2	17	10	9	3	10	7	7	7	NA	NA	NA	7	8	NA	2	8	6	5	2	0	5	5	NA	NA	NA	NA	3600	NA	1.5	2400	3	1
760	143148845616249	4	1	23	2	2	3	1	73051	7	4	2	4	73	8	5	2	22	3	3	1	9	3	3	3	3	1	NA	2	2	2	1	11	1	8	2	0	4	4	NA	NA	NA	2100	NA	NA	1.5	1400	4	1
761	143148845716492	4	1	32	3	3	4	1	30223	6	3	4	4	30	9	5	2	13	9	8	1	24	6	6	6	3	1	NA	2	2	2	2	6	5	4	3	1	5	5	NA	NA	NA	NA	3450	NA	1.8	1916.66666666667	3	1
762	143148845794339	4	2	32	3	3	4	3	35006	2	2	5	4	35	6	3	2	6	5	5	1	9	3	3	3	3	1	NA	2	2	2	2	11	8	8	3	1	6	6	NA	NA	NA	NA	NA	5000	1.8	2777.77777777778	2	1
763	143148845875262	4	1	75	7	6	8	2	14191	2	2	5	4	14	5	3	2	4	11	10	3	17	7	7	7	NA	NA	NA	7	8	NA	2	7	5	4	2	0	5	5	NA	NA	NA	NA	3250	NA	1.5	2166.66666666667	3	1
764	143148845905997	4	1	30	3	3	4	1	69381	8	4	1	11	69	8	5	2	22	3	3	1	7	3	3	3	5	2	3	3	4	4	2	11	8	8	1	NA	4	4	NA	NA	NA	2200	NA	NA	1	2200	3	3
765	143148845914190	4	1	75	7	6	8	2	77058	9	5	3	8	77	1	1	1	12	8	7	3	9	7	7	7	NA	NA	NA	7	8	NA	2	11	8	8	1	NA	4	4	NA	NA	NA	2500	NA	NA	1	2500	2	3
766	143148845962332	4	1	72	6	6	8	2	69266	8	4	4	11	69	8	5	2	22	3	3	3	10	7	7	7	NA	NA	NA	7	8	NA	2	11	8	8	2	0	5	5	NA	NA	NA	NA	3210	NA	1.5	2140	3	1
767	143148845972576	4	2	21	2	2	3	3	37266	8	4	3	5	37	5	3	2	7	6	6	5	NA	9	8	8	NA	NA	NA	6	8	NA	1	11	1	8	2	0	1	1	560	NA	NA	NA	NA	NA	1.5	373.333333333333	6	2
768	143148846134278	4	1	58	5	5	6	2	66136	8	4	1	11	66	9	5	2	13	9	8	2	4	2	2	2	1	3	NA	5	7	5	2	11	8	8	1	NA	1	1	900	NA	NA	NA	NA	NA	1	900	5	3
769	143148846156813	4	2	37	4	4	4	4	90001	1	1	6	2	90	3	2	2	10	4	4	1	5	3	3	3	1	3	NA	1	1	1	2	11	8	8	3	1	6	6	NA	NA	NA	NA	NA	7000	1.8	3888.88888888889	1	1
770	143148846159888	4	1	79	7	6	8	2	78688	9	5	2	7	78	1	1	1	12	8	7	3	9	7	7	7	NA	NA	NA	7	8	NA	2	8	6	5	2	0	6	6	NA	NA	NA	NA	NA	4200	1.5	2800	2	1
771	143148846273589	4	2	51	5	5	6	4	81004	6	3	1	9	81	7	4	2	16	9	8	1	20	5	5	5	3	1	NA	2	2	2	2	10	7	7	4	0	5	5	NA	NA	NA	NA	3500	NA	2.5	1400	4	1
772	143148846289978	4	1	34	3	3	4	1	72181	8	4	1	11	72	6	3	2	18	12	11	1	23	6	6	6	3	1	NA	2	2	2	2	7	5	4	3	1	4	4	NA	NA	NA	2850	NA	NA	1.8	1583.33333333333	4	1
773	143148846289980	4	1	21	2	2	3	1	77257	2	2	1	4	77	1	1	1	12	8	7	1	28	6	6	6	3	1	NA	2	2	2	2	8	6	5	4	0	2	2	NA	1400	NA	NA	NA	NA	2.5	560	6	2
774	143148846356555	4	2	45	4	4	5	4	30189	7	4	1	11	30	9	5	2	13	9	8	1	18	5	5	5	8	2	NA	2	3	3	1	8	1	5	1	NA	3	3	NA	NA	1600	NA	NA	NA	1	1600	4	3
775	143148846505068	4	2	24	2	2	3	3	41018	6	3	1	9	41	5	3	2	7	6	6	1	20	5	5	5	8	2	NA	2	3	3	2	10	7	7	2	0	5	5	NA	NA	NA	NA	3800	NA	1.5	2533.33333333333	2	3
776	143148846506093	4	1	66	6	6	7	2	59239	3	2	5	5	59	2	2	2	17	10	9	3	18	8	7	7	NA	NA	NA	7	8	NA	2	5	4	3	1	NA	3	3	NA	NA	1657	NA	NA	NA	1	1657	4	3
777	143148846532727	4	2	40	4	4	5	4	13018	8	4	4	4	13	9	5	2	21	13	12	1	28	6	6	6	3	1	NA	2	2	2	2	9	6	6	4	1	5	5	NA	NA	NA	NA	3900	NA	2.3	1695.65217391304	4	1
778	143148846532728	4	1	21	2	2	3	1	85191	6	3	5	10	85	6	3	2	18	12	11	1	20	5	5	5	3	1	NA	2	2	2	1	8	1	5	2	0	2	2	NA	1450	NA	NA	NA	NA	1.5	966.666666666667	5	4
779	143148846695454	4	2	52	5	5	6	4	83061	6	3	1	10	83	9	5	2	21	13	12	1	11	4	4	4	5	2	2	3	5	4	2	11	8	8	4	0	6	6	NA	NA	NA	NA	NA	5000	2.5	2000	3	1
780	143148846772278	4	1	45	4	4	5	2	93072	9	5	4	9	93	1	1	1	12	8	7	1	21	5	5	5	3	1	NA	2	2	2	2	7	5	4	3	1	7	7	NA	NA	NA	NA	NA	NA	NA	NA	NA	1
781	143148846772279	4	2	77	7	6	8	4	77449	3	2	5	5	77	1	1	1	12	8	7	3	3	7	7	7	NA	NA	NA	7	8	NA	2	8	6	5	2	0	7	7	NA	NA	NA	NA	NA	NA	NA	NA	NA	1
782	143148846772280	4	1	20	2	2	3	1	67482	8	4	1	11	67	3	2	2	1	1	1	1	23	6	6	6	4	2	NA	2	3	3	1	5	1	3	4	1	5	5	NA	NA	NA	NA	3200	NA	2.3	1391.30434782609	4	2
783	143148846848063	4	1	51	5	5	6	2	51550	1	1	6	1	51	4	2	2	8	1	1	1	23	6	6	6	3	1	NA	2	2	2	2	5	4	3	4	0	7	7	NA	NA	NA	NA	NA	NA	NA	NA	NA	1
784	143148846890058	4	1	51	5	5	6	2	7343	5	3	3	2	7	8	5	2	22	3	3	7	9	7	7	8	NA	NA	NA	8	8	NA	2	11	8	8	1	NA	4	4	NA	NA	NA	2600	NA	NA	1	2600	2	3
785	143148846901324	4	2	22	2	2	3	3	59350	8	4	1	11	59	2	2	2	17	10	9	5	NA	9	8	8	NA	NA	NA	6	8	NA	1	11	1	8	4	0	2	2	NA	1400	NA	NA	NA	NA	2.5	560	6	2
786	143148846955605	4	2	25	3	3	3	3	42218	8	4	1	11	42	8	5	2	22	3	3	6	16	7	7	8	NA	NA	NA	8	8	NA	2	7	5	4	3	1	2	2	NA	1000	NA	NA	NA	NA	1.8	555.555555555556	6	1
787	143148846997602	4	1	41	4	4	5	2	84129	8	4	4	7	84	9	5	2	21	13	12	2	3	2	2	2	1	3	NA	5	7	5	2	7	5	4	5	3	7	7	NA	NA	NA	NA	NA	NA	NA	NA	NA	1
788	143148847011944	4	1	76	7	6	8	2	41047	6	3	3	4	41	5	3	2	7	6	6	3	9	7	7	7	NA	NA	NA	7	8	NA	2	10	7	7	2	0	5	5	NA	NA	NA	NA	3800	NA	1.5	2533.33333333333	2	1
789	143148847030385	4	2	46	4	4	5	4	77394	9	5	2	3	77	1	1	1	12	8	7	1	27	6	6	6	3	1	NA	2	2	2	2	3	2	1	2	0	4	4	NA	NA	NA	2400	NA	NA	1.5	1600	4	1
790	143148847090691	4	2	22	2	2	3	3	34172	8	4	1	11	34	9	5	2	13	9	8	5	NA	9	8	8	NA	NA	NA	6	8	NA	1	11	1	8	1	NA	7	7	NA	NA	NA	NA	NA	NA	NA	NA	NA	4
791	143148847291411	4	2	55	5	5	6	4	35126	3	2	5	5	35	6	3	2	6	5	5	1	22	5	5	5	3	1	NA	2	2	2	2	8	6	5	2	0	7	7	NA	NA	NA	NA	NA	NA	NA	NA	NA	1
792	143148847435835	4	1	32	3	3	4	1	69029	8	4	4	9	69	8	5	2	22	3	3	1	24	6	6	6	3	1	NA	2	2	2	1	9	1	6	3	0	6	6	NA	NA	NA	NA	NA	4500	2	2250	3	1
793	143148847441981	4	2	20	2	2	3	3	33046	1	1	6	2	33	7	4	2	2	2	2	5	NA	9	8	8	NA	NA	NA	6	8	NA	1	10	1	7	1	NA	1	1	800	NA	NA	NA	NA	NA	1	800	6	4
794	143148847590497	4	2	43	4	4	5	4	83126	8	4	4	10	83	9	5	2	21	13	12	7	30	10	7	8	NA	NA	NA	8	8	NA	2	6	5	4	1	NA	1	1	400	NA	NA	NA	NA	NA	1	400	6	3
795	143148847731727	4	2	51	5	5	6	4	77390	9	5	3	8	77	1	1	1	12	8	7	1	18	5	5	5	6	2	2	3	5	4	2	5	4	3	1	NA	3	3	NA	NA	1606	NA	NA	NA	1	1606	4	3
796	143148847822887	4	1	42	4	4	5	2	56066	2	2	5	4	56	6	3	2	6	5	5	1	16	4	4	4	9	1	NA	2	2	2	2	11	8	8	3	1	5	5	NA	NA	NA	NA	3700	NA	1.8	2055.55555555556	3	1
797	143148847862837	4	1	67	6	6	7	2	62863	8	4	3	4	62	2	2	2	17	10	9	3	15	7	7	7	NA	NA	NA	7	8	NA	2	8	6	5	2	0	4	4	NA	NA	NA	2950	NA	NA	1.5	1966.66666666667	3	1
798	143148847958085	4	2	81	7	6	8	4	92019	9	5	2	9	92	1	1	1	12	8	7	3	7	7	7	7	NA	NA	NA	7	8	NA	2	11	8	8	2	0	4	4	NA	NA	NA	2990	NA	NA	1.5	1993.33333333333	3	1
799	143148848060500	4	2	60	5	5	7	4	59350	8	4	1	11	59	2	2	2	17	10	9	3	3	7	7	7	NA	NA	NA	7	8	NA	2	5	4	3	1	NA	1	1	950	NA	NA	NA	NA	NA	1	950	5	3
800	143148848065623	4	2	36	4	4	4	4	78650	9	5	2	7	78	1	1	1	12	8	7	1	12	4	4	4	7	2	2	3	5	4	2	10	7	7	4	2	5	5	NA	NA	NA	NA	3800	NA	2.1	1809.52380952381	4	1
801	143148848105570	4	1	46	4	4	5	2	67482	8	4	1	11	67	3	2	2	1	1	1	1	23	6	6	6	3	1	NA	2	2	2	2	7	5	4	3	1	4	4	NA	NA	NA	2600	NA	NA	1.8	1444.44444444444	4	1
802	143148848111717	4	2	80	7	6	8	4	59350	8	4	1	11	59	2	2	2	17	10	9	3	14	7	7	7	NA	NA	NA	7	8	NA	2	10	7	7	1	NA	7	7	NA	NA	NA	NA	NA	NA	NA	NA	NA	3
803	143148848441388	4	2	77	7	6	8	4	82102	1	1	6	1	82	7	4	2	16	9	8	3	17	7	7	7	NA	NA	NA	7	8	NA	2	10	7	7	1	NA	3	3	NA	NA	1689	NA	NA	NA	1	1689	4	3
804	143148848443441	4	2	33	3	3	4	3	60047	1	1	6	1	60	4	2	2	19	10	9	1	14	4	4	4	5	2	2	3	5	4	1	10	1	7	3	1	4	4	NA	NA	NA	2800	NA	NA	1.8	1555.55555555556	4	1
805	143148848504906	4	2	68	6	6	7	4	38126	8	4	2	4	38	8	5	2	22	3	3	3	6	7	7	7	NA	NA	NA	7	8	NA	2	11	8	8	2	0	6	6	NA	NA	NA	NA	NA	6500	1.5	4333.33333333333	1	1
806	143148848648311	4	2	24	2	2	3	3	67482	8	4	1	11	67	3	2	2	1	1	1	1	7	3	3	3	5	2	3	3	4	4	2	11	8	8	2	0	5	5	NA	NA	NA	NA	3600	NA	1.5	2400	3	1
807	143148849237027	4	2	37	4	4	4	4	44109	8	4	1	11	44	6	3	2	18	12	11	1	10	3	3	3	2	4	NA	2	1	1	2	11	8	8	2	0	6	6	NA	NA	NA	NA	NA	5200	1.5	3466.66666666667	1	1
808	143148849526877	4	2	22	2	2	3	3	93030	9	5	4	7	93	1	1	1	12	8	7	2	20	5	5	5	3	1	NA	5	7	5	2	9	6	6	3	1	2	2	NA	1300	NA	NA	NA	NA	1.8	722.222222222222	6	1
809	143148849721354	4	1	32	3	3	4	1	37122	8	4	4	9	37	5	3	2	7	6	6	1	24	6	6	6	4	2	NA	2	3	3	2	8	6	5	2	0	4	4	NA	NA	NA	2400	NA	NA	1.5	1600	4	1
810	143148849760274	4	2	76	7	6	8	4	91477	9	5	2	9	91	1	1	1	12	8	7	3	22	8	7	7	NA	NA	NA	7	8	NA	2	4	3	2	2	0	3	3	NA	NA	1980	NA	NA	NA	1.5	1320	4	1
811	143148849802282	4	1	37	4	4	4	2	59631	2	2	5	3	59	2	2	2	17	10	9	1	12	4	4	4	5	2	3	3	4	4	2	9	6	6	4	1	6	6	NA	NA	NA	NA	NA	4500	2.3	1956.52173913043	3	1
812	143148849936460	4	2	41	4	4	5	4	45004	6	3	1	7	45	5	3	2	7	6	6	6	30	10	7	8	NA	NA	NA	8	8	NA	2	11	8	8	3	1	7	7	NA	NA	NA	NA	NA	NA	NA	NA	NA	1
813	143148849943630	4	1	24	2	2	3	1	56014	1	1	6	2	56	6	3	2	6	5	5	1	27	6	6	6	4	2	NA	2	3	3	2	5	4	3	3	0	7	7	NA	NA	NA	NA	NA	NA	NA	NA	NA	3
814	143148850222090	4	2	76	7	6	8	4	34145	5	3	1	8	34	9	5	2	13	9	8	3	14	7	7	7	NA	NA	NA	7	8	NA	2	10	7	7	2	0	4	4	NA	NA	NA	2800	NA	NA	1.5	1866.66666666667	3	1
815	143148850651154	4	1	19	2	2	2	1	13215	8	4	1	11	13	9	5	2	21	13	12	1	7	3	3	3	5	2	1	3	5	4	1	1	1	1	4	2	1	1	200	NA	NA	NA	NA	NA	2.1	95.2380952380952	6	3
816	143148850727981	4	1	80	7	6	8	2	94001	9	5	3	5	94	1	1	1	12	8	7	3	9	7	7	7	NA	NA	NA	7	8	NA	2	5	4	3	1	NA	4	4	NA	NA	NA	2300	NA	NA	1	2300	3	2
817	143148850767929	4	2	27	3	3	3	3	44190	8	4	3	8	44	6	3	2	18	12	11	1	12	4	4	4	3	1	NA	2	2	2	2	10	7	7	2	0	4	4	NA	NA	NA	2400	NA	NA	1.5	1600	4	1
818	143148850820167	4	1	46	4	4	5	2	35238	8	4	1	11	35	6	3	2	6	5	5	1	23	6	6	6	3	1	NA	2	2	2	2	7	5	4	2	1	2	2	NA	1325	NA	NA	NA	NA	1.3	1019.23076923077	5	3
819	143148850950254	4	2	20	2	2	3	3	69204	8	4	2	8	69	8	5	2	22	3	3	5	NA	9	8	8	NA	NA	NA	6	8	NA	1	9	1	6	5	1	6	6	NA	NA	NA	NA	NA	4500	2.8	1607.14285714286	4	3
820	143148851463178	4	2	34	3	3	4	3	91434	9	5	3	8	91	1	1	1	12	8	7	1	18	5	5	5	4	2	NA	2	3	3	2	8	6	5	4	2	5	5	NA	NA	NA	NA	3300	NA	2.1	1571.42857142857	4	1
821	143148851595319	4	1	22	2	2	3	1	3185	6	3	1	9	3	8	5	2	3	3	3	1	23	6	6	6	1	3	NA	1	1	1	1	8	1	5	2	1	3	3	NA	NA	1800	NA	NA	NA	1.3	1384.61538461538	4	4
822	143148851731541	4	1	20	2	2	3	1	93027	9	5	4	9	93	1	1	1	12	8	7	1	21	5	5	5	3	1	NA	2	2	2	1	10	1	7	2	0	2	2	NA	1200	NA	NA	NA	NA	1.5	800	6	1
823	143148852265023	4	2	77	7	6	8	4	6079	8	4	3	8	6	9	5	2	21	13	12	7	15	7	7	8	NA	NA	NA	8	8	NA	2	7	5	4	1	NA	2	2	NA	1200	NA	NA	NA	NA	1	1200	5	3
824	143148852878357	4	2	77	7	6	8	4	74239	4	2	3	2	74	8	5	2	22	3	3	3	6	7	7	7	NA	NA	NA	7	8	NA	2	10	7	7	1	NA	4	4	NA	NA	NA	2700	NA	NA	1	2700	2	3
825	143148854130773	4	1	62	5	5	7	2	65417	6	3	3	4	65	7	4	2	16	9	8	3	10	7	7	7	NA	NA	NA	7	8	NA	2	11	8	8	3	0	7	7	NA	NA	NA	NA	NA	NA	NA	NA	NA	1
826	143148855267342	4	2	24	2	2	3	3	51367	1	1	6	2	51	4	2	2	8	1	1	1	20	5	5	5	3	1	NA	2	2	2	2	10	7	7	1	NA	2	2	NA	1450	NA	NA	NA	NA	1	1450	4	3
827	143148855765071	4	2	33	3	3	4	3	50502	5	3	1	7	50	5	3	2	4	11	10	2	11	4	4	4	3	1	NA	5	7	5	2	6	5	4	1	NA	1	1	0	NA	NA	NA	NA	NA	1	0	6	3
828	143148856837214	4	1	33	3	3	4	1	58227	1	1	6	2	58	4	2	2	5	4	4	1	3	2	2	2	1	3	NA	1	1	1	2	2	2	1	4	2	2	2	NA	1400	NA	NA	NA	NA	2.1	666.666666666667	6	1
829	143148857969701	4	2	25	3	3	3	3	91687	9	5	3	9	91	1	1	1	12	8	7	1	20	5	5	5	4	2	NA	2	3	3	1	5	1	3	3	2	3	3	NA	NA	1700	NA	NA	NA	1.6	1062.5	5	1
830	143148857987121	4	1	42	4	4	5	2	30189	7	4	1	11	30	9	5	2	13	9	8	1	20	5	5	5	3	1	NA	2	2	2	2	9	6	6	3	1	5	5	NA	NA	NA	NA	3000	NA	1.8	1666.66666666667	4	1
831	143148858731520	4	2	22	2	2	3	3	14102	1	1	6	2	14	5	3	2	4	11	10	5	NA	9	8	8	NA	NA	NA	6	8	NA	1	8	1	5	1	NA	1	1	390	NA	NA	NA	NA	NA	1	390	6	4
832	143148859328626	4	1	32	3	3	4	1	83137	8	4	1	11	83	9	5	2	21	13	12	1	11	4	4	4	5	2	2	3	5	4	2	8	6	5	3	1	4	4	NA	NA	NA	2150	NA	NA	1.8	1194.44444444444	5	1
833	143148860094494	4	2	34	3	3	4	3	27425	1	1	6	3	27	5	3	2	11	11	10	1	28	6	6	6	3	1	NA	2	2	2	2	9	6	6	4	2	5	5	NA	NA	NA	NA	3200	NA	2.1	1523.80952380952	4	1
834	143148861530149	4	2	23	2	2	3	3	80472	1	1	6	1	80	4	2	2	19	10	9	1	29	6	6	6	3	1	NA	2	2	2	1	6	1	4	1	NA	3	3	NA	NA	1950	NA	NA	NA	1	1950	3	4
835	143148861635668	4	1	21	2	2	3	1	63113	8	4	1	11	63	8	5	2	3	3	3	1	23	6	6	6	4	2	NA	2	3	3	1	11	1	8	1	NA	2	2	NA	1099	NA	NA	NA	NA	1	1099	5	4
836	143148861823015	4	1	48	4	4	5	2	35238	8	4	1	11	35	6	3	2	6	5	5	1	14	4	4	4	5	2	2	3	5	4	2	10	7	7	2	0	6	6	NA	NA	NA	NA	NA	4100	1.5	2733.33333333333	2	1
837	143148861925469	4	2	33	3	3	4	3	76540	8	4	1	11	76	5	3	2	11	11	10	1	2	2	2	2	1	3	NA	1	1	1	2	10	7	7	2	0	3	3	NA	NA	1600	NA	NA	NA	1.5	1066.66666666667	5	1
838	143148862177368	4	1	20	2	2	3	1	95566	2	2	5	3	95	1	1	1	12	8	7	1	18	5	5	5	5	2	1	3	5	4	2	8	6	5	5	0	4	4	NA	NA	NA	2500	NA	NA	3	833.333333333333	6	4
839	143148862235775	4	1	56	5	5	6	2	38190	1	1	6	2	38	8	5	2	22	3	3	1	23	6	6	6	3	1	NA	2	2	2	2	6	5	4	1	NA	4	4	NA	NA	NA	2400	NA	NA	1	2400	3	2
840	143148863044638	4	1	67	6	6	7	2	21171	8	4	3	7	21	4	2	2	5	4	4	3	19	8	7	7	NA	NA	NA	7	8	NA	2	5	4	3	2	0	3	3	NA	NA	1846	NA	NA	NA	1.5	1230.66666666667	5	1
841	143148864057451	4	2	20	2	2	3	3	13054	8	4	4	9	13	9	5	2	21	13	12	5	NA	9	8	8	NA	NA	NA	6	8	NA	1	8	1	5	3	1	2	2	NA	1200	NA	NA	NA	NA	1.8	666.666666666667	6	3
842	143148864410706	4	1	34	3	3	4	1	71436	3	2	4	2	71	4	2	2	5	4	4	1	29	6	6	6	3	1	NA	2	2	2	2	8	6	5	2	0	5	5	NA	NA	NA	NA	3100	NA	1.5	2066.66666666667	3	1
843	143148865407066	4	2	34	3	3	4	3	44198	8	4	3	5	44	6	3	2	18	12	11	1	23	6	6	6	3	1	NA	2	2	2	2	8	6	5	2	0	5	5	NA	NA	NA	NA	3650	NA	1.5	2433.33333333333	3	1
844	143148867081335	4	1	57	5	5	6	2	57480	8	4	3	8	57	3	2	2	15	1	1	1	27	6	6	6	3	1	NA	2	2	2	2	7	5	4	3	1	3	3	NA	NA	1900	NA	NA	NA	1.8	1055.55555555556	5	1
845	143148868905040	4	2	24	2	2	3	3	77284	6	3	1	10	77	1	1	1	12	8	7	1	18	5	5	5	6	2	3	3	4	4	2	9	6	6	2	0	4	4	NA	NA	NA	2600	NA	NA	1.5	1733.33333333333	4	1
846	143148869549082	4	1	31	3	3	4	1	63113	8	4	1	11	63	8	5	2	3	3	3	1	26	6	6	6	3	1	NA	2	2	2	2	11	8	8	2	0	5	5	NA	NA	NA	NA	3300	NA	1.5	2200	3	3
847	143148869720093	4	1	44	4	4	5	2	33281	8	4	3	10	33	7	4	2	2	2	2	1	24	6	6	6	3	1	NA	2	2	2	2	8	6	5	5	1	4	4	NA	NA	NA	2600	NA	NA	2.8	928.571428571429	5	1
848	143148870081599	4	2	73	6	6	8	4	10357	7	4	3	3	10	4	2	2	8	1	1	3	18	8	7	7	NA	NA	NA	7	8	NA	2	8	6	5	2	0	4	4	NA	NA	NA	2650	NA	NA	1.5	1766.66666666667	4	1
849	143148870622263	4	1	24	2	2	3	1	62014	8	4	4	6	62	2	2	2	17	10	9	2	21	5	5	5	4	2	NA	5	7	5	2	6	5	4	8	4	6	6	NA	NA	NA	NA	NA	5600	3.7	1513.51351351351	4	4
850	143148871845915	4	2	19	2	2	2	3	31424	8	4	2	7	31	7	4	2	16	9	8	5	NA	9	8	8	NA	NA	NA	6	8	NA	1	4	1	2	5	2	4	4	NA	NA	NA	2505	NA	NA	2.6	963.461538461538	5	1
851	143148872490075	4	2	67	6	6	7	4	21231	8	4	1	11	21	4	2	2	5	4	4	3	14	7	7	7	NA	NA	NA	7	8	NA	2	8	6	5	1	NA	2	2	NA	1200	NA	NA	NA	NA	1	1200	5	3
852	143148872701000	4	2	27	3	3	3	3	55049	1	1	6	1	55	3	2	2	15	1	1	1	27	6	6	6	3	1	NA	2	2	2	2	10	7	7	2	1	7	7	NA	NA	NA	NA	NA	NA	NA	NA	NA	2
853	143148872773666	4	2	51	5	5	6	4	34086	1	1	6	1	34	9	5	2	13	9	8	1	18	5	5	5	3	1	NA	2	2	2	2	8	6	5	2	0	3	3	NA	NA	1800	NA	NA	NA	1.5	1200	5	1
854	143148872853516	4	2	28	3	3	3	3	57529	2	2	5	3	57	3	2	2	15	1	1	1	12	4	4	4	3	1	NA	2	2	2	2	10	7	7	1	NA	2	2	NA	1100	NA	NA	NA	NA	1	1100	5	2
855	143148872885303	4	1	31	3	3	4	1	80171	5	3	3	1	80	4	2	2	19	10	9	2	18	5	5	5	6	2	3	5	7	5	2	9	6	6	2	0	1	1	560	NA	NA	NA	NA	NA	1.5	373.333333333333	6	1
856	143148872952833	4	1	47	4	4	5	2	59322	2	2	5	3	59	2	2	2	17	10	9	1	2	2	2	2	1	3	NA	1	1	1	2	7	5	4	3	0	4	4	NA	NA	NA	2700	NA	NA	2	1350	4	1
857	143148872990758	4	2	69	6	6	7	4	27284	4	2	1	7	27	5	3	2	11	11	10	3	23	8	7	7	NA	NA	NA	7	8	NA	2	2	2	1	2	0	1	1	950	NA	NA	NA	NA	NA	1.5	633.333333333333	6	1
858	143148873001018	4	2	33	3	3	4	3	34145	5	3	1	8	34	9	5	2	13	9	8	1	20	5	5	5	3	1	NA	2	2	2	2	11	8	8	3	1	4	4	NA	NA	NA	2600	NA	NA	1.8	1444.44444444444	4	1
859	143148873206792	4	1	42	4	4	5	2	27335	1	1	6	2	27	5	3	2	11	11	10	1	6	3	3	3	5	2	2	3	5	4	2	11	8	8	6	5	5	5	NA	NA	NA	NA	3400	NA	2.5	1360	4	1
860	143148873305199	4	2	23	2	2	3	3	62133	8	4	4	5	62	2	2	2	17	10	9	1	12	4	4	4	3	1	NA	2	2	2	1	8	1	5	1	NA	2	2	NA	1100	NA	NA	NA	NA	1	1100	5	4
861	143148873314427	4	1	23	2	2	3	1	45187	2	2	5	3	45	5	3	2	7	6	6	1	24	6	6	6	4	2	NA	2	3	3	2	6	5	4	4	0	7	7	NA	NA	NA	NA	NA	NA	NA	NA	NA	3
862	143148873358428	4	2	19	2	2	2	3	29150	3	2	5	5	29	6	3	2	6	5	5	5	NA	9	8	8	NA	NA	NA	6	8	NA	1	8	1	5	5	2	4	4	NA	NA	NA	2500	NA	NA	2.6	961.538461538462	5	3
863	143148873368679	4	2	53	5	5	6	4	13063	8	4	4	8	13	9	5	2	21	13	12	1	26	6	6	6	3	1	NA	2	2	2	2	7	5	4	3	0	5	5	NA	NA	NA	NA	3500	NA	2	1750	4	1
864	143148873380981	4	2	30	3	3	4	3	75107	9	5	1	11	75	1	1	1	12	8	7	1	9	3	3	3	3	1	NA	2	2	2	2	11	8	8	2	0	6	6	NA	NA	NA	NA	NA	6500	1.5	4333.33333333333	1	1
865	143148873396349	4	1	24	2	2	3	1	93014	9	5	4	8	93	1	1	1	12	8	7	7	18	8	7	8	NA	NA	NA	8	8	NA	2	8	6	5	3	0	2	2	NA	1300	NA	NA	NA	NA	2	650	6	3
866	143148873447532	4	2	40	4	4	5	4	60395	4	2	5	7	60	4	2	2	19	10	9	1	18	5	5	5	3	1	NA	2	2	2	2	9	6	6	1	NA	2	2	NA	1200	NA	NA	NA	NA	1	1200	5	3
867	143148873453572	4	1	38	4	4	4	2	92051	9	5	2	10	92	1	1	1	12	8	7	1	21	5	5	5	3	1	NA	2	2	2	2	8	6	5	2	0	4	4	NA	NA	NA	2999	NA	NA	1.5	1999.33333333333	3	1
868	143148873454597	4	1	55	5	5	6	2	33051	4	2	1	7	33	7	4	2	2	2	2	2	21	5	5	5	3	1	NA	5	7	5	2	5	4	3	1	NA	2	2	NA	1200	NA	NA	NA	NA	1	1200	5	4
869	143148873460770	4	1	34	3	3	4	1	45232	8	4	2	8	45	5	3	2	7	6	6	2	28	6	6	6	3	1	NA	5	7	5	2	5	4	3	3	1	4	4	NA	NA	NA	2900	NA	NA	1.8	1611.11111111111	4	1
870	143148873462826	4	1	19	2	2	2	1	35238	8	4	1	11	35	6	3	2	6	5	5	1	29	6	6	6	3	1	NA	2	2	2	2	8	6	5	1	NA	2	2	NA	1250	NA	NA	NA	NA	1	1250	5	4
871	143148873475135	4	1	39	4	4	4	2	59183	7	4	1	10	59	2	2	2	17	10	9	1	23	6	6	6	3	1	NA	2	2	2	2	10	7	7	4	2	3	3	NA	NA	1580	NA	NA	NA	2.1	752.380952380952	6	1
872	143148873480280	4	2	25	3	3	3	3	42134	1	1	6	2	42	8	5	2	22	3	3	1	23	6	6	6	9	1	NA	2	2	2	2	8	6	5	3	2	2	2	NA	1430	NA	NA	NA	NA	1.6	893.75	5	3
873	143148873484395	4	2	22	2	2	3	3	49099	6	3	1	10	49	6	3	2	18	12	11	1	18	5	5	5	5	2	2	3	5	4	2	6	5	4	2	0	4	4	NA	NA	NA	2800	NA	NA	1.5	1866.66666666667	3	1
874	143148873491469	4	2	20	2	2	3	3	62660	2	2	3	1	62	2	2	2	17	10	9	1	11	4	4	4	5	2	2	3	5	4	1	10	1	7	4	1	3	3	NA	NA	1700	NA	NA	NA	2.3	739.130434782609	6	1
875	143148873491470	4	2	18	2	2	2	3	91339	9	5	2	5	91	1	1	1	12	8	7	5	NA	9	8	8	NA	NA	NA	6	8	NA	1	9	1	6	5	2	7	7	NA	NA	NA	NA	NA	NA	NA	NA	NA	3
876	143148873494556	4	1	22	2	2	3	1	33063	8	4	1	11	33	7	4	2	2	2	2	5	NA	9	8	8	NA	NA	NA	6	8	NA	1	10	1	7	4	0	5	5	NA	NA	NA	NA	3000	NA	2.5	1200	5	3
877	143148873496613	4	2	26	3	3	3	3	32072	1	1	6	1	32	7	4	2	16	9	8	1	29	6	6	6	1	3	NA	1	1	1	2	1	2	1	3	1	3	3	NA	NA	1500	NA	NA	NA	1.8	833.333333333333	6	1
878	143148873499701	4	1	22	2	2	3	1	31582	2	2	1	4	31	7	4	2	16	9	8	1	5	3	3	3	1	3	NA	1	1	1	2	10	7	7	4	2	5	5	NA	NA	NA	NA	3700	NA	2.1	1761.90476190476	4	1
879	143148873509991	4	1	28	3	3	3	1	93008	9	5	4	10	93	1	1	1	12	8	7	2	8	3	3	3	10	5	NA	5	7	NA	2	11	8	8	1	NA	4	4	NA	NA	NA	2300	NA	NA	1	2300	3	3
880	143148873513079	4	1	20	2	2	3	1	42047	1	1	6	1	42	8	5	2	22	3	3	4	NA	10	8	8	NA	NA	NA	5	8	5	2	5	4	3	3	0	7	7	NA	NA	NA	NA	NA	NA	NA	NA	NA	4
881	143169112152160	4	1	62	5	5	7	2	32344	1	1	6	2	32	7	4	2	16	9	8	7	29	8	7	8	NA	NA	NA	8	8	NA	2	8	6	5	2	0	3	3	NA	NA	1550	NA	NA	NA	1.5	1033.33333333333	5	1
882	143169112334439	4	1	43	4	4	5	2	51118	1	1	6	2	51	4	2	2	8	1	1	1	7	3	3	3	5	2	2	3	5	4	2	11	8	8	4	2	6	6	NA	NA	NA	NA	NA	6500	2.1	3095.23809523809	2	1
883	143169112347757	4	1	62	5	5	7	2	92063	9	5	2	10	92	1	1	1	12	8	7	1	7	3	3	3	1	3	NA	1	1	1	2	11	8	8	2	0	6	6	NA	NA	NA	NA	NA	7000	1.5	4666.66666666667	1	1
884	143169112347759	4	1	47	4	4	5	2	94052	9	5	2	9	94	1	1	1	12	8	7	1	14	4	4	4	5	2	2	3	5	4	2	10	7	7	2	1	7	7	NA	NA	NA	NA	NA	NA	NA	NA	NA	3
885	143169112348785	4	2	47	4	4	5	4	27003	5	3	3	2	27	5	3	2	11	11	10	1	20	5	5	5	3	1	NA	2	2	2	2	10	7	7	1	NA	3	3	NA	NA	1800	NA	NA	NA	1	1800	4	4
886	143169112366204	4	1	44	4	4	5	2	60234	5	3	3	3	60	4	2	2	19	10	9	1	10	3	3	3	3	1	NA	2	2	2	2	11	8	8	3	0	5	5	NA	NA	NA	NA	3500	NA	2	1750	4	2
887	143169112432655	4	2	50	5	5	6	4	38261	4	2	1	4	38	8	5	2	22	3	3	1	22	5	5	5	3	1	NA	2	2	2	2	5	4	3	2	0	1	1	500	NA	NA	NA	NA	NA	1.5	333.333333333333	6	1
888	143169112444950	4	1	44	4	4	5	2	59056	1	1	6	1	59	2	2	2	17	10	9	1	20	5	5	5	3	1	NA	2	2	2	2	10	7	7	3	0	6	6	NA	NA	NA	NA	NA	4150	2	2075	3	4
889	143169112455195	4	2	45	4	4	5	4	69284	8	4	2	3	69	8	5	2	22	3	3	1	20	5	5	5	3	1	NA	2	2	2	2	6	5	4	6	1	4	4	NA	NA	NA	2800	NA	NA	3.3	848.484848484848	6	1
890	143169112462367	4	2	47	4	4	5	4	92051	9	5	2	10	92	1	1	1	12	8	7	6	9	7	7	8	NA	NA	NA	8	8	NA	2	11	8	8	5	0	6	6	NA	NA	NA	NA	NA	8500	3	2833.33333333333	2	1
891	143169112463395	4	1	38	4	4	4	2	10210	1	1	6	1	10	4	2	2	8	1	1	1	17	4	4	4	3	1	NA	2	2	2	2	10	7	7	2	1	4	4	NA	NA	NA	2000	NA	NA	1.3	1538.46153846154	4	3
892	143169112464422	4	2	43	4	4	5	4	87136	1	1	6	12	87	7	4	2	14	2	2	1	20	5	5	5	3	1	NA	2	2	2	2	10	7	7	4	0	5	5	NA	NA	NA	NA	3300	NA	2.5	1320	4	1
893	143169112485933	4	2	48	4	4	5	4	35126	3	2	5	5	35	6	3	2	6	5	5	1	21	5	5	5	3	1	NA	2	2	2	2	9	6	6	1	NA	2	2	NA	1400	NA	NA	NA	NA	1	1400	4	3
894	143169112487985	4	2	54	5	5	6	4	83144	8	4	3	8	83	9	5	2	21	13	12	1	22	5	5	5	9	1	NA	2	2	2	2	8	6	5	1	NA	4	4	NA	NA	NA	2200	NA	NA	1	2200	3	3
895	143169112561729	4	1	63	5	5	7	2	91521	9	5	4	8	91	1	1	1	12	8	7	6	7	7	7	8	NA	NA	NA	8	8	NA	2	10	7	7	5	0	4	4	NA	NA	NA	2200	NA	NA	3	733.333333333333	6	2
896	143169112603728	4	1	61	5	5	7	2	38229	8	4	2	7	38	8	5	2	22	3	3	1	7	3	3	3	4	2	NA	2	3	3	2	11	8	8	1	NA	6	6	NA	NA	NA	NA	NA	4500	1	4500	1	3
897	143169112610898	4	1	34	3	3	4	1	80031	1	1	6	1	80	4	2	2	19	10	9	1	11	4	4	4	5	2	2	3	5	4	2	11	8	8	4	2	6	6	NA	NA	NA	NA	NA	4300	2.1	2047.61904761905	3	1
898	143169112616020	4	2	45	4	4	5	4	75111	9	5	1	11	75	1	1	1	12	8	7	1	16	4	4	4	6	2	3	3	4	4	1	11	1	8	2	0	7	7	NA	NA	NA	NA	NA	NA	NA	NA	NA	1
899	143169112616021	4	2	32	3	3	4	3	17245	1	1	6	1	17	6	3	2	20	2	2	1	12	4	4	4	7	2	2	3	5	4	2	10	7	7	4	2	4	4	NA	NA	NA	2900	NA	NA	2.1	1380.95238095238	4	1
900	143169112678497	4	1	37	4	4	4	2	11279	2	2	5	3	11	9	5	2	13	9	8	1	2	2	2	2	1	3	NA	1	1	1	2	6	5	4	4	2	6	6	NA	NA	NA	NA	NA	9000	2.1	4285.71428571429	1	1
901	143169112788087	4	1	49	4	4	5	2	75120	9	5	1	11	75	1	1	1	12	8	7	1	12	4	4	4	3	1	NA	2	2	2	2	10	7	7	1	NA	4	4	NA	NA	NA	2950	NA	NA	1	2950	2	3
902	143169112788089	4	2	58	5	5	6	4	32065	1	1	6	1	32	7	4	2	16	9	8	6	10	7	7	8	NA	NA	NA	8	8	NA	2	10	7	7	2	0	2	2	NA	1200	NA	NA	NA	NA	1.5	800	6	1
903	143169112882177	4	2	55	5	5	6	4	15268	1	1	6	2	15	8	5	2	3	3	3	1	18	5	5	5	6	2	2	3	5	4	2	8	6	5	1	NA	3	3	NA	NA	1700	NA	NA	NA	1	1700	4	3
904	143169112886277	4	2	59	5	5	6	4	86292	1	1	6	1	86	6	3	2	20	2	2	1	24	6	6	6	3	1	NA	2	2	2	2	10	7	7	2	0	5	5	NA	NA	NA	NA	3200	NA	1.5	2133.33333333333	3	1
905	143169112909841	4	2	50	5	5	6	4	69248	3	2	5	5	69	8	5	2	22	3	3	1	12	4	4	4	3	1	NA	2	2	2	2	7	5	4	2	0	5	5	NA	NA	NA	NA	3300	NA	1.5	2200	3	1
906	143169112910867	4	2	39	4	4	4	4	87034	1	1	6	1	87	7	4	2	14	2	2	1	15	4	4	4	3	1	NA	2	2	2	2	10	7	7	3	0	6	6	NA	NA	NA	NA	NA	4000	2	2000	3	1
907	143169112910868	4	2	48	4	4	5	4	64057	1	1	6	2	64	7	4	2	2	2	2	1	12	4	4	4	7	2	1	3	5	4	2	9	6	6	2	0	7	7	NA	NA	NA	NA	NA	NA	NA	NA	NA	1
908	143169112924190	4	2	45	4	4	5	4	38144	2	2	5	3	38	8	5	2	22	3	3	1	22	5	5	5	3	1	NA	2	2	2	2	8	6	5	3	0	4	4	NA	NA	NA	2990	NA	NA	2	1495	4	1
909	143169112973362	4	1	36	4	4	4	2	69387	8	4	1	11	69	8	5	2	22	3	3	1	15	4	4	4	3	1	NA	2	2	2	2	11	8	8	1	NA	4	4	NA	NA	NA	2200	NA	NA	1	2200	3	4
910	143169112977463	4	2	56	5	5	6	4	75111	9	5	1	11	75	1	1	1	12	8	7	1	3	2	2	2	1	3	NA	1	1	1	2	8	6	5	1	NA	1	1	400	NA	NA	NA	NA	NA	1	400	6	4
911	143169112978488	4	1	40	4	4	5	2	44206	1	1	6	2	44	6	3	2	18	12	11	1	12	4	4	4	3	1	NA	2	2	2	2	11	8	8	5	3	5	5	NA	NA	NA	NA	3800	NA	2.4	1583.33333333333	4	1
912	143169112978489	4	1	42	4	4	5	2	64430	4	2	1	7	64	7	4	2	2	2	2	6	30	10	7	8	NA	NA	NA	8	8	NA	2	8	6	5	1	NA	2	2	NA	1250	NA	NA	NA	NA	1	1250	5	4
913	143169113027651	4	2	44	4	4	5	4	3095	6	3	1	7	3	8	5	2	3	3	3	1	14	4	4	4	5	2	3	3	4	4	1	10	1	7	4	1	3	3	NA	NA	1999	NA	NA	NA	2.3	869.130434782609	6	1
914	143169113087052	4	1	55	5	5	6	2	20148	4	2	7	5	20	9	5	2	9	7	12	7	21	8	7	8	NA	NA	NA	8	8	NA	2	10	7	7	2	0	6	6	NA	NA	NA	NA	NA	4050	1.5	2700	2	1
915	143169113107545	4	2	54	5	5	6	4	72264	4	2	1	7	72	6	3	2	18	12	11	1	20	5	5	5	3	1	NA	2	2	2	2	8	6	5	1	NA	3	3	NA	NA	1800	NA	NA	NA	1	1800	4	3
916	143169113134179	4	2	50	5	5	6	4	89342	1	1	6	1	89	4	2	2	5	4	4	2	28	6	6	6	3	1	NA	5	7	5	2	7	5	4	1	NA	2	2	NA	1254	NA	NA	NA	NA	1	1254	5	3
917	143169113285751	4	2	53	5	5	6	4	1385	2	2	3	1	1	8	5	2	22	3	3	1	22	5	5	5	1	3	NA	1	1	1	2	10	7	7	4	1	5	5	NA	NA	NA	NA	3500	NA	2.3	1521.73913043478	4	1
918	143169113526399	4	1	32	3	3	4	1	54586	1	1	6	1	54	3	2	2	15	1	1	7	24	8	7	8	NA	NA	NA	8	8	NA	2	6	5	4	2	0	3	3	NA	NA	1600	NA	NA	NA	1.5	1066.66666666667	5	3
919	143169113552907	4	2	64	5	5	7	4	33323	1	1	6	1	33	7	4	2	2	2	2	1	12	4	4	4	7	2	2	3	5	4	2	10	7	7	2	0	7	7	NA	NA	NA	NA	NA	NA	NA	NA	NA	1
920	143169113591833	4	2	60	5	5	7	4	77019	1	1	6	1	77	1	1	1	12	8	7	7	22	8	7	8	NA	NA	NA	8	8	NA	2	4	3	2	5	1	4	4	NA	NA	NA	2300	NA	NA	2.8	821.428571428571	6	1
921	143169113599004	4	1	34	3	3	4	1	39121	1	1	6	1	39	3	2	2	10	4	4	1	12	4	4	4	3	1	NA	2	2	2	2	6	5	4	1	NA	2	2	NA	1200	NA	NA	NA	NA	1	1200	5	3
922	143169113632814	4	1	59	5	5	6	2	27602	6	3	3	5	27	5	3	2	11	11	10	1	11	4	4	4	5	2	2	3	5	4	2	10	7	7	2	0	6	6	NA	NA	NA	NA	NA	5100	1.5	3400	1	1
923	143169113665591	4	2	44	4	4	5	4	13097	4	2	5	7	13	9	5	2	21	13	12	1	26	6	6	6	3	1	NA	2	2	2	2	10	7	7	1	NA	2	2	NA	1300	NA	NA	NA	NA	1	1300	5	2
924	143169113717838	4	2	43	4	4	5	4	76156	1	1	6	1	76	5	3	2	11	11	10	6	17	7	7	8	NA	NA	NA	8	8	NA	2	8	6	5	4	2	3	3	NA	NA	1680	NA	NA	NA	2.1	800	6	1
925	143169113747551	4	2	49	4	4	5	4	92063	9	5	2	10	92	1	1	1	12	8	7	6	9	7	7	8	NA	NA	NA	8	8	NA	1	11	1	8	5	0	7	7	NA	NA	NA	NA	NA	NA	NA	NA	NA	1
926	143169113765995	4	2	50	5	5	6	4	81065	6	3	1	9	81	7	4	2	16	9	8	1	20	5	5	5	3	1	NA	2	2	2	2	10	7	7	3	0	5	5	NA	NA	NA	NA	3800	NA	2	1900	3	1
927	143169113776237	4	1	23	2	2	3	1	89387	5	3	1	8	89	4	2	2	5	4	4	5	NA	9	8	8	NA	NA	NA	6	8	NA	1	10	1	7	3	0	4	4	NA	NA	NA	2500	NA	NA	2	1250	5	3
928	143169113807998	4	2	47	4	4	5	4	13098	8	4	2	5	13	9	5	2	21	13	12	1	26	6	6	6	3	1	NA	2	2	2	2	6	5	4	7	3	4	4	NA	NA	NA	2500	NA	NA	3.4	735.294117647059	6	1
929	143169114980423	4	1	50	5	5	6	2	60068	2	2	1	3	60	4	2	2	19	10	9	6	23	8	7	8	NA	NA	NA	8	8	NA	2	7	5	4	1	NA	1	1	400	NA	NA	NA	NA	NA	1	400	6	3
930	143169115044951	4	2	29	3	3	3	3	93010	9	5	4	10	93	1	1	1	12	8	7	1	18	5	5	5	4	2	NA	2	3	3	2	8	6	5	2	0	7	7	NA	NA	NA	NA	NA	NA	NA	NA	NA	1
931	143169115209830	4	1	35	4	4	4	2	44109	8	4	1	11	44	6	3	2	18	12	11	1	16	4	4	4	3	1	NA	2	2	2	1	11	1	8	3	1	5	5	NA	NA	NA	NA	3600	NA	1.8	2000	3	1
932	143169115211882	4	2	34	3	3	4	3	77176	5	3	3	3	77	1	1	1	12	8	7	1	25	6	6	6	3	1	NA	2	2	2	2	8	6	5	4	2	5	5	NA	NA	NA	NA	3900	NA	2.1	1857.14285714286	4	1
933	143169115375623	4	1	44	4	4	5	2	63113	8	4	1	11	63	8	5	2	3	3	3	2	9	3	3	3	3	1	NA	5	7	5	2	10	7	7	5	1	3	3	NA	NA	1547	NA	NA	NA	2.8	552.5	6	1
934	143169115375625	4	1	44	4	4	5	2	77085	9	5	2	4	77	1	1	1	12	8	7	1	17	4	4	4	3	1	NA	2	2	2	2	11	8	8	1	NA	5	5	NA	NA	NA	NA	3500	NA	1	3500	1	2
935	143169115453459	4	1	37	4	4	4	2	22054	2	2	5	4	22	6	3	2	6	5	5	6	30	10	7	8	NA	NA	NA	8	8	NA	2	8	6	5	3	1	1	1	150	NA	NA	NA	NA	NA	1.8	83.3333333333333	6	1
936	143169115718691	4	2	49	4	4	5	4	1103	2	2	2	2	1	8	5	2	22	3	3	3	7	7	7	7	NA	NA	NA	7	8	NA	1	11	1	8	3	1	4	4	NA	NA	NA	2800	NA	NA	1.8	1555.55555555556	4	1
937	143169115771942	4	2	51	5	5	6	4	91021	9	5	3	7	91	1	1	1	12	8	7	1	18	5	5	5	4	2	NA	2	3	3	2	6	5	4	2	0	7	7	NA	NA	NA	NA	NA	NA	NA	NA	NA	4
938	143169116027971	4	1	59	5	5	6	2	77285	9	5	4	8	77	1	1	1	12	8	7	1	17	4	4	4	3	1	NA	2	2	2	2	6	5	4	3	0	4	4	NA	NA	NA	2400	NA	NA	2	1200	5	1
939	143169116127325	4	1	28	3	3	3	1	31555	8	4	1	11	31	7	4	2	16	9	8	2	23	6	6	6	4	2	NA	5	7	5	2	9	6	6	5	3	4	4	NA	NA	NA	2500	NA	NA	2.4	1041.66666666667	5	1
940	143169116131423	4	2	40	4	4	5	4	27375	5	3	1	7	27	5	3	2	11	11	10	1	1	1	1	1	1	3	NA	1	1	1	2	7	5	4	5	3	3	3	NA	NA	1600	NA	NA	NA	2.4	666.666666666667	6	1
941	143169116210176	4	1	52	5	5	6	2	44063	4	2	1	4	44	6	3	2	18	12	11	1	17	4	4	4	3	1	NA	2	2	2	2	7	5	4	5	0	5	5	NA	NA	NA	NA	3700	NA	3	1233.33333333333	5	1
942	143169116288050	4	1	63	5	5	7	2	44009	8	4	2	5	44	6	3	2	18	12	11	1	3	2	2	2	1	3	NA	1	1	1	2	11	8	8	4	1	4	4	NA	NA	NA	2500	NA	NA	2.3	1086.95652173913	5	1
943	143169116295226	4	1	28	3	3	3	1	91103	9	5	3	8	91	1	1	1	12	8	7	1	18	5	5	5	1	3	NA	1	1	1	1	10	1	7	2	0	5	5	NA	NA	NA	NA	3500	NA	1.5	2333.33333333333	3	1
944	143169116363880	4	1	60	5	5	7	2	42187	6	3	1	9	42	8	5	2	22	3	3	1	14	4	4	4	5	2	2	3	5	4	2	8	6	5	2	0	6	6	NA	NA	NA	NA	NA	5000	1.5	3333.33333333333	1	1
945	143169116466232	4	1	28	3	3	3	1	44109	8	4	1	11	44	6	3	2	18	12	11	1	20	5	5	5	9	1	NA	2	2	2	1	11	1	8	3	1	5	5	NA	NA	NA	NA	3900	NA	1.8	2166.66666666667	3	1
946	143169116491849	4	2	59	5	5	6	4	6031	8	4	2	2	6	9	5	2	21	13	12	4	NA	10	8	8	NA	NA	NA	5	8	5	2	10	7	7	2	0	4	4	NA	NA	NA	2656	NA	NA	1.5	1770.66666666667	4	1
947	143169116724242	4	1	53	5	5	6	2	31573	2	2	5	4	31	7	4	2	16	9	8	2	14	4	4	4	5	2	3	5	7	5	2	11	8	8	1	NA	3	3	NA	NA	1600	NA	NA	NA	1	1600	4	2
948	143169117016188	4	2	48	4	4	5	4	90010	6	3	1	9	90	3	2	2	10	4	4	1	27	6	6	6	3	1	NA	2	2	2	2	9	6	6	3	1	1	1	800	NA	NA	NA	NA	NA	1.8	444.444444444444	6	1
949	143169117077594	4	2	40	4	4	5	4	77296	9	5	3	7	77	1	1	1	12	8	7	1	14	4	4	4	6	2	2	3	5	4	2	3	2	1	3	1	3	3	NA	NA	1900	NA	NA	NA	1.8	1055.55555555556	5	1
950	143169117251617	4	2	35	4	4	4	4	76735	1	1	6	1	76	5	3	2	11	11	10	6	22	8	7	8	NA	NA	NA	8	8	NA	2	9	6	6	3	1	3	3	NA	NA	1800	NA	NA	NA	1.8	1000	5	1
951	143169117540422	4	2	40	4	4	5	4	38100	2	2	5	3	38	8	5	2	22	3	3	1	22	5	5	5	3	1	NA	2	2	2	2	10	7	7	3	1	4	4	NA	NA	NA	2900	NA	NA	1.8	1611.11111111111	4	1
952	143169117688904	4	1	28	3	3	3	1	94044	9	5	3	8	94	1	1	1	12	8	7	7	30	10	7	8	NA	NA	NA	8	8	NA	2	5	4	3	1	NA	2	2	NA	1004	NA	NA	NA	NA	1	1004	5	3
953	143169117715483	4	2	48	4	4	5	4	44013	1	1	6	3	44	6	3	2	18	12	11	1	11	4	4	4	5	2	2	3	5	4	2	9	6	6	6	1	4	4	NA	NA	NA	2999	NA	NA	3.3	908.787878787879	5	1
954	143169117730847	4	2	39	4	4	4	4	76157	8	4	4	7	76	5	3	2	11	11	10	6	1	7	7	8	NA	NA	NA	8	8	NA	2	1	2	1	5	3	7	7	NA	NA	NA	NA	NA	NA	NA	NA	NA	2
955	143169117757536	4	2	35	4	4	4	4	77037	3	2	1	5	77	1	1	1	12	8	7	1	21	5	5	5	3	1	NA	2	2	2	2	11	8	8	1	NA	2	2	NA	1295	NA	NA	NA	NA	1	1295	5	3
956	143169117807701	4	2	60	5	5	7	4	49331	4	2	5	7	49	6	3	2	18	12	11	3	21	8	7	7	NA	NA	NA	7	8	NA	2	6	5	4	2	0	4	4	NA	NA	NA	2200	NA	NA	1.5	1466.66666666667	4	1
957	143169117826067	4	1	40	4	4	5	2	75119	9	5	1	11	75	1	1	1	12	8	7	2	20	5	5	5	3	1	NA	5	7	5	2	9	6	6	3	0	1	1	900	NA	NA	NA	NA	NA	2	450	6	4
958	143169117829154	4	2	27	3	3	3	3	62458	1	1	6	2	62	2	2	2	17	10	9	6	22	8	7	8	NA	NA	NA	8	8	NA	2	7	5	4	4	2	4	4	NA	NA	NA	2200	NA	NA	2.1	1047.61904761905	5	1
959	143169117843510	4	2	54	5	5	6	4	68354	1	1	6	1	68	3	2	2	1	1	1	1	16	4	4	4	3	1	NA	2	2	2	2	9	6	6	2	0	6	6	NA	NA	NA	NA	NA	4600	1.5	3066.66666666667	2	1
960	143169117851740	4	2	44	4	4	5	4	17300	7	4	1	10	17	6	3	2	20	2	2	2	22	5	5	5	3	1	NA	5	7	5	2	10	7	7	2	1	1	1	900	NA	NA	NA	NA	NA	1.3	692.307692307692	6	3
961	143169117857914	4	1	55	5	5	6	2	40065	4	2	1	5	40	7	4	2	2	2	2	7	22	8	7	8	NA	NA	NA	8	8	NA	2	8	6	5	1	NA	3	3	NA	NA	1700	NA	NA	NA	1	1700	4	3
962	143169117860870	4	2	46	4	4	5	4	83023	5	3	1	7	83	9	5	2	21	13	12	1	27	6	6	6	3	1	NA	2	2	2	2	9	6	6	4	1	4	4	NA	NA	NA	2500	NA	NA	2.3	1086.95652173913	5	1
963	143169117876280	4	1	32	3	3	4	1	78073	9	5	2	7	78	1	1	1	12	8	7	1	16	4	4	4	3	1	NA	2	2	2	2	10	7	7	4	2	5	5	NA	NA	NA	NA	3200	NA	2.1	1523.80952380952	4	1
964	143169117876283	4	1	33	3	3	4	1	95288	9	5	2	5	95	1	1	1	12	8	7	1	6	3	3	3	6	2	3	3	4	4	2	11	8	8	3	1	3	3	NA	NA	1990	NA	NA	NA	1.8	1105.55555555556	5	1
965	143169117878340	4	2	18	2	2	2	3	72278	1	1	6	1	72	6	3	2	18	12	11	5	NA	9	8	8	NA	NA	NA	6	8	NA	1	10	1	7	4	1	7	7	NA	NA	NA	NA	NA	NA	NA	NA	NA	1
966	143169117880397	4	1	62	5	5	7	2	44079	1	1	6	3	44	6	3	2	18	12	11	1	18	5	5	5	6	2	2	3	5	4	2	6	5	4	4	2	5	5	NA	NA	NA	NA	3400	NA	2.1	1619.04761904762	4	1
967	143169117882455	4	2	38	4	4	4	4	2086	1	1	6	2	2	4	2	2	19	10	9	2	12	4	4	4	7	2	3	5	7	5	2	8	6	5	4	2	4	4	NA	NA	NA	2200	NA	NA	2.1	1047.61904761905	5	1
968	143229588859916	4	1	46	4	4	5	2	35179	1	1	6	4	35	6	3	2	6	5	5	1	19	5	5	5	6	2	2	3	5	4	2	9	6	6	3	1	4	4	NA	NA	NA	2200	NA	NA	1.8	1222.22222222222	5	3
969	143229589154867	4	1	57	5	5	6	2	61001	5	3	1	8	61	5	3	2	4	11	10	1	10	3	3	3	3	1	NA	2	2	2	2	10	7	7	2	0	7	7	NA	NA	NA	NA	NA	NA	NA	NA	NA	1
970	143229589257291	4	1	41	4	4	5	2	22050	5	3	1	7	22	6	3	2	6	5	5	1	20	5	5	5	3	1	NA	2	2	2	2	6	5	4	3	1	4	4	NA	NA	NA	2800	NA	NA	1.8	1555.55555555556	4	1
971	143229589368930	4	2	36	4	4	4	4	67180	6	3	1	9	67	3	2	2	1	1	1	1	18	5	5	5	3	1	NA	2	2	2	2	10	7	7	4	2	5	5	NA	NA	NA	NA	3200	NA	2.1	1523.80952380952	4	1
972	143229589377124	4	1	41	4	4	5	2	22388	1	1	6	2	22	6	3	2	6	5	5	1	17	4	4	4	3	1	NA	2	2	2	2	8	6	5	1	NA	3	3	NA	NA	1550	NA	NA	NA	1	1550	4	4
973	143229589734420	4	1	51	5	5	6	2	67298	1	1	6	1	67	3	2	2	1	1	1	1	10	3	3	3	3	1	NA	2	2	2	2	8	6	5	4	0	5	5	NA	NA	NA	NA	3800	NA	2.5	1520	4	1
974	143229589746710	4	1	47	4	4	5	2	67038	1	1	6	1	67	3	2	2	1	1	1	1	21	5	5	5	3	1	NA	2	2	2	2	8	6	5	1	NA	2	2	NA	1150	NA	NA	NA	NA	1	1150	5	3
975	143229589777434	4	1	56	5	5	6	2	33252	1	1	6	1	33	7	4	2	2	2	2	1	18	5	5	5	5	2	3	3	4	4	2	6	5	4	4	0	6	6	NA	NA	NA	NA	NA	4800	2.5	1920	3	1
976	143229589894176	4	2	56	5	5	6	4	76029	1	1	6	1	76	5	3	2	11	11	10	1	18	5	5	5	5	2	2	3	5	4	2	7	5	4	2	0	4	4	NA	NA	NA	2900	NA	NA	1.5	1933.33333333333	3	1
977	143229589961767	4	1	48	4	4	5	2	40280	1	1	6	2	40	7	4	2	2	2	2	1	18	5	5	5	5	2	3	3	4	4	2	10	7	7	4	0	6	6	NA	NA	NA	NA	NA	4900	2.5	1960	3	1
978	143229589987373	4	2	48	4	4	5	4	15259	1	1	6	1	15	8	5	2	3	3	3	1	18	5	5	5	5	2	2	3	5	4	2	9	6	6	4	0	5	5	NA	NA	NA	NA	3050	NA	2.5	1220	5	1
979	143229590009906	4	2	62	5	5	7	4	5132	1	1	6	3	5	9	5	2	21	13	12	2	20	5	5	5	3	1	NA	5	7	5	2	8	6	5	2	0	4	4	NA	NA	NA	2500	NA	NA	1.5	1666.66666666667	4	1
980	143229590220871	4	1	60	5	5	7	2	14318	1	1	6	1	14	5	3	2	4	11	10	1	9	3	3	3	3	1	NA	2	2	2	2	3	2	1	2	0	5	5	NA	NA	NA	NA	3900	NA	1.5	2600	2	1
981	143229590281299	4	1	57	5	5	6	2	68368	1	1	6	2	68	3	2	2	1	1	1	1	20	5	5	5	4	2	NA	2	3	3	2	6	5	4	3	0	4	4	NA	NA	NA	2900	NA	NA	2	1450	4	4
982	143229590391905	4	2	61	5	5	7	4	42041	1	1	6	1	42	8	5	2	22	3	3	1	10	3	3	3	3	1	NA	2	2	2	2	10	7	7	2	0	5	5	NA	NA	NA	NA	3999	NA	1.5	2666	2	1
983	143229590854694	4	1	45	4	4	5	2	42165	2	2	5	3	42	8	5	2	22	3	3	1	20	5	5	5	3	1	NA	2	2	2	2	6	5	4	5	3	3	3	NA	NA	1650	NA	NA	NA	2.4	687.5	6	2
984	143229591100506	4	1	58	5	5	6	2	67014	1	1	6	12	67	3	2	2	1	1	1	1	20	5	5	5	3	1	NA	2	2	2	2	7	5	4	2	0	4	4	NA	NA	NA	2900	NA	NA	1.5	1933.33333333333	3	1
985	143229591236735	4	1	38	4	4	4	2	38425	6	3	4	5	38	8	5	2	22	3	3	1	19	5	5	5	5	2	2	3	5	4	2	8	6	5	5	2	6	6	NA	NA	NA	NA	NA	4800	2.6	1846.15384615385	4	1
986	143229591247875	4	2	37	4	4	4	4	29031	2	2	5	4	29	6	3	2	6	5	5	1	5	3	3	3	3	1	NA	2	2	2	2	9	6	6	3	1	4	4	NA	NA	NA	2990	NA	NA	1.8	1661.11111111111	4	1
987	143229591492732	4	1	40	4	4	5	2	17351	1	1	6	2	17	6	3	2	20	2	2	1	9	3	3	3	3	1	NA	2	2	2	2	8	6	5	4	2	5	5	NA	NA	NA	NA	3700	NA	2.1	1761.90476190476	4	1
988	143229591701602	4	1	47	4	4	5	2	54521	5	3	3	2	54	3	2	2	15	1	1	1	18	5	5	5	5	2	3	3	4	4	2	9	6	6	1	NA	5	5	NA	NA	NA	NA	3500	NA	1	3500	1	4
989	143229591704683	4	1	46	4	4	5	2	57020	1	1	6	1	57	3	2	2	15	1	1	1	9	3	3	3	3	1	NA	2	2	2	2	10	7	7	4	2	5	5	NA	NA	NA	NA	3500	NA	2.1	1666.66666666667	4	1
990	143232740047908	4	1	51	5	5	6	2	33490	1	1	6	2	33	7	4	2	2	2	2	1	10	3	3	3	3	1	NA	2	2	2	2	10	7	7	4	0	6	6	NA	NA	NA	NA	NA	4001	2.5	1600.4	4	1
991	143232740167725	4	2	50	5	5	6	4	17480	1	1	6	1	17	6	3	2	20	2	2	1	14	4	4	4	5	2	2	3	5	4	2	7	5	4	4	0	5	5	NA	NA	NA	NA	3200	NA	2.5	1280	5	1
992	143232740739162	4	1	53	5	5	6	2	57534	2	2	1	2	57	3	2	2	15	1	1	1	10	3	3	3	3	1	NA	2	2	2	2	11	8	8	3	1	6	6	NA	NA	NA	NA	NA	6000	1.8	3333.33333333333	1	1
993	143232740964370	4	1	56	5	5	6	2	13103	6	3	1	9	13	9	5	2	21	13	12	1	20	5	5	5	3	1	NA	2	2	2	2	5	4	3	2	0	3	3	NA	NA	1750	NA	NA	NA	1.5	1166.66666666667	5	1
994	143232741096500	4	2	54	5	5	6	4	39073	1	1	6	1	39	3	2	2	10	4	4	2	20	5	5	5	3	1	NA	5	7	5	2	10	7	7	2	0	5	5	NA	NA	NA	NA	3100	NA	1.5	2066.66666666667	3	1
995	143232741265514	4	1	52	5	5	6	2	57511	1	1	6	2	57	3	2	2	15	1	1	1	7	3	3	3	5	2	2	3	5	4	2	11	8	8	2	0	5	5	NA	NA	NA	NA	3900	NA	1.5	2600	2	1
996	143232741307514	4	2	55	5	5	6	4	68156	5	3	3	3	68	3	2	2	1	1	1	1	10	3	3	3	3	1	NA	2	2	2	1	10	1	7	2	0	6	6	NA	NA	NA	NA	NA	7000	1.5	4666.66666666667	1	1
997	143232741328899	4	2	59	5	5	6	4	17098	1	1	6	1	17	6	3	2	20	2	2	2	20	5	5	5	3	1	NA	5	7	5	2	8	6	5	2	0	1	1	850	NA	NA	NA	NA	NA	1.5	566.666666666667	6	3
998	143232741397526	4	1	60	5	5	7	2	68175	1	1	6	2	68	3	2	2	1	1	1	1	10	3	3	3	3	1	NA	2	2	2	2	11	8	8	2	0	6	6	NA	NA	NA	NA	NA	4800	1.5	3200	1	1
999	143232741397527	4	2	58	5	5	6	4	55573	1	1	6	2	55	3	2	2	15	1	1	1	18	5	5	5	6	2	4	3	4	4	2	9	6	6	2	0	3	3	NA	NA	1800	NA	NA	NA	1.5	1200	5	1
1000	143232741512254	4	1	52	5	5	6	2	40192	5	3	1	8	40	7	4	2	2	2	2	1	9	3	3	3	3	1	NA	2	2	2	2	11	8	8	1	NA	4	4	NA	NA	NA	2550	NA	NA	1	2550	2	3
1001	143232742013020	4	2	54	5	5	6	4	6101	1	1	6	1	4	9	5	2	21	13	12	1	21	5	5	5	3	1	NA	2	2	2	2	8	6	5	2	0	7	7	NA	NA	NA	NA	NA	NA	NA	NA	NA	1
1002	143233596381286	4	2	60	5	5	7	4	67084	1	1	6	3	67	3	2	2	1	1	1	1	21	5	5	5	3	1	NA	2	2	2	2	9	6	6	2	0	4	4	NA	NA	NA	2300	NA	NA	1.5	1533.33333333333	4	1
1003	143233596598298	4	2	52	5	5	6	4	51230	5	3	1	8	51	4	2	2	8	1	1	1	9	3	3	3	3	1	NA	2	2	2	2	11	8	8	2	0	5	5	NA	NA	NA	NA	3500	NA	1.5	2333.33333333333	3	1
1004	143233597280287	4	2	54	5	5	6	4	33240	3	2	1	5	33	7	4	2	2	2	2	1	22	5	5	5	3	1	NA	2	2	2	2	7	5	4	1	NA	2	2	NA	1100	NA	NA	NA	NA	1	1100	5	4
1005	143233598155797	4	1	59	5	5	6	2	13103	6	3	1	9	13	9	5	2	21	13	12	2	10	3	3	3	3	1	NA	5	7	5	2	10	7	7	2	0	3	3	NA	NA	1900	NA	NA	NA	1.5	1266.66666666667	5	1
1006	145102464584787	9	2	40	4	4	5	4	92076	9	5	2	5	92	1	1	1	12	8	7	1	9	3	3	3	3	1	NA	2	2	2	2	11	8	8	1	NA	5	5	NA	NA	NA	NA	3900	NA	1	3900	1	4
1007	145102464590934	9	1	48	4	4	5	2	85151	3	2	5	5	85	6	3	2	18	12	11	2	16	4	4	4	3	1	NA	5	7	5	2	10	7	7	5	2	5	5	NA	NA	NA	NA	3300	NA	2.6	1269.23076923077	5	1
1008	145102464608350	9	1	58	5	5	6	2	94080	9	5	2	9	94	1	1	1	12	8	7	1	19	5	5	5	5	2	2	3	5	4	2	10	7	7	3	0	6	6	NA	NA	NA	NA	NA	4900	2	2450	3	1
1009	145102464656480	9	2	75	7	6	8	4	26139	6	3	2	3	26	8	5	2	22	3	3	3	9	7	7	7	NA	NA	NA	7	8	NA	2	10	7	7	1	NA	3	3	NA	NA	1850	NA	NA	NA	1	1850	4	3
1010	145102464727153	9	1	39	4	4	4	2	21231	8	4	1	11	21	4	2	2	5	4	4	1	24	6	6	6	3	1	NA	2	2	2	2	7	5	4	1	NA	2	2	NA	1335	NA	NA	NA	NA	1	1335	4	4
1011	145102464733301	9	1	54	5	5	6	2	42218	8	4	1	11	42	8	5	2	22	3	3	1	12	4	4	4	7	2	2	3	5	4	2	10	7	7	2	0	6	6	NA	NA	NA	NA	NA	4400	1.5	2933.33333333333	2	1
1012	145102464816249	9	1	45	4	4	5	2	63040	2	2	5	4	63	8	5	2	3	3	3	1	10	3	3	3	3	1	NA	2	2	2	2	11	8	8	5	1	6	6	NA	NA	NA	NA	NA	4400	2.8	1571.42857142857	4	1
1013	145102464828542	9	1	65	6	6	7	2	83129	8	4	3	9	83	9	5	2	21	13	12	3	15	7	7	7	NA	NA	NA	7	8	NA	2	7	5	4	2	0	3	3	NA	NA	1900	NA	NA	NA	1.5	1266.66666666667	5	3
1014	145102464880643	9	2	56	5	5	6	4	40065	4	2	1	5	40	7	4	2	2	2	2	1	20	5	5	5	3	1	NA	2	2	2	2	7	5	4	2	0	4	4	NA	NA	NA	2200	NA	NA	1.5	1466.66666666667	4	1
1015	145102464937997	9	2	64	5	5	7	4	69385	8	4	1	11	69	8	5	2	22	3	3	3	20	8	7	7	NA	NA	NA	7	8	NA	2	6	5	4	2	0	5	5	NA	NA	NA	NA	3300	NA	1.5	2200	3	1
1016	145102464974865	9	2	80	7	6	8	4	75103	9	5	1	11	75	1	1	1	12	8	7	3	9	7	7	7	NA	NA	NA	7	8	NA	2	10	7	7	1	NA	3	3	NA	NA	1750	NA	NA	NA	1	1750	4	3
1017	145102464979989	9	2	70	6	6	8	4	39056	1	1	6	2	39	3	2	2	10	4	4	3	23	8	7	7	NA	NA	NA	7	8	NA	2	4	3	2	2	0	4	4	NA	NA	NA	2700	NA	NA	1.5	1800	4	1
1018	145102465062942	9	1	75	7	6	8	2	74192	1	1	6	2	74	8	5	2	22	3	3	3	14	7	7	7	NA	NA	NA	7	8	NA	2	11	8	8	2	0	6	6	NA	NA	NA	NA	NA	4000	1.5	2666.66666666667	2	1
1019	145102465068065	9	2	42	4	4	5	4	77122	9	5	3	8	77	1	1	1	12	8	7	1	9	3	3	3	3	1	NA	2	2	2	2	11	8	8	4	1	6	6	NA	NA	NA	NA	NA	5500	2.3	2391.30434782609	3	1
1020	145102465074211	9	2	57	5	5	6	4	66213	8	4	4	5	66	9	5	2	13	9	8	1	9	3	3	3	4	2	NA	2	3	3	2	8	6	5	1	NA	5	5	NA	NA	NA	NA	3100	NA	1	3100	2	3
1021	145102465223749	9	2	56	5	5	6	4	16089	5	3	3	4	16	6	3	2	20	2	2	1	14	4	4	4	5	2	2	3	5	4	2	8	6	5	1	NA	4	4	NA	NA	NA	2520	NA	NA	1	2520	2	3
1022	145102465226823	9	1	69	6	6	7	2	72176	2	2	5	4	72	6	3	2	18	12	11	3	9	7	7	7	NA	NA	NA	7	8	NA	2	4	3	2	1	NA	4	4	NA	NA	NA	2999	NA	NA	1	2999	2	3
1023	145102465245259	9	2	45	4	4	5	4	81281	1	1	6	3	81	7	4	2	16	9	8	1	21	5	5	5	3	1	NA	2	2	2	2	11	8	8	3	1	4	4	NA	NA	NA	2000	NA	NA	1.8	1111.11111111111	5	1
1024	145102465381464	9	2	73	6	6	8	4	21561	1	1	6	1	21	4	2	2	5	4	4	3	12	7	7	7	NA	NA	NA	7	8	NA	2	10	7	7	1	NA	4	4	NA	NA	NA	2800	NA	NA	1	2800	2	4
1025	145102465393757	9	1	65	6	6	7	2	93048	9	5	4	11	93	1	1	1	12	8	7	1	20	5	5	5	3	1	NA	2	2	2	2	8	6	5	2	0	5	5	NA	NA	NA	NA	3200	NA	1.5	2133.33333333333	3	1
1026	145102465399903	9	2	58	5	5	6	4	59153	8	4	4	6	59	2	2	2	17	10	9	6	26	8	7	8	NA	NA	NA	8	8	NA	2	2	2	1	5	0	7	7	NA	NA	NA	NA	NA	NA	NA	NA	NA	1
1027	145102465405024	9	2	31	3	3	4	3	27003	5	3	3	2	27	5	3	2	11	11	10	6	20	8	7	8	NA	NA	NA	8	8	NA	2	10	7	7	4	2	7	7	NA	NA	NA	NA	NA	NA	NA	NA	NA	1
1028	145102465479780	9	1	46	4	4	5	2	57463	8	4	1	11	57	3	2	2	15	1	1	1	14	4	4	4	4	2	NA	2	3	3	2	11	8	8	4	1	4	4	NA	NA	NA	2500	NA	NA	2.3	1086.95652173913	5	3
1029	145102465533031	9	2	32	3	3	4	3	85109	4	2	5	7	85	6	3	2	18	12	11	1	22	5	5	5	3	1	NA	2	2	2	2	9	6	6	4	2	5	5	NA	NA	NA	NA	3300	NA	2.1	1571.42857142857	4	1
1030	145102465540203	9	2	62	5	5	7	4	60057	6	3	1	10	60	4	2	2	19	10	9	3	18	8	7	7	NA	NA	NA	7	8	NA	2	4	3	2	1	NA	3	3	NA	NA	1530	NA	NA	NA	1	1530	4	3
1031	145102465546352	9	1	42	4	4	5	2	59336	2	2	1	2	59	2	2	2	17	10	9	1	12	4	4	4	3	1	NA	2	2	2	2	7	5	4	2	0	4	4	NA	NA	NA	2400	NA	NA	1.5	1600	4	1
1032	145102465549426	9	2	25	3	3	3	3	56260	6	3	1	10	56	6	3	2	6	5	5	1	12	4	4	4	2	4	NA	2	1	1	2	10	7	7	2	0	5	5	NA	NA	NA	NA	3687	NA	1.5	2458	3	1
1033	145102465554551	9	2	79	7	6	8	4	78361	9	5	4	9	78	1	1	1	12	8	7	3	14	7	7	7	NA	NA	NA	7	8	NA	2	8	6	5	2	0	7	7	NA	NA	NA	NA	NA	NA	NA	NA	NA	1
1034	145102465611896	9	1	60	5	5	7	2	34031	3	2	1	4	34	9	5	2	13	9	8	3	23	8	7	7	NA	NA	NA	7	8	NA	2	7	5	4	2	0	3	3	NA	NA	1995	NA	NA	NA	1.5	1330	4	1
1035	145102465613945	9	1	65	6	6	7	2	94017	9	5	4	10	94	1	1	1	12	8	7	3	21	8	7	7	NA	NA	NA	7	8	NA	2	7	5	4	2	0	7	7	NA	NA	NA	NA	NA	NA	NA	NA	NA	4
1036	145102465649668	9	1	78	7	6	8	2	38538	8	4	2	4	38	8	5	2	22	3	3	3	9	7	7	7	NA	NA	NA	7	8	NA	2	8	6	5	2	0	5	5	NA	NA	NA	NA	3800	NA	1.5	2533.33333333333	2	1
1037	145102465668104	9	2	42	4	4	5	4	57021	8	4	2	2	57	3	2	2	15	1	1	6	7	7	7	8	NA	NA	NA	8	8	NA	2	11	8	8	3	1	1	1	808	NA	NA	NA	NA	NA	1.8	448.888888888889	6	1
1038	145102465683471	9	2	66	6	6	7	4	68150	1	1	6	1	68	3	2	2	1	1	1	3	18	8	7	7	NA	NA	NA	7	8	NA	2	6	5	4	2	0	3	3	NA	NA	1999	NA	NA	NA	1.5	1332.66666666667	4	1
1039	145102465742866	9	2	78	7	6	8	4	27056	4	2	1	7	27	5	3	2	11	11	10	3	15	7	7	7	NA	NA	NA	7	8	NA	2	8	6	5	1	NA	3	3	NA	NA	1600	NA	NA	NA	1	1600	4	3
1040	145102465850390	9	2	24	2	2	3	3	85051	3	2	5	5	85	6	3	2	18	12	11	1	20	5	5	5	3	1	NA	2	2	2	2	10	7	7	2	0	4	4	NA	NA	NA	2500	NA	NA	1.5	1666.66666666667	4	1
1041	145102466184256	9	1	74	6	6	8	2	75113	9	5	1	11	75	1	1	1	12	8	7	3	3	7	7	7	NA	NA	NA	7	8	NA	2	6	5	4	2	0	6	6	NA	NA	NA	NA	NA	6000	1.5	4000	1	1
1042	145102466240586	9	1	86	7	6	8	2	94038	9	5	3	9	94	1	1	1	12	8	7	3	19	8	7	7	NA	NA	NA	7	8	NA	2	6	5	4	2	0	4	4	NA	NA	NA	2800	NA	NA	1.5	1866.66666666667	3	1
1043	145102466309203	9	2	64	5	5	7	4	59277	1	1	6	1	59	2	2	2	17	10	9	3	3	7	7	7	NA	NA	NA	7	8	NA	2	9	6	6	2	0	4	4	NA	NA	NA	2900	NA	NA	1.5	1933.33333333333	3	1
1044	145102466490464	9	2	21	2	2	3	3	6088	8	4	1	11	6	9	5	2	21	13	12	5	NA	9	8	8	NA	NA	NA	6	8	NA	1	8	1	5	1	NA	3	3	NA	NA	1860	NA	NA	NA	1	1860	4	4
1045	145102466546788	9	2	30	3	3	4	3	14325	3	2	1	3	14	5	3	2	4	11	10	1	24	6	6	6	2	4	NA	2	1	1	1	10	1	7	3	1	4	4	NA	NA	NA	2800	NA	NA	1.8	1555.55555555556	4	1
1046	145102467078184	9	2	78	7	6	8	4	33063	8	4	1	11	33	7	4	2	2	2	2	3	5	7	7	7	NA	NA	NA	7	8	NA	2	11	8	8	2	0	6	6	NA	NA	NA	NA	NA	4500	1.5	3000	2	1
1047	145102467130422	9	1	59	5	5	6	2	75105	9	5	1	11	75	1	1	1	12	8	7	1	18	5	5	5	5	2	1	3	5	4	2	11	8	8	2	0	6	6	NA	NA	NA	NA	NA	4500	1.5	3000	2	1
1048	145102467291262	9	2	21	2	2	3	3	63113	8	4	1	11	63	8	5	2	3	3	3	5	NA	9	8	8	NA	NA	NA	6	8	NA	1	10	1	7	1	NA	1	1	700	NA	NA	NA	NA	NA	1	700	6	2
1049	145102467544069	9	1	60	5	5	7	2	37261	8	4	1	11	37	5	3	2	7	6	6	1	12	4	4	4	3	1	NA	2	2	2	2	10	7	7	2	0	4	4	NA	NA	NA	2300	NA	NA	1.5	1533.33333333333	4	3
1050	145102468166680	9	2	77	7	6	8	4	77070	1	1	6	2	77	1	1	1	12	8	7	3	20	8	7	7	NA	NA	NA	7	8	NA	2	5	4	3	2	0	4	4	NA	NA	NA	2700	NA	NA	1.5	1800	4	1
1051	145102468311049	9	2	24	2	2	3	3	62053	1	1	6	1	62	2	2	2	17	10	9	2	27	6	6	6	3	1	NA	5	7	5	2	11	8	8	6	0	5	5	NA	NA	NA	NA	3200	NA	3.5	914.285714285714	5	2
1052	145102468403240	9	2	45	4	4	5	4	45248	2	2	5	3	45	5	3	2	7	6	6	2	20	5	5	5	3	1	NA	5	7	5	2	2	2	1	4	1	4	4	NA	NA	NA	2999	NA	NA	2.3	1303.91304347826	5	1
1053	145102468501544	9	2	31	3	3	4	3	35136	3	2	5	5	35	6	3	2	6	5	5	1	12	4	4	4	3	1	NA	2	2	2	2	9	6	6	4	2	5	5	NA	NA	NA	NA	3200	NA	2.1	1523.80952380952	4	1
1054	145102468521027	9	1	78	7	6	8	2	91228	9	5	4	10	91	1	1	1	12	8	7	3	18	8	7	7	NA	NA	NA	7	8	NA	2	5	4	3	5	0	4	4	NA	NA	NA	2700	NA	NA	3	900	5	3
1055	145102468525128	9	2	29	3	3	3	3	30189	7	4	1	11	30	9	5	2	13	9	8	1	20	5	5	5	9	1	NA	2	2	2	2	8	6	5	2	0	4	4	NA	NA	NA	2400	NA	NA	1.5	1600	4	1
1056	145102468528225	9	1	44	4	4	5	2	91421	9	5	3	8	91	1	1	1	12	8	7	1	16	4	4	4	3	1	NA	2	2	2	2	11	8	8	4	2	4	4	NA	NA	NA	2800	NA	NA	2.1	1333.33333333333	4	3
1057	145102468528234	9	1	55	5	5	6	2	66008	6	3	1	7	66	9	5	2	13	9	8	1	26	6	6	6	3	1	NA	2	2	2	2	10	7	7	1	NA	1	1	910	NA	NA	NA	NA	NA	1	910	5	3
1058	145102468530291	9	2	32	3	3	4	3	56005	2	2	5	3	56	6	3	2	6	5	5	2	21	5	5	5	3	1	NA	5	7	5	2	3	2	1	2	1	2	2	NA	1400	NA	NA	NA	NA	1.3	1076.92307692308	5	3
1059	145110510627935	9	1	74	6	6	8	2	72364	1	1	6	2	72	6	3	2	18	12	11	3	17	7	7	7	NA	NA	NA	7	8	NA	2	10	7	7	2	0	5	5	NA	NA	NA	NA	3800	NA	1.5	2533.33333333333	2	1
1060	145110510685289	9	1	69	6	6	7	2	68298	3	2	1	5	68	3	2	2	1	1	1	3	2	7	7	7	NA	NA	NA	7	8	NA	2	6	5	4	2	0	2	2	NA	1400	NA	NA	NA	NA	1.5	933.333333333333	5	1
1061	145110510700653	9	2	79	7	6	8	4	92024	9	5	4	10	92	1	1	1	12	8	7	3	21	8	7	7	NA	NA	NA	7	8	NA	2	3	2	1	1	NA	7	7	NA	NA	NA	NA	NA	NA	NA	NA	NA	3
1062	145110510700655	9	1	78	7	6	8	2	81004	6	3	1	9	81	7	4	2	16	9	8	3	9	7	7	7	NA	NA	NA	7	8	NA	2	11	8	8	2	0	6	6	NA	NA	NA	NA	NA	8000	1.5	5333.33333333333	1	1
1063	145110510716017	9	1	29	3	3	3	1	17449	5	3	4	5	17	6	3	2	20	2	2	4	NA	10	8	8	NA	NA	NA	5	8	5	2	7	5	4	3	0	1	1	480	NA	NA	NA	NA	NA	2	240	6	4
1064	145110510717042	9	1	40	4	4	5	2	75110	9	5	1	11	75	1	1	1	12	8	7	1	19	5	5	5	1	3	NA	1	1	1	2	10	7	7	3	1	5	5	NA	NA	NA	NA	3800	NA	1.8	2111.11111111111	3	1
1065	145110510750723	9	1	80	7	6	8	2	22330	1	1	6	1	22	6	3	2	6	5	5	3	6	7	7	7	NA	NA	NA	7	8	NA	2	6	5	4	1	NA	3	3	NA	NA	1999	NA	NA	NA	1	1999	3	3
1066	145110510956637	9	1	42	4	4	5	2	11315	2	2	1	2	11	9	5	2	13	9	8	1	26	6	6	6	4	2	NA	2	3	3	2	5	4	3	6	3	2	2	NA	1460	NA	NA	NA	NA	2.9	503.448275862069	6	1
1067	145110511006746	9	1	45	4	4	5	2	51447	1	1	6	1	51	4	2	2	8	1	1	1	24	6	6	6	3	1	NA	2	2	2	2	9	6	6	5	0	5	5	NA	NA	NA	NA	3200	NA	3	1066.66666666667	5	1
1068	145110511040546	9	1	47	4	4	5	2	91174	9	5	4	10	91	1	1	1	12	8	7	1	21	5	5	5	3	1	NA	2	2	2	2	6	5	4	2	0	5	5	NA	NA	NA	NA	3825	NA	1.5	2550	2	1
1069	145110511071280	9	2	76	7	6	8	4	92025	9	5	3	10	92	1	1	1	12	8	7	3	17	7	7	7	NA	NA	NA	7	8	NA	2	5	4	3	1	NA	2	2	NA	1100	NA	NA	NA	NA	1	1100	5	3
1070	145110511071281	9	2	65	6	6	7	4	39126	1	1	6	1	39	3	2	2	10	4	4	3	11	7	7	7	NA	NA	NA	7	8	NA	2	10	7	7	2	0	6	6	NA	NA	NA	NA	NA	4200	1.5	2800	2	1
1071	145110511087667	9	2	30	3	3	4	3	59599	8	4	4	10	59	2	2	2	17	10	9	1	6	3	3	3	5	2	1	3	5	4	1	8	1	5	1	NA	4	4	NA	NA	NA	2500	NA	NA	1	2500	2	3
1072	145110511087670	9	2	76	7	6	8	4	35238	8	4	1	11	35	6	3	2	6	5	5	3	20	8	7	7	NA	NA	NA	7	8	NA	2	6	5	4	1	NA	4	4	NA	NA	NA	2050	NA	NA	1	2050	3	3
1073	145110511098947	9	1	45	4	4	5	2	13103	6	3	1	9	13	9	5	2	21	13	12	1	7	3	3	3	5	2	3	3	4	4	2	10	7	7	4	2	6	6	NA	NA	NA	NA	NA	5300	2.1	2523.80952380952	2	1
1074	145110511107142	9	2	40	4	4	5	4	44016	1	1	6	2	44	6	3	2	18	12	11	1	18	5	5	5	5	2	3	3	4	4	2	8	6	5	2	1	4	4	NA	NA	NA	2995	NA	NA	1.3	2303.84615384615	3	1
1075	145110511122512	9	2	70	6	6	8	4	63099	8	4	3	3	63	8	5	2	3	3	3	3	20	8	7	7	NA	NA	NA	7	8	NA	2	6	5	4	2	0	5	5	NA	NA	NA	NA	3350	NA	1.5	2233.33333333333	3	1
1076	145110511143008	9	1	60	5	5	7	2	94044	9	5	3	8	94	1	1	1	12	8	7	6	2	7	7	8	NA	NA	NA	8	8	NA	2	5	4	3	2	0	3	3	NA	NA	1850	NA	NA	NA	1.5	1233.33333333333	5	2
1077	145110511198276	9	2	61	5	5	7	4	74026	3	2	5	5	74	8	5	2	22	3	3	1	20	5	5	5	3	1	NA	2	2	2	2	7	5	4	1	NA	3	3	NA	NA	1600	NA	NA	NA	1	1600	4	3
1078	145110511237223	9	2	26	3	3	3	3	20130	1	1	7	3	20	9	5	2	9	7	12	1	24	6	6	6	3	1	NA	2	2	2	2	10	7	7	2	0	5	5	NA	NA	NA	NA	3200	NA	1.5	2133.33333333333	3	1
1079	145110511309826	9	2	32	3	3	4	3	20042	4	2	7	5	20	9	5	2	9	7	12	1	30	10	8	8	3	1	NA	2	2	2	2	2	2	1	3	1	2	2	NA	1499	NA	NA	NA	NA	1.8	832.777777777778	6	1
1080	145110511322132	9	1	70	6	6	8	2	26198	6	3	1	9	26	8	5	2	22	3	3	3	9	7	7	7	NA	NA	NA	7	8	NA	2	11	8	8	2	0	5	5	NA	NA	NA	NA	3950	NA	1.5	2633.33333333333	2	1
1081	145110511330333	9	2	75	7	6	8	4	47285	1	1	6	1	47	7	4	2	2	2	2	3	12	7	7	7	NA	NA	NA	7	8	NA	2	8	6	5	2	0	4	4	NA	NA	NA	2800	NA	NA	1.5	1866.66666666667	3	1
1082	145110511331360	9	1	53	5	5	6	2	60395	4	2	5	7	60	4	2	2	19	10	9	1	24	6	6	6	3	1	NA	2	2	2	2	2	2	1	4	1	7	7	NA	NA	NA	NA	NA	NA	NA	NA	NA	3
1083	145110511363109	9	2	77	7	6	8	4	40043	1	1	6	1	40	7	4	2	2	2	2	3	3	7	7	7	NA	NA	NA	7	8	NA	2	8	6	5	1	NA	1	1	950	NA	NA	NA	NA	NA	1	950	5	3
1084	145110511372332	9	2	72	6	6	8	4	6088	8	4	1	11	6	9	5	2	21	13	12	3	9	7	7	7	NA	NA	NA	7	8	NA	2	11	8	8	1	NA	4	4	NA	NA	NA	2500	NA	NA	1	2500	2	2
1085	145110511372336	9	2	78	7	6	8	4	17415	5	3	1	8	17	6	3	2	20	2	2	3	22	8	7	7	NA	NA	NA	7	8	NA	2	6	5	4	2	0	4	4	NA	NA	NA	2350	NA	NA	1.5	1566.66666666667	4	1
1086	145110511663205	9	1	34	3	3	4	1	57067	3	2	2	3	57	3	2	2	15	1	1	1	24	6	6	6	3	1	NA	2	2	2	2	6	5	4	4	2	4	4	NA	NA	NA	2600	NA	NA	2.1	1238.09523809524	5	1
1087	145110511663211	9	1	27	3	3	3	1	15012	5	3	3	5	15	8	5	2	3	3	3	1	12	4	4	4	3	1	NA	2	2	2	2	11	8	8	2	0	4	4	NA	NA	NA	2500	NA	NA	1.5	1666.66666666667	4	1
1088	145110511723557	9	2	18	2	2	2	3	11258	1	1	6	2	11	9	5	2	13	9	8	5	NA	9	8	8	NA	NA	NA	6	8	NA	1	8	1	5	4	0	6	6	NA	NA	NA	NA	NA	4000	2.5	1600	4	4
1089	145110511775853	9	1	69	6	6	7	2	6088	8	4	1	11	6	9	5	2	21	13	12	3	6	7	7	7	NA	NA	NA	7	8	NA	2	11	8	8	2	0	4	4	NA	NA	NA	2450	NA	NA	1.5	1633.33333333333	4	1
1090	145110511786098	9	1	45	4	4	5	2	74208	5	3	1	7	74	8	5	2	22	3	3	1	3	2	2	2	1	3	NA	1	1	1	2	9	6	6	2	0	5	5	NA	NA	NA	NA	3300	NA	1.5	2200	3	1
1091	145110511838216	9	2	57	5	5	6	4	67267	8	4	3	7	67	3	2	2	1	1	1	7	22	8	7	8	NA	NA	NA	8	8	NA	2	6	5	4	2	0	7	7	NA	NA	NA	NA	NA	NA	NA	NA	NA	1
1092	145110511855635	9	2	37	4	4	4	4	50502	5	3	1	7	50	5	3	2	4	11	10	1	1	1	1	1	1	3	NA	1	1	1	2	10	7	7	4	2	3	3	NA	NA	1600	NA	NA	NA	2.1	761.904761904762	6	1
1093	145110511864868	9	1	26	3	3	3	1	75120	9	5	1	11	75	1	1	1	12	8	7	1	23	6	6	6	3	1	NA	2	2	2	2	6	5	4	1	NA	2	2	NA	1270	NA	NA	NA	NA	1	1270	5	4
1094	145110511889462	9	2	55	5	5	6	4	64335	7	4	2	6	64	7	4	2	2	2	2	1	15	4	4	4	3	1	NA	2	2	2	2	10	7	7	3	0	6	6	NA	NA	NA	NA	NA	4000	2	2000	3	1
1095	145110512031792	9	2	19	2	2	2	3	69191	8	4	2	5	69	8	5	2	22	3	3	5	NA	9	8	8	NA	NA	NA	6	8	NA	1	8	1	5	4	0	5	5	NA	NA	NA	NA	3299	NA	2.5	1319.6	4	4
1096	145110512148567	9	1	49	4	4	5	2	91573	9	5	2	7	91	1	1	1	12	8	7	1	20	5	5	5	3	1	NA	2	2	2	2	10	7	7	3	0	6	6	NA	NA	NA	NA	NA	4001	2	2000.5	3	1
1097	145110512148570	9	1	78	7	6	8	2	75109	9	5	1	11	75	1	1	1	12	8	7	3	9	7	7	7	NA	NA	NA	7	8	NA	2	11	8	8	2	0	6	6	NA	NA	NA	NA	NA	7000	1.5	4666.66666666667	1	1
1098	145110512149595	9	1	81	7	6	8	2	45147	8	4	4	8	45	5	3	2	7	6	6	3	9	7	7	7	NA	NA	NA	7	8	NA	2	5	4	3	2	0	6	6	NA	NA	NA	NA	NA	4350	1.5	2900	2	1
1099	145110512174182	9	2	38	4	4	4	4	31555	8	4	1	11	31	7	4	2	16	9	8	1	6	3	3	3	6	2	1	3	5	4	1	10	1	7	4	2	5	5	NA	NA	NA	NA	3200	NA	2.1	1523.80952380952	4	1
1100	145110512179310	9	2	53	5	5	6	4	24037	6	3	1	8	24	7	4	2	2	2	2	1	27	6	6	6	3	1	NA	2	2	2	2	7	5	4	1	NA	1	1	750	NA	NA	NA	NA	NA	1	750	6	3
1101	145110512183407	9	2	78	7	6	8	4	75120	9	5	1	11	75	1	1	1	12	8	7	3	17	7	7	7	NA	NA	NA	7	8	NA	2	10	7	7	1	NA	4	4	NA	NA	NA	2000	NA	NA	1	2000	3	3
1102	145110512183408	9	1	69	6	6	7	2	50099	3	2	1	7	50	5	3	2	4	11	10	3	3	7	7	7	NA	NA	NA	7	8	NA	2	5	4	3	2	0	4	4	NA	NA	NA	2114	NA	NA	1.5	1409.33333333333	4	1
1103	145110512224274	9	1	39	4	4	4	2	33322	8	4	2	5	33	7	4	2	2	2	2	1	29	6	6	6	3	1	NA	2	2	2	2	7	5	4	3	1	5	5	NA	NA	NA	NA	3999	NA	1.8	2221.66666666667	3	1
1104	145110512245802	9	1	43	4	4	5	2	86194	7	4	1	10	86	6	3	2	20	2	2	1	17	4	4	4	3	1	NA	2	2	2	2	10	7	7	2	0	7	7	NA	NA	NA	NA	NA	NA	NA	NA	NA	1
1105	145110512311408	9	2	79	7	6	8	4	19031	6	3	1	9	19	7	4	2	14	2	2	3	5	7	7	7	NA	NA	NA	7	8	NA	2	3	2	1	1	NA	1	1	900	NA	NA	NA	NA	NA	1	900	5	3
1106	145110512372800	9	2	21	2	2	3	3	28373	2	2	5	3	28	5	3	2	7	6	6	5	NA	9	8	8	NA	NA	NA	6	8	NA	1	9	1	6	5	1	7	7	NA	NA	NA	NA	NA	NA	NA	NA	NA	2
1107	145110512401422	9	2	25	3	3	3	3	18206	1	1	6	2	18	5	3	2	7	6	6	2	23	6	6	6	3	1	NA	5	7	5	2	11	8	8	1	NA	1	1	844	NA	NA	NA	NA	NA	1	844	6	4
1108	145110512401436	9	1	30	3	3	4	1	93049	9	5	2	8	93	1	1	1	12	8	7	1	10	3	3	3	3	1	NA	2	2	2	2	11	8	8	1	NA	4	4	NA	NA	NA	2500	NA	NA	1	2500	2	4
1109	145110512426036	9	2	72	6	6	8	4	42165	2	2	5	3	42	8	5	2	22	3	3	3	11	7	7	7	NA	NA	NA	7	8	NA	2	8	6	5	2	0	6	6	NA	NA	NA	NA	NA	6000	1.5	4000	1	1
1110	145110512426037	9	1	28	3	3	3	1	73065	7	4	1	10	73	8	5	2	22	3	3	1	17	4	4	4	3	1	NA	2	2	2	2	11	8	8	5	0	4	4	NA	NA	NA	2900	NA	NA	3	966.666666666667	5	1
1111	145110512426039	9	1	67	6	6	7	2	13104	4	2	1	5	13	9	5	2	21	13	12	3	17	7	7	7	NA	NA	NA	7	8	NA	2	5	4	3	1	NA	3	3	NA	NA	1700	NA	NA	NA	1	1700	4	3
1112	145110512490575	9	1	75	7	6	8	2	26057	6	3	4	7	26	8	5	2	22	3	3	3	24	8	7	7	NA	NA	NA	7	8	NA	2	6	5	4	3	0	4	4	NA	NA	NA	2200	NA	NA	2	1100	5	1
1113	145110512523359	9	2	48	4	4	5	4	92020	9	5	2	9	92	1	1	1	12	8	7	1	14	4	4	4	5	2	2	3	5	4	2	7	5	4	3	1	5	5	NA	NA	NA	NA	3800	NA	1.8	2111.11111111111	3	1
1114	145110512580675	9	1	36	4	4	4	2	68066	6	3	1	10	68	3	2	2	1	1	1	2	28	6	6	6	4	2	NA	5	7	5	2	9	6	6	3	1	4	4	NA	NA	NA	2600	NA	NA	1.8	1444.44444444444	4	1
1115	145110512597079	9	2	33	3	3	4	3	34300	2	2	5	4	34	9	5	2	13	9	8	1	22	5	5	5	9	1	NA	2	2	2	2	9	6	6	4	2	3	3	NA	NA	1990	NA	NA	NA	2.1	947.619047619048	5	1
1116	145110512670750	9	1	76	7	6	8	2	60590	1	1	6	2	60	4	2	2	19	10	9	3	17	7	7	7	NA	NA	NA	7	8	NA	2	8	6	5	2	0	3	3	NA	NA	1600	NA	NA	NA	1.5	1066.66666666667	5	4
1117	145110512683115	9	1	30	3	3	4	1	41018	6	3	1	9	41	5	3	2	7	6	6	1	16	4	4	4	3	1	NA	2	2	2	2	8	6	5	2	0	4	4	NA	NA	NA	2900	NA	NA	1.5	1933.33333333333	3	1
1118	145110512683117	9	2	28	3	3	3	3	30189	7	4	1	11	30	9	5	2	13	9	8	1	20	5	5	5	7	2	1	3	5	4	1	8	1	5	5	2	2	2	NA	1200	NA	NA	NA	NA	2.6	461.538461538462	6	1
1119	145110512703499	9	2	75	7	6	8	4	17385	3	2	5	5	17	6	3	2	20	2	2	3	15	7	7	7	NA	NA	NA	7	8	NA	2	8	6	5	1	NA	3	3	NA	NA	1966	NA	NA	NA	1	1966	3	3
1120	145110512709653	9	2	35	4	4	4	4	54431	5	3	1	7	54	3	2	2	15	1	1	1	20	5	5	5	3	1	NA	2	2	2	2	10	7	7	2	0	7	7	NA	NA	NA	NA	NA	NA	NA	NA	NA	1
1121	145110512709657	9	1	25	3	3	3	1	5178	1	1	6	1	5	9	5	2	21	13	12	1	25	6	6	6	3	1	NA	2	2	2	2	8	6	5	2	0	3	3	NA	NA	1750	NA	NA	NA	1.5	1166.66666666667	5	4
1122	145110512965739	9	1	60	5	5	7	2	76351	8	4	1	11	76	5	3	2	11	11	10	1	9	3	3	3	3	1	NA	2	2	2	2	10	7	7	4	0	7	7	NA	NA	NA	NA	NA	NA	NA	NA	NA	1
1123	145110513035320	9	1	87	7	6	8	2	87114	7	4	3	7	87	7	4	2	14	2	2	3	4	7	7	7	NA	NA	NA	7	8	NA	2	3	2	1	2	0	2	2	NA	1416	NA	NA	NA	NA	1.5	944	5	1
1124	145110513042501	9	1	86	7	6	8	2	14488	3	2	5	6	14	5	3	2	4	11	10	3	15	7	7	7	NA	NA	NA	7	8	NA	2	4	3	2	2	0	4	4	NA	NA	NA	2500	NA	NA	1.5	1666.66666666667	4	1
1125	145110513059917	9	1	62	5	5	7	2	84073	1	1	6	1	84	9	5	2	21	13	12	2	21	5	5	5	3	1	NA	5	7	5	2	6	5	4	2	0	4	4	NA	NA	NA	2500	NA	NA	1.5	1666.66666666667	4	1
1126	145110513066064	9	2	36	4	4	4	4	20307	3	2	7	2	20	9	5	2	9	7	12	1	16	4	4	4	3	1	NA	2	2	2	2	11	8	8	2	0	4	4	NA	NA	NA	2980	NA	NA	1.5	1986.66666666667	3	1
1127	145110513156212	9	1	69	6	6	7	2	38317	8	4	4	7	38	8	5	2	22	3	3	3	8	7	7	7	NA	NA	NA	7	8	NA	2	11	8	8	2	0	7	7	NA	NA	NA	NA	NA	NA	NA	NA	NA	1
1128	145110513184895	9	1	23	2	2	3	1	34172	8	4	1	11	34	9	5	2	13	9	8	1	20	5	5	5	3	1	NA	2	2	2	1	11	1	8	2	0	3	3	NA	NA	1800	NA	NA	NA	1.5	1200	5	1
1129	145110513349727	9	1	33	3	3	4	1	44109	8	4	1	11	44	6	3	2	18	12	11	1	21	5	5	5	9	1	NA	2	2	2	2	11	8	8	2	0	4	4	NA	NA	NA	2800	NA	NA	1.5	1866.66666666667	3	1
1130	145110513349739	9	1	34	3	3	4	1	24053	6	3	3	7	24	7	4	2	2	2	2	1	20	5	5	5	8	2	NA	2	3	3	2	10	7	7	3	1	4	4	NA	NA	NA	2700	NA	NA	1.8	1500	4	1
1131	145110513354865	9	1	79	7	6	8	2	75116	9	5	1	11	75	1	1	1	12	8	7	3	4	7	7	7	NA	NA	NA	7	8	NA	2	11	8	8	2	0	6	6	NA	NA	NA	NA	NA	7999	1.5	5332.66666666667	1	1
1132	145110513357940	9	1	82	7	6	8	2	75116	9	5	1	11	75	1	1	1	12	8	7	3	9	7	7	7	NA	NA	NA	7	8	NA	2	8	6	5	2	0	6	6	NA	NA	NA	NA	NA	6000	1.5	4000	1	1
1133	145110513367159	9	2	55	5	5	6	4	59350	8	4	1	11	59	2	2	2	17	10	9	1	15	4	4	4	3	1	NA	2	2	2	2	9	6	6	2	0	6	6	NA	NA	NA	NA	NA	4480	1.5	2986.66666666667	2	1
1134	145110513373305	9	2	44	4	4	5	4	47071	1	1	6	1	47	7	4	2	2	2	2	1	15	4	4	4	1	3	NA	1	1	1	2	11	8	8	2	0	2	2	NA	1200	NA	NA	NA	NA	1.5	800	6	1
1135	145110513406990	9	1	21	2	2	3	1	34172	8	4	1	11	34	9	5	2	13	9	8	5	NA	9	8	8	NA	NA	NA	6	8	NA	1	8	1	5	2	0	3	3	NA	NA	1650	NA	NA	NA	1.5	1100	5	3
1136	145110513419290	9	2	25	3	3	3	3	60156	6	3	3	3	60	4	2	2	19	10	9	1	6	3	3	3	5	2	2	3	5	4	2	11	8	8	2	0	5	5	NA	NA	NA	NA	3200	NA	1.5	2133.33333333333	3	1
1137	145110513423398	9	1	54	5	5	6	2	87154	4	2	5	7	87	7	4	2	14	2	2	3	19	8	7	7	NA	NA	NA	7	8	NA	2	11	8	8	1	NA	4	4	NA	NA	NA	2350	NA	NA	1	2350	3	3
1138	145110513471540	9	2	23	2	2	3	3	93078	9	5	4	9	93	1	1	1	12	8	7	1	5	3	3	3	7	2	1	3	5	4	1	8	1	5	4	0	5	5	NA	NA	NA	NA	3500	NA	2.5	1400	4	2
1139	145110513665120	9	2	59	5	5	6	4	27416	1	1	6	12	27	5	3	2	11	11	10	1	18	5	5	5	5	2	2	3	5	4	2	9	6	6	2	0	4	4	NA	NA	NA	2800	NA	NA	1.5	1866.66666666667	3	1
1140	145110513682438	9	1	39	4	4	4	2	52331	2	2	1	3	52	4	2	2	8	1	1	1	14	4	4	4	5	2	2	3	5	4	2	5	4	3	3	0	1	1	900	NA	NA	NA	NA	NA	2	450	6	1
1141	145110513691704	9	2	23	2	2	3	3	17197	3	2	1	3	17	6	3	2	20	2	2	1	24	6	6	6	3	1	NA	2	2	2	1	9	1	6	1	NA	2	2	NA	1350	NA	NA	NA	NA	1	1350	4	3
1142	145110513704008	9	1	71	6	6	8	2	92071	9	5	2	7	92	1	1	1	12	8	7	3	7	7	7	7	NA	NA	NA	7	8	NA	2	11	8	8	2	0	5	5	NA	NA	NA	NA	3300	NA	1.5	2200	3	1
1143	145110513737822	9	1	56	5	5	6	2	59005	4	2	3	3	59	2	2	2	17	10	9	1	23	6	6	6	3	1	NA	2	2	2	2	6	5	4	6	0	5	5	NA	NA	NA	NA	3300	NA	3.5	942.857142857143	5	1
1144	145110513773679	9	1	60	5	5	7	2	34032	6	3	1	10	34	9	5	2	13	9	8	7	12	7	7	8	NA	NA	NA	8	8	NA	2	9	6	6	2	0	5	5	NA	NA	NA	NA	3700	NA	1.5	2466.66666666667	2	2
1145	145110514157686	9	2	63	5	5	7	4	87018	1	1	6	1	87	7	4	2	14	2	2	1	27	6	6	6	3	1	NA	2	2	2	2	5	4	3	2	0	4	4	NA	NA	NA	2900	NA	NA	1.5	1933.33333333333	3	3
1146	145110514205753	9	2	55	5	5	6	4	6123	8	4	3	8	6	9	5	2	21	13	12	1	6	3	3	3	5	2	2	3	5	4	2	11	8	8	2	0	6	6	NA	NA	NA	NA	NA	7000	1.5	4666.66666666667	1	1
1147	145110514206784	9	2	77	7	6	8	4	50236	2	2	5	4	50	5	3	2	4	11	10	3	11	7	7	7	NA	NA	NA	7	8	NA	2	8	6	5	1	NA	7	7	NA	NA	NA	NA	NA	NA	NA	NA	NA	3
1148	145110514235476	9	1	34	3	3	4	1	81163	5	3	1	6	81	7	4	2	16	9	8	1	26	6	6	6	3	1	NA	2	2	2	2	9	6	6	3	1	5	5	NA	NA	NA	NA	3650	NA	1.8	2027.77777777778	3	1
1149	145110514283632	9	2	23	2	2	3	3	80021	7	4	1	11	80	4	2	2	19	10	9	1	7	3	3	3	3	1	NA	2	2	2	1	11	1	8	1	NA	1	1	900	NA	NA	NA	NA	NA	1	900	5	4
1150	145110514371665	9	2	27	3	3	3	3	67167	1	1	6	2	67	3	2	2	1	1	1	2	23	6	6	6	3	1	NA	5	7	5	2	8	6	5	2	0	5	5	NA	NA	NA	NA	3200	NA	1.5	2133.33333333333	3	1
1151	145110514387048	9	2	41	4	4	5	4	22029	1	1	6	1	22	6	3	2	6	5	5	1	21	5	5	5	3	1	NA	2	2	2	2	9	6	6	5	1	5	5	NA	NA	NA	NA	3400	NA	2.8	1214.28571428571	5	1
1152	145110514468900	9	2	59	5	5	6	4	20247	4	2	7	7	20	9	5	2	9	7	12	1	22	5	5	5	3	1	NA	2	2	2	2	2	2	1	2	0	3	3	NA	NA	1800	NA	NA	NA	1.5	1200	5	1
1153	145110514494519	9	2	37	4	4	4	4	68224	8	4	1	11	68	3	2	2	1	1	1	1	3	2	2	2	3	1	NA	2	2	2	2	8	6	5	2	0	4	4	NA	NA	NA	2987	NA	NA	1.5	1991.33333333333	3	1
1154	145110514571269	9	1	24	2	2	3	1	44100	1	1	6	3	44	6	3	2	18	12	11	1	2	2	2	2	1	3	NA	1	1	1	2	10	7	7	1	NA	2	2	NA	1200	NA	NA	NA	NA	1	1200	5	4
1155	145110514572311	9	1	21	2	2	3	1	31555	8	4	1	11	31	7	4	2	16	9	8	5	NA	9	8	8	NA	NA	NA	6	8	NA	1	11	1	8	1	NA	1	1	700	NA	NA	NA	NA	NA	1	700	6	3
1156	145110514594855	9	2	69	6	6	7	4	35238	8	4	1	11	35	6	3	2	6	5	5	3	20	8	7	7	NA	NA	NA	7	8	NA	2	8	6	5	2	0	4	4	NA	NA	NA	2800	NA	NA	1.5	1866.66666666667	3	1
1157	145110514601002	9	1	69	6	6	7	2	83118	6	3	3	9	83	9	5	2	21	13	12	3	10	7	7	7	NA	NA	NA	7	8	NA	2	11	8	8	2	0	6	6	NA	NA	NA	NA	NA	5500	1.5	3666.66666666667	1	1
1158	145110514603051	9	2	43	4	4	5	4	45278	2	2	4	2	45	5	3	2	7	6	6	1	23	6	6	6	3	1	NA	2	2	2	2	9	6	6	1	NA	7	7	NA	NA	NA	NA	NA	NA	NA	NA	NA	3
1159	145110514608176	9	2	40	4	4	5	4	6088	8	4	1	11	6	9	5	2	21	13	12	1	4	2	2	2	2	4	NA	2	1	1	1	8	1	5	2	0	5	5	NA	NA	NA	NA	3999	NA	1.5	2666	2	1
1160	145110514624572	9	2	65	6	6	7	4	84054	8	4	4	7	84	9	5	2	21	13	12	3	9	7	7	7	NA	NA	NA	7	8	NA	2	9	6	6	1	NA	2	2	NA	1450	NA	NA	NA	NA	1	1450	4	3
1161	145110514903134	9	2	68	6	6	7	4	33214	1	1	6	4	33	7	4	2	2	2	2	3	7	7	7	7	NA	NA	NA	7	8	NA	2	11	8	8	2	0	6	6	NA	NA	NA	NA	NA	6000	1.5	4000	1	1
1162	145110514907238	9	2	80	7	6	8	4	85288	3	2	5	5	85	6	3	2	18	12	11	3	8	7	7	7	NA	NA	NA	7	8	NA	2	9	6	6	2	0	6	6	NA	NA	NA	NA	NA	4200	1.5	2800	2	1
1163	145110514912360	9	2	68	6	6	7	4	57162	1	1	6	1	57	3	2	2	15	1	1	3	11	7	7	7	NA	NA	NA	7	8	NA	2	10	7	7	2	0	6	6	NA	NA	NA	NA	NA	4400	1.5	2933.33333333333	2	1
1164	145110514921581	9	1	61	5	5	7	2	17300	7	4	1	10	17	6	3	2	20	2	2	1	25	6	6	6	3	1	NA	2	2	2	2	8	6	5	3	0	3	3	NA	NA	1950	NA	NA	NA	2	975	5	1
1165	145110514945138	9	2	32	3	3	4	3	78501	9	5	3	3	78	1	1	1	12	8	7	1	23	6	6	6	3	1	NA	2	2	2	2	8	6	5	5	3	5	5	NA	NA	NA	NA	3400	NA	2.4	1416.66666666667	4	1
1166	145110514946163	9	2	40	4	4	5	4	63113	8	4	1	11	63	8	5	2	3	3	3	1	14	4	4	4	5	2	2	3	5	4	2	10	7	7	4	2	4	4	NA	NA	NA	2990	NA	NA	2.1	1423.80952380952	4	1
1167	145110514960509	9	2	93	7	6	8	4	40279	5	3	1	7	40	7	4	2	2	2	2	3	20	8	7	7	NA	NA	NA	7	8	NA	2	5	4	3	1	NA	3	3	NA	NA	1860	NA	NA	NA	1	1860	4	3
1168	145110515047441	9	1	28	3	3	3	1	13037	3	2	5	5	13	9	5	2	21	13	12	1	17	4	4	4	3	1	NA	2	2	2	2	11	8	8	2	0	6	6	NA	NA	NA	NA	NA	4100	1.5	2733.33333333333	2	2
1169	145110515060759	9	1	32	3	3	4	1	59350	8	4	1	11	59	2	2	2	17	10	9	1	16	4	4	4	3	1	NA	2	2	2	2	11	8	8	2	0	5	5	NA	NA	NA	NA	3999	NA	1.5	2666	2	1
1170	145110515063834	9	2	28	3	3	3	3	49367	1	1	6	5	49	6	3	2	18	12	11	1	16	4	4	4	3	1	NA	2	2	2	2	11	8	8	2	0	4	4	NA	NA	NA	2450	NA	NA	1.5	1633.33333333333	4	1
1171	145110515073059	9	1	45	4	4	5	2	93039	9	5	4	5	93	1	1	1	12	8	7	2	15	4	4	4	9	1	NA	5	7	5	2	4	3	2	1	NA	1	1	600	NA	NA	NA	NA	NA	1	600	6	3
1172	145110515168282	9	1	27	3	3	3	1	75119	9	5	1	11	75	1	1	1	12	8	7	1	9	3	3	3	3	1	NA	2	2	2	2	11	8	8	2	0	6	6	NA	NA	NA	NA	NA	4500	1.5	3000	2	1
1173	145110515275879	9	1	30	3	3	4	1	34172	8	4	1	11	34	9	5	2	13	9	8	1	26	6	6	6	3	1	NA	2	2	2	2	7	5	4	3	1	2	2	NA	1450	NA	NA	NA	NA	1.8	805.555555555556	6	1
1174	145110515294245	9	2	79	7	6	8	4	13056	8	4	3	9	13	9	5	2	21	13	12	3	11	7	7	7	NA	NA	NA	7	8	NA	2	11	8	8	2	0	5	5	NA	NA	NA	NA	3850	NA	1.5	2566.66666666667	2	1
1175	145110515300395	9	1	47	4	4	5	2	33019	4	2	3	5	33	7	4	2	2	2	2	1	18	5	5	5	6	2	2	3	5	4	2	5	4	3	2	1	4	4	NA	NA	NA	2500	NA	NA	1.3	1923.07692307692	3	2
1176	145110515304497	9	2	50	5	5	6	4	20042	4	2	7	5	20	9	5	2	9	7	12	1	20	5	5	5	3	1	NA	2	2	2	2	9	6	6	3	0	5	5	NA	NA	NA	NA	3300	NA	2	1650	4	1
1177	145110515322944	9	2	35	4	4	4	4	83137	8	4	1	11	83	9	5	2	21	13	12	1	3	2	2	2	1	3	NA	1	1	1	2	9	6	6	4	2	3	3	NA	NA	1700	NA	NA	NA	2.1	809.52380952381	6	1
1178	145110515348554	9	1	59	5	5	6	2	72181	8	4	1	11	72	6	3	2	18	12	11	1	24	6	6	6	3	1	NA	2	2	2	2	7	5	4	1	NA	1	1	800	NA	NA	NA	NA	NA	1	800	6	3
1179	145110515349585	9	1	34	3	3	4	1	62193	7	4	1	10	62	2	2	2	17	10	9	2	21	5	5	5	3	1	NA	5	7	5	2	11	8	8	4	2	1	1	800	NA	NA	NA	NA	NA	2.1	380.952380952381	6	1
1180	145110515413105	9	1	64	5	5	7	2	64122	8	4	1	8	64	7	4	2	2	2	2	3	9	7	7	7	NA	NA	NA	7	8	NA	2	11	8	8	1	NA	6	6	NA	NA	NA	NA	NA	4500	1	4500	1	2
1181	145110515715184	9	2	47	4	4	5	4	65366	1	1	6	1	65	7	4	2	16	9	8	2	20	5	5	5	3	1	NA	5	7	5	2	8	6	5	2	0	4	4	NA	NA	NA	2900	NA	NA	1.5	1933.33333333333	3	1
1182	145110515716100	9	2	31	3	3	4	3	25056	7	4	1	11	25	3	2	2	10	4	4	1	23	6	6	6	3	1	NA	2	2	2	2	10	7	7	4	2	4	4	NA	NA	NA	2560	NA	NA	2.1	1219.04761904762	5	1
1183	145110515730447	9	2	37	4	4	4	4	64547	8	4	3	5	64	7	4	2	2	2	2	1	20	5	5	5	3	1	NA	2	2	2	2	10	7	7	3	1	4	4	NA	NA	NA	2500	NA	NA	1.8	1388.88888888889	4	1
1184	145110515738644	9	2	76	7	6	8	4	59339	8	4	3	6	59	2	2	2	17	10	9	3	20	8	7	7	NA	NA	NA	7	8	NA	2	7	5	4	2	0	4	4	NA	NA	NA	2650	NA	NA	1.5	1766.66666666667	4	1
1185	145110515738646	9	2	68	6	6	7	4	77122	9	5	3	8	77	1	1	1	12	8	7	3	15	7	7	7	NA	NA	NA	7	8	NA	2	8	6	5	2	0	7	7	NA	NA	NA	NA	NA	NA	NA	NA	NA	1
1186	145110515803173	9	2	56	5	5	6	4	2259	1	1	6	1	2	4	2	2	19	10	9	1	3	2	2	2	1	3	NA	1	1	1	2	7	5	4	2	0	6	6	NA	NA	NA	NA	NA	5000	1.5	3333.33333333333	1	1
1187	145110515811375	9	2	36	4	4	4	4	92007	9	5	4	9	92	1	1	1	12	8	7	1	18	5	5	5	5	2	2	3	5	4	2	9	6	6	7	4	5	5	NA	NA	NA	NA	3900	NA	3.2	1218.75	5	1
1188	145110515817524	9	2	67	6	6	7	4	43012	8	4	3	5	43	8	5	2	3	3	3	3	12	7	7	7	NA	NA	NA	7	8	NA	2	10	7	7	2	0	5	5	NA	NA	NA	NA	3600	NA	1.5	2400	3	1
1189	145110515827771	9	1	48	4	4	5	2	76295	1	1	6	2	76	5	3	2	11	11	10	1	25	6	6	6	3	1	NA	2	2	2	2	8	6	5	4	2	4	4	NA	NA	NA	2400	NA	NA	2.1	1142.85714285714	5	1
1190	145110515829822	9	1	76	7	6	8	2	93078	9	5	4	9	93	1	1	1	12	8	7	3	17	7	7	7	NA	NA	NA	7	8	NA	2	6	5	4	2	0	5	5	NA	NA	NA	NA	3050	NA	1.5	2033.33333333333	3	1
1191	145110515903610	9	2	49	4	4	5	4	21617	8	4	3	7	21	4	2	2	5	4	4	1	12	4	4	4	3	1	NA	2	2	2	2	10	7	7	1	NA	3	3	NA	NA	1500	NA	NA	NA	1	1500	4	3
1192	145110516088926	9	1	46	4	4	5	2	42159	1	1	6	2	42	8	5	2	22	3	3	1	18	5	5	5	5	2	4	3	4	4	2	7	5	4	6	4	2	2	NA	1100	NA	NA	NA	NA	2.7	407.407407407407	6	3
1193	145110516115569	9	1	46	4	4	5	2	38561	1	1	6	2	38	8	5	2	22	3	3	1	7	3	3	3	4	2	NA	2	3	3	2	11	8	8	1	NA	3	3	NA	NA	1600	NA	NA	NA	1	1600	4	3
1194	145110516152439	9	2	77	7	6	8	4	69040	8	4	2	5	69	8	5	2	22	3	3	3	18	8	7	7	NA	NA	NA	7	8	NA	2	6	5	4	2	0	7	7	NA	NA	NA	NA	NA	NA	NA	NA	NA	1
1195	145110516175878	9	1	55	5	5	6	2	68224	8	4	1	11	68	3	2	2	1	1	1	1	26	6	6	6	3	1	NA	2	2	2	2	7	5	4	4	0	5	5	NA	NA	NA	NA	3200	NA	2.5	1280	5	1
1196	145110516175879	9	2	76	7	6	8	4	63470	2	2	5	4	63	8	5	2	3	3	3	3	24	8	7	7	NA	NA	NA	7	8	NA	2	6	5	4	1	NA	1	1	900	NA	NA	NA	NA	NA	1	900	5	2
1197	145110516229159	9	1	51	5	5	6	2	91345	9	5	3	8	91	1	1	1	12	8	7	1	9	3	3	3	3	1	NA	2	2	2	2	10	7	7	5	1	6	6	NA	NA	NA	NA	NA	5000	2.8	1785.71428571429	4	1
1198	145110516254770	9	1	30	3	3	4	1	47269	6	3	3	1	47	7	4	2	2	2	2	1	21	5	5	5	3	1	NA	2	2	2	2	8	6	5	3	1	4	4	NA	NA	NA	2400	NA	NA	1.8	1333.33333333333	4	1
1199	145110516267068	9	1	64	5	5	7	2	11170	2	2	5	5	11	9	5	2	13	9	8	2	16	4	4	4	9	1	NA	5	7	5	2	10	7	7	2	0	5	5	NA	NA	NA	NA	3900	NA	1.5	2600	2	1
1200	145110516276293	9	1	41	4	4	5	2	34198	8	4	3	6	34	9	5	2	13	9	8	1	23	6	6	6	3	1	NA	2	2	2	2	8	6	5	2	0	1	1	999	NA	NA	NA	NA	NA	1.5	666	6	1
1201	145110516497424	9	2	21	2	2	3	3	37261	8	4	1	11	37	5	3	2	7	6	6	5	NA	9	8	8	NA	NA	NA	6	8	NA	1	8	1	5	1	NA	1	1	527	NA	NA	NA	NA	NA	1	527	6	2
1202	145110516508720	9	1	51	5	5	6	2	84007	8	4	1	10	84	9	5	2	21	13	12	7	9	7	7	8	NA	NA	NA	8	8	NA	2	8	6	5	1	NA	1	1	846	NA	NA	NA	NA	NA	1	846	6	3
1203	145110516541515	9	2	41	4	4	5	4	57542	1	1	6	2	57	3	2	2	15	1	1	1	17	4	4	4	3	1	NA	2	2	2	2	10	7	7	4	1	7	7	NA	NA	NA	NA	NA	NA	NA	NA	NA	1
1204	145110516542540	9	1	78	7	6	8	2	21612	1	1	6	1	21	4	2	2	5	4	4	3	16	7	7	7	NA	NA	NA	7	8	NA	2	6	5	4	2	0	4	4	NA	NA	NA	2600	NA	NA	1.5	1733.33333333333	4	1
1205	145110516548693	9	1	44	4	4	5	2	13005	8	4	4	9	13	9	5	2	21	13	12	1	17	4	4	4	3	1	NA	2	2	2	2	9	6	6	4	2	6	6	NA	NA	NA	NA	NA	5200	2.1	2476.19047619048	2	1
1206	145110516625414	9	1	29	3	3	3	1	74135	1	1	6	1	74	8	5	2	22	3	3	1	23	6	6	6	3	1	NA	2	2	2	2	9	6	6	3	1	6	6	NA	NA	NA	NA	NA	4500	1.8	2500	2	1
1207	145110516628494	9	1	67	6	6	7	2	31557	8	4	2	8	31	7	4	2	16	9	8	3	9	7	7	7	NA	NA	NA	7	8	NA	2	11	8	8	2	0	5	5	NA	NA	NA	NA	3999	NA	1.5	2666	2	1
1208	145110516827154	9	1	26	3	3	3	1	20033	6	3	7	9	20	9	5	2	9	7	12	7	21	8	7	8	NA	NA	NA	8	8	NA	2	2	2	1	9	0	1	1	999	NA	NA	NA	NA	NA	5	199.8	6	4
1209	145110516828179	9	1	50	5	5	6	2	75117	9	5	1	11	75	1	1	1	12	8	7	2	25	6	6	6	3	1	NA	5	7	5	2	10	7	7	3	0	4	4	NA	NA	NA	2800	NA	NA	2	1400	4	3
1210	145110516838426	9	2	69	6	6	7	4	94017	9	5	4	10	94	1	1	1	12	8	7	3	22	8	7	7	NA	NA	NA	7	8	NA	2	10	7	7	2	0	6	6	NA	NA	NA	NA	NA	4200	1.5	2800	2	1
1211	145110516886569	9	1	67	6	6	7	2	85128	3	2	5	6	85	6	3	2	18	12	11	3	2	7	7	7	NA	NA	NA	7	8	NA	2	6	5	4	2	0	4	4	NA	NA	NA	2200	NA	NA	1.5	1466.66666666667	4	1
1212	145110516890668	9	2	51	5	5	6	4	49099	6	3	1	10	49	6	3	2	18	12	11	1	23	6	6	6	3	1	NA	2	2	2	2	10	7	7	3	0	5	5	NA	NA	NA	NA	3400	NA	2	1700	4	1
1213	145110516890669	9	2	77	7	6	8	4	40043	1	1	6	1	40	7	4	2	2	2	2	3	3	7	7	7	NA	NA	NA	7	8	NA	2	8	6	5	1	NA	1	1	950	NA	NA	NA	NA	NA	1	950	5	3
1214	145110516900916	9	2	26	3	3	3	3	91114	9	5	2	8	91	1	1	1	12	8	7	1	12	4	4	4	3	1	NA	2	2	2	2	11	8	8	4	2	5	5	NA	NA	NA	NA	3500	NA	2.1	1666.66666666667	4	1
1215	145110516908089	9	1	58	5	5	6	2	85243	3	2	3	3	85	6	3	2	18	12	11	1	26	6	6	6	3	1	NA	2	2	2	2	4	3	2	2	0	4	4	NA	NA	NA	2550	NA	NA	1.5	1700	4	1
1216	145110516908090	9	1	46	4	4	5	2	31555	8	4	1	11	31	7	4	2	16	9	8	1	21	5	5	5	3	1	NA	2	2	2	2	10	7	7	2	0	4	4	NA	NA	NA	2500	NA	NA	1.5	1666.66666666667	4	1
1217	145110516924494	9	2	62	5	5	7	4	89464	3	2	5	5	89	4	2	2	5	4	4	6	22	8	7	8	NA	NA	NA	8	8	NA	2	3	2	1	2	0	1	1	705	NA	NA	NA	NA	NA	1.5	470	6	1
1218	145110517174275	9	1	18	2	2	2	1	75120	9	5	1	11	75	1	1	1	12	8	7	5	NA	9	8	8	NA	NA	NA	6	8	NA	1	8	1	5	2	0	7	7	NA	NA	NA	NA	NA	NA	NA	NA	NA	1
1219	145110517186566	9	2	35	4	4	4	4	13207	8	4	1	11	13	9	5	2	21	13	12	2	9	3	3	3	3	1	NA	5	7	5	2	11	8	8	2	0	2	2	NA	1499	NA	NA	NA	NA	1.5	999.333333333333	5	1
1220	145110517186571	9	1	43	4	4	5	2	92004	9	5	3	10	92	1	1	1	12	8	7	1	9	3	3	3	3	1	NA	2	2	2	2	10	7	7	2	0	4	4	NA	NA	NA	2250	NA	NA	1.5	1500	4	2
1221	145110517187598	9	2	60	5	5	7	4	13075	8	4	3	7	13	9	5	2	21	13	12	1	18	5	5	5	4	2	NA	2	3	3	2	10	7	7	2	0	7	7	NA	NA	NA	NA	NA	NA	NA	NA	NA	1
1222	145110517203984	9	2	77	7	6	8	4	38185	8	4	1	11	38	8	5	2	22	3	3	3	9	7	7	7	NA	NA	NA	7	8	NA	2	8	6	5	2	0	5	5	NA	NA	NA	NA	3300	NA	1.5	2200	3	1
1223	145110517216285	9	1	75	7	6	8	2	51391	2	2	5	3	51	4	2	2	8	1	1	3	7	7	7	7	NA	NA	NA	7	8	NA	2	11	8	8	2	0	5	5	NA	NA	NA	NA	3416	NA	1.5	2277.33333333333	3	1
1224	145110517264433	9	2	40	4	4	5	4	17196	1	1	6	1	17	6	3	2	20	2	2	1	18	5	5	5	5	2	2	3	5	4	2	11	8	8	6	4	4	4	NA	NA	NA	2700	NA	NA	2.7	1000	5	1
1225	145110517305413	9	2	26	3	3	3	3	42218	8	4	1	11	42	8	5	2	22	3	3	1	20	5	5	5	3	1	NA	2	2	2	2	11	8	8	4	2	7	7	NA	NA	NA	NA	NA	NA	NA	NA	NA	1
1226	145110517317722	9	1	66	6	6	7	2	33069	8	4	2	8	33	7	4	2	2	2	2	3	4	7	7	7	NA	NA	NA	7	8	NA	2	11	8	8	1	NA	6	6	NA	NA	NA	NA	NA	5730	1	5730	1	2
1227	145110517368854	9	2	26	3	3	3	3	69381	8	4	1	11	69	8	5	2	22	3	3	1	8	3	3	3	3	1	NA	2	2	2	2	11	8	8	2	0	7	7	NA	NA	NA	NA	NA	NA	NA	NA	NA	1
1228	145110517420159	9	2	34	3	3	4	3	95572	9	5	4	8	95	1	1	1	12	8	7	1	18	5	5	5	4	2	NA	2	3	3	2	9	6	6	4	2	4	4	NA	NA	NA	2285	NA	NA	2.1	1088.09523809524	5	1
1229	145110517496883	9	1	49	4	4	5	2	80253	3	2	1	5	80	4	2	2	19	10	9	2	22	5	5	5	9	1	NA	5	7	5	2	8	6	5	2	0	5	5	NA	NA	NA	NA	3125	NA	1.5	2083.33333333333	3	4
1230	145110517506142	9	2	34	3	3	4	3	95306	9	5	2	8	95	1	1	1	12	8	7	7	23	8	7	8	NA	NA	NA	8	8	NA	1	7	1	4	1	NA	2	2	NA	1300	NA	NA	NA	NA	1	1300	5	1
1231	145110517578872	9	2	75	7	6	8	4	83049	8	4	3	7	83	9	5	2	21	13	12	3	3	7	7	7	NA	NA	NA	7	8	NA	2	7	5	4	2	0	4	4	NA	NA	NA	2500	NA	NA	1.5	1666.66666666667	4	1
1232	145110517583994	9	1	54	5	5	6	2	57663	8	4	4	5	57	3	2	2	15	1	1	1	23	6	6	6	3	1	NA	2	2	2	2	6	5	4	4	2	4	4	NA	NA	NA	2150	NA	NA	2.1	1023.80952380952	5	1
1233	145110517644316	9	1	56	5	5	6	2	56121	7	4	1	10	56	6	3	2	6	5	5	1	11	4	4	4	5	2	3	3	4	4	2	8	6	5	1	NA	2	2	NA	1300	NA	NA	NA	NA	1	1300	5	3
1234	145110517696587	9	2	37	4	4	4	4	31523	2	2	1	2	31	7	4	2	16	9	8	1	24	6	6	6	1	3	NA	1	1	1	2	8	6	5	3	1	3	3	NA	NA	1550	NA	NA	NA	1.8	861.111111111111	6	1
1235	145110517757994	9	1	31	3	3	4	1	83126	8	4	4	10	83	9	5	2	21	13	12	1	16	4	4	4	3	1	NA	2	2	2	2	11	8	8	3	1	6	6	NA	NA	NA	NA	NA	4200	1.8	2333.33333333333	3	1
1236	145110517805141	9	1	19	2	2	2	1	21231	8	4	1	11	21	4	2	2	5	4	4	2	1	1	1	1	3	1	NA	5	7	5	2	9	6	6	1	NA	1	1	212	NA	NA	NA	NA	NA	1	212	6	4
1237	145110517841964	9	2	19	2	2	2	3	22206	2	2	1	4	22	6	3	2	6	5	5	2	21	5	5	5	4	2	NA	5	7	5	2	6	5	4	1	NA	1	1	600	NA	NA	NA	NA	NA	1	600	6	2
1238	145110517846063	9	1	57	5	5	6	2	69189	6	3	3	2	69	8	5	2	22	3	3	1	18	5	5	5	5	2	2	3	5	4	2	6	5	4	3	0	6	6	NA	NA	NA	NA	NA	4200	2	2100	3	1
1239	145110517847089	9	2	41	4	4	5	4	33037	3	2	1	3	33	7	4	2	2	2	2	1	9	3	3	3	3	1	NA	2	2	2	2	11	8	8	2	0	5	5	NA	NA	NA	NA	3900	NA	1.5	2600	2	1
1240	145110517855284	9	1	48	4	4	5	2	35179	1	1	6	4	35	6	3	2	6	5	5	1	17	4	4	4	3	1	NA	2	2	2	2	9	6	6	2	0	5	5	NA	NA	NA	NA	3500	NA	1.5	2333.33333333333	3	1
1241	145110517861430	9	1	56	5	5	6	2	38185	8	4	1	11	38	8	5	2	22	3	3	1	15	4	4	4	3	1	NA	2	2	2	1	10	1	7	3	0	5	5	NA	NA	NA	NA	3400	NA	2	1700	4	1
1242	145110517864510	9	1	34	3	3	4	1	59488	5	3	4	3	59	2	2	2	17	10	9	1	11	4	4	4	5	2	2	3	5	4	2	11	8	8	2	0	7	7	NA	NA	NA	NA	NA	NA	NA	NA	NA	4
1243	145110517864512	9	1	63	5	5	7	2	13114	3	2	5	5	13	9	5	2	21	13	12	1	14	4	4	4	5	2	2	3	5	4	2	10	7	7	2	0	6	6	NA	NA	NA	NA	NA	4965	1.5	3310	1	1
1244	145110518052870	9	1	63	5	5	7	2	71291	1	1	6	1	71	4	2	2	5	4	4	1	15	4	4	4	3	1	NA	2	2	2	2	9	6	6	2	0	4	4	NA	NA	NA	2500	NA	NA	1.5	1666.66666666667	4	1
1245	145110518186014	9	1	53	5	5	6	2	21027	1	1	6	2	21	4	2	2	5	4	4	1	10	3	3	3	3	1	NA	2	2	2	2	10	7	7	4	0	5	5	NA	NA	NA	NA	3700	NA	2.5	1480	4	1
1246	145110518188065	9	1	49	4	4	5	2	92019	9	5	2	9	92	1	1	1	12	8	7	1	17	4	4	4	4	2	NA	2	3	3	2	10	7	7	4	2	5	5	NA	NA	NA	NA	3800	NA	2.1	1809.52380952381	4	1
1247	145110518188066	9	1	73	6	6	8	2	14478	2	2	1	3	14	5	3	2	4	11	10	3	3	7	7	7	NA	NA	NA	7	8	NA	2	10	7	7	2	0	5	5	NA	NA	NA	NA	3200	NA	1.5	2133.33333333333	3	1
1248	145110518203433	9	2	74	6	6	8	4	36044	6	3	1	9	36	5	3	2	7	6	6	3	12	7	7	7	NA	NA	NA	7	8	NA	2	10	7	7	2	0	7	7	NA	NA	NA	NA	NA	NA	NA	NA	NA	1
1249	145110518212654	9	1	72	6	6	8	2	49214	3	2	5	5	49	6	3	2	18	12	11	3	10	7	7	7	NA	NA	NA	7	8	NA	2	5	4	3	2	0	6	6	NA	NA	NA	NA	NA	4800	1.5	3200	1	1
1250	145110518230071	9	2	42	4	4	5	4	51454	8	4	1	11	51	4	2	2	8	1	1	1	3	2	2	2	1	3	NA	1	1	1	2	9	6	6	3	1	1	1	750	NA	NA	NA	NA	NA	1.8	416.666666666667	6	1
1251	145110518253642	9	1	43	4	4	5	2	59178	8	4	1	9	59	2	2	2	17	10	9	1	12	4	4	4	3	1	NA	2	2	2	2	7	5	4	2	0	4	4	NA	NA	NA	2900	NA	NA	1.5	1933.33333333333	3	3
1252	145110518262871	9	2	68	6	6	7	4	85191	6	3	5	10	85	6	3	2	18	12	11	3	12	7	7	7	NA	NA	NA	7	8	NA	2	10	7	7	1	NA	4	4	NA	NA	NA	2250	NA	NA	1	2250	3	3
1253	145110518265944	9	1	75	7	6	8	2	92026	9	5	2	10	92	1	1	1	12	8	7	3	9	7	7	7	NA	NA	NA	7	8	NA	2	8	6	5	2	0	7	7	NA	NA	NA	NA	NA	NA	NA	NA	NA	1
1254	145110518332429	9	2	44	4	4	5	4	77285	9	5	4	8	77	1	1	1	12	8	7	1	24	6	6	6	3	1	NA	2	2	2	2	7	5	4	3	0	4	4	NA	NA	NA	2999	NA	NA	2	1499.5	4	1
1255	145110518563966	9	1	20	2	2	3	1	78531	5	3	1	5	78	1	1	1	12	8	7	5	NA	9	8	8	NA	NA	NA	6	8	NA	1	11	1	8	3	0	5	5	NA	NA	NA	NA	3189	NA	2	1594.5	4	3
1256	145110518568967	9	1	72	6	6	8	2	68154	8	4	4	7	68	3	2	2	1	1	1	3	20	8	7	7	NA	NA	NA	7	8	NA	2	9	6	6	1	NA	3	3	NA	NA	1975	NA	NA	NA	1	1975	3	3
1257	145110518573066	9	2	68	6	6	7	4	29239	4	2	3	3	29	6	3	2	6	5	5	3	15	7	7	7	NA	NA	NA	7	8	NA	2	8	6	5	2	0	4	4	NA	NA	NA	2900	NA	NA	1.5	1933.33333333333	3	1
1258	145110518578188	9	1	67	6	6	7	2	29032	5	3	3	3	29	6	3	2	6	5	5	3	16	7	7	7	NA	NA	NA	7	8	NA	2	6	5	4	2	0	5	5	NA	NA	NA	NA	3950	NA	1.5	2633.33333333333	2	1
1259	145110518587408	9	1	37	4	4	4	2	92004	9	5	3	10	92	1	1	1	12	8	7	1	8	3	3	3	3	1	NA	2	2	2	2	11	8	8	4	2	5	5	NA	NA	NA	NA	3000	NA	2.1	1428.57142857143	4	1
1260	145110518593554	9	1	34	3	3	4	1	59350	8	4	1	11	59	2	2	2	17	10	9	1	12	4	4	4	1	3	NA	1	1	1	2	10	7	7	3	1	6	6	NA	NA	NA	NA	NA	4500	1.8	2500	2	1
1261	145110518593555	9	1	49	4	4	5	2	21656	1	1	6	1	21	4	2	2	5	4	4	1	27	6	6	6	3	1	NA	2	2	2	2	7	5	4	4	0	5	5	NA	NA	NA	NA	3500	NA	2.5	1400	4	1
1262	145110518599703	9	2	59	5	5	6	4	54395	8	4	1	11	54	3	2	2	15	1	1	1	6	3	3	3	5	2	2	3	5	4	2	11	8	8	1	NA	4	4	NA	NA	NA	2700	NA	NA	1	2700	2	3
1263	145110518657058	9	2	68	6	6	7	4	95018	9	5	4	11	95	1	1	1	12	8	7	3	20	8	7	7	NA	NA	NA	7	8	NA	2	7	5	4	1	NA	2	2	NA	1490	NA	NA	NA	NA	1	1490	4	3
1264	145110518662182	9	2	34	3	3	4	3	77014	5	3	1	7	77	1	1	1	12	8	7	1	9	3	3	3	3	1	NA	2	2	2	2	11	8	8	3	1	5	5	NA	NA	NA	NA	3500	NA	1.8	1944.44444444444	3	1
1265	145110518704172	9	2	56	5	5	6	4	41018	6	3	1	9	41	5	3	2	7	6	6	1	25	6	6	6	3	1	NA	2	2	2	2	6	5	4	1	NA	1	1	600	NA	NA	NA	NA	NA	1	600	6	3
1266	145110519016467	9	2	57	5	5	6	4	28302	1	1	6	2	28	5	3	2	7	6	6	1	23	6	6	6	5	2	3	3	4	4	2	5	4	3	2	0	4	4	NA	NA	NA	2500	NA	NA	1.5	1666.66666666667	4	1
1267	145110519026757	9	2	24	2	2	3	3	44043	4	2	1	5	44	6	3	2	18	12	11	1	20	5	5	5	3	1	NA	2	2	2	2	10	7	7	4	0	4	4	NA	NA	NA	2850	NA	NA	2.5	1140	5	2
1268	145110519033936	9	2	43	4	4	5	4	59286	8	4	4	7	59	2	2	2	17	10	9	1	11	4	4	4	5	2	2	3	5	4	2	11	8	8	1	NA	4	4	NA	NA	NA	2200	NA	NA	1	2200	3	4
1269	145110519044180	9	2	67	6	6	7	4	6088	8	4	1	11	6	9	5	2	21	13	12	3	18	8	7	7	NA	NA	NA	7	8	NA	2	11	8	8	1	NA	2	2	NA	1300	NA	NA	NA	NA	1	1300	5	3
1270	145110519061599	9	2	73	6	6	8	4	73278	1	1	6	2	73	8	5	2	22	3	3	3	20	8	7	7	NA	NA	NA	7	8	NA	2	7	5	4	6	0	2	2	NA	1165	NA	NA	NA	NA	3.5	332.857142857143	6	3
1271	145110519070822	9	2	55	5	5	6	4	57480	8	4	3	8	57	3	2	2	15	1	1	1	11	4	4	4	5	2	2	3	5	4	2	11	8	8	4	0	6	6	NA	NA	NA	NA	NA	4500	2.5	1800	4	1
1272	145110519070823	9	2	79	7	6	8	4	77053	4	2	5	7	77	1	1	1	12	8	7	3	6	7	7	7	NA	NA	NA	7	8	NA	2	5	4	3	2	0	5	5	NA	NA	NA	NA	3150	NA	1.5	2100	3	1
1273	145110519084144	9	2	30	3	3	4	3	87085	7	4	1	11	87	7	4	2	14	2	2	1	20	5	5	5	3	1	NA	2	2	2	2	9	6	6	3	1	4	4	NA	NA	NA	2700	NA	NA	1.8	1500	4	1
1274	145110519115777	9	2	25	3	3	3	3	2321	2	2	3	1	2	4	2	2	19	10	9	1	5	3	3	3	1	3	NA	1	1	1	2	11	8	8	2	0	4	4	NA	NA	NA	2500	NA	NA	1.5	1666.66666666667	4	1
1275	145110519286808	9	1	40	4	4	5	2	57463	8	4	1	11	57	3	2	2	15	1	1	2	28	6	6	6	3	1	NA	5	7	5	2	2	2	1	4	2	2	2	NA	1000	NA	NA	NA	NA	2.1	476.190476190476	6	1
1276	145110519392267	9	1	49	4	4	5	2	83064	3	2	5	5	83	9	5	2	21	13	12	1	25	6	6	6	3	1	NA	2	2	2	2	7	5	4	4	0	6	6	NA	NA	NA	NA	NA	4500	2.5	1800	4	1
1277	145110519392268	9	1	30	3	3	4	1	1435	2	2	5	3	1	8	5	2	22	3	3	1	20	5	5	5	3	1	NA	2	2	2	2	10	7	7	2	0	6	6	NA	NA	NA	NA	NA	5200	1.5	3466.66666666667	1	1
1278	145110519398424	9	2	50	5	5	6	4	4113	1	1	6	1	4	9	5	2	21	13	12	1	22	5	5	5	3	1	NA	2	2	2	2	6	5	4	4	0	2	2	NA	1200	NA	NA	NA	NA	2.5	480	6	1
1279	145110519398426	9	1	18	2	2	2	1	1102	1	1	6	1	1	8	5	2	22	3	3	5	NA	9	8	8	NA	NA	NA	6	8	NA	1	7	1	4	4	1	3	3	NA	NA	1500	NA	NA	NA	2.3	652.173913043478	6	3
1280	145110519423026	9	2	68	6	6	7	4	77042	2	2	5	3	77	1	1	1	12	8	7	3	4	7	7	7	NA	NA	NA	7	8	NA	2	9	6	6	1	NA	2	2	NA	1499	NA	NA	NA	NA	1	1499	4	3
1281	145110519439415	9	2	57	5	5	6	4	44180	3	2	5	5	44	6	3	2	18	12	11	1	23	6	6	6	3	1	NA	2	2	2	2	6	5	4	2	0	4	4	NA	NA	NA	2999	NA	NA	1.5	1999.33333333333	3	1
1282	145110519459904	9	1	77	7	6	8	2	4152	5	3	2	4	4	9	5	2	21	13	12	3	5	7	7	7	NA	NA	NA	7	8	NA	2	7	5	4	2	0	4	4	NA	NA	NA	2600	NA	NA	1.5	1733.33333333333	4	1
1283	145110519473220	9	2	22	2	2	3	3	69257	3	2	1	2	69	8	5	2	22	3	3	1	21	5	5	5	3	1	NA	2	2	2	2	10	7	7	2	0	4	4	NA	NA	NA	2100	NA	NA	1.5	1400	4	1
1284	145110519518300	9	2	75	7	6	8	4	86041	7	4	3	7	86	6	3	2	20	2	2	3	14	7	7	7	NA	NA	NA	7	8	NA	2	6	5	4	2	0	4	4	NA	NA	NA	2900	NA	NA	1.5	1933.33333333333	3	1
1285	145110519526495	9	1	30	3	3	4	1	1389	1	1	6	2	1	8	5	2	22	3	3	1	11	4	4	4	6	2	2	3	5	4	2	5	4	3	5	3	6	6	NA	NA	NA	NA	NA	6500	2.4	2708.33333333333	2	3
1286	145110519768085	9	1	53	5	5	6	2	95018	9	5	4	11	95	1	1	1	12	8	7	1	23	6	6	6	3	1	NA	2	2	2	2	7	5	4	4	0	4	4	NA	NA	NA	2999	NA	NA	2.5	1199.6	5	1
1287	145110519769110	9	1	47	4	4	5	2	92012	9	5	2	11	92	1	1	1	12	8	7	1	18	5	5	5	5	2	2	3	5	4	2	11	8	8	5	3	7	7	NA	NA	NA	NA	NA	NA	NA	NA	NA	1
1288	145110519817256	9	2	69	6	6	7	4	22113	5	3	1	7	22	6	3	2	6	5	5	3	10	7	7	7	NA	NA	NA	7	8	NA	2	11	8	8	1	NA	4	4	NA	NA	NA	2600	NA	NA	1	2600	2	4
1289	145110519823404	9	2	31	3	3	4	3	86128	2	2	5	3	86	6	3	2	20	2	2	1	21	5	5	5	3	1	NA	2	2	2	2	9	6	6	5	3	4	4	NA	NA	NA	2300	NA	NA	2.4	958.333333333333	5	1
1290	145110519826477	9	1	29	3	3	3	1	40051	1	1	6	1	40	7	4	2	2	2	2	1	16	4	4	4	3	1	NA	2	2	2	2	9	6	6	3	1	5	5	NA	NA	NA	NA	3400	NA	1.8	1888.88888888889	3	1
1291	145110519836725	9	1	30	3	3	4	1	60500	3	2	1	3	60	4	2	2	19	10	9	1	23	6	6	6	4	2	NA	2	3	3	2	8	6	5	3	1	4	4	NA	NA	NA	2800	NA	NA	1.8	1555.55555555556	4	1
1292	145110520036451	9	2	30	3	3	4	3	90010	6	3	1	9	90	3	2	2	10	4	4	1	22	5	5	5	3	1	NA	2	2	2	2	8	6	5	3	1	1	1	920	NA	NA	NA	NA	NA	1.8	511.111111111111	6	2
1293	145110520122481	9	2	36	4	4	4	4	2001	1	1	6	1	2	4	2	2	19	10	9	1	12	4	4	4	4	2	NA	2	3	3	2	10	7	7	4	2	5	5	NA	NA	NA	NA	3900	NA	2.1	1857.14285714286	4	1
1294	145110520124530	9	1	78	7	6	8	2	62392	1	1	6	1	62	2	2	2	17	10	9	3	7	7	7	7	NA	NA	NA	7	8	NA	2	11	8	8	1	NA	5	5	NA	NA	NA	NA	3100	NA	1	3100	2	3
1295	145110520152080	9	2	24	2	2	3	3	34301	6	3	1	9	34	9	5	2	13	9	8	1	7	3	3	3	4	2	NA	2	3	3	1	11	1	8	2	0	4	4	NA	NA	NA	2900	NA	NA	1.5	1933.33333333333	3	3
1296	145110520164377	9	1	58	5	5	6	2	76540	8	4	1	11	76	5	3	2	11	11	10	1	22	5	5	5	9	1	NA	2	2	2	2	6	5	4	2	0	6	6	NA	NA	NA	NA	NA	4500	1.5	3000	2	1
1297	145110520169514	9	2	20	2	2	3	3	63113	8	4	1	11	63	8	5	2	3	3	3	2	21	5	5	5	5	2	4	5	7	5	2	9	6	6	1	NA	2	2	NA	1000	NA	NA	NA	NA	1	1000	5	4
1298	145110520304693	9	2	27	3	3	3	3	67543	4	2	1	3	67	3	2	2	1	1	1	1	12	4	4	4	3	1	NA	2	2	2	2	10	7	7	2	0	4	4	NA	NA	NA	2700	NA	NA	1.5	1800	4	1
1299	145110520341513	9	2	32	3	3	4	3	93051	9	5	3	10	93	1	1	1	12	8	7	5	NA	9	8	8	NA	NA	NA	6	8	NA	1	7	1	4	2	0	2	2	NA	1400	NA	NA	NA	NA	1.5	933.333333333333	5	3
1300	145110520347660	9	2	34	3	3	4	3	27193	4	2	3	2	27	5	3	2	11	11	10	1	5	3	3	3	1	3	NA	1	1	1	2	10	7	7	5	2	5	5	NA	NA	NA	NA	3600	NA	2.6	1384.61538461538	4	1
1301	145110520351759	9	2	23	2	2	3	3	59028	8	4	4	5	59	2	2	2	17	10	9	5	NA	9	8	8	NA	NA	NA	6	8	NA	1	10	1	7	2	1	1	1	550	NA	NA	NA	NA	NA	1.3	423.076923076923	6	3
1302	145110520353840	9	2	37	4	4	4	4	20042	4	2	7	5	20	9	5	2	9	7	12	1	18	5	5	5	5	2	2	3	5	4	2	11	8	8	3	1	4	4	NA	NA	NA	2900	NA	NA	1.8	1611.11111111111	4	1
1303	145110520353848	9	2	37	4	4	4	4	65047	6	3	4	5	65	7	4	2	16	9	8	6	22	8	7	8	NA	NA	NA	8	8	NA	2	7	5	4	5	2	2	2	NA	1449	NA	NA	NA	NA	2.6	557.307692307692	6	1
1304	145110520375366	9	1	52	5	5	6	2	29181	1	1	6	3	29	6	3	2	6	5	5	1	17	4	4	4	3	1	NA	2	2	2	2	6	5	4	3	0	7	7	NA	NA	NA	NA	NA	NA	NA	NA	NA	1
1305	145110520479830	9	1	70	6	6	8	2	92044	9	5	2	10	92	1	1	1	12	8	7	3	10	7	7	7	NA	NA	NA	7	8	NA	2	10	7	7	2	0	5	5	NA	NA	NA	NA	3250	NA	1.5	2166.66666666667	3	1
1306	145110520488027	9	2	29	3	3	3	3	67482	8	4	1	11	67	3	2	2	1	1	1	1	7	3	3	3	3	1	NA	2	2	2	2	11	8	8	1	NA	7	7	NA	NA	NA	NA	NA	NA	NA	NA	NA	3
1307	145110520508510	9	1	29	3	3	3	1	14118	7	4	1	11	14	5	3	2	4	11	10	1	20	5	5	5	3	1	NA	2	2	2	2	10	7	7	1	NA	2	2	NA	1412	NA	NA	NA	NA	1	1412	4	2
1308	145110520508513	9	2	65	6	6	7	4	60233	2	2	1	2	60	4	2	2	19	10	9	3	20	8	7	7	NA	NA	NA	7	8	NA	2	9	6	6	2	0	4	4	NA	NA	NA	2900	NA	NA	1.5	1933.33333333333	3	1
1309	145110520551537	9	2	45	4	4	5	4	49160	2	2	5	3	49	6	3	2	18	12	11	1	20	5	5	5	3	1	NA	2	2	2	2	10	7	7	6	1	5	5	NA	NA	NA	NA	3500	NA	3.3	1060.60606060606	5	1
1310	145110520559734	9	2	38	4	4	4	4	34172	8	4	1	11	34	9	5	2	13	9	8	2	18	5	5	5	7	2	2	5	7	5	2	9	6	6	1	NA	2	2	NA	1200	NA	NA	NA	NA	1	1200	5	4
1311	145110520801318	9	1	58	5	5	6	2	93066	9	5	4	11	93	1	1	1	12	8	7	1	9	3	3	3	3	1	NA	2	2	2	2	11	8	8	1	NA	5	5	NA	NA	NA	NA	3990	NA	1	3990	1	3
1312	145110520830008	9	1	79	7	6	8	2	27049	1	1	6	4	27	5	3	2	11	11	10	3	10	7	7	7	NA	NA	NA	7	8	NA	2	10	7	7	1	NA	4	4	NA	NA	NA	2001	NA	NA	1	2001	3	3
1313	145110520894534	9	1	72	6	6	8	2	75114	9	5	1	11	75	1	1	1	12	8	7	3	25	8	7	7	NA	NA	NA	7	8	NA	2	6	5	4	2	0	4	4	NA	NA	NA	2600	NA	NA	1.5	1733.33333333333	4	1
1314	145110520897608	9	1	66	6	6	7	2	59279	8	4	4	8	59	2	2	2	17	10	9	3	3	7	7	7	NA	NA	NA	7	8	NA	2	5	4	3	2	0	6	6	NA	NA	NA	NA	NA	4300	1.5	2866.66666666667	2	1
1315	145110521014399	9	2	47	4	4	5	4	50129	6	3	1	10	50	5	3	2	4	11	10	2	27	6	6	6	3	1	NA	5	7	5	2	5	4	3	4	0	4	4	NA	NA	NA	2650	NA	NA	2.5	1060	5	4
1316	145110521199705	9	1	32	3	3	4	1	44190	8	4	3	8	44	6	3	2	18	12	11	1	17	4	4	4	3	1	NA	2	2	2	2	9	6	6	3	1	5	5	NA	NA	NA	NA	3500	NA	1.8	1944.44444444444	3	1
1317	145110521199714	9	2	25	3	3	3	3	37261	8	4	1	11	37	5	3	2	7	6	6	2	12	4	4	4	3	1	NA	5	7	5	2	9	6	6	1	NA	2	2	NA	1400	NA	NA	NA	NA	1	1400	4	3
1318	145110521204844	9	1	78	7	6	8	2	92020	9	5	2	9	92	1	1	1	12	8	7	3	8	7	7	7	NA	NA	NA	7	8	NA	2	11	8	8	2	0	6	6	NA	NA	NA	NA	NA	6000	1.5	4000	1	1
1319	145110521213049	9	1	33	3	3	4	1	78242	9	5	2	7	78	1	1	1	12	8	7	1	23	6	6	6	3	1	NA	2	2	2	2	6	5	4	3	1	3	3	NA	NA	1650	NA	NA	NA	1.8	916.666666666667	5	1
1320	145110521217147	9	2	71	6	6	8	4	76270	8	4	2	3	76	5	3	2	11	11	10	3	24	8	7	7	NA	NA	NA	7	8	NA	2	6	5	4	2	0	4	4	NA	NA	NA	2400	NA	NA	1.5	1600	4	1
1321	145110521246726	9	2	55	5	5	6	4	62041	6	3	1	9	62	2	2	2	17	10	9	1	20	5	5	5	3	1	NA	2	2	2	2	5	4	3	2	0	3	3	NA	NA	1980	NA	NA	NA	1.5	1320	4	1
1322	145110521252876	9	1	49	4	4	5	2	43020	4	2	3	4	43	8	5	2	3	3	3	1	23	6	6	6	3	1	NA	2	2	2	2	6	5	4	3	0	4	4	NA	NA	NA	2300	NA	NA	2	1150	5	1
1323	145110521510918	9	1	34	3	3	4	1	81218	6	3	2	3	81	7	4	2	16	9	8	1	16	4	4	4	3	1	NA	2	2	2	2	8	6	5	2	0	4	4	NA	NA	NA	2100	NA	NA	1.5	1400	4	1
1324	145110521510920	9	2	30	3	3	4	3	75111	9	5	1	11	75	1	1	1	12	8	7	1	15	4	4	4	3	1	NA	2	2	2	2	11	8	8	1	NA	4	4	NA	NA	NA	2800	NA	NA	1	2800	2	3
1325	145110521517121	9	2	25	3	3	3	3	92012	9	5	2	11	92	1	1	1	12	8	7	1	21	5	5	5	3	1	NA	2	2	2	2	10	7	7	2	0	5	5	NA	NA	NA	NA	3500	NA	1.5	2333.33333333333	3	1
1326	145110521525327	9	1	69	6	6	7	2	25056	7	4	1	11	25	3	2	2	10	4	4	3	10	7	7	7	NA	NA	NA	7	8	NA	2	11	8	8	1	NA	2	2	NA	1499	NA	NA	NA	NA	1	1499	4	4
1327	145110521536597	9	2	73	6	6	8	4	92025	9	5	3	10	92	1	1	1	12	8	7	3	20	8	7	7	NA	NA	NA	7	8	NA	2	4	3	2	2	0	4	4	NA	NA	NA	2300	NA	NA	1.5	1533.33333333333	4	1
1328	145110521544802	9	2	35	4	4	4	4	38455	2	2	5	4	38	8	5	2	22	3	3	1	23	6	6	6	3	1	NA	2	2	2	2	9	6	6	2	0	4	4	NA	NA	NA	2800	NA	NA	1.5	1866.66666666667	3	1
1329	145110521680982	9	2	34	3	3	4	3	90010	6	3	1	9	90	3	2	2	10	4	4	1	9	3	3	3	3	1	NA	2	2	2	1	11	1	8	3	1	6	6	NA	NA	NA	NA	NA	10000	1.8	5555.55555555556	1	1
1330	145110521801738	9	2	75	7	6	8	4	69387	8	4	1	11	69	8	5	2	22	3	3	3	7	7	7	7	NA	NA	NA	7	8	NA	2	11	8	8	2	0	5	5	NA	NA	NA	NA	3550	NA	1.5	2366.66666666667	3	1
1331	145110521807888	9	1	50	5	5	6	2	20033	6	3	7	9	20	9	5	2	9	7	12	1	18	5	5	5	4	2	NA	2	3	3	2	6	5	4	3	0	4	4	NA	NA	NA	2400	NA	NA	2	1200	5	2
1332	145110521820189	9	2	71	6	6	8	4	59385	7	4	4	3	59	2	2	2	17	10	9	3	20	8	7	7	NA	NA	NA	7	8	NA	2	7	5	4	2	0	7	7	NA	NA	NA	NA	NA	NA	NA	NA	NA	1
1333	145110521820190	9	1	77	7	6	8	2	6155	8	4	4	8	6	9	5	2	21	13	12	3	7	7	7	7	NA	NA	NA	7	8	NA	2	11	8	8	1	NA	6	6	NA	NA	NA	NA	NA	4250	1	4250	1	3
1334	145110521835556	9	2	66	6	6	7	4	31555	8	4	1	11	31	7	4	2	16	9	8	3	9	7	7	7	NA	NA	NA	7	8	NA	2	10	7	7	1	NA	4	4	NA	NA	NA	2500	NA	NA	1	2500	2	2
1335	145110521873460	9	1	29	3	3	3	1	13215	8	4	1	11	13	9	5	2	21	13	12	1	16	4	4	4	3	1	NA	2	2	2	2	9	6	6	4	2	4	4	NA	NA	NA	2100	NA	NA	2.1	1000	5	1
1336	145110522127454	9	2	19	2	2	2	3	38185	8	4	1	11	38	8	5	2	22	3	3	5	NA	9	8	8	NA	NA	NA	6	8	NA	1	8	1	5	1	NA	2	2	NA	1420	NA	NA	NA	NA	1	1420	4	4
1337	145116394828915	9	1	46	4	4	5	2	44020	8	4	3	7	44	6	3	2	18	12	11	1	14	4	4	4	5	2	2	3	5	4	2	10	7	7	4	1	5	5	NA	NA	NA	NA	3500	NA	2.3	1521.73913043478	4	1
1338	145116394849405	9	1	37	4	4	4	2	31555	8	4	1	11	31	7	4	2	16	9	8	1	15	4	4	4	3	1	NA	2	2	2	2	10	7	7	2	0	6	6	NA	NA	NA	NA	NA	4500	1.5	3000	2	1
1339	145116394865671	9	1	52	5	5	6	2	20130	1	1	7	3	20	9	5	2	9	7	12	1	24	6	6	6	5	2	2	3	5	4	2	6	5	4	1	NA	3	3	NA	NA	1840	NA	NA	NA	1	1840	4	3
1340	145116394866698	9	1	38	4	4	4	2	72132	4	2	1	5	72	6	3	2	18	12	11	1	17	4	4	4	3	1	NA	2	2	2	2	9	6	6	4	2	5	5	NA	NA	NA	NA	3300	NA	2.1	1571.42857142857	4	1
1341	145116394869778	9	1	44	4	4	5	2	54099	3	2	1	5	54	3	2	2	15	1	1	1	16	4	4	4	3	1	NA	2	2	2	2	7	5	4	4	2	5	5	NA	NA	NA	NA	3200	NA	2.1	1523.80952380952	4	1
1342	145116394911793	9	2	44	4	4	5	4	94081	9	5	4	10	94	1	1	1	12	8	7	1	23	6	6	6	3	1	NA	2	2	2	2	9	6	6	1	NA	3	3	NA	NA	1700	NA	NA	NA	1	1700	4	4
1343	145116394919995	9	1	55	5	5	6	2	75111	9	5	1	11	75	1	1	1	12	8	7	1	15	4	4	4	4	2	NA	2	3	3	2	10	7	7	1	NA	4	4	NA	NA	NA	2500	NA	NA	1	2500	2	3
1344	145116394945622	9	1	61	5	5	7	2	10030	7	4	3	2	10	4	2	2	8	1	1	1	15	4	4	4	3	1	NA	2	2	2	2	9	6	6	2	0	4	4	NA	NA	NA	2200	NA	NA	1.5	1466.66666666667	4	1
1345	145116394960996	9	1	33	3	3	4	1	44109	8	4	1	11	44	6	3	2	18	12	11	1	16	4	4	4	3	1	NA	2	2	2	1	1	1	1	1	NA	5	5	NA	NA	NA	NA	3000	NA	1	3000	2	3
1346	145116394966118	9	2	33	3	3	4	3	94079	9	5	3	8	94	1	1	1	12	8	7	1	20	5	5	5	9	1	NA	2	2	2	2	8	6	5	1	NA	2	2	NA	1400	NA	NA	NA	NA	1	1400	4	4
1347	145116394969194	9	2	52	5	5	6	4	92077	9	5	2	7	92	1	1	1	12	8	7	1	23	6	6	6	3	1	NA	2	2	2	2	11	8	8	3	0	4	4	NA	NA	NA	2500	NA	NA	2	1250	5	4
1348	145116394970221	9	2	49	4	4	5	4	37261	8	4	1	11	37	5	3	2	7	6	6	1	12	4	4	4	3	1	NA	2	2	2	2	11	8	8	2	0	4	4	NA	NA	NA	2700	NA	NA	1.5	1800	4	1
1349	145116394992641	9	1	37	4	4	4	2	31555	8	4	1	11	31	7	4	2	16	9	8	1	16	4	4	4	3	1	NA	2	2	2	2	8	6	5	3	1	3	3	NA	NA	1800	NA	NA	NA	1.8	1000	5	1
1350	145116394997774	9	1	39	4	4	4	2	45195	1	1	6	1	45	5	3	2	7	6	6	1	14	4	4	4	3	1	NA	2	2	2	2	11	8	8	3	0	5	5	NA	NA	NA	NA	3500	NA	2	1750	4	1
1351	145116395011098	9	1	32	3	3	4	1	23092	1	1	6	1	23	7	4	2	14	2	2	1	12	4	4	4	3	1	NA	2	2	2	2	10	7	7	4	2	5	5	NA	NA	NA	NA	3200	NA	2.1	1523.80952380952	4	1
1352	145116395013155	9	2	50	5	5	6	4	92025	9	5	3	10	92	1	1	1	12	8	7	1	20	5	5	5	3	1	NA	2	2	2	2	8	6	5	3	0	4	4	NA	NA	NA	2400	NA	NA	2	1200	5	2
1353	145116395013156	9	1	53	5	5	6	2	51454	8	4	1	11	51	4	2	2	8	1	1	1	14	4	4	4	5	2	2	3	5	4	2	5	4	3	1	NA	3	3	NA	NA	1998	NA	NA	NA	1	1998	3	3
1354	145116395024434	9	1	51	5	5	6	2	18279	5	3	1	8	18	5	3	2	7	6	6	1	26	6	6	6	3	1	NA	2	2	2	2	9	6	6	3	0	4	4	NA	NA	NA	2800	NA	NA	2	1400	4	1
1355	145116395026483	9	2	53	5	5	6	4	34301	6	3	1	9	34	9	5	2	13	9	8	1	22	5	5	5	3	1	NA	2	2	2	2	7	5	4	7	4	3	3	NA	NA	1700	NA	NA	NA	3.2	531.25	6	3
1356	145116395057216	9	2	47	4	4	5	4	2003	1	1	6	2	2	4	2	2	19	10	9	5	NA	9	8	8	NA	NA	NA	6	8	NA	1	5	1	3	4	0	5	5	NA	NA	NA	NA	3350	NA	2.5	1340	4	2
1357	145116395066435	9	2	58	5	5	6	4	27507	2	2	5	4	27	5	3	2	11	11	10	1	23	6	6	6	3	1	NA	2	2	2	2	7	5	4	2	0	5	5	NA	NA	NA	NA	3300	NA	1.5	2200	3	1
1358	145116395066436	9	2	27	3	3	3	3	26155	1	1	6	2	26	8	5	2	22	3	3	2	23	6	6	6	6	2	4	5	7	5	2	7	5	4	2	0	2	2	NA	1200	NA	NA	NA	NA	1.5	800	6	3
1359	145116395074636	9	2	48	4	4	5	4	35179	1	1	6	4	35	6	3	2	6	5	5	1	18	5	5	5	7	2	2	3	5	4	2	7	5	4	2	0	5	5	NA	NA	NA	NA	3900	NA	1.5	2600	2	1
1360	145116395094125	9	2	50	5	5	6	4	13001	8	4	3	11	13	9	5	2	21	13	12	1	18	5	5	5	5	2	3	3	4	4	2	10	7	7	2	0	2	2	NA	1300	NA	NA	NA	NA	1.5	866.666666666667	6	3
1361	145116395128846	9	1	42	4	4	5	2	57415	8	4	2	2	57	3	2	2	15	1	1	1	24	6	6	6	3	1	NA	2	2	2	2	8	6	5	3	1	6	6	NA	NA	NA	NA	NA	4500	1.8	2500	2	1
1362	145116395137045	9	1	54	5	5	6	2	38449	5	3	4	5	38	8	5	2	22	3	3	1	17	4	4	4	3	1	NA	2	2	2	2	9	6	6	3	0	6	6	NA	NA	NA	NA	NA	4100	2	2050	3	1
1363	145116395138074	9	2	59	5	5	6	4	13209	8	4	1	11	13	9	5	2	21	13	12	1	20	5	5	5	3	1	NA	2	2	2	2	11	8	8	3	0	5	5	NA	NA	NA	NA	3200	NA	2	1600	4	1
1364	145116395162672	9	2	58	5	5	6	4	59152	8	4	4	7	59	2	2	2	17	10	9	1	11	4	4	4	5	2	2	3	5	4	1	10	1	7	3	0	6	6	NA	NA	NA	NA	NA	4200	2	2100	3	1
1365	145116395174973	9	2	58	5	5	6	4	68376	8	4	3	7	68	3	2	2	1	1	1	1	22	5	5	5	3	1	NA	2	2	2	2	7	5	4	2	0	4	4	NA	NA	NA	2500	NA	NA	1.5	1666.66666666667	4	1
1366	145116395409441	9	2	41	4	4	5	4	33550	8	4	3	9	33	7	4	2	2	2	2	1	12	4	4	4	6	2	2	3	5	4	2	10	7	7	2	0	3	3	NA	NA	1990	NA	NA	NA	1.5	1326.66666666667	4	2
1367	145116395470914	9	1	56	5	5	6	2	31045	1	1	6	1	31	7	4	2	16	9	8	1	23	6	6	6	3	1	NA	2	2	2	2	10	7	7	2	0	5	5	NA	NA	NA	NA	3750	NA	1.5	2500	2	1
1368	145116395496531	9	2	52	5	5	6	4	49007	8	4	1	11	49	6	3	2	18	12	11	1	27	6	6	6	3	1	NA	2	2	2	2	6	5	4	2	0	7	7	NA	NA	NA	NA	NA	NA	NA	NA	NA	3
1369	145116395632673	9	2	25	3	3	3	3	76425	1	1	6	1	76	5	3	2	11	11	10	1	18	5	5	5	5	2	3	3	4	4	2	9	6	6	4	0	4	4	NA	NA	NA	2450	NA	NA	2.5	980	5	2
1370	145116395757669	9	1	40	4	4	5	2	83061	6	3	1	10	83	9	5	2	21	13	12	1	26	6	6	6	3	1	NA	2	2	2	2	11	8	8	4	2	6	6	NA	NA	NA	NA	NA	4100	2.1	1952.38095238095	3	1
1371	145116395801725	9	1	40	4	4	5	2	75120	9	5	1	11	75	1	1	1	12	8	7	1	2	2	2	2	1	3	NA	1	1	1	2	9	6	6	1	NA	6	6	NA	NA	NA	NA	NA	5200	1	5200	1	4
1372	145116396146780	9	1	50	5	5	6	2	89341	1	1	6	1	89	4	2	2	5	4	4	1	18	5	5	5	5	2	2	3	5	4	2	6	5	4	5	3	5	5	NA	NA	NA	NA	3800	NA	2.4	1583.33333333333	4	1
1373	145116396237928	9	2	26	3	3	3	3	78586	9	5	3	10	78	1	1	1	12	8	7	1	6	3	3	3	3	1	NA	2	2	2	2	8	6	5	1	NA	3	3	NA	NA	1800	NA	NA	NA	1	1800	4	3
1374	145116396309570	9	2	32	3	3	4	3	83137	8	4	1	11	83	9	5	2	21	13	12	2	18	5	5	5	5	2	3	5	7	5	2	10	7	7	3	1	5	5	NA	NA	NA	NA	3200	NA	1.8	1777.77777777778	4	1
1375	145116396333116	9	1	29	3	3	3	1	67464	1	1	6	1	67	3	2	2	1	1	1	1	25	6	6	6	3	1	NA	2	2	2	2	6	5	4	3	0	3	3	NA	NA	1900	NA	NA	NA	2	950	5	2
1376	145119175125106	9	1	45	4	4	5	2	45278	2	2	4	2	45	5	3	2	7	6	6	1	16	4	4	4	3	1	NA	2	2	2	2	10	7	7	2	1	4	4	NA	NA	NA	2000	NA	NA	1.3	1538.46153846154	4	3
1377	145119175139455	9	1	61	5	5	7	2	75103	9	5	1	11	75	1	1	1	12	8	7	1	6	3	3	3	5	2	2	3	5	4	2	11	8	8	2	0	6	6	NA	NA	NA	NA	NA	12000	1.5	8000	1	1
1378	145119175187465	9	2	57	5	5	6	4	62555	8	4	4	5	62	2	2	2	17	10	9	7	22	8	7	8	NA	NA	NA	8	8	NA	2	8	6	5	1	NA	1	1	750	NA	NA	NA	NA	NA	1	750	6	3
1379	145119175296112	9	2	22	2	2	3	3	7019	5	3	1	7	7	8	5	2	22	3	3	6	24	8	7	8	NA	NA	NA	8	8	NA	2	9	6	6	3	1	3	3	NA	NA	1700	NA	NA	NA	1.8	944.444444444444	5	1
1380	145119175301246	9	1	52	5	5	6	2	87085	7	4	1	11	87	7	4	2	14	2	2	1	3	2	2	2	1	3	NA	1	1	1	2	10	7	7	1	NA	2	2	NA	1499	NA	NA	NA	NA	1	1499	4	3
1381	145119175305217	9	1	63	5	5	7	2	1156	1	1	6	1	1	8	5	2	22	3	3	3	10	7	7	7	NA	NA	NA	7	8	NA	2	10	7	7	2	0	5	5	NA	NA	NA	NA	3800	NA	1.5	2533.33333333333	2	1
1382	145119175321605	9	2	64	5	5	7	4	56013	3	2	1	4	56	6	3	2	6	5	5	3	22	8	7	7	NA	NA	NA	7	8	NA	2	9	6	6	2	0	7	7	NA	NA	NA	NA	NA	NA	NA	NA	NA	1
1383	145119175394323	9	2	24	2	2	3	3	13047	8	4	3	9	13	9	5	2	21	13	12	5	NA	9	8	8	NA	NA	NA	6	8	NA	1	11	1	8	2	0	2	2	NA	1200	NA	NA	NA	NA	1.5	800	6	2
1384	145119175424038	9	2	22	2	2	3	3	30189	7	4	1	11	30	9	5	2	13	9	8	5	NA	9	8	8	NA	NA	NA	6	8	NA	1	11	1	8	1	NA	1	1	200	NA	NA	NA	NA	NA	1	200	6	4
1385	145119175443550	9	2	20	2	2	3	3	69382	8	4	1	11	69	8	5	2	22	3	3	5	NA	9	8	8	NA	NA	NA	6	8	NA	1	10	1	7	1	NA	1	1	160	NA	NA	NA	NA	NA	1	160	6	2
1386	145119175500895	9	2	52	5	5	6	4	8159	1	1	6	1	8	4	2	2	8	1	1	1	25	6	6	6	3	1	NA	2	2	2	2	7	5	4	4	1	4	4	NA	NA	NA	2800	NA	NA	2.3	1217.39130434783	5	1
1387	145119175809148	9	2	43	4	4	5	4	38537	5	3	3	5	38	8	5	2	22	3	3	7	25	8	7	8	NA	NA	NA	8	8	NA	2	6	5	4	3	1	2	2	NA	1400	NA	NA	NA	NA	1.8	777.777777777778	6	1
1388	145119175813134	9	2	43	4	4	5	4	18033	6	3	1	10	18	5	3	2	7	6	6	1	5	3	3	3	1	3	NA	1	1	1	1	10	1	7	4	1	2	2	NA	1080	NA	NA	NA	NA	2.3	469.565217391304	6	2
1389	145119175818274	9	2	71	6	6	8	4	21531	1	1	6	1	21	4	2	2	5	4	4	3	11	7	7	7	NA	NA	NA	7	8	NA	2	10	7	7	1	NA	4	4	NA	NA	NA	2660	NA	NA	1	2660	2	4
1390	145119175818275	9	2	75	7	6	8	4	76254	1	1	6	2	76	5	3	2	11	11	10	3	6	7	7	7	NA	NA	NA	7	8	NA	2	8	6	5	1	NA	4	4	NA	NA	NA	2159	NA	NA	1	2159	3	4
1391	145119175823402	9	2	64	5	5	7	4	69385	8	4	1	11	69	8	5	2	22	3	3	3	17	7	7	7	NA	NA	NA	7	8	NA	2	10	7	7	2	0	4	4	NA	NA	NA	2500	NA	NA	1.5	1666.66666666667	4	2
1392	145119175836717	9	1	44	4	4	5	2	76005	8	4	3	3	76	5	3	2	11	11	10	1	10	3	3	3	3	1	NA	2	2	2	2	11	8	8	5	3	6	6	NA	NA	NA	NA	NA	5000	2.4	2083.33333333333	3	1
1393	145119175920686	9	1	45	4	4	5	2	69244	8	4	2	8	69	8	5	2	22	3	3	1	16	4	4	4	3	1	NA	2	2	2	2	9	6	6	3	0	3	3	NA	NA	1600	NA	NA	NA	2	800	6	1
1394	145119175950431	9	1	62	5	5	7	2	77239	1	1	6	2	77	1	1	1	12	8	7	3	17	7	7	7	NA	NA	NA	7	8	NA	2	6	5	4	2	0	4	4	NA	NA	NA	2999	NA	NA	1.5	1999.33333333333	3	1
1395	145119175990383	9	2	26	3	3	3	3	77257	2	2	1	4	77	1	1	1	12	8	7	2	15	4	4	4	8	2	NA	5	7	5	2	9	6	6	3	1	3	3	NA	NA	1999	NA	NA	NA	1.8	1110.55555555556	5	1
1396	145119176010879	9	2	69	6	6	7	4	38462	1	1	6	1	38	8	5	2	22	3	3	3	14	7	7	7	NA	NA	NA	7	8	NA	2	5	4	3	2	0	5	5	NA	NA	NA	NA	3800	NA	1.5	2533.33333333333	2	1
1397	145119176115234	9	1	54	5	5	6	2	80489	7	4	4	5	80	4	2	2	19	10	9	1	7	3	3	3	6	2	2	3	5	4	2	8	6	5	3	0	6	6	NA	NA	NA	NA	NA	5000	2	2500	2	1
1398	145119176172575	9	2	30	3	3	4	3	56120	1	1	6	2	56	6	3	2	6	5	5	1	3	2	2	2	1	3	NA	1	1	1	2	9	6	6	2	0	4	4	NA	NA	NA	2100	NA	NA	1.5	1400	4	1
1399	145119176199220	9	1	39	4	4	4	2	92002	9	5	2	10	92	1	1	1	12	8	7	2	21	5	5	5	3	1	NA	5	7	5	2	9	6	6	1	NA	1	1	990	NA	NA	NA	NA	NA	1	990	5	3
1400	145119176231957	9	2	67	6	6	7	4	34123	8	4	3	7	34	9	5	2	13	9	8	3	18	8	7	7	NA	NA	NA	7	8	NA	2	7	5	4	2	0	6	6	NA	NA	NA	NA	NA	4500	1.5	3000	2	1
1401	145119176250439	9	2	30	3	3	4	3	71076	6	3	1	9	71	4	2	2	5	4	4	1	28	6	6	6	3	1	NA	2	2	2	2	9	6	6	2	0	5	5	NA	NA	NA	NA	3100	NA	1.5	2066.66666666667	3	1
1402	145119176289307	9	1	53	5	5	6	2	41104	6	3	3	3	41	5	3	2	7	6	6	1	7	3	3	3	5	2	2	3	5	4	2	11	8	8	2	0	7	7	NA	NA	NA	NA	NA	NA	NA	NA	NA	1
1403	145119176350810	9	1	36	4	4	4	2	31182	8	4	3	5	31	7	4	2	16	9	8	1	24	6	6	6	3	1	NA	2	2	2	2	9	6	6	1	NA	3	3	NA	NA	1778	NA	NA	NA	1	1778	4	3
1404	145119176426566	9	1	53	5	5	6	2	54184	8	4	3	5	54	3	2	2	15	1	1	1	9	3	3	3	4	2	NA	2	3	3	2	11	8	8	1	NA	7	7	NA	NA	NA	NA	NA	NA	NA	NA	NA	4
1405	145119176433749	9	1	52	5	5	6	2	76631	1	1	6	2	76	5	3	2	11	11	10	7	20	8	7	8	NA	NA	NA	8	8	NA	2	9	6	6	2	0	3	3	NA	NA	1885	NA	NA	NA	1.5	1256.66666666667	5	4
1406	145119176454234	9	2	50	5	5	6	4	70285	4	2	1	7	70	3	2	2	10	4	4	1	18	5	5	5	4	2	NA	2	3	3	2	6	5	4	2	0	7	7	NA	NA	NA	NA	NA	NA	NA	NA	NA	1
1407	145119176474727	9	1	69	6	6	7	2	10305	1	1	6	1	10	4	2	2	8	1	1	3	25	8	7	7	NA	NA	NA	7	8	NA	2	6	5	4	2	0	3	3	NA	NA	1950	NA	NA	NA	1.5	1300	5	1
1408	145119176577090	9	2	55	5	5	6	4	75111	9	5	1	11	75	1	1	1	12	8	7	1	12	4	4	4	3	1	NA	2	2	2	2	10	7	7	2	0	5	5	NA	NA	NA	NA	3200	NA	1.5	2133.33333333333	3	2
1409	145119176616032	9	2	38	4	4	4	4	62530	1	1	6	1	62	2	2	2	17	10	9	6	20	8	7	8	NA	NA	NA	8	8	NA	2	8	6	5	7	4	4	4	NA	NA	NA	2500	NA	NA	3.2	781.25	6	1
1410	145119176633463	9	2	59	5	5	6	4	69389	8	4	1	11	69	8	5	2	22	3	3	7	22	8	7	8	NA	NA	NA	8	8	NA	2	7	5	4	1	NA	1	1	885	NA	NA	NA	NA	NA	1	885	6	4
1411	145119176696902	9	1	59	5	5	6	2	7183	2	2	4	1	7	8	5	2	22	3	3	3	18	8	7	7	NA	NA	NA	7	8	NA	2	7	5	4	2	0	1	1	600	NA	NA	NA	NA	NA	1.5	400	6	1
1412	145119176714322	9	2	77	7	6	8	4	83098	8	4	3	7	83	9	5	2	21	13	12	3	12	7	7	7	NA	NA	NA	7	8	NA	2	9	6	6	1	NA	2	2	NA	1410	NA	NA	NA	NA	1	1410	4	3
1413	145119176780859	9	2	58	5	5	6	4	42222	6	3	3	5	42	8	5	2	22	3	3	1	21	5	5	5	3	1	NA	2	2	2	2	8	6	5	2	0	5	5	NA	NA	NA	NA	3200	NA	1.5	2133.33333333333	3	1
1414	145119176867958	9	2	75	7	6	8	4	75115	9	5	1	11	75	1	1	1	12	8	7	3	6	7	7	7	NA	NA	NA	7	8	NA	2	7	5	4	2	0	6	6	NA	NA	NA	NA	NA	4800	1.5	3200	1	1
1415	145119176950872	9	1	42	4	4	5	2	56007	5	3	1	7	56	6	3	2	6	5	5	1	5	3	3	3	1	3	NA	1	1	1	2	11	8	8	3	2	1	1	518	NA	NA	NA	NA	NA	1.6	323.75	6	3
1416	145119176957054	9	1	58	5	5	6	2	26041	3	2	3	2	26	8	5	2	22	3	3	1	10	3	3	3	3	1	NA	2	2	2	2	11	8	8	2	0	6	6	NA	NA	NA	NA	NA	7000	1.5	4666.66666666667	1	1
1417	145119176976392	9	1	75	7	6	8	2	78465	2	2	1	3	78	1	1	1	12	8	7	3	10	7	7	7	NA	NA	NA	7	8	NA	2	10	7	7	1	NA	7	7	NA	NA	NA	NA	NA	NA	NA	NA	NA	3
1418	145119176977419	9	2	68	6	6	7	4	34172	8	4	1	11	34	9	5	2	13	9	8	3	7	7	7	7	NA	NA	NA	7	8	NA	2	11	8	8	2	0	4	4	NA	NA	NA	2600	NA	NA	1.5	1733.33333333333	4	1
1419	145119176985615	9	1	42	4	4	5	2	68376	8	4	3	7	68	3	2	2	1	1	1	2	2	2	2	2	1	3	NA	5	7	5	2	3	2	1	1	NA	7	7	NA	NA	NA	NA	NA	NA	NA	NA	NA	3
1420	145119176995872	9	1	57	5	5	6	2	11413	1	1	6	1	11	9	5	2	13	9	8	1	22	5	5	5	3	1	NA	2	2	2	2	11	8	8	3	0	5	5	NA	NA	NA	NA	3500	NA	2	1750	4	1
1421	145119177077832	9	1	40	4	4	5	2	67218	8	4	3	8	67	3	2	2	1	1	1	1	4	2	2	2	1	3	NA	1	1	1	2	9	6	6	4	2	5	5	NA	NA	NA	NA	3420	NA	2.1	1628.57142857143	4	1
1422	145119177140259	9	1	38	4	4	4	2	21231	8	4	1	11	21	4	2	2	5	4	4	1	11	4	4	4	3	1	NA	2	2	2	2	11	8	8	4	2	6	6	NA	NA	NA	NA	NA	4800	2.1	2285.71428571429	3	1
1423	145119177145383	9	2	65	6	6	7	4	68224	8	4	1	11	68	3	2	2	1	1	1	3	9	7	7	7	NA	NA	NA	7	8	NA	2	11	8	8	2	0	6	6	NA	NA	NA	NA	NA	5250	1.5	3500	1	1
1424	145119177165883	9	2	72	6	6	8	4	49244	4	2	5	7	49	6	3	2	18	12	11	3	14	7	7	7	NA	NA	NA	7	8	NA	2	6	5	4	1	NA	2	2	NA	1280	NA	NA	NA	NA	1	1280	5	3
1425	145119177200724	9	1	45	4	4	5	2	44109	8	4	1	11	44	6	3	2	18	12	11	1	3	2	2	2	1	3	NA	1	1	1	2	11	8	8	1	NA	5	5	NA	NA	NA	NA	3900	NA	1	3900	1	4
1426	145119177255938	9	2	20	2	2	3	3	92025	9	5	3	10	92	1	1	1	12	8	7	5	NA	9	8	8	NA	NA	NA	6	8	NA	1	8	1	5	5	0	7	7	NA	NA	NA	NA	NA	NA	NA	NA	NA	4
1427	145119177263159	9	1	39	4	4	4	2	75115	9	5	1	11	75	1	1	1	12	8	7	1	21	5	5	5	3	1	NA	2	2	2	2	6	5	4	1	NA	2	2	NA	1200	NA	NA	NA	NA	1	1200	5	4
1428	145119177273403	9	1	50	5	5	6	2	94069	9	5	2	7	94	1	1	1	12	8	7	1	20	5	5	5	3	1	NA	2	2	2	2	11	8	8	3	0	3	3	NA	NA	1930	NA	NA	NA	2	965	5	2
1429	145119177293900	9	2	46	4	4	5	4	73151	7	4	3	4	73	8	5	2	22	3	3	7	3	7	7	8	NA	NA	NA	8	8	NA	2	11	8	8	1	NA	1	1	500	NA	NA	NA	NA	NA	1	500	6	2
1430	145119177299030	9	2	49	4	4	5	4	40230	1	1	6	3	40	7	4	2	2	2	2	7	20	8	7	8	NA	NA	NA	8	8	NA	2	9	6	6	4	0	7	7	NA	NA	NA	NA	NA	NA	NA	NA	NA	1
1431	145119177408582	9	1	52	5	5	6	2	62193	7	4	1	10	62	2	2	2	17	10	9	1	7	3	3	3	5	2	2	3	5	4	2	11	8	8	1	NA	5	5	NA	NA	NA	NA	3200	NA	1	3200	1	3
1432	145119177412680	9	1	43	4	4	5	2	92002	9	5	2	10	92	1	1	1	12	8	7	1	17	4	4	4	3	1	NA	2	2	2	2	11	8	8	4	2	4	4	NA	NA	NA	2990	NA	NA	2.1	1423.80952380952	4	1
1433	145119177419867	9	2	54	5	5	6	4	27406	1	1	6	1	27	5	3	2	11	11	10	1	22	5	5	5	9	1	NA	2	2	2	2	9	6	6	2	0	7	7	NA	NA	NA	NA	NA	NA	NA	NA	NA	1
1434	145119177429090	9	2	44	4	4	5	4	56146	1	1	6	2	56	6	3	2	6	5	5	2	27	6	6	6	3	1	NA	5	7	5	2	9	6	6	1	NA	2	2	NA	1440	NA	NA	NA	NA	1	1440	4	3
1435	145119177485344	9	1	40	4	4	5	2	59350	8	4	1	11	59	2	2	2	17	10	9	1	2	2	2	2	1	3	NA	1	1	1	2	6	5	4	8	3	2	2	NA	1250	NA	NA	NA	NA	3.9	320.51282051282	6	3
1436	145119177561192	9	1	72	6	6	8	2	64445	7	4	1	10	64	7	4	2	2	2	2	3	6	7	7	7	NA	NA	NA	7	8	NA	2	8	6	5	2	0	5	5	NA	NA	NA	NA	3250	NA	1.5	2166.66666666667	3	1
1437	145119177597048	9	2	52	5	5	6	4	77067	9	5	2	7	77	1	1	1	12	8	7	6	7	7	7	8	NA	NA	NA	8	8	NA	2	11	8	8	5	0	6	6	NA	NA	NA	NA	NA	4500	3	1500	4	1
1438	145119177625623	9	1	20	2	2	3	1	79191	6	3	1	10	79	6	3	2	20	2	2	1	10	3	3	3	3	1	NA	2	2	2	2	10	7	7	1	NA	2	2	NA	1004	NA	NA	NA	NA	1	1004	5	2
1439	145119177686050	9	2	51	5	5	6	4	42143	1	1	6	1	42	8	5	2	22	3	3	2	23	6	6	6	3	1	NA	5	7	5	2	6	5	4	2	0	3	3	NA	NA	1600	NA	NA	NA	1.5	1066.66666666667	5	2
1440	145119177697286	9	1	50	5	5	6	2	14488	3	2	5	6	14	5	3	2	4	11	10	3	19	8	7	7	NA	NA	NA	7	8	NA	2	7	5	4	4	0	3	3	NA	NA	1550	NA	NA	NA	2.5	620	6	1
1441	145119177716754	9	1	63	5	5	7	2	29019	8	4	1	11	29	6	3	2	6	5	5	3	9	7	7	7	NA	NA	NA	7	8	NA	2	11	8	8	3	0	5	5	NA	NA	NA	NA	3200	NA	2	1600	4	1
1442	145119177720861	9	2	51	5	5	6	4	34050	1	1	6	2	34	9	5	2	13	9	8	6	3	7	7	8	NA	NA	NA	8	8	NA	2	5	4	3	4	0	4	4	NA	NA	NA	2001	NA	NA	2.5	800.4	6	3
1443	145119177818144	9	2	18	2	2	2	3	38382	8	4	2	7	38	8	5	2	22	3	3	5	NA	9	8	8	NA	NA	NA	6	8	NA	1	5	1	3	4	0	7	7	NA	NA	NA	NA	NA	NA	NA	NA	NA	4
1444	145119177859181	9	1	37	4	4	4	2	35136	3	2	5	5	35	6	3	2	6	5	5	1	23	6	6	6	3	1	NA	2	2	2	2	10	7	7	4	2	5	5	NA	NA	NA	NA	3200	NA	2.1	1523.80952380952	4	1
1445	145119177864196	9	1	54	5	5	6	2	75112	9	5	1	11	75	1	1	1	12	8	7	1	18	5	5	5	6	2	2	3	5	4	2	9	6	6	3	1	7	7	NA	NA	NA	NA	NA	NA	NA	NA	NA	1
1446	145119178072177	9	1	27	3	3	3	1	74010	7	4	1	11	74	8	5	2	22	3	3	1	19	5	5	5	5	2	2	3	5	4	2	8	6	5	3	1	5	5	NA	NA	NA	NA	3700	NA	1.8	2055.55555555556	3	1
1447	145119178092563	9	1	79	7	6	8	2	2500	1	1	6	1	2	4	2	2	19	10	9	3	17	7	7	7	NA	NA	NA	7	8	NA	2	8	6	5	2	0	6	6	NA	NA	NA	NA	NA	6500	1.5	4333.33333333333	1	1
1448	145119178103846	9	2	52	5	5	6	4	42140	1	1	6	1	42	8	5	2	22	3	3	6	30	10	7	8	NA	NA	NA	8	8	NA	2	7	5	4	3	0	4	4	NA	NA	NA	2400	NA	NA	2	1200	5	1
1449	145119178248220	9	2	45	4	4	5	4	28074	1	1	6	1	28	5	3	2	7	6	6	1	20	5	5	5	3	1	NA	2	2	2	2	10	7	7	2	0	7	7	NA	NA	NA	NA	NA	NA	NA	NA	NA	1
1450	145119178265651	9	1	47	4	4	5	2	33452	1	1	6	1	33	7	4	2	2	2	2	1	9	3	3	3	3	1	NA	2	2	2	2	11	8	8	4	0	6	6	NA	NA	NA	NA	NA	5000	2.5	2000	3	1
1451	145119178299455	9	2	24	2	2	3	3	3220	1	1	6	1	3	8	5	2	3	3	3	3	27	8	7	7	NA	NA	NA	7	8	NA	2	6	5	4	1	NA	2	2	NA	1200	NA	NA	NA	NA	1	1200	5	1
1452	145119178434607	9	1	22	2	2	3	1	14197	1	1	6	2	14	5	3	2	4	11	10	7	18	8	7	8	NA	NA	NA	8	8	NA	1	9	1	6	5	1	6	6	NA	NA	NA	NA	NA	6500	2.8	2321.42857142857	3	2
1453	145119178434608	9	2	22	2	2	3	3	48021	1	1	6	1	7	8	5	2	22	3	3	5	NA	9	8	8	NA	NA	NA	6	8	NA	1	11	1	8	4	0	2	2	NA	1200	NA	NA	NA	NA	2.5	480	6	2
1454	145119178480702	9	2	66	6	6	7	4	65447	1	1	6	2	65	7	4	2	16	9	8	3	12	7	7	7	NA	NA	NA	7	8	NA	2	8	6	5	1	NA	2	2	NA	1200	NA	NA	NA	NA	1	1200	5	4
1455	145119178489925	9	2	42	4	4	5	4	34032	6	3	1	10	34	9	5	2	13	9	8	2	27	6	6	6	3	1	NA	5	7	5	2	5	4	3	5	2	2	2	NA	1499	NA	NA	NA	NA	2.6	576.538461538462	6	3
1456	145119178495047	9	2	48	4	4	5	4	72331	1	1	6	1	72	6	3	2	18	12	11	2	20	5	5	5	3	1	NA	5	7	5	2	9	6	6	3	1	1	1	998	NA	NA	NA	NA	NA	1.8	554.444444444444	6	3
1457	145119178650693	9	2	55	5	5	6	4	37261	8	4	1	11	37	5	3	2	7	6	6	7	20	8	7	8	NA	NA	NA	8	8	NA	2	7	5	4	1	NA	7	7	NA	NA	NA	NA	NA	NA	NA	NA	NA	4
1458	145119178651722	9	2	57	5	5	6	4	80021	7	4	1	11	80	4	2	2	19	10	9	1	22	5	5	5	9	1	NA	2	2	2	2	7	5	4	2	0	7	7	NA	NA	NA	NA	NA	NA	NA	NA	NA	1
1459	145119178658896	9	2	67	6	6	7	4	11262	6	3	5	10	11	9	5	2	13	9	8	3	2	7	7	7	NA	NA	NA	7	8	NA	2	6	5	4	1	NA	1	1	930	NA	NA	NA	NA	NA	1	930	5	3
1460	145119178745930	9	2	38	4	4	4	4	41082	1	1	6	12	41	5	3	2	7	6	6	1	18	5	5	5	6	2	2	3	5	4	2	8	6	5	4	2	4	4	NA	NA	NA	2550	NA	NA	2.1	1214.28571428571	5	1
1461	145119178746977	9	1	38	4	4	4	2	31085	1	1	6	1	31	7	4	2	16	9	8	1	3	2	2	2	1	3	NA	1	1	1	2	9	6	6	1	NA	2	2	NA	1400	NA	NA	NA	NA	1	1400	4	3
1462	145119178794085	9	1	48	4	4	5	2	75109	9	5	1	11	75	1	1	1	12	8	7	1	4	2	2	2	2	4	NA	2	1	1	2	11	8	8	5	3	6	6	NA	NA	NA	NA	NA	10000	2.4	4166.66666666667	1	1
1463	145119178797163	9	1	52	5	5	6	2	94077	9	5	3	8	94	1	1	1	12	8	7	1	20	5	5	5	3	1	NA	2	2	2	2	10	7	7	2	0	4	4	NA	NA	NA	2900	NA	NA	1.5	1933.33333333333	3	1
1464	145119179061350	9	1	60	5	5	7	2	35360	4	2	5	7	35	6	3	2	6	5	5	3	21	8	7	7	NA	NA	NA	7	8	NA	2	7	5	4	2	0	4	4	NA	NA	NA	2300	NA	NA	1.5	1533.33333333333	4	1
1465	145119179112563	9	2	58	5	5	6	4	29220	4	2	1	5	29	6	3	2	6	5	5	2	22	5	5	5	3	1	NA	5	7	5	2	7	5	4	1	NA	1	1	800	NA	NA	NA	NA	NA	1	800	6	3
1466	145119179122690	9	1	24	2	2	3	1	75117	9	5	1	11	75	1	1	1	12	8	7	1	9	3	3	3	3	1	NA	2	2	2	2	11	8	8	1	NA	3	3	NA	NA	1995	NA	NA	NA	1	1995	3	4
1467	145119179125768	9	2	80	7	6	8	4	79191	6	3	1	10	79	6	3	2	20	2	2	3	11	7	7	7	NA	NA	NA	7	8	NA	2	8	6	5	1	NA	4	4	NA	NA	NA	2761	NA	NA	1	2761	2	3
1468	145119179150368	9	2	19	2	2	2	3	49125	4	2	5	7	49	6	3	2	18	12	11	5	NA	9	8	8	NA	NA	NA	6	8	NA	1	8	1	5	5	1	7	7	NA	NA	NA	NA	NA	NA	NA	NA	NA	4
1469	145119179219062	9	1	48	4	4	5	2	31458	8	4	3	4	31	7	4	2	16	9	8	1	9	3	3	3	3	1	NA	2	2	2	2	11	8	8	2	0	7	7	NA	NA	NA	NA	NA	NA	NA	NA	NA	1
1470	145119179255808	9	2	52	5	5	6	4	33200	8	4	3	7	33	7	4	2	2	2	2	1	10	3	3	3	4	2	NA	2	3	3	2	10	7	7	4	0	5	5	NA	NA	NA	NA	3900	NA	2.5	1560	4	1
1471	145119179255933	9	2	63	5	5	7	4	60001	1	1	6	1	60	4	2	2	19	10	9	1	14	4	4	4	6	2	2	3	5	4	2	8	6	5	1	NA	5	5	NA	NA	NA	NA	3500	NA	1	3500	1	3
1472	145119179303947	9	2	51	5	5	6	4	80021	7	4	1	11	80	4	2	2	19	10	9	6	30	10	7	8	NA	NA	NA	8	8	NA	2	8	6	5	2	1	1	1	500	NA	NA	NA	NA	NA	1.3	384.615384615385	6	3
1473	145119179366429	9	2	46	4	4	5	4	66168	6	3	4	3	66	9	5	2	13	9	8	6	22	8	7	8	NA	NA	NA	8	8	NA	2	7	5	4	3	0	3	3	NA	NA	1900	NA	NA	NA	2	950	5	1
1474	145119179468830	9	2	38	4	4	4	4	56089	1	1	6	3	56	6	3	2	6	5	5	1	18	5	5	5	7	2	3	3	4	4	2	10	7	7	5	3	5	5	NA	NA	NA	NA	3200	NA	2.4	1333.33333333333	4	1
1475	145119179468845	9	1	20	2	2	3	1	49328	5	3	1	8	49	6	3	2	18	12	11	5	NA	9	8	8	NA	NA	NA	6	8	NA	1	10	1	7	5	0	7	7	NA	NA	NA	NA	NA	NA	NA	NA	NA	2
1476	145119179504700	9	2	54	5	5	6	4	70310	4	2	1	5	70	3	2	2	10	4	4	1	15	4	4	4	3	1	NA	2	2	2	2	10	7	7	2	0	3	3	NA	NA	1990	NA	NA	NA	1.5	1326.66666666667	4	3
1477	145119179505727	9	2	75	7	6	8	4	95250	5	3	1	6	95	1	1	1	12	8	7	3	20	8	7	7	NA	NA	NA	7	8	NA	2	4	3	2	2	0	4	4	NA	NA	NA	2800	NA	NA	1.5	1866.66666666667	3	1
1478	145119179514947	9	1	36	4	4	4	2	80021	7	4	1	11	80	4	2	2	19	10	9	1	18	5	5	5	6	2	2	3	5	4	2	8	6	5	4	2	4	4	NA	NA	NA	2985	NA	NA	2.1	1421.42857142857	4	1
1479	145119179522121	9	1	46	4	4	5	2	2165	5	3	4	2	2	4	2	2	19	10	9	1	19	5	5	5	3	1	NA	2	2	2	2	4	3	2	4	2	1	1	900	NA	NA	NA	NA	NA	2.1	428.571428571429	6	1
1480	145119179530326	9	1	66	6	6	7	2	59488	5	3	4	3	59	2	2	2	17	10	9	3	23	8	7	7	NA	NA	NA	7	8	NA	2	7	5	4	2	0	5	5	NA	NA	NA	NA	3180	NA	1.5	2120	3	1
1481	145119179619422	9	1	77	7	6	8	2	17179	5	3	3	2	17	6	3	2	20	2	2	3	19	8	7	7	NA	NA	NA	7	8	NA	2	9	6	6	2	0	5	5	NA	NA	NA	NA	3150	NA	1.5	2100	3	1
1482	145119179634798	9	1	47	4	4	5	2	54459	2	2	1	3	54	3	2	2	15	1	1	1	6	3	3	3	5	2	3	3	4	4	2	11	8	8	2	0	7	7	NA	NA	NA	NA	NA	NA	NA	NA	NA	3
1483	145119179639925	9	1	60	5	5	7	2	29175	1	1	6	3	29	6	3	2	6	5	5	7	26	8	7	8	NA	NA	NA	8	8	NA	2	6	5	4	1	NA	2	2	NA	1067	NA	NA	NA	NA	1	1067	5	3
1484	145119179722765	9	2	42	4	4	5	4	35281	8	4	4	7	35	6	3	2	6	5	5	1	5	3	3	3	1	3	NA	1	1	1	1	11	1	8	4	2	7	7	NA	NA	NA	NA	NA	NA	NA	NA	NA	1
1485	145119179748371	9	1	47	4	4	5	2	59582	1	1	6	1	59	2	2	2	17	10	9	1	16	4	4	4	3	1	NA	2	2	2	2	9	6	6	1	NA	3	3	NA	NA	1900	NA	NA	NA	1	1900	3	2
1486	145119179841641	9	1	43	4	4	5	2	69266	8	4	4	11	69	8	5	2	22	3	3	1	7	3	3	3	7	2	3	3	4	4	2	11	8	8	3	1	5	5	NA	NA	NA	NA	3900	NA	1.8	2166.66666666667	3	1
1487	145119179863153	9	1	50	5	5	6	2	8105	6	3	1	9	8	4	2	2	8	1	1	1	25	6	6	6	3	1	NA	2	2	2	2	6	5	4	3	0	4	4	NA	NA	NA	2999	NA	NA	2	1499.5	4	1
1488	145119179901957	9	2	37	4	4	4	4	31555	8	4	1	11	31	7	4	2	16	9	8	1	10	3	3	3	3	1	NA	2	2	2	2	11	8	8	1	NA	4	4	NA	NA	NA	2000	NA	NA	1	2000	3	4
1489	145119179928602	9	1	49	4	4	5	2	72181	8	4	1	11	72	6	3	2	18	12	11	1	20	5	5	5	3	1	NA	2	2	2	1	10	1	7	3	1	5	5	NA	NA	NA	NA	3900	NA	1.8	2166.66666666667	3	1
1490	145119179935781	9	1	38	4	4	4	2	94074	9	5	4	7	94	1	1	1	12	8	7	1	25	6	6	6	8	2	NA	2	3	3	2	8	6	5	4	2	3	3	NA	NA	1700	NA	NA	NA	2.1	809.52380952381	6	1
1491	145119180091436	9	1	66	6	6	7	2	91228	9	5	4	10	91	1	1	1	12	8	7	3	17	7	7	7	NA	NA	NA	7	8	NA	2	6	5	4	2	0	7	7	NA	NA	NA	NA	NA	NA	NA	NA	NA	1
1492	145119180243993	9	1	47	4	4	5	2	94022	9	5	4	9	94	1	1	1	12	8	7	1	10	3	3	3	3	1	NA	2	2	2	2	11	8	8	2	0	5	5	NA	NA	NA	NA	3500	NA	1.5	2333.33333333333	3	3
1493	145119180447782	9	2	40	4	4	5	4	63084	1	1	6	2	63	8	5	2	3	3	3	7	6	7	7	8	NA	NA	NA	8	8	NA	2	10	7	7	1	NA	5	5	NA	NA	NA	NA	3200	NA	1	3200	1	4
1494	145119180454975	9	2	42	4	4	5	4	31291	8	4	2	6	31	7	4	2	16	9	8	2	10	3	3	3	1	3	NA	5	7	5	2	11	8	8	5	1	6	6	NA	NA	NA	NA	NA	5000	2.8	1785.71428571429	4	1
1495	145119180461122	9	2	55	5	5	6	4	75120	9	5	1	11	75	1	1	1	12	8	7	7	20	8	7	8	NA	NA	NA	8	8	NA	2	8	6	5	1	NA	3	3	NA	NA	1785	NA	NA	NA	1	1785	4	3
1496	145119180469324	9	1	77	7	6	8	2	75111	9	5	1	11	75	1	1	1	12	8	7	3	10	7	7	7	NA	NA	NA	7	8	NA	2	11	8	8	2	0	6	6	NA	NA	NA	NA	NA	5500	1.5	3666.66666666667	1	1
1497	145119180634185	9	1	20	2	2	3	1	56098	7	4	4	8	56	6	3	2	6	5	5	5	NA	9	8	8	NA	NA	NA	6	8	NA	1	8	1	5	2	0	3	3	NA	NA	1900	NA	NA	NA	1.5	1266.66666666667	5	1
1498	145119180635229	9	2	20	2	2	3	3	34032	6	3	1	10	34	9	5	2	13	9	8	4	NA	10	8	8	NA	NA	NA	5	8	5	2	8	6	5	4	3	2	2	NA	1400	NA	NA	NA	NA	1.9	736.842105263158	6	3
1499	145119180702743	9	1	50	5	5	6	2	71073	3	2	1	5	71	4	2	2	5	4	4	1	9	3	3	3	2	4	NA	2	1	1	2	8	6	5	3	1	6	6	NA	NA	NA	NA	NA	4300	1.8	2388.88888888889	3	1
1500	145119180719172	9	1	20	2	2	3	1	93070	9	5	4	9	93	1	1	1	12	8	7	5	NA	9	8	8	NA	NA	NA	6	8	NA	1	8	1	5	5	1	3	3	NA	NA	1600	NA	NA	NA	2.8	571.428571428571	6	4
1501	145119180822634	9	2	18	2	2	2	3	67336	1	1	6	2	67	3	2	2	1	1	1	5	NA	9	8	8	NA	NA	NA	6	8	NA	1	5	1	3	3	1	7	7	NA	NA	NA	NA	NA	NA	NA	NA	NA	2
1502	145176470918271	9	2	21	2	2	3	3	2694	1	1	6	1	2	4	2	2	19	10	9	5	NA	9	8	8	NA	NA	NA	6	8	NA	1	10	1	7	4	0	7	7	NA	NA	NA	NA	NA	NA	NA	NA	NA	4
1503	145176471825531	9	2	23	2	2	3	3	57739	1	1	6	1	57	3	2	2	15	1	1	5	NA	9	8	8	NA	NA	NA	6	8	NA	1	9	1	6	3	0	1	1	950	NA	NA	NA	NA	NA	2	475	6	2
1504	145176472171582	9	2	21	2	2	3	3	17166	1	1	6	2	17	6	3	2	20	2	2	5	NA	9	8	8	NA	NA	NA	6	8	NA	1	9	1	6	4	0	5	5	NA	NA	NA	NA	3800	NA	2.5	1520	4	4
1505	145176472200265	9	2	40	4	4	5	4	79191	6	3	1	10	79	6	3	2	20	2	2	1	11	4	4	4	5	2	2	3	5	4	1	11	1	8	3	1	6	6	NA	NA	NA	NA	NA	5200	1.8	2888.88888888889	2	1
1506	145176472236112	9	2	19	2	2	2	3	52197	1	1	6	2	52	4	2	2	8	1	1	5	NA	9	8	8	NA	NA	NA	6	8	NA	1	9	1	6	5	0	7	7	NA	NA	NA	NA	NA	NA	NA	NA	NA	4
1507	145176472395778	9	2	19	2	2	2	3	79157	1	1	6	2	79	6	3	2	20	2	2	5	NA	9	8	8	NA	NA	NA	6	8	NA	1	8	1	5	4	0	5	5	NA	NA	NA	NA	3900	NA	2.5	1560	4	2
1508	145176473116769	9	2	18	2	2	2	3	59638	1	1	6	2	59	2	2	2	17	10	9	5	NA	9	8	8	NA	NA	NA	6	8	NA	1	8	1	5	4	0	7	7	NA	NA	NA	NA	NA	NA	NA	NA	NA	4
1509	145176476759142	9	2	19	2	2	2	3	59029	4	2	2	2	59	2	2	2	17	10	9	5	NA	9	8	8	NA	NA	NA	6	8	NA	1	8	1	5	4	1	7	7	NA	NA	NA	NA	NA	NA	NA	NA	NA	2
1510	145194353808441	10	1	43	4	4	5	2	44109	8	4	1	11	44	6	3	2	18	12	11	1	3	2	2	2	2	4	NA	2	1	1	2	11	8	8	3	1	6	6	NA	NA	NA	NA	NA	5000	1.8	2777.77777777778	2	1
1511	145194353857595	10	1	51	5	5	6	2	63124	8	4	3	8	63	8	5	2	3	3	3	1	16	4	4	4	3	1	NA	2	2	2	2	7	5	4	2	0	4	4	NA	NA	NA	2200	NA	NA	1.5	1466.66666666667	4	1
1512	145194353900606	10	1	52	5	5	6	2	95018	9	5	4	11	95	1	1	1	12	8	7	1	10	3	3	3	3	1	NA	2	2	2	2	11	8	8	4	2	4	4	NA	NA	NA	2700	NA	NA	2.1	1285.71428571429	5	1
1513	145194353954879	10	2	48	4	4	5	4	75115	9	5	1	11	75	1	1	1	12	8	7	1	20	5	5	5	3	1	NA	2	2	2	2	8	6	5	4	2	5	5	NA	NA	NA	NA	3800	NA	2.1	1809.52380952381	4	1
1514	145194353954880	10	2	62	5	5	7	4	75115	9	5	1	11	75	1	1	1	12	8	7	1	9	3	3	3	3	1	NA	2	2	2	2	11	8	8	2	0	5	5	NA	NA	NA	NA	3900	NA	1.5	2600	2	1
1515	145194354043981	10	1	45	4	4	5	2	75115	9	5	1	11	75	1	1	1	12	8	7	1	10	3	3	3	3	1	NA	2	2	2	2	11	8	8	2	0	6	6	NA	NA	NA	NA	NA	20000	1.5	13333.3333333333	1	1
1516	145194354046030	10	2	50	5	5	6	4	75120	9	5	1	11	75	1	1	1	12	8	7	1	12	4	4	4	7	2	2	3	5	4	2	11	8	8	2	0	6	6	NA	NA	NA	NA	NA	4200	1.5	2800	2	1
1517	145194354052191	10	1	42	4	4	5	2	81065	6	3	1	9	81	7	4	2	16	9	8	1	16	4	4	4	3	1	NA	2	2	2	2	10	7	7	5	2	4	4	NA	NA	NA	2880	NA	NA	2.6	1107.69230769231	5	1
1518	145194354052195	10	2	58	5	5	6	4	13023	8	4	2	4	13	9	5	2	21	13	12	1	5	3	3	3	1	3	NA	1	1	1	2	10	7	7	5	1	4	4	NA	NA	NA	2980	NA	NA	2.8	1064.28571428571	5	2
1519	145194354179182	10	1	33	3	3	4	1	75116	9	5	1	11	75	1	1	1	12	8	7	1	9	3	3	3	3	1	NA	2	2	2	2	11	8	8	2	0	5	5	NA	NA	NA	NA	3800	NA	1.5	2533.33333333333	2	1
1520	145194354232434	10	2	49	4	4	5	4	42218	8	4	1	11	42	8	5	2	22	3	3	1	15	4	4	4	3	1	NA	2	2	2	2	10	7	7	2	0	3	3	NA	NA	1650	NA	NA	NA	1.5	1100	5	3
1521	145194354257019	10	2	33	3	3	4	3	71270	5	3	1	9	71	4	2	2	5	4	4	1	20	5	5	5	3	1	NA	2	2	2	2	10	7	7	3	1	5	5	NA	NA	NA	NA	3700	NA	1.8	2055.55555555556	3	1
1522	145194354318337	10	1	45	4	4	5	2	84007	8	4	1	10	84	9	5	2	21	13	12	1	18	5	5	5	4	2	NA	2	3	3	2	11	8	8	1	NA	3	3	NA	NA	1710	NA	NA	NA	1	1710	4	4
1523	145194354331654	10	1	76	7	6	8	2	91195	1	1	6	1	91	1	1	1	12	8	7	3	9	7	7	7	NA	NA	NA	7	8	NA	2	8	6	5	1	NA	4	4	NA	NA	NA	2100	NA	NA	1	2100	3	4
1524	145194354392076	10	2	67	6	6	7	4	76474	8	4	3	5	76	5	3	2	11	11	10	3	7	7	7	7	NA	NA	NA	7	8	NA	2	11	8	8	2	0	4	4	NA	NA	NA	2990	NA	NA	1.5	1993.33333333333	3	1
1525	145194354400272	10	2	40	4	4	5	4	81306	1	1	6	1	81	7	4	2	16	9	8	1	22	5	5	5	9	1	NA	2	2	2	2	9	6	6	4	2	3	3	NA	NA	1995	NA	NA	NA	2.1	950	5	1
1526	145194354411540	10	2	43	4	4	5	4	94059	9	5	2	8	94	1	1	1	12	8	7	1	22	5	5	5	9	1	NA	2	2	2	2	9	6	6	4	1	5	5	NA	NA	NA	NA	3500	NA	2.3	1521.73913043478	4	1
1527	145194354462746	10	2	34	3	3	4	3	84089	4	2	5	8	84	9	5	2	21	13	12	1	22	5	5	5	3	1	NA	2	2	2	2	10	7	7	4	2	4	4	NA	NA	NA	2600	NA	NA	2.1	1238.09523809524	5	1
1528	145194354467869	10	1	50	5	5	6	2	76351	8	4	1	11	76	5	3	2	11	11	10	1	9	3	3	3	3	1	NA	2	2	2	2	10	7	7	2	1	5	5	NA	NA	NA	NA	3600	NA	1.3	2769.23076923077	2	2
1529	145194354484259	10	1	38	4	4	4	2	78646	9	5	2	10	78	1	1	1	12	8	7	1	19	5	5	5	5	2	2	3	5	4	2	8	6	5	3	1	6	6	NA	NA	NA	NA	NA	4600	1.8	2555.55555555556	2	1
1530	145194354484260	10	2	50	5	5	6	4	56098	7	4	4	8	56	6	3	2	6	5	5	1	18	5	5	5	5	2	2	3	5	4	2	2	2	1	1	NA	2	2	NA	1420	NA	NA	NA	NA	1	1420	4	3
1531	145194354495529	10	2	78	7	6	8	4	75105	9	5	1	11	75	1	1	1	12	8	7	3	5	7	7	7	NA	NA	NA	7	8	NA	2	9	6	6	1	NA	3	3	NA	NA	1900	NA	NA	NA	1	1900	3	3
1532	145194354513968	10	1	34	3	3	4	1	75118	9	5	1	11	75	1	1	1	12	8	7	1	10	3	3	3	3	1	NA	2	2	2	2	11	8	8	1	NA	5	5	NA	NA	NA	NA	3333	NA	1	3333	1	4
1533	145194354516018	10	1	41	4	4	5	2	67482	8	4	1	11	67	3	2	2	1	1	1	1	21	5	5	5	3	1	NA	2	2	2	2	8	6	5	4	2	4	4	NA	NA	NA	2500	NA	NA	2.1	1190.47619047619	5	1
1534	145194354533435	10	1	55	5	5	6	2	35188	3	2	5	5	35	6	3	2	6	5	5	1	9	3	3	3	3	1	NA	2	2	2	2	10	7	7	2	0	6	6	NA	NA	NA	NA	NA	4800	1.5	3200	1	1
1535	145194354540607	10	1	77	7	6	8	2	64445	7	4	1	10	64	7	4	2	2	2	2	3	9	7	7	7	NA	NA	NA	7	8	NA	2	6	5	4	1	NA	2	2	NA	1100	NA	NA	NA	NA	1	1100	5	3
1536	145194354540608	10	2	77	7	6	8	4	30189	7	4	1	11	30	9	5	2	13	9	8	3	15	7	7	7	NA	NA	NA	7	8	NA	2	10	7	7	1	NA	2	2	NA	1300	NA	NA	NA	NA	1	1300	5	3
1537	145194354548803	10	2	70	6	6	8	4	59060	1	1	6	1	59	2	2	2	17	10	9	3	22	8	7	7	NA	NA	NA	7	8	NA	2	7	5	4	3	0	7	7	NA	NA	NA	NA	NA	NA	NA	NA	NA	1
1538	145194354558022	10	1	33	3	3	4	1	29019	8	4	1	11	29	6	3	2	6	5	5	1	21	5	5	5	5	2	2	3	5	4	2	8	6	5	2	0	5	5	NA	NA	NA	NA	3500	NA	1.5	2333.33333333333	3	1
1539	145194354562120	10	2	88	7	6	8	4	69266	8	4	4	11	69	8	5	2	22	3	3	3	20	8	7	7	NA	NA	NA	7	8	NA	2	5	4	3	1	NA	7	7	NA	NA	NA	NA	NA	NA	NA	NA	NA	3
1540	145194354587731	10	2	53	5	5	6	4	56008	1	1	6	4	56	6	3	2	6	5	5	1	12	4	4	4	7	2	2	3	5	4	2	10	7	7	3	0	6	6	NA	NA	NA	NA	NA	4500	2	2250	3	1
1541	145194354606172	10	1	56	5	5	6	2	51454	8	4	1	11	51	4	2	2	8	1	1	1	10	3	3	3	3	1	NA	2	2	2	1	10	1	7	2	0	7	7	NA	NA	NA	NA	NA	NA	NA	NA	NA	1
1542	145194354691175	10	1	73	6	6	8	2	36045	2	2	5	3	36	5	3	2	7	6	6	3	15	7	7	7	NA	NA	NA	7	8	NA	2	10	7	7	2	0	4	4	NA	NA	NA	2400	NA	NA	1.5	1600	4	1
1543	145194354691176	10	2	28	3	3	3	3	62646	2	2	4	1	62	2	2	2	17	10	9	2	20	5	5	5	3	1	NA	5	7	5	2	10	7	7	3	1	4	4	NA	NA	NA	2999	NA	NA	1.8	1666.11111111111	4	1
1544	145194354823286	10	2	70	6	6	8	4	37261	8	4	1	11	37	5	3	2	7	6	6	3	7	7	7	7	NA	NA	NA	7	8	NA	2	11	8	8	1	NA	4	4	NA	NA	NA	2200	NA	NA	1	2200	3	3
1545	145194354866299	10	1	63	5	5	7	2	91228	9	5	4	10	91	1	1	1	12	8	7	1	9	3	3	3	3	1	NA	2	2	2	2	11	8	8	2	0	5	5	NA	NA	NA	NA	3300	NA	1.5	2200	3	1
1546	145194354886661	10	1	50	5	5	6	2	86075	1	1	6	1	86	6	3	2	20	2	2	1	23	6	6	6	3	1	NA	2	2	2	2	6	5	4	2	0	4	4	NA	NA	NA	2800	NA	NA	1.5	1866.66666666667	3	1
1547	145194354950173	10	1	41	4	4	5	2	91377	9	5	3	9	91	1	1	1	12	8	7	1	10	3	3	3	3	1	NA	2	2	2	2	11	8	8	4	2	6	6	NA	NA	NA	NA	NA	5300	2.1	2523.80952380952	2	1
1548	145194355000354	10	2	75	7	6	8	4	78481	9	5	2	7	78	1	1	1	12	8	7	3	14	7	7	7	NA	NA	NA	7	8	NA	2	9	6	6	2	0	5	5	NA	NA	NA	NA	3500	NA	1.5	2333.33333333333	3	1
1549	145194355008551	10	1	31	3	3	4	1	83023	5	3	1	7	83	9	5	2	21	13	12	2	21	5	5	5	3	1	NA	5	7	5	2	6	5	4	1	NA	1	1	800	NA	NA	NA	NA	NA	1	800	6	3
1550	145194355013675	10	1	45	4	4	5	2	75118	9	5	1	11	75	1	1	1	12	8	7	1	9	3	3	3	3	1	NA	2	2	2	2	11	8	8	1	NA	4	4	NA	NA	NA	2750	NA	NA	1	2750	2	3
1551	145194355246145	10	2	36	4	4	4	4	43040	3	2	1	5	43	8	5	2	3	3	3	6	22	8	7	8	NA	NA	NA	8	8	NA	2	5	4	3	2	0	2	2	NA	1100	NA	NA	NA	NA	1.5	733.333333333333	6	1
1552	145194355332171	10	2	51	5	5	6	4	60157	5	3	1	7	60	4	2	2	19	10	9	1	18	5	5	5	4	2	NA	2	3	3	2	2	2	1	1	NA	2	2	NA	1400	NA	NA	NA	NA	1	1400	4	4
1553	145194355345492	10	1	75	7	6	8	2	38185	8	4	1	11	38	8	5	2	22	3	3	3	23	8	7	7	NA	NA	NA	7	8	NA	2	4	3	2	2	0	7	7	NA	NA	NA	NA	NA	NA	NA	NA	NA	1
1554	145194355348568	10	2	53	5	5	6	4	80021	7	4	1	11	80	4	2	2	19	10	9	1	18	5	5	5	7	2	2	3	5	4	2	8	6	5	2	0	5	5	NA	NA	NA	NA	3800	NA	1.5	2533.33333333333	2	1
1555	145194355359842	10	2	38	4	4	4	4	75118	9	5	1	11	75	1	1	1	12	8	7	1	28	6	6	6	9	1	NA	2	2	2	2	11	8	8	4	2	2	2	NA	1200	NA	NA	NA	NA	2.1	571.428571428571	6	1
1556	145194356070522	10	2	26	3	3	3	3	93078	9	5	4	9	93	1	1	1	12	8	7	1	17	4	4	4	3	1	NA	2	2	2	2	10	7	7	3	0	4	4	NA	NA	NA	2083	NA	NA	2	1041.5	5	2
1557	145194356273253	10	2	19	2	2	2	3	7281	7	4	3	5	7	8	5	2	22	3	3	5	NA	9	8	8	NA	NA	NA	6	8	NA	1	8	1	5	4	0	7	7	NA	NA	NA	NA	NA	NA	NA	NA	NA	4
1558	145194356318213	10	1	37	4	4	4	2	41018	6	3	1	9	41	5	3	2	7	6	6	1	23	6	6	6	3	1	NA	2	2	2	1	6	1	4	2	1	3	3	NA	NA	1600	NA	NA	NA	1.3	1230.76923076923	5	1
1559	145194356427853	10	2	22	2	2	3	3	34270	8	4	2	6	34	9	5	2	13	9	8	1	12	4	4	4	3	1	NA	2	2	2	2	10	7	7	5	0	6	6	NA	NA	NA	NA	NA	7600	3	2533.33333333333	2	2
1560	145194357073012	10	2	56	5	5	6	4	1285	8	4	2	2	1	8	5	2	22	3	3	1	12	4	4	4	5	2	2	3	5	4	2	10	7	7	3	0	6	6	NA	NA	NA	NA	NA	6000	2	3000	2	1
1561	145194357127252	10	2	30	3	3	4	3	35115	5	3	1	8	35	6	3	2	6	5	5	1	15	4	4	4	3	1	NA	2	2	2	2	11	8	8	3	0	7	7	NA	NA	NA	NA	NA	NA	NA	NA	NA	4
1562	145194357127255	10	2	65	6	6	7	4	68004	3	2	1	5	68	3	2	2	1	1	1	3	14	7	7	7	NA	NA	NA	7	8	NA	2	7	5	4	1	NA	2	2	NA	1400	NA	NA	NA	NA	1	1400	4	3
1563	145194357141612	10	1	60	5	5	7	2	6123	8	4	3	8	6	9	5	2	21	13	12	2	25	6	6	6	1	3	NA	5	7	5	2	8	6	5	1	NA	1	1	270	NA	NA	NA	NA	NA	1	270	6	3
1564	145194357146647	10	1	18	2	2	2	1	59220	8	4	3	7	59	2	2	2	17	10	9	5	NA	9	8	8	NA	NA	NA	6	8	NA	1	8	1	5	4	0	4	4	NA	NA	NA	2650	NA	NA	2.5	1060	5	4
1565	145199160661014	10	2	43	4	4	5	4	6088	8	4	1	11	6	9	5	2	21	13	12	1	21	5	5	5	9	1	NA	2	2	2	2	8	6	5	3	0	6	6	NA	NA	NA	NA	NA	4500	2	2250	3	1
1566	145199160667159	10	2	78	7	6	8	4	63300	5	3	1	7	63	8	5	2	3	3	3	3	9	7	7	7	NA	NA	NA	7	8	NA	2	11	8	8	1	NA	6	6	NA	NA	NA	NA	NA	4800	1	4800	1	3
1567	145199160672283	10	2	70	6	6	8	4	73100	4	2	1	2	73	8	5	2	22	3	3	3	7	7	7	7	NA	NA	NA	7	8	NA	2	11	8	8	2	0	5	5	NA	NA	NA	NA	3589	NA	1.5	2392.66666666667	3	1
1568	145199160685607	10	2	64	5	5	7	4	31506	8	4	2	7	31	7	4	2	16	9	8	1	7	3	3	3	5	2	2	3	5	4	1	11	1	8	5	0	6	6	NA	NA	NA	NA	NA	4600	3	1533.33333333333	4	1
1569	145199160686632	10	1	69	6	6	7	2	95574	9	5	2	5	95	1	1	1	12	8	7	3	10	7	7	7	NA	NA	NA	7	8	NA	1	11	1	8	2	0	6	6	NA	NA	NA	NA	NA	10000	1.5	6666.66666666667	1	1
1570	145199160695853	10	2	55	5	5	6	4	28220	6	3	3	5	28	5	3	2	7	6	6	1	12	4	4	4	7	2	2	3	5	4	2	10	7	7	2	0	6	6	NA	NA	NA	NA	NA	4800	1.5	3200	1	1
1571	145199160702000	10	1	56	5	5	6	2	57227	6	3	1	8	57	3	2	2	15	1	1	1	23	6	6	6	3	1	NA	2	2	2	2	6	5	4	2	0	5	5	NA	NA	NA	NA	3300	NA	1.5	2200	3	1
1572	145199160707129	10	2	29	3	3	3	3	2239	1	1	6	2	2	4	2	2	19	10	9	1	29	6	6	6	3	1	NA	2	2	2	2	10	7	7	1	NA	3	3	NA	NA	1550	NA	NA	NA	1	1550	4	3
1573	145199160754263	10	1	26	3	3	3	1	26347	5	3	1	5	26	8	5	2	22	3	3	1	23	6	6	6	9	1	NA	2	2	2	2	4	3	2	2	0	1	1	100	NA	NA	NA	NA	NA	1.5	66.6666666666667	6	1
1574	145199161117787	10	1	53	5	5	6	2	1133	1	1	6	1	1	8	5	2	22	3	3	1	20	5	5	5	3	1	NA	2	2	2	2	8	6	5	1	NA	3	3	NA	NA	1904	NA	NA	NA	1	1904	3	2
1575	145199161129057	10	2	68	6	6	7	4	14118	7	4	1	11	14	5	3	2	4	11	10	3	12	7	7	7	NA	NA	NA	7	8	NA	2	10	7	7	2	0	3	3	NA	NA	1880	NA	NA	NA	1.5	1253.33333333333	5	1
1576	145199161150568	10	1	79	7	6	8	2	52121	5	3	1	8	52	4	2	2	8	1	1	3	14	7	7	7	NA	NA	NA	7	8	NA	2	10	7	7	2	0	7	7	NA	NA	NA	NA	NA	NA	NA	NA	NA	1
1577	145199161165856	10	2	66	6	6	7	4	31066	2	2	5	4	31	7	4	2	16	9	8	3	5	7	7	7	NA	NA	NA	7	8	NA	2	11	8	8	4	1	6	6	NA	NA	NA	NA	NA	4500	2.3	1956.52173913043	3	3
1578	145199161195558	10	2	35	4	4	4	4	21316	1	1	6	1	21	4	2	2	5	4	4	1	20	5	5	5	3	1	NA	2	2	2	2	11	8	8	3	1	6	6	NA	NA	NA	NA	NA	5000	1.8	2777.77777777778	2	1
1579	145199161218092	10	2	27	3	3	3	3	69383	8	4	1	11	69	8	5	2	22	3	3	1	10	3	3	3	3	1	NA	2	2	2	2	11	8	8	3	0	6	6	NA	NA	NA	NA	NA	8000	2	4000	1	3
1580	145199161230381	10	2	35	4	4	4	4	18242	2	2	5	3	18	5	3	2	7	6	6	1	5	3	3	3	1	3	NA	1	1	1	2	10	7	7	5	3	5	5	NA	NA	NA	NA	3500	NA	2.4	1458.33333333333	4	2
1581	145199161230383	10	2	36	4	4	4	4	63164	8	4	3	7	63	8	5	2	3	3	3	1	21	5	5	5	3	1	NA	2	2	2	2	7	5	4	2	0	7	7	NA	NA	NA	NA	NA	NA	NA	NA	NA	1
1582	145199161282632	10	1	80	7	6	8	2	30261	1	1	6	1	30	9	5	2	13	9	8	3	1	7	7	7	NA	NA	NA	7	8	NA	2	4	3	2	2	0	4	4	NA	NA	NA	2500	NA	NA	1.5	1666.66666666667	4	1
1583	145199161312360	10	2	67	6	6	7	4	93070	9	5	4	9	93	1	1	1	12	8	7	3	14	7	7	7	NA	NA	NA	7	8	NA	2	11	8	8	3	0	7	7	NA	NA	NA	NA	NA	NA	NA	NA	NA	1
1584	145199161424940	10	2	41	4	4	5	4	42228	3	2	3	2	42	8	5	2	22	3	3	1	27	6	6	6	3	1	NA	2	2	2	2	9	6	6	3	1	4	4	NA	NA	NA	2700	NA	NA	1.8	1500	4	1
1585	145199161538575	10	2	22	2	2	3	3	34172	8	4	1	11	34	9	5	2	13	9	8	5	NA	9	8	8	NA	NA	NA	6	8	NA	1	8	1	5	2	0	2	2	NA	1450	NA	NA	NA	NA	1.5	966.666666666667	5	1
1586	145199161744420	10	2	38	4	4	4	4	30134	1	1	6	1	30	9	5	2	13	9	8	1	5	3	3	3	3	1	NA	2	2	2	2	10	7	7	4	2	4	4	NA	NA	NA	2450	NA	NA	2.1	1166.66666666667	5	1
1587	145199161744425	10	1	26	3	3	3	1	41217	3	2	3	1	41	5	3	2	7	6	6	1	25	6	6	6	3	1	NA	2	2	2	2	6	5	4	1	NA	2	2	NA	1240	NA	NA	NA	NA	1	1240	5	2
1588	145199161750575	10	1	74	6	6	8	2	84053	1	1	6	2	84	9	5	2	21	13	12	3	6	7	7	7	NA	NA	NA	7	8	NA	2	11	8	8	1	NA	5	5	NA	NA	NA	NA	3900	NA	1	3900	1	3
1589	145199161797700	10	1	61	5	5	7	2	54273	4	2	1	5	54	3	2	2	15	1	1	1	23	6	6	6	3	1	NA	2	2	2	2	11	8	8	1	NA	4	4	NA	NA	NA	2300	NA	NA	1	2300	3	3
1590	145199161818200	10	1	55	5	5	6	2	38162	4	2	3	2	38	8	5	2	22	3	3	1	23	6	6	6	3	1	NA	2	2	2	2	6	5	4	2	0	5	5	NA	NA	NA	NA	3200	NA	1.5	2133.33333333333	3	1
1591	145199161861221	10	2	55	5	5	6	4	86054	1	1	6	1	86	6	3	2	20	2	2	2	12	4	4	4	7	2	3	5	7	5	2	8	6	5	4	1	2	2	NA	1070	NA	NA	NA	NA	2.3	465.217391304348	6	1
1592	145199161904255	10	1	30	3	3	4	1	67090	1	1	6	1	67	3	2	2	1	1	1	1	24	6	6	6	3	1	NA	2	2	2	2	6	5	4	2	0	4	4	NA	NA	NA	2800	NA	NA	1.5	1866.66666666667	3	1
1593	145199161913354	10	2	28	3	3	3	3	13063	8	4	4	8	13	9	5	2	21	13	12	1	7	3	3	3	5	2	2	3	5	4	2	11	8	8	2	0	5	5	NA	NA	NA	NA	3500	NA	1.5	2333.33333333333	3	1
1594	145199162072179	10	2	36	4	4	4	4	93063	9	5	4	8	93	1	1	1	12	8	7	1	12	4	4	4	3	1	NA	2	2	2	2	10	7	7	4	2	6	6	NA	NA	NA	NA	NA	4500	2.1	2142.85714285714	3	1
1595	145199162220552	10	1	76	7	6	8	2	82033	5	3	1	7	82	7	4	2	16	9	8	3	7	7	7	7	NA	NA	NA	7	8	NA	2	10	7	7	2	0	6	6	NA	NA	NA	NA	NA	4060	1.5	2706.66666666667	2	1
1596	145199162235941	10	1	59	5	5	6	2	71105	5	3	3	5	71	4	2	2	5	4	4	2	9	3	3	3	3	1	NA	5	7	5	2	8	6	5	3	0	4	4	NA	NA	NA	2400	NA	NA	2	1200	5	1
1597	145199162242131	10	1	72	6	6	8	2	45234	8	4	1	11	45	5	3	2	7	6	6	3	9	7	7	7	NA	NA	NA	7	8	NA	2	11	8	8	1	NA	6	6	NA	NA	NA	NA	NA	4500	1	4500	1	3
1598	145199162248281	10	2	77	7	6	8	4	60681	1	1	6	1	60	4	2	2	19	10	9	3	11	7	7	7	NA	NA	NA	7	8	NA	2	11	8	8	2	0	4	4	NA	NA	NA	2200	NA	NA	1.5	1466.66666666667	4	3
1599	145199162248285	10	2	33	3	3	4	3	45246	1	1	6	1	45	5	3	2	7	6	6	6	3	7	7	8	NA	NA	NA	8	8	NA	2	9	6	6	3	2	2	2	NA	1400	NA	NA	NA	NA	1.6	875	6	3
1600	145199162251360	10	1	60	5	5	7	2	69286	8	4	4	8	69	8	5	2	22	3	3	3	23	8	7	7	NA	NA	NA	7	8	NA	2	6	5	4	3	0	7	7	NA	NA	NA	NA	NA	NA	NA	NA	NA	1
1601	145199162287212	10	2	19	2	2	2	3	6004	8	4	3	10	6	9	5	2	21	13	12	5	NA	9	8	8	NA	NA	NA	6	8	NA	1	8	1	5	2	0	7	7	NA	NA	NA	NA	NA	NA	NA	NA	NA	2
1602	145199162727499	10	2	67	6	6	7	4	50218	5	3	1	7	50	5	3	2	4	11	10	3	6	7	7	7	NA	NA	NA	7	8	NA	2	10	7	7	2	0	7	7	NA	NA	NA	NA	NA	NA	NA	NA	NA	1
1603	145199162728542	10	2	75	7	6	8	4	13215	8	4	1	11	13	9	5	2	21	13	12	3	15	7	7	7	NA	NA	NA	7	8	NA	2	10	7	7	1	NA	3	3	NA	NA	1800	NA	NA	NA	1	1800	4	4
1604	145199162730612	10	2	34	3	3	4	3	1431	1	1	6	2	1	8	5	2	22	3	3	6	21	8	7	8	NA	NA	NA	8	8	NA	2	10	7	7	4	2	3	3	NA	NA	1850	NA	NA	NA	2.1	880.952380952381	6	1
1605	145199162735622	10	1	52	5	5	6	2	77349	3	2	5	5	77	1	1	1	12	8	7	1	16	4	4	4	3	1	NA	2	2	2	2	10	7	7	3	0	7	7	NA	NA	NA	NA	NA	NA	NA	NA	NA	1
1606	145199162759190	10	2	37	4	4	4	4	13059	2	2	5	4	13	9	5	2	21	13	12	1	20	5	5	5	4	2	NA	2	3	3	2	11	8	8	5	3	7	7	NA	NA	NA	NA	NA	NA	NA	NA	NA	1
1607	145199162764311	10	1	73	6	6	8	2	91378	1	1	6	1	91	1	1	1	12	8	7	3	10	7	7	7	NA	NA	NA	7	8	NA	2	11	8	8	2	0	5	5	NA	NA	NA	NA	3800	NA	1.5	2533.33333333333	2	1
1608	145199162765340	10	2	51	5	5	6	4	33540	1	1	6	3	33	7	4	2	2	2	2	1	10	3	3	3	3	1	NA	2	2	2	2	10	7	7	2	0	6	6	NA	NA	NA	NA	NA	4000	1.5	2666.66666666667	2	1
1609	145199162769440	10	1	53	5	5	6	2	40087	1	1	6	1	40	7	4	2	2	2	2	7	28	8	7	8	NA	NA	NA	8	8	NA	2	7	5	4	3	0	2	2	NA	1200	NA	NA	NA	NA	2	600	6	1
1610	145199162825789	10	2	34	3	3	4	3	54076	3	2	1	4	54	3	2	2	15	1	1	1	23	6	6	6	3	1	NA	2	2	2	2	5	4	3	4	2	3	3	NA	NA	1650	NA	NA	NA	2.1	785.714285714286	6	1
1611	145199162847309	10	2	75	7	6	8	4	69027	8	4	2	7	69	8	5	2	22	3	3	3	20	8	7	7	NA	NA	NA	7	8	NA	2	5	4	3	2	0	4	4	NA	NA	NA	2300	NA	NA	1.5	1533.33333333333	4	1
1612	145199162848337	10	2	30	3	3	4	3	92073	9	5	2	9	92	1	1	1	12	8	7	6	21	8	7	8	NA	NA	NA	8	8	NA	2	11	8	8	3	1	4	4	NA	NA	NA	2500	NA	NA	1.8	1388.88888888889	4	1
1613	145199163138159	10	2	41	4	4	5	4	54159	5	3	1	6	54	3	2	2	15	1	1	1	16	4	4	4	7	2	3	3	4	4	2	10	7	7	4	2	5	5	NA	NA	NA	NA	3100	NA	2.1	1476.19047619048	4	1
1614	145199163174956	10	2	36	4	4	4	4	68376	8	4	3	7	68	3	2	2	1	1	1	2	21	5	5	5	3	1	NA	5	7	5	2	3	2	1	2	0	7	7	NA	NA	NA	NA	NA	NA	NA	NA	NA	3
1615	145199163199549	10	1	65	6	6	7	2	47325	1	1	6	1	47	7	4	2	2	2	2	3	15	7	7	7	NA	NA	NA	7	8	NA	2	5	4	3	1	NA	3	3	NA	NA	1895	NA	NA	NA	1	1895	3	4
1616	145199163223115	10	2	47	4	4	5	4	30321	3	2	1	4	30	9	5	2	13	9	8	2	22	5	5	5	3	1	NA	5	7	5	2	7	5	4	1	NA	2	2	NA	1300	NA	NA	NA	NA	1	1300	5	4
1617	145199163589726	10	1	32	3	3	4	1	59449	4	2	1	5	59	2	2	2	17	10	9	1	26	6	6	6	3	1	NA	2	2	2	2	9	6	6	1	NA	2	2	NA	1499	NA	NA	NA	NA	1	1499	4	4
1618	145199163714624	10	2	18	2	2	2	3	69388	8	4	1	11	69	8	5	2	22	3	3	5	NA	9	8	8	NA	NA	NA	6	8	NA	1	8	1	5	6	2	4	4	NA	NA	NA	2500	NA	NA	3.1	806.451612903226	6	2
1619	145199163715670	10	1	33	3	3	4	1	24194	6	3	4	2	24	7	4	2	2	2	2	1	23	6	6	6	3	1	NA	2	2	2	2	7	5	4	4	0	2	2	NA	1280	NA	NA	NA	NA	2.5	512	6	1
1620	145199163715671	10	1	21	2	2	3	1	77284	6	3	1	10	77	1	1	1	12	8	7	5	NA	9	8	8	NA	NA	NA	6	8	NA	1	6	1	4	5	1	2	2	NA	1350	NA	NA	NA	NA	2.8	482.142857142857	6	4
1621	145199163715672	10	1	32	3	3	4	1	84138	3	2	5	6	84	9	5	2	21	13	12	1	28	6	6	6	3	1	NA	2	2	2	2	7	5	4	3	1	5	5	NA	NA	NA	NA	3500	NA	1.8	1944.44444444444	3	1
1622	145199163721822	10	2	47	4	4	5	4	50401	1	1	6	1	50	5	3	2	4	11	10	1	11	4	4	4	5	2	2	3	5	4	1	11	1	8	3	1	4	4	NA	NA	NA	2600	NA	NA	1.8	1444.44444444444	4	1
1623	145199163721823	10	1	52	5	5	6	2	71022	2	2	3	1	71	4	2	2	5	4	4	1	23	6	6	6	6	2	2	3	5	4	1	8	1	5	3	1	2	2	NA	1400	NA	NA	NA	NA	1.8	777.777777777778	6	1
1624	145199163788405	10	1	77	7	6	8	2	92012	9	5	2	11	92	1	1	1	12	8	7	3	9	7	7	7	NA	NA	NA	7	8	NA	2	11	8	8	1	NA	3	3	NA	NA	1850	NA	NA	NA	1	1850	4	3
1625	145199163823121	10	1	20	2	2	3	1	75112	9	5	1	11	75	1	1	1	12	8	7	5	NA	9	8	8	NA	NA	NA	6	8	NA	1	8	1	5	2	0	7	7	NA	NA	NA	NA	NA	NA	NA	NA	NA	2
1626	145199163838491	10	1	35	4	4	4	2	50543	1	1	6	2	50	5	3	2	4	11	10	1	23	6	6	6	3	1	NA	2	2	2	2	11	8	8	4	2	6	6	NA	NA	NA	NA	NA	4001	2.1	1905.2380952381	3	1
1627	145199164205122	10	2	21	2	2	3	3	69029	8	4	4	9	69	8	5	2	22	3	3	5	NA	9	8	8	NA	NA	NA	6	8	NA	1	8	1	5	7	2	4	4	NA	NA	NA	2700	NA	NA	3.6	750	6	2
1628	145199164232704	10	2	47	4	4	5	4	29215	2	2	5	3	29	6	3	2	6	5	5	1	12	4	4	4	1	3	NA	1	1	1	2	10	7	7	1	NA	3	3	NA	NA	1999	NA	NA	NA	1	1999	3	3
1629	145199164245000	10	2	62	5	5	7	4	7171	1	1	6	1	7	8	5	2	22	3	3	2	7	3	3	3	3	1	NA	5	7	5	2	10	7	7	1	NA	1	1	850	NA	NA	NA	NA	NA	1	850	6	4
1630	145199164306472	10	2	59	5	5	6	4	59343	8	4	3	5	59	2	2	2	17	10	9	1	12	4	4	4	3	1	NA	2	2	2	2	11	8	8	1	NA	3	3	NA	NA	1720	NA	NA	NA	1	1720	4	3
1631	145199164718184	10	2	39	4	4	4	4	47185	4	2	1	3	47	7	4	2	2	2	2	1	9	3	3	3	3	1	NA	2	2	2	2	10	7	7	4	2	5	5	NA	NA	NA	NA	3850	NA	2.1	1833.33333333333	4	1
1632	145199164721265	10	2	80	7	6	8	4	92012	9	5	2	11	92	1	1	1	12	8	7	3	9	7	7	7	NA	NA	NA	7	8	NA	2	8	6	5	1	NA	7	7	NA	NA	NA	NA	NA	NA	NA	NA	NA	3
1633	145199164724339	10	1	41	4	4	5	2	92040	9	5	2	10	92	1	1	1	12	8	7	2	25	6	6	6	9	1	NA	5	7	5	2	11	8	8	1	NA	1	1	580	NA	NA	NA	NA	NA	1	580	6	3
1634	145199164724341	10	2	38	4	4	4	4	57591	8	4	4	6	57	3	2	2	15	1	1	1	27	6	6	6	3	1	NA	2	2	2	2	6	5	4	2	1	2	2	NA	1120	NA	NA	NA	NA	1.3	861.538461538462	6	3
1635	145199164740608	10	2	57	5	5	6	4	76667	1	1	6	1	76	5	3	2	11	11	10	1	6	3	3	3	4	2	NA	2	3	3	2	10	7	7	3	0	4	4	NA	NA	NA	2400	NA	NA	2	1200	5	1
1636	145199164744711	10	1	63	5	5	7	2	56097	2	2	5	4	56	6	3	2	6	5	5	3	17	7	7	7	NA	NA	NA	7	8	NA	2	5	4	3	2	0	4	4	NA	NA	NA	2400	NA	NA	1.5	1600	4	1
1637	145199164749833	10	1	32	3	3	4	1	68066	6	3	1	10	68	3	2	2	1	1	1	1	7	3	3	3	5	2	2	3	5	4	2	11	8	8	4	2	5	5	NA	NA	NA	NA	3600	NA	2.1	1714.28571428571	4	1
1638	145199164749834	10	1	61	5	5	7	2	53137	1	1	6	3	53	6	3	2	18	12	11	1	25	6	6	6	3	1	NA	2	2	2	2	5	4	3	3	0	6	6	NA	NA	NA	NA	NA	5500	2	2750	2	1
1639	145199164755990	10	2	28	3	3	3	3	49058	1	1	6	1	49	6	3	2	18	12	11	4	NA	10	8	8	NA	NA	NA	5	8	5	2	4	3	2	1	NA	4	4	NA	NA	NA	2050	NA	NA	1	2050	3	3
1640	145199164803141	10	2	65	6	6	7	4	94003	9	5	3	8	94	1	1	1	12	8	7	3	2	7	7	7	NA	NA	NA	7	8	NA	2	7	5	4	2	0	3	3	NA	NA	1999	NA	NA	NA	1.5	1332.66666666667	4	1
1641	145199165134921	10	1	53	5	5	6	2	95268	9	5	4	9	95	1	1	1	12	8	7	1	26	6	6	6	3	1	NA	2	2	2	2	6	5	4	2	0	4	4	NA	NA	NA	2850	NA	NA	1.5	1900	3	2
1642	145199165148278	10	1	18	2	2	2	1	44066	3	2	5	5	44	6	3	2	18	12	11	5	NA	9	8	8	NA	NA	NA	6	8	NA	1	8	1	5	4	2	5	5	NA	NA	NA	NA	3699	NA	2.1	1761.42857142857	4	2
1643	145199165153286	10	1	63	5	5	7	2	56260	6	3	1	10	56	6	3	2	6	5	5	1	9	3	3	3	3	1	NA	2	2	2	2	11	8	8	1	NA	6	6	NA	NA	NA	NA	NA	6000	1	6000	1	3
1644	145199165153288	10	1	75	7	6	8	2	66136	8	4	1	11	66	9	5	2	13	9	8	3	6	7	7	7	NA	NA	NA	7	8	NA	2	11	8	8	2	0	6	6	NA	NA	NA	NA	NA	4200	1.5	2800	2	1
1645	145199165156362	10	1	44	4	4	5	2	59367	8	4	4	7	59	2	2	2	17	10	9	1	16	4	4	4	3	1	NA	2	2	2	2	10	7	7	4	1	5	5	NA	NA	NA	NA	3500	NA	2.3	1521.73913043478	4	1
1646	145199165179930	10	2	72	6	6	8	4	67482	8	4	1	11	67	3	2	2	1	1	1	3	9	7	7	7	NA	NA	NA	7	8	NA	2	10	7	7	1	NA	2	2	NA	1450	NA	NA	NA	NA	1	1450	4	3
1647	145199165184029	10	1	42	4	4	5	2	87079	1	1	6	1	87	7	4	2	14	2	2	1	18	5	5	5	4	2	NA	2	3	3	2	11	8	8	4	2	3	3	NA	NA	1900	NA	NA	NA	2.1	904.761904761905	5	1
1648	145199165189151	10	1	48	4	4	5	2	27492	1	1	6	1	27	5	3	2	11	11	10	7	25	8	7	8	NA	NA	NA	8	8	NA	2	6	5	4	3	1	3	3	NA	NA	1900	NA	NA	NA	1.8	1055.55555555556	5	1
1649	145199165196326	10	2	48	4	4	5	4	76462	3	2	1	4	76	5	3	2	11	11	10	1	2	2	2	2	1	3	NA	1	1	1	2	9	6	6	2	0	1	1	280	NA	NA	NA	NA	NA	1.5	186.666666666667	6	2
1650	145199165578338	10	2	19	2	2	2	3	84082	1	1	6	2	84	9	5	2	21	13	12	5	NA	9	8	8	NA	NA	NA	6	8	NA	1	8	1	5	1	NA	1	1	600	NA	NA	NA	NA	NA	1	600	6	2
1651	145199165582440	10	2	22	2	2	3	3	80021	7	4	1	11	80	4	2	2	19	10	9	5	NA	9	8	8	NA	NA	NA	6	8	NA	1	10	1	7	1	NA	1	1	700	NA	NA	NA	NA	NA	1	700	6	2
1652	145199165587471	10	1	29	3	3	3	1	31555	8	4	1	11	31	7	4	2	16	9	8	1	12	4	4	4	7	2	3	3	4	4	2	11	8	8	2	0	7	7	NA	NA	NA	NA	NA	NA	NA	NA	NA	1
1653	145199165596698	10	2	75	7	6	8	4	91115	9	5	2	3	91	1	1	1	12	8	7	3	9	7	7	7	NA	NA	NA	7	8	NA	2	10	7	7	2	0	7	7	NA	NA	NA	NA	NA	NA	NA	NA	NA	1
1654	145199165596699	10	1	74	6	6	8	2	27107	1	1	6	2	27	5	3	2	11	11	10	3	3	7	7	7	NA	NA	NA	7	8	NA	2	6	5	4	2	0	3	3	NA	NA	1800	NA	NA	NA	1.5	1200	5	1
1655	145199165597724	10	2	56	5	5	6	4	93051	9	5	3	10	93	1	1	1	12	8	7	1	20	5	5	5	4	2	NA	2	3	3	2	8	6	5	2	0	3	3	NA	NA	1980	NA	NA	NA	1.5	1320	4	4
1656	145199165615149	10	2	35	4	4	4	4	31395	8	4	3	8	31	7	4	2	16	9	8	1	20	5	5	5	3	1	NA	2	2	2	2	10	7	7	3	1	2	2	NA	1350	NA	NA	NA	NA	1.8	750	6	1
1657	145199165645875	10	1	67	6	6	7	2	82121	6	3	1	10	82	7	4	2	16	9	8	3	6	7	7	7	NA	NA	NA	7	8	NA	2	11	8	8	2	0	5	5	NA	NA	NA	NA	3999	NA	1.5	2666	2	1
1658	145199165650999	10	2	85	7	6	8	4	42187	6	3	1	9	42	8	5	2	22	3	3	3	6	7	7	7	NA	NA	NA	7	8	NA	2	11	8	8	1	NA	6	6	NA	NA	NA	NA	NA	4500	1	4500	1	3
1659	145199165664315	10	2	78	7	6	8	4	61483	2	2	1	3	61	5	3	2	4	11	10	1	3	2	2	2	10	5	NA	4	6	NA	2	8	6	5	2	0	4	4	NA	NA	NA	2750	NA	NA	1.5	1833.33333333333	4	1
1660	145199165697111	10	2	75	7	6	8	4	2408	5	3	1	8	2	4	2	2	19	10	9	3	4	7	7	7	NA	NA	NA	7	8	NA	2	10	7	7	2	0	5	5	NA	NA	NA	NA	3800	NA	1.5	2533.33333333333	2	1
1661	145199165703261	10	2	69	6	6	7	4	23183	1	1	6	1	23	7	4	2	14	2	2	3	12	7	7	7	NA	NA	NA	7	8	NA	2	10	7	7	1	NA	3	3	NA	NA	1955	NA	NA	NA	1	1955	3	3
1662	145199165713515	10	1	55	5	5	6	2	1202	3	2	1	5	1	8	5	2	22	3	3	1	23	6	6	6	3	1	NA	2	2	2	2	6	5	4	1	NA	4	4	NA	NA	NA	2300	NA	NA	1	2300	3	3
1663	145199165727868	10	1	76	7	6	8	2	16199	7	4	3	3	16	6	3	2	20	2	2	3	9	7	7	7	NA	NA	NA	7	8	NA	2	11	8	8	1	NA	7	7	NA	NA	NA	NA	NA	NA	NA	NA	NA	3
1664	145199165775899	10	1	63	5	5	7	2	14349	1	1	6	2	14	5	3	2	4	11	10	3	9	7	7	7	NA	NA	NA	7	8	NA	2	11	8	8	2	0	6	6	NA	NA	NA	NA	NA	4500	1.5	3000	2	1
1665	145199165838414	10	2	71	6	6	8	4	35288	5	3	5	9	35	6	3	2	6	5	5	3	15	7	7	7	NA	NA	NA	7	8	NA	2	10	7	7	1	NA	4	4	NA	NA	NA	2000	NA	NA	1	2000	3	3
1666	145199166062615	10	1	39	4	4	4	2	7186	4	2	1	5	7	8	5	2	22	3	3	1	21	5	5	5	3	1	NA	2	2	2	2	10	7	7	4	2	3	3	NA	NA	1800	NA	NA	NA	2.1	857.142857142857	6	2
1667	145199166083147	10	1	52	5	5	6	2	92026	9	5	2	10	92	1	1	1	12	8	7	1	9	3	3	3	3	1	NA	2	2	2	1	11	1	8	4	0	5	5	NA	NA	NA	NA	3800	NA	2.5	1520	4	1
1668	145199166108760	10	1	75	7	6	8	2	38185	8	4	1	11	38	8	5	2	22	3	3	3	11	7	7	7	NA	NA	NA	7	8	NA	2	10	7	7	2	0	4	4	NA	NA	NA	2800	NA	NA	1.5	1866.66666666667	3	1
1669	145199166124128	10	1	48	4	4	5	2	75117	9	5	1	11	75	1	1	1	12	8	7	1	15	4	4	4	3	1	NA	2	2	2	2	11	8	8	2	1	5	5	NA	NA	NA	NA	3800	NA	1.3	2923.07692307692	2	1
1670	145199166127208	10	1	28	3	3	3	1	51454	8	4	1	11	51	4	2	2	8	1	1	1	20	5	5	5	3	1	NA	2	2	2	2	11	8	8	1	NA	3	3	NA	NA	1900	NA	NA	NA	1	1900	3	4
1671	145199166127211	10	1	29	3	3	3	1	73162	5	3	3	1	73	8	5	2	22	3	3	1	24	6	6	6	4	2	NA	2	3	3	2	6	5	4	1	NA	2	2	NA	1200	NA	NA	NA	NA	1	1200	5	3
1672	145199166194698	10	2	27	3	3	3	3	65092	1	1	6	1	65	7	4	2	16	9	8	1	20	5	5	5	3	1	NA	2	2	2	1	10	1	7	3	1	3	3	NA	NA	1850	NA	NA	NA	1.8	1027.77777777778	5	1
1673	145199166245936	10	1	32	3	3	4	1	83137	8	4	1	11	83	9	5	2	21	13	12	1	19	5	5	5	5	2	2	3	5	4	2	10	7	7	2	0	4	4	NA	NA	NA	2800	NA	NA	1.5	1866.66666666667	3	1
1674	145199166316634	10	1	47	4	4	5	2	38194	2	2	5	3	38	8	5	2	22	3	3	1	15	4	4	4	3	1	NA	2	2	2	2	10	7	7	1	NA	3	3	NA	NA	1800	NA	NA	NA	1	1800	4	4
1675	145199166569596	10	2	28	3	3	3	3	74264	6	3	3	5	74	8	5	2	22	3	3	1	20	5	5	5	9	1	NA	2	2	2	2	10	7	7	4	2	4	4	NA	NA	NA	2000	NA	NA	2.1	952.380952380952	5	3
1676	145199166637128	10	1	73	6	6	8	2	44109	8	4	1	11	44	6	3	2	18	12	11	3	9	7	7	7	NA	NA	NA	7	8	NA	2	11	8	8	1	NA	4	4	NA	NA	NA	2100	NA	NA	1	2100	3	3
1677	145199166642253	10	1	66	6	6	7	2	48139	1	1	6	1	48	9	5	2	13	9	8	3	4	7	7	7	NA	NA	NA	7	8	NA	2	11	8	8	2	0	5	5	NA	NA	NA	NA	3900	NA	1.5	2600	2	2
1678	145199166642254	10	2	68	6	6	7	4	92049	9	5	2	9	92	1	1	1	12	8	7	3	7	7	7	7	NA	NA	NA	7	8	NA	2	11	8	8	2	0	6	6	NA	NA	NA	NA	NA	5000	1.5	3333.33333333333	1	1
1679	145199166642255	10	1	67	6	6	7	2	44025	1	1	6	4	44	6	3	2	18	12	11	3	7	7	7	7	NA	NA	NA	7	8	NA	2	11	8	8	2	0	4	4	NA	NA	NA	2600	NA	NA	1.5	1733.33333333333	4	1
1680	145199166648404	10	1	62	5	5	7	2	24294	4	2	1	5	24	7	4	2	2	2	2	1	6	3	3	3	4	2	NA	2	3	3	2	8	6	5	2	0	5	5	NA	NA	NA	NA	3300	NA	1.5	2200	3	1
1681	145199166692450	10	2	58	5	5	6	4	30086	1	1	6	1	30	9	5	2	13	9	8	1	1	1	1	1	1	3	NA	1	1	1	2	10	7	7	4	0	5	5	NA	NA	NA	NA	3900	NA	2.5	1560	4	1
1682	145199166697571	10	1	33	3	3	4	1	79174	3	2	1	5	79	6	3	2	20	2	2	1	27	6	6	6	3	1	NA	2	2	2	2	3	2	1	2	1	2	2	NA	1100	NA	NA	NA	NA	1.3	846.153846153846	6	1
1683	145199166697572	10	2	50	5	5	6	4	18211	1	1	6	1	18	5	3	2	7	6	6	1	20	5	5	5	5	2	2	3	5	4	2	7	5	4	3	0	7	7	NA	NA	NA	NA	NA	NA	NA	NA	NA	2
1684	145199166742648	10	1	59	5	5	6	2	24291	2	2	5	3	24	7	4	2	2	2	2	1	25	6	6	6	3	1	NA	2	2	2	2	10	7	7	3	0	4	4	NA	NA	NA	2400	NA	NA	2	1200	5	1
1685	145199166759938	10	1	76	7	6	8	2	26220	3	2	5	5	26	8	5	2	22	3	3	3	15	7	7	7	NA	NA	NA	7	8	NA	2	10	7	7	1	NA	2	2	NA	1300	NA	NA	NA	NA	1	1300	5	3
1686	145199166917634	10	1	29	3	3	3	1	21231	8	4	1	11	21	4	2	2	5	4	4	5	NA	9	8	8	NA	NA	NA	6	8	NA	1	11	1	8	1	NA	2	2	NA	1200	NA	NA	NA	NA	1	1200	5	3
1687	145199167175779	10	2	67	6	6	7	4	72181	8	4	1	11	72	6	3	2	18	12	11	3	6	7	7	7	NA	NA	NA	7	8	NA	2	10	7	7	2	0	4	4	NA	NA	NA	2900	NA	NA	1.5	1933.33333333333	3	1
1688	145199167219818	10	2	38	4	4	4	4	44131	4	2	1	7	44	6	3	2	18	12	11	1	5	3	3	3	1	3	NA	1	1	1	2	11	8	8	3	1	4	4	NA	NA	NA	2500	NA	NA	1.8	1388.88888888889	4	1
1689	145199167226989	10	2	55	5	5	6	4	54257	8	4	2	5	54	3	2	2	15	1	1	1	12	4	4	4	3	1	NA	2	2	2	2	11	8	8	4	0	5	5	NA	NA	NA	NA	3900	NA	2.5	1560	4	1
1690	145199167233143	10	1	49	4	4	5	2	60159	6	3	1	9	60	4	2	2	19	10	9	2	24	6	6	6	3	1	NA	5	7	5	2	6	5	4	3	1	7	7	NA	NA	NA	NA	NA	NA	NA	NA	NA	1
1691	145199167233144	10	2	29	3	3	3	3	85024	1	1	6	2	85	6	3	2	18	12	11	1	12	4	4	4	3	1	NA	2	2	2	2	10	7	7	2	1	5	5	NA	NA	NA	NA	3050	NA	1.3	2346.15384615385	3	1
1692	145199167254529	10	2	58	5	5	6	4	1053	6	3	1	9	1	8	5	2	22	3	3	1	7	3	3	3	5	2	2	3	5	4	1	11	1	8	1	NA	4	4	NA	NA	NA	2200	NA	NA	1	2200	3	3
1693	145199167264771	10	1	72	6	6	8	2	33219	3	2	1	3	33	7	4	2	2	2	2	3	19	8	7	7	NA	NA	NA	7	8	NA	2	10	7	7	2	0	5	5	NA	NA	NA	NA	3500	NA	1.5	2333.33333333333	3	1
1694	145199167270919	10	2	56	5	5	6	4	82023	1	1	6	1	82	7	4	2	16	9	8	1	12	4	4	4	3	1	NA	2	2	2	2	9	6	6	2	0	5	5	NA	NA	NA	NA	3800	NA	1.5	2533.33333333333	2	1
1695	145199167270922	10	1	41	4	4	5	2	59122	5	3	1	9	59	2	2	2	17	10	9	1	14	4	4	4	5	2	2	3	5	4	2	10	7	7	4	2	7	7	NA	NA	NA	NA	NA	NA	NA	NA	NA	1
1696	145199167275022	10	1	73	6	6	8	2	75111	9	5	1	11	75	1	1	1	12	8	7	3	22	8	7	7	NA	NA	NA	7	8	NA	2	5	4	3	2	0	3	3	NA	NA	1600	NA	NA	NA	1.5	1066.66666666667	5	1
1697	145199167275023	10	1	42	4	4	5	2	95149	4	2	1	3	95	1	1	1	12	8	7	1	12	4	4	4	3	1	NA	2	2	2	2	10	7	7	5	3	4	4	NA	NA	NA	2990	NA	NA	2.4	1245.83333333333	5	1
1698	145199167275027	10	2	50	5	5	6	4	69091	8	4	4	7	69	8	5	2	22	3	3	6	21	8	7	8	NA	NA	NA	8	8	NA	2	7	5	4	3	0	4	4	NA	NA	NA	2500	NA	NA	2	1250	5	1
1699	145199167296542	10	1	29	3	3	3	1	35238	8	4	1	11	35	6	3	2	6	5	5	2	20	5	5	5	3	1	NA	5	7	5	2	11	8	8	1	NA	2	2	NA	1240	NA	NA	NA	NA	1	1240	5	4
1700	145199167311904	10	2	58	5	5	6	4	93066	9	5	4	11	93	1	1	1	12	8	7	1	12	4	4	4	7	2	2	3	5	4	2	10	7	7	3	0	5	5	NA	NA	NA	NA	3980	NA	2	1990	3	1
1701	145199167339566	10	1	49	4	4	5	2	59139	4	2	1	7	59	2	2	2	17	10	9	1	28	6	6	6	3	1	NA	2	2	2	2	5	4	3	2	0	4	4	NA	NA	NA	2500	NA	NA	1.5	1666.66666666667	4	1
1702	145199167382600	10	2	19	2	2	2	3	70550	5	3	1	7	70	3	2	2	10	4	4	5	NA	9	8	8	NA	NA	NA	6	8	NA	1	8	1	5	3	0	7	7	NA	NA	NA	NA	NA	NA	NA	NA	NA	4
1703	145199167739945	10	1	57	5	5	6	2	91691	9	5	2	8	91	1	1	1	12	8	7	1	19	5	5	5	5	2	2	3	5	4	2	8	6	5	1	NA	6	6	NA	NA	NA	NA	NA	4100	1	4100	1	2
1704	145199167739947	10	2	23	2	2	3	3	42207	8	4	4	9	42	8	5	2	22	3	3	5	NA	9	8	8	NA	NA	NA	6	8	NA	1	10	1	7	2	0	1	1	500	NA	NA	NA	NA	NA	1.5	333.333333333333	6	2
1705	145199167757368	10	1	29	3	3	3	1	59036	3	2	1	4	59	2	2	2	17	10	9	1	18	5	5	5	9	1	NA	2	2	2	2	9	6	6	3	0	3	3	NA	NA	1900	NA	NA	NA	2	950	5	4
1706	145199167768644	10	1	43	4	4	5	2	69083	5	3	2	2	69	8	5	2	22	3	3	1	5	3	3	3	1	3	NA	1	1	1	2	10	7	7	3	1	7	7	NA	NA	NA	NA	NA	NA	NA	NA	NA	1
1707	145199167778894	10	1	55	5	5	6	2	25469	1	1	6	1	25	3	2	2	10	4	4	1	14	4	4	4	4	2	NA	2	3	3	2	5	4	3	3	0	6	6	NA	NA	NA	NA	NA	4200	2	2100	3	1
1708	145199167951951	10	2	47	4	4	5	4	33025	1	1	6	1	33	7	4	2	2	2	2	1	9	3	3	3	3	1	NA	2	2	2	2	10	7	7	4	0	6	6	NA	NA	NA	NA	NA	8000	2.5	3200	1	1
1709	145199167983727	10	1	61	5	5	7	2	20037	6	3	7	5	20	9	5	2	9	7	12	1	29	6	6	6	3	1	NA	2	2	2	2	8	6	5	4	0	3	3	NA	NA	1950	NA	NA	NA	2.5	780	6	1
1710	145199168093309	10	1	20	2	2	3	1	33330	8	4	2	3	33	7	4	2	2	2	2	5	NA	9	8	8	NA	NA	NA	6	8	NA	1	10	1	7	4	0	6	6	NA	NA	NA	NA	NA	7000	2.5	2800	2	4
1711	145199168097286	10	1	46	4	4	5	2	49007	8	4	1	11	49	6	3	2	18	12	11	1	20	5	5	5	3	1	NA	2	2	2	2	10	7	7	2	0	5	5	NA	NA	NA	NA	3900	NA	1.5	2600	2	1
1712	145199168118792	10	1	60	5	5	7	2	34172	8	4	1	11	34	9	5	2	13	9	8	1	7	3	3	3	5	2	2	3	5	4	2	11	8	8	2	0	6	6	NA	NA	NA	NA	NA	5000	1.5	3333.33333333333	1	1
1713	145199168118793	10	1	56	5	5	6	2	27090	8	4	3	4	27	5	3	2	11	11	10	1	9	3	3	3	3	1	NA	2	2	2	2	10	7	7	2	0	6	6	NA	NA	NA	NA	NA	5500	1.5	3666.66666666667	1	1
1714	145199168126990	10	1	59	5	5	6	2	74123	3	2	1	5	74	8	5	2	22	3	3	1	23	6	6	6	3	1	NA	2	2	2	2	6	5	4	3	0	5	5	NA	NA	NA	NA	3600	NA	2	1800	4	1
1715	145199168131087	10	1	75	7	6	8	2	78220	3	2	1	5	78	1	1	1	12	8	7	3	9	7	7	7	NA	NA	NA	7	8	NA	2	7	5	4	2	0	5	5	NA	NA	NA	NA	3600	NA	1.5	2400	3	1
1716	145199168133137	10	1	71	6	6	8	2	80021	7	4	1	11	80	4	2	2	19	10	9	3	4	7	7	7	NA	NA	NA	7	8	NA	2	11	8	8	2	0	5	5	NA	NA	NA	NA	3900	NA	1.5	2600	2	1
1717	145199168154652	10	2	61	5	5	7	4	63284	4	2	5	7	63	8	5	2	3	3	3	1	18	5	5	5	5	2	2	3	5	4	2	8	6	5	1	NA	7	7	NA	NA	NA	NA	NA	NA	NA	NA	NA	3
1718	145199168161826	10	2	59	5	5	6	4	43268	3	2	5	5	43	8	5	2	3	3	3	1	23	6	6	6	3	1	NA	2	2	2	2	5	4	3	2	0	5	5	NA	NA	NA	NA	3100	NA	1.5	2066.66666666667	3	1
1719	145199168161828	10	2	68	6	6	7	4	33013	8	4	3	5	33	7	4	2	2	2	2	3	9	7	7	7	NA	NA	NA	7	8	NA	2	8	6	5	2	0	7	7	NA	NA	NA	NA	NA	NA	NA	NA	NA	1
1720	145199168228405	10	1	46	4	4	5	2	72303	1	1	6	1	72	6	3	2	18	12	11	1	24	6	6	6	3	1	NA	2	2	2	2	6	5	4	3	0	5	5	NA	NA	NA	NA	3500	NA	2	1750	4	1
1721	145199168254029	10	1	57	5	5	6	2	94052	9	5	2	9	94	1	1	1	12	8	7	7	16	7	7	8	NA	NA	NA	8	8	NA	2	8	6	5	1	NA	2	2	NA	1045	NA	NA	NA	NA	1	1045	5	3
1722	145199168287863	10	2	34	3	3	4	3	79191	6	3	1	10	79	6	3	2	20	2	2	1	22	5	5	5	3	1	NA	2	2	2	2	11	8	8	1	NA	2	2	NA	1200	NA	NA	NA	NA	1	1200	5	3
1723	145199168517132	10	2	72	6	6	8	4	59350	8	4	1	11	59	2	2	2	17	10	9	3	14	7	7	7	NA	NA	NA	7	8	NA	2	10	7	7	1	NA	4	4	NA	NA	NA	2450	NA	NA	1	2450	3	3
1724	145199168634989	10	2	28	3	3	3	3	51108	6	3	1	9	51	4	2	2	8	1	1	1	23	6	6	6	4	2	NA	2	3	3	2	10	7	7	2	0	4	4	NA	NA	NA	2300	NA	NA	1.5	1533.33333333333	4	1
1725	145199168697395	10	2	67	6	6	7	4	90075	6	3	4	4	90	3	2	2	10	4	4	3	20	8	7	7	NA	NA	NA	7	8	NA	2	7	5	4	2	0	4	4	NA	NA	NA	2100	NA	NA	1.5	1400	4	1
1726	145199168723009	10	2	65	6	6	7	4	44035	8	4	2	7	44	6	3	2	18	12	11	3	22	8	7	7	NA	NA	NA	7	8	NA	2	6	5	4	1	NA	1	1	800	NA	NA	NA	NA	NA	1	800	6	3
1727	145199168750667	10	2	52	5	5	6	4	35238	8	4	1	11	35	6	3	2	6	5	5	1	12	4	4	4	7	2	2	3	5	4	2	10	7	7	2	0	5	5	NA	NA	NA	NA	3900	NA	1.5	2600	2	1
1728	145199168795747	10	1	26	3	3	3	1	67143	1	1	6	1	67	3	2	2	1	1	1	2	28	6	6	6	3	1	NA	5	7	5	2	8	6	5	1	NA	1	1	490	NA	NA	NA	NA	NA	1	490	6	3
1729	145199168816241	10	1	33	3	3	4	1	49307	4	2	5	7	49	6	3	2	18	12	11	1	9	3	3	3	3	1	NA	2	2	2	2	11	8	8	3	1	6	6	NA	NA	NA	NA	NA	4200	1.8	2333.33333333333	3	1
1730	145199169111049	10	1	39	4	4	4	2	44020	8	4	3	7	44	6	3	2	18	12	11	1	12	4	4	4	7	2	2	3	5	4	2	10	7	7	1	NA	4	4	NA	NA	NA	2000	NA	NA	1	2000	3	3
1731	145199169127478	10	1	59	5	5	6	2	67043	8	4	4	7	67	3	2	2	1	1	1	1	6	3	3	3	4	2	NA	2	3	3	2	11	8	8	1	NA	6	6	NA	NA	NA	NA	NA	5000	1	5000	1	4
1732	145199169148995	10	2	44	4	4	5	4	13206	8	4	1	11	13	9	5	2	21	13	12	1	14	4	4	4	5	2	2	3	5	4	2	11	8	8	3	1	5	5	NA	NA	NA	NA	3900	NA	1.8	2166.66666666667	3	1
1733	145199169152068	10	1	76	7	6	8	2	69091	8	4	4	7	69	8	5	2	22	3	3	3	9	7	7	7	NA	NA	NA	7	8	NA	2	11	8	8	2	0	7	7	NA	NA	NA	NA	NA	NA	NA	NA	NA	1
1734	145199169152069	10	2	31	3	3	4	3	13117	8	4	4	9	13	9	5	2	21	13	12	1	15	4	4	4	3	1	NA	2	2	2	2	11	8	8	3	1	3	3	NA	NA	1960	NA	NA	NA	1.8	1088.88888888889	5	1
1735	145199169196117	10	1	73	6	6	8	2	26362	7	4	1	10	26	8	5	2	22	3	3	3	6	7	7	7	NA	NA	NA	7	8	NA	2	11	8	8	2	0	6	6	NA	NA	NA	NA	NA	4200	1.5	2800	2	1
1736	145199169201244	10	2	45	4	4	5	4	72042	1	1	6	3	72	6	3	2	18	12	11	1	1	1	1	1	1	3	NA	1	1	1	2	10	7	7	5	2	3	3	NA	NA	1960	NA	NA	NA	2.6	753.846153846154	6	1
1737	145199169202274	10	2	68	6	6	7	4	69385	8	4	1	11	69	8	5	2	22	3	3	3	12	7	7	7	NA	NA	NA	7	8	NA	2	11	8	8	1	NA	4	4	NA	NA	NA	2100	NA	NA	1	2100	3	3
1738	145199169224808	10	2	61	5	5	7	4	92044	9	5	2	10	92	1	1	1	12	8	7	1	6	3	3	3	4	2	NA	2	3	3	2	10	7	7	2	0	6	6	NA	NA	NA	NA	NA	4600	1.5	3066.66666666667	2	3
1739	145199169292304	10	2	40	4	4	5	4	2737	1	1	6	1	2	4	2	2	19	10	9	1	9	3	3	3	3	1	NA	2	2	2	2	8	6	5	3	1	5	5	NA	NA	NA	NA	3900	NA	1.8	2166.66666666667	3	1
1740	145199169322021	10	1	45	4	4	5	2	32331	1	1	6	2	32	7	4	2	16	9	8	7	23	8	7	8	NA	NA	NA	8	8	NA	2	6	5	4	1	NA	1	1	730	NA	NA	NA	NA	NA	1	730	6	3
1741	145199169600599	10	2	75	7	6	8	4	34182	1	1	6	2	34	9	5	2	13	9	8	3	7	7	7	7	NA	NA	NA	7	8	NA	2	11	8	8	1	NA	4	4	NA	NA	NA	2040	NA	NA	1	2040	3	3
1742	145199169600600	10	2	67	6	6	7	4	63124	8	4	3	8	63	8	5	2	3	3	3	3	12	7	7	7	NA	NA	NA	7	8	NA	2	9	6	6	1	NA	3	3	NA	NA	1990	NA	NA	NA	1	1990	3	3
1743	145199169625179	10	2	56	5	5	6	4	88383	5	3	1	5	88	3	2	2	15	1	1	1	11	4	4	4	5	2	2	3	5	4	2	8	6	5	1	NA	4	4	NA	NA	NA	2500	NA	NA	1	2500	2	3
1744	145199169628253	10	2	73	6	6	8	4	17172	1	1	6	3	17	6	3	2	20	2	2	3	20	8	7	7	NA	NA	NA	7	8	NA	2	10	7	7	2	0	5	5	NA	NA	NA	NA	3500	NA	1.5	2333.33333333333	3	1
1745	145199169628256	10	2	70	6	6	8	4	91338	4	2	1	5	91	1	1	1	12	8	7	3	20	8	7	7	NA	NA	NA	7	8	NA	2	8	6	5	2	0	5	5	NA	NA	NA	NA	3900	NA	1.5	2600	2	1
1746	145199169637478	10	1	68	6	6	7	2	22362	3	2	1	3	22	6	3	2	6	5	5	3	6	7	7	7	NA	NA	NA	7	8	NA	2	10	7	7	1	NA	3	3	NA	NA	1800	NA	NA	NA	1	1800	4	3
1747	145199169654901	10	1	32	3	3	4	1	69383	8	4	1	11	69	8	5	2	22	3	3	1	9	3	3	3	3	1	NA	2	2	2	2	11	8	8	2	0	6	6	NA	NA	NA	NA	NA	4200	1.5	2800	2	1
1748	145199169664125	10	1	20	2	2	3	1	29019	8	4	1	11	29	6	3	2	6	5	5	5	NA	9	8	8	NA	NA	NA	6	8	NA	1	11	1	8	3	1	3	3	NA	NA	1700	NA	NA	NA	1.8	944.444444444444	5	1
1749	145199169856513	10	2	77	7	6	8	4	21231	8	4	1	11	21	4	2	2	5	4	4	3	18	8	7	7	NA	NA	NA	7	8	NA	2	2	2	1	2	0	7	7	NA	NA	NA	NA	NA	NA	NA	NA	NA	1
1750	145199169899570	10	1	28	3	3	3	1	33063	8	4	1	11	33	7	4	2	2	2	2	1	21	5	5	5	4	2	NA	2	3	3	2	8	6	5	3	1	4	4	NA	NA	NA	2300	NA	NA	1.8	1277.77777777778	5	1
1751	145199170099306	10	1	84	7	6	8	2	59410	8	4	4	8	59	2	2	2	17	10	9	3	25	8	7	7	NA	NA	NA	7	8	NA	2	8	6	5	2	0	3	3	NA	NA	1990	NA	NA	NA	1.5	1326.66666666667	4	1
1752	145199170123893	10	1	54	5	5	6	2	59142	1	1	6	1	59	2	2	2	17	10	9	1	24	6	6	6	3	1	NA	2	2	2	2	8	6	5	2	0	5	5	NA	NA	NA	NA	3350	NA	1.5	2233.33333333333	3	1
1753	145199170148352	10	2	63	5	5	7	4	35168	1	1	6	4	35	6	3	2	6	5	5	1	25	6	6	6	3	1	NA	2	2	2	2	5	4	3	2	0	7	7	NA	NA	NA	NA	NA	NA	NA	NA	NA	1
1754	145199170148475	10	1	78	7	6	8	2	86177	3	2	5	5	86	6	3	2	20	2	2	3	18	8	7	7	NA	NA	NA	7	8	NA	1	4	1	2	2	0	4	4	NA	NA	NA	2900	NA	NA	1.5	1933.33333333333	3	1
1755	145199170149382	10	2	60	5	5	7	4	66003	3	2	1	3	66	9	5	2	13	9	8	3	15	7	7	7	NA	NA	NA	7	8	NA	2	10	7	7	1	NA	3	3	NA	NA	1500	NA	NA	NA	1	1500	4	3
1756	145199170178061	10	1	30	3	3	4	1	49007	8	4	1	11	49	6	3	2	18	12	11	1	22	5	5	5	9	1	NA	2	2	2	2	10	7	7	4	2	4	4	NA	NA	NA	2900	NA	NA	2.1	1380.95238095238	4	1
1757	145199170190360	10	1	46	4	4	5	2	92022	9	5	2	8	92	1	1	1	12	8	7	1	11	4	4	4	3	1	NA	2	2	2	2	11	8	8	1	NA	3	3	NA	NA	1500	NA	NA	NA	1	1500	4	4
1758	145199170244672	10	2	76	7	6	8	4	13209	8	4	1	11	13	9	5	2	21	13	12	3	14	7	7	7	NA	NA	NA	7	8	NA	2	10	7	7	2	0	5	5	NA	NA	NA	NA	3350	NA	1.5	2233.33333333333	3	1
1759	145199170395171	10	1	58	5	5	6	2	80021	7	4	1	11	80	4	2	2	19	10	9	1	10	3	3	3	2	4	NA	2	1	1	2	2	2	1	2	0	5	5	NA	NA	NA	NA	3590	NA	1.5	2393.33333333333	3	1
1760	145199170520065	10	1	32	3	3	4	1	71076	6	3	1	9	71	4	2	2	5	4	4	1	23	6	6	6	3	1	NA	2	2	2	2	9	6	6	2	0	4	4	NA	NA	NA	2900	NA	NA	1.5	1933.33333333333	3	1
1761	145199170597957	10	1	58	5	5	6	2	26113	2	2	5	4	26	8	5	2	22	3	3	1	23	6	6	6	3	1	NA	2	2	2	2	7	5	4	3	0	3	3	NA	NA	1700	NA	NA	NA	2	850	6	3
1762	145199170716703	10	1	75	7	6	8	2	61358	4	2	3	1	61	5	3	2	4	11	10	3	19	8	7	7	NA	NA	NA	7	8	NA	2	5	4	3	2	0	5	5	NA	NA	NA	NA	3850	NA	1.5	2566.66666666667	2	1
1763	145199170733095	10	2	60	5	5	7	4	36169	1	1	6	1	36	5	3	2	7	6	6	1	2	2	2	2	1	3	NA	1	1	1	2	10	7	7	2	0	4	4	NA	NA	NA	2900	NA	NA	1.5	1933.33333333333	3	1
1764	145199170734123	10	2	68	6	6	7	4	83129	8	4	3	9	83	9	5	2	21	13	12	3	20	8	7	7	NA	NA	NA	7	8	NA	2	9	6	6	2	0	4	4	NA	NA	NA	2500	NA	NA	1.5	1666.66666666667	4	1
1765	145199170734124	10	1	50	5	5	6	2	38358	1	1	6	1	38	8	5	2	22	3	3	1	26	6	6	6	3	1	NA	2	2	2	2	7	5	4	3	0	3	3	NA	NA	1700	NA	NA	NA	2	850	6	1
1766	145199170742320	10	1	67	6	6	7	2	75120	9	5	1	11	75	1	1	1	12	8	7	3	9	7	7	7	NA	NA	NA	7	8	NA	2	6	5	4	1	NA	7	7	NA	NA	NA	NA	NA	NA	NA	NA	NA	3
1767	145199170758720	10	2	26	3	3	3	3	67506	8	4	2	5	67	3	2	2	1	1	1	1	17	4	4	4	4	2	NA	2	3	3	2	8	6	5	1	NA	2	2	NA	1304	NA	NA	NA	NA	1	1304	5	2
1768	145199170773067	10	1	51	5	5	6	2	74281	6	3	1	9	74	8	5	2	22	3	3	7	2	7	7	8	NA	NA	NA	8	8	NA	2	6	5	4	1	NA	1	1	900	NA	NA	NA	NA	NA	1	900	5	3
1769	145199170806882	10	2	48	4	4	5	4	13213	8	4	1	11	13	9	5	2	21	13	12	1	22	5	5	5	9	1	NA	2	2	2	2	6	5	4	4	1	4	4	NA	NA	NA	2500	NA	NA	2.3	1086.95652173913	5	1
1770	145199171190808	10	2	32	3	3	4	3	31113	8	4	3	7	31	7	4	2	16	9	8	1	6	3	3	3	5	2	3	3	4	4	2	9	6	6	4	2	7	7	NA	NA	NA	NA	NA	NA	NA	NA	NA	1
1771	145199171190816	10	2	44	4	4	5	4	76217	5	3	1	8	76	5	3	2	11	11	10	2	22	5	5	5	9	1	NA	5	7	5	2	7	5	4	2	0	2	2	NA	1200	NA	NA	NA	NA	1.5	800	6	1
1772	145199171209282	10	1	49	4	4	5	2	78401	9	5	3	6	78	1	1	1	12	8	7	1	5	3	3	3	1	3	NA	1	1	1	2	11	8	8	5	1	5	5	NA	NA	NA	NA	3800	NA	2.8	1357.14285714286	4	1
1773	145199171213382	10	1	52	5	5	6	2	27670	1	1	6	1	27	5	3	2	11	11	10	1	23	6	6	6	3	1	NA	2	2	2	2	9	6	6	2	0	3	3	NA	NA	1988	NA	NA	NA	1.5	1325.33333333333	4	3
1774	145199171230797	10	2	77	7	6	8	4	6069	8	4	3	10	6	9	5	2	21	13	12	3	14	7	7	7	NA	NA	NA	7	8	NA	2	8	6	5	1	NA	2	2	NA	1499	NA	NA	NA	NA	1	1499	4	2
1775	145199171230801	10	1	77	7	6	8	2	8105	6	3	1	9	8	4	2	2	8	1	1	3	23	8	7	7	NA	NA	NA	7	8	NA	2	6	5	4	2	0	5	5	NA	NA	NA	NA	3200	NA	1.5	2133.33333333333	3	1
1776	145199171230802	10	1	38	4	4	4	2	82121	6	3	1	10	82	7	4	2	16	9	8	2	26	6	6	6	3	1	NA	5	7	5	2	9	6	6	3	0	2	2	NA	1240	NA	NA	NA	NA	2	620	6	4
1777	145199171236954	10	2	38	4	4	4	4	92026	9	5	2	10	92	1	1	1	12	8	7	6	9	7	7	8	NA	NA	NA	8	8	NA	2	10	7	7	3	2	2	2	NA	1250	NA	NA	NA	NA	1.6	781.25	6	1
1778	145199171244125	10	1	46	4	4	5	2	28216	1	1	6	1	28	5	3	2	7	6	6	1	22	5	5	5	9	1	NA	2	2	2	2	7	5	4	2	0	4	4	NA	NA	NA	2150	NA	NA	1.5	1433.33333333333	4	1
1779	145199171269742	10	1	41	4	4	5	2	2408	5	3	1	8	2	4	2	2	19	10	9	1	17	4	4	4	8	2	NA	2	3	3	2	9	6	6	1	NA	3	3	NA	NA	1650	NA	NA	NA	1	1650	4	3
1780	145199171284085	10	1	75	7	6	8	2	34249	2	2	5	3	34	9	5	2	13	9	8	3	9	7	7	7	NA	NA	NA	7	8	NA	2	11	8	8	2	0	5	5	NA	NA	NA	NA	3900	NA	1.5	2600	2	1
1781	145199171676199	10	1	76	7	6	8	2	69179	1	1	6	4	69	8	5	2	22	3	3	3	17	7	7	7	NA	NA	NA	7	8	NA	2	6	5	4	2	0	6	6	NA	NA	NA	NA	NA	4200	1.5	2800	2	1
1782	145199171692638	10	1	25	3	3	3	1	38565	8	4	2	6	38	8	5	2	22	3	3	1	26	6	6	6	3	1	NA	2	2	2	2	8	6	5	2	0	5	5	NA	NA	NA	NA	3500	NA	1.5	2333.33333333333	3	1
1783	145199171701874	10	1	80	7	6	8	2	63193	8	4	3	5	63	8	5	2	3	3	3	3	7	7	7	7	NA	NA	NA	7	8	NA	2	11	8	8	2	0	6	6	NA	NA	NA	NA	NA	4500	1.5	3000	2	1
1784	145199171735672	10	2	60	5	5	7	4	73011	5	3	1	7	73	8	5	2	22	3	3	7	5	7	7	8	NA	NA	NA	8	8	NA	2	11	8	8	2	0	7	7	NA	NA	NA	NA	NA	NA	NA	NA	NA	1
1785	145199171757183	10	1	71	6	6	8	2	22005	1	1	6	2	22	6	3	2	6	5	5	3	24	8	7	7	NA	NA	NA	7	8	NA	2	6	5	4	2	0	4	4	NA	NA	NA	2700	NA	NA	1.5	1800	4	1
1786	145199171760128	10	1	71	6	6	8	2	17306	5	3	1	7	17	6	3	2	20	2	2	3	19	8	7	7	NA	NA	NA	7	8	NA	2	4	3	2	2	0	5	5	NA	NA	NA	NA	3700	NA	1.5	2466.66666666667	2	1
1787	145199171768333	10	2	26	3	3	3	3	78123	9	5	4	7	78	1	1	1	12	8	7	1	20	5	5	5	3	1	NA	2	2	2	2	9	6	6	2	0	4	4	NA	NA	NA	2500	NA	NA	1.5	1666.66666666667	4	1
1788	145199171769360	10	1	81	7	6	8	2	72068	1	1	6	2	72	6	3	2	18	12	11	3	25	8	7	7	NA	NA	NA	7	8	NA	2	7	5	4	1	NA	4	4	NA	NA	NA	2300	NA	NA	1	2300	3	3
1789	145199171769363	10	2	38	4	4	4	4	66195	8	4	4	5	66	9	5	2	13	9	8	1	21	5	5	5	1	3	NA	1	1	1	1	8	1	5	3	2	4	4	NA	NA	NA	2965	NA	NA	1.6	1853.125	4	1
1790	145199171792927	10	2	50	5	5	6	4	91691	9	5	2	8	91	1	1	1	12	8	7	1	22	5	5	5	9	1	NA	2	2	2	2	2	2	1	3	0	7	7	NA	NA	NA	NA	NA	NA	NA	NA	NA	1
1791	145199171814454	10	2	21	2	2	3	3	35281	8	4	4	7	35	6	3	2	6	5	5	1	20	5	5	5	3	1	NA	2	2	2	1	11	1	8	4	0	5	5	NA	NA	NA	NA	3600	NA	2.5	1440	4	1
1792	145199171845198	10	2	20	2	2	3	3	75111	9	5	1	11	75	1	1	1	12	8	7	5	NA	9	8	8	NA	NA	NA	6	8	NA	1	8	1	5	1	NA	1	1	200	NA	NA	NA	NA	NA	1	200	6	4
1793	145199172136032	10	2	20	2	2	3	3	35238	8	4	1	11	35	6	3	2	6	5	5	5	NA	9	8	8	NA	NA	NA	6	8	NA	1	11	1	8	5	0	7	7	NA	NA	NA	NA	NA	NA	NA	NA	NA	4
1794	145199172147318	10	2	67	6	6	7	4	59116	2	2	2	1	59	2	2	2	17	10	9	3	20	8	7	7	NA	NA	NA	7	8	NA	2	6	5	4	2	0	7	7	NA	NA	NA	NA	NA	NA	NA	NA	NA	1
1795	145199172150393	10	1	55	5	5	6	2	64024	8	4	1	9	64	7	4	2	2	2	2	1	16	4	4	4	6	2	2	3	5	4	2	10	7	7	2	0	5	5	NA	NA	NA	NA	3700	NA	1.5	2466.66666666667	2	1
1796	145199172160637	10	1	66	6	6	7	2	29273	4	2	3	3	29	6	3	2	6	5	5	3	16	7	7	7	NA	NA	NA	7	8	NA	2	6	5	4	2	0	3	3	NA	NA	1900	NA	NA	NA	1.5	1266.66666666667	5	1
1797	145199172186134	10	2	60	5	5	7	4	86145	1	1	6	2	86	6	3	2	20	2	2	1	22	5	5	5	9	1	NA	2	2	2	2	3	2	1	4	0	3	3	NA	NA	1980	NA	NA	NA	2.5	792	6	1
1798	145199172186135	10	2	24	2	2	3	3	68287	2	2	5	4	68	3	2	2	1	1	1	5	NA	9	8	8	NA	NA	NA	6	8	NA	1	10	1	7	4	0	6	6	NA	NA	NA	NA	NA	6500	2.5	2600	2	4
1799	145199172186136	10	2	54	5	5	6	4	30007	6	3	1	9	30	9	5	2	13	9	8	1	14	4	4	4	5	2	2	3	5	4	2	8	6	5	3	0	6	6	NA	NA	NA	NA	NA	7000	2	3500	1	1
1800	145199172214827	10	2	42	4	4	5	4	88481	1	1	6	2	88	3	2	2	15	1	1	1	23	6	6	6	2	4	NA	2	1	1	2	10	7	7	3	0	4	4	NA	NA	NA	2200	NA	NA	2	1100	5	1
1801	145199172289618	10	1	51	5	5	6	2	60395	4	2	5	7	60	4	2	2	19	10	9	1	27	6	6	6	9	1	NA	2	2	2	2	2	2	1	1	NA	3	3	NA	NA	1580	NA	NA	NA	1	1580	4	4
1802	145199172306006	10	1	60	5	5	7	2	34172	8	4	1	11	34	9	5	2	13	9	8	1	3	2	2	2	1	3	NA	1	1	1	2	11	8	8	2	0	3	3	NA	NA	1800	NA	NA	NA	1.5	1200	5	1
1803	145199172316253	10	2	22	2	2	3	3	13001	8	4	3	11	13	9	5	2	21	13	12	5	NA	9	8	8	NA	NA	NA	6	8	NA	1	11	1	8	1	NA	3	3	NA	NA	1800	NA	NA	NA	1	1800	4	4
1804	145199172499565	10	2	30	3	3	4	3	92050	9	5	4	10	92	1	1	1	12	8	7	1	27	6	6	6	3	1	NA	2	2	2	1	8	1	5	4	2	2	2	NA	1200	NA	NA	NA	NA	2.1	571.428571428571	6	1
1805	145199172608054	10	2	60	5	5	7	4	3230	1	1	6	1	3	8	5	2	3	3	3	1	25	6	6	6	3	1	NA	2	2	2	2	6	5	4	1	NA	1	1	960	NA	NA	NA	NA	NA	1	960	5	3
1806	145199172652146	10	2	34	3	3	4	3	51312	1	1	6	1	51	4	2	2	8	1	1	1	18	5	5	5	5	2	2	3	5	4	2	9	6	6	4	2	5	5	NA	NA	NA	NA	3150	NA	2.1	1500	4	1
1807	145199172662291	10	2	66	6	6	7	4	64445	7	4	1	10	64	7	4	2	2	2	2	3	21	8	7	7	NA	NA	NA	7	8	NA	2	7	5	4	2	0	4	4	NA	NA	NA	2250	NA	NA	1.5	1500	4	1
1808	145199172665370	10	1	75	7	6	8	2	25372	1	1	6	1	25	3	2	2	10	4	4	3	27	8	7	7	NA	NA	NA	7	8	NA	2	6	5	4	1	NA	2	2	NA	1470	NA	NA	NA	NA	1	1470	4	3
1809	145199172675622	10	1	27	3	3	3	1	75111	9	5	1	11	75	1	1	1	12	8	7	1	16	4	4	4	3	1	NA	2	2	2	2	10	7	7	3	1	6	6	NA	NA	NA	NA	NA	4700	1.8	2611.11111111111	2	1
1810	145199172686898	10	1	63	5	5	7	2	71548	1	1	6	1	71	4	2	2	5	4	4	2	15	4	4	4	3	1	NA	5	7	5	2	11	8	8	2	0	3	3	NA	NA	1953	NA	NA	NA	1.5	1302	5	1
1811	145199172696118	10	1	52	5	5	6	2	59350	8	4	1	11	59	2	2	2	17	10	9	1	19	5	5	5	5	2	2	3	5	4	2	9	6	6	3	1	4	4	NA	NA	NA	2700	NA	NA	1.8	1500	4	1
1812	145199172708418	10	2	70	6	6	8	4	59163	8	4	3	8	59	2	2	2	17	10	9	3	9	7	7	7	NA	NA	NA	7	8	NA	2	4	3	2	1	NA	3	3	NA	NA	1885	NA	NA	NA	1	1885	3	3
1813	145199172726860	10	1	43	4	4	5	2	35236	5	3	1	5	35	6	3	2	6	5	5	1	22	5	5	5	1	3	NA	1	1	1	2	10	7	7	1	NA	2	2	NA	1100	NA	NA	NA	NA	1	1100	5	2
1814	145199172754532	10	1	71	6	6	8	2	80021	7	4	1	11	80	4	2	2	19	10	9	3	17	7	7	7	NA	NA	NA	7	8	NA	2	10	7	7	2	0	6	6	NA	NA	NA	NA	NA	5300	1.5	3533.33333333333	1	1
1815	145199173051516	10	2	18	2	2	2	3	59151	1	1	6	2	59	2	2	2	17	10	9	5	NA	9	8	8	NA	NA	NA	6	8	NA	1	8	1	5	5	0	5	5	NA	NA	NA	NA	3700	NA	3	1233.33333333333	5	4
1816	145199173098538	10	2	38	4	4	4	4	94081	9	5	4	10	94	1	1	1	12	8	7	1	20	5	5	5	3	1	NA	2	2	2	2	10	7	7	4	2	4	4	NA	NA	NA	2527	NA	NA	2.1	1203.33333333333	5	1
1817	145199173098541	10	1	44	4	4	5	2	67482	8	4	1	11	67	3	2	2	1	1	1	1	16	4	4	4	3	1	NA	2	2	2	2	10	7	7	2	0	7	7	NA	NA	NA	NA	NA	NA	NA	NA	NA	1
1818	145199173104686	10	2	77	7	6	8	4	40006	1	1	6	1	40	7	4	2	2	2	2	3	7	7	7	7	NA	NA	NA	7	8	NA	2	11	8	8	2	0	5	5	NA	NA	NA	NA	3800	NA	1.5	2533.33333333333	2	1
1819	145199173125186	10	1	46	4	4	5	2	91587	9	5	2	5	91	1	1	1	12	8	7	1	15	4	4	4	3	1	NA	2	2	2	2	11	8	8	4	2	6	6	NA	NA	NA	NA	NA	5500	2.1	2619.04761904762	2	1
1820	145199173144652	10	1	42	4	4	5	2	77243	9	5	3	8	77	1	1	1	12	8	7	1	17	4	4	4	3	1	NA	2	2	2	2	10	7	7	5	2	6	6	NA	NA	NA	NA	NA	6200	2.6	2384.61538461538	3	1
1821	145199173144654	10	2	32	3	3	4	3	54395	8	4	1	11	54	3	2	2	15	1	1	1	18	5	5	5	3	1	NA	2	2	2	2	8	6	5	2	1	3	3	NA	NA	1800	NA	NA	NA	1.3	1384.61538461538	4	3
1822	145199173146703	10	2	69	6	6	7	4	68242	1	1	6	2	68	3	2	2	1	1	1	3	20	8	7	7	NA	NA	NA	7	8	NA	2	7	5	4	2	0	4	4	NA	NA	NA	2900	NA	NA	1.5	1933.33333333333	3	1
1823	145199173148752	10	2	57	5	5	6	4	84019	4	2	5	7	84	9	5	2	21	13	12	1	22	5	5	5	6	2	3	3	4	4	2	6	5	4	2	0	1	1	500	NA	NA	NA	NA	NA	1.5	333.333333333333	6	1
1824	145199173160018	10	1	54	5	5	6	2	59392	7	4	1	8	59	2	2	2	17	10	9	2	16	4	4	4	3	1	NA	5	7	5	2	10	7	7	2	0	5	5	NA	NA	NA	NA	3800	NA	1.5	2533.33333333333	2	1
1825	145199173507114	10	2	53	5	5	6	4	14228	4	2	1	5	14	5	3	2	4	11	10	1	17	4	4	4	3	1	NA	2	2	2	2	9	6	6	5	0	5	5	NA	NA	NA	NA	3200	NA	3	1066.66666666667	5	1
1826	145199173532742	10	2	19	2	2	2	3	76484	8	4	4	7	76	5	3	2	11	11	10	5	NA	9	8	8	NA	NA	NA	6	8	NA	1	10	1	7	4	0	7	7	NA	NA	NA	NA	NA	NA	NA	NA	NA	3
1827	145199173533794	10	2	37	4	4	4	4	85304	1	1	6	1	85	6	3	2	18	12	11	6	20	8	7	8	NA	NA	NA	8	8	NA	2	10	7	7	4	3	3	3	NA	NA	1900	NA	NA	NA	1.9	1000	5	3
1828	145199173538918	10	2	50	5	5	6	4	44009	8	4	2	5	44	6	3	2	18	12	11	1	15	4	4	4	1	3	NA	1	1	1	2	11	8	8	3	1	6	6	NA	NA	NA	NA	NA	4200	1.8	2333.33333333333	3	1
1829	145199173555315	10	1	87	7	6	8	2	37261	8	4	1	11	37	5	3	2	7	6	6	3	5	7	7	7	NA	NA	NA	7	8	NA	2	11	8	8	2	0	6	6	NA	NA	NA	NA	NA	5500	1.5	3666.66666666667	1	1
1830	145199173555316	10	1	76	7	6	8	2	17283	2	2	5	4	17	6	3	2	20	2	2	3	14	7	7	7	NA	NA	NA	7	8	NA	2	8	6	5	2	0	4	4	NA	NA	NA	2600	NA	NA	1.5	1733.33333333333	4	1
1831	145199173571706	10	2	56	5	5	6	4	49070	1	1	6	1	49	6	3	2	18	12	11	1	27	6	6	6	3	1	NA	2	2	2	2	3	2	1	2	0	3	3	NA	NA	1750	NA	NA	NA	1.5	1166.66666666667	5	1
1832	145199173574782	10	1	70	6	6	8	2	38547	8	4	3	5	38	8	5	2	22	3	3	3	15	7	7	7	NA	NA	NA	7	8	NA	2	9	6	6	2	0	4	4	NA	NA	NA	2900	NA	NA	1.5	1933.33333333333	3	1
1833	145199173642289	10	2	37	4	4	4	4	31149	8	4	3	9	31	7	4	2	16	9	8	1	21	5	5	5	3	1	NA	2	2	2	2	9	6	6	4	2	5	5	NA	NA	NA	NA	3300	NA	2.1	1571.42857142857	4	1
1834	145199173975053	10	2	60	5	5	7	4	50099	3	2	1	7	50	5	3	2	4	11	10	7	20	8	7	8	NA	NA	NA	8	8	NA	2	8	6	5	2	0	3	3	NA	NA	1800	NA	NA	NA	1.5	1200	5	1
1835	145199173981203	10	2	53	5	5	6	4	75120	9	5	1	11	75	1	1	1	12	8	7	1	12	4	4	4	7	2	2	3	5	4	2	8	6	5	4	0	4	4	NA	NA	NA	2200	NA	NA	2.5	880	6	1
1836	145199173985310	10	1	23	2	2	3	1	75108	9	5	1	11	75	1	1	1	12	8	7	5	NA	9	8	8	NA	NA	NA	6	8	NA	1	11	1	8	1	NA	2	2	NA	1250	NA	NA	NA	NA	1	1250	5	2
1837	145199173986336	10	2	38	4	4	4	4	4090	1	1	6	1	4	9	5	2	21	13	12	1	18	5	5	5	5	2	2	3	5	4	2	10	7	7	3	1	5	5	NA	NA	NA	NA	3500	NA	1.8	1944.44444444444	3	1
1838	145199173992486	10	2	58	5	5	6	4	92012	9	5	2	11	92	1	1	1	12	8	7	2	9	3	3	3	4	2	NA	5	7	5	2	10	7	7	2	0	4	4	NA	NA	NA	2600	NA	NA	1.5	1733.33333333333	4	1
1839	145199174032435	10	1	42	4	4	5	2	35236	5	3	1	5	35	6	3	2	6	5	5	1	21	5	5	5	3	1	NA	2	2	2	2	7	5	4	3	1	2	2	NA	1100	NA	NA	NA	NA	1.8	611.111111111111	6	1
1840	145199174052927	10	1	68	6	6	7	2	6161	8	4	2	7	6	9	5	2	21	13	12	3	10	7	7	7	NA	NA	NA	7	8	NA	2	10	7	7	1	NA	2	2	NA	1445	NA	NA	NA	NA	1	1445	4	3
1841	145199174480912	10	2	18	2	2	2	3	49099	6	3	1	10	49	6	3	2	18	12	11	5	NA	9	8	8	NA	NA	NA	6	8	NA	1	8	1	5	3	0	7	7	NA	NA	NA	NA	NA	NA	NA	NA	NA	3
1842	145199174481939	10	2	79	7	6	8	4	77373	9	5	3	9	77	1	1	1	12	8	7	3	18	8	7	7	NA	NA	NA	7	8	NA	2	5	4	3	2	0	5	5	NA	NA	NA	NA	3000	NA	1.5	2000	3	1
1843	145199174486043	10	1	41	4	4	5	2	90010	6	3	1	9	90	3	2	2	10	4	4	1	16	4	4	4	3	1	NA	2	2	2	2	10	7	7	3	1	4	4	NA	NA	NA	2600	NA	NA	1.8	1444.44444444444	4	1
1844	145199174487076	10	1	81	7	6	8	2	94028	9	5	4	10	94	1	1	1	12	8	7	3	7	7	7	7	NA	NA	NA	7	8	NA	2	11	8	8	2	0	7	7	NA	NA	NA	NA	NA	NA	NA	NA	NA	1
1845	145199174487078	10	2	45	4	4	5	4	92044	9	5	2	10	92	1	1	1	12	8	7	1	9	3	3	3	3	1	NA	2	2	2	2	11	8	8	1	NA	4	4	NA	NA	NA	2100	NA	NA	1	2100	3	3
1846	145199174514737	10	2	80	7	6	8	4	38140	4	2	1	5	38	8	5	2	22	3	3	3	8	7	7	7	NA	NA	NA	7	8	NA	2	11	8	8	1	NA	3	3	NA	NA	1900	NA	NA	NA	1	1900	3	4
1847	145199174531135	10	2	26	3	3	3	3	50294	6	3	2	2	50	5	3	2	4	11	10	1	15	4	4	4	3	1	NA	2	2	2	2	10	7	7	3	1	5	5	NA	NA	NA	NA	3200	NA	1.8	1777.77777777778	4	1
1848	145199174558805	10	2	68	6	6	7	4	31555	8	4	1	11	31	7	4	2	16	9	8	3	12	7	7	7	NA	NA	NA	7	8	NA	2	10	7	7	1	NA	3	3	NA	NA	1730	NA	NA	NA	1	1730	4	3
1849	145199174756465	10	2	24	2	2	3	3	59183	7	4	1	10	59	2	2	2	17	10	9	1	20	5	5	5	3	1	NA	2	2	2	2	11	8	8	2	0	4	4	NA	NA	NA	2500	NA	NA	1.5	1666.66666666667	4	1
1850	145199174785043	10	2	21	2	2	3	3	13002	8	4	2	8	13	9	5	2	21	13	12	5	NA	9	8	8	NA	NA	NA	6	8	NA	1	11	1	8	3	0	7	7	NA	NA	NA	NA	NA	NA	NA	NA	NA	4
1851	145199174833182	10	1	70	6	6	8	2	33422	8	4	2	5	33	7	4	2	2	2	2	3	6	7	7	7	NA	NA	NA	7	8	NA	2	10	7	7	2	0	5	5	NA	NA	NA	NA	3900	NA	1.5	2600	2	1
1852	145199174938730	10	2	22	2	2	3	3	94017	9	5	4	10	94	1	1	1	12	8	7	5	NA	9	8	8	NA	NA	NA	6	8	NA	1	8	1	5	2	0	2	2	NA	1490	NA	NA	NA	NA	1.5	993.333333333333	5	1
1853	145199174952992	10	2	35	4	4	4	4	91457	9	5	2	4	91	1	1	1	12	8	7	1	18	5	5	5	2	4	NA	2	1	1	1	9	1	6	5	2	6	6	NA	NA	NA	NA	NA	4500	2.6	1730.76923076923	4	1
1854	145199174968362	10	1	77	7	6	8	2	69387	8	4	1	11	69	8	5	2	22	3	3	3	5	7	7	7	NA	NA	NA	7	8	NA	2	11	8	8	2	0	5	5	NA	NA	NA	NA	3900	NA	1.5	2600	2	1
1855	145199174977587	10	1	57	5	5	6	2	81065	6	3	1	9	81	7	4	2	16	9	8	1	24	6	6	6	9	1	NA	2	2	2	2	6	5	4	2	0	4	4	NA	NA	NA	2500	NA	NA	1.5	1666.66666666667	4	1
1856	145199175033936	10	1	50	5	5	6	2	78124	9	5	2	7	78	1	1	1	12	8	7	1	9	3	3	3	2	4	NA	2	1	1	2	11	8	8	4	1	6	6	NA	NA	NA	NA	NA	4500	2.3	1956.52173913043	3	1
1857	145199175052387	10	2	65	6	6	7	4	42052	3	2	1	4	42	8	5	2	22	3	3	3	20	8	7	7	NA	NA	NA	7	8	NA	2	7	5	4	2	0	4	4	NA	NA	NA	2550	NA	NA	1.5	1700	4	1
1858	145199175161915	10	2	18	2	2	2	3	67218	8	4	3	8	67	3	2	2	1	1	1	5	NA	9	8	8	NA	NA	NA	6	8	NA	1	5	1	3	3	0	7	7	NA	NA	NA	NA	NA	NA	NA	NA	NA	4
1859	145199175504999	10	2	51	5	5	6	4	94046	9	5	2	10	94	1	1	1	12	8	7	1	24	6	6	6	3	1	NA	2	2	2	2	10	7	7	2	0	6	6	NA	NA	NA	NA	NA	4200	1.5	2800	2	1
1860	145199175510134	10	1	52	5	5	6	2	57589	2	2	1	3	57	3	2	2	15	1	1	1	5	3	3	3	1	3	NA	1	1	1	2	10	7	7	2	0	7	7	NA	NA	NA	NA	NA	NA	NA	NA	NA	1
1861	145199175523454	10	1	77	7	6	8	2	76540	8	4	1	11	76	5	3	2	11	11	10	3	10	7	7	7	NA	NA	NA	7	8	NA	2	11	8	8	2	0	5	5	NA	NA	NA	NA	3999	NA	1.5	2666	2	1
1862	145199175536647	10	1	36	4	4	4	2	39476	1	1	6	2	39	3	2	2	10	4	4	1	25	6	6	6	3	1	NA	2	2	2	2	7	5	4	4	2	4	4	NA	NA	NA	2900	NA	NA	2.1	1380.95238095238	4	1
1863	145199175587881	10	2	39	4	4	4	4	85109	4	2	5	7	85	6	3	2	18	12	11	1	20	5	5	5	3	1	NA	2	2	2	2	10	7	7	4	2	5	5	NA	NA	NA	NA	3400	NA	2.1	1619.04761904762	4	1
1864	145199175594031	10	1	54	5	5	6	2	31555	8	4	1	11	31	7	4	2	16	9	8	1	20	5	5	5	9	1	NA	2	2	2	2	7	5	4	1	NA	2	2	NA	1072	NA	NA	NA	NA	1	1072	5	3
1865	145199175866400	10	2	47	4	4	5	4	49183	1	1	6	4	49	6	3	2	18	12	11	1	29	6	6	6	3	1	NA	2	2	2	2	7	5	4	4	0	5	5	NA	NA	NA	NA	3500	NA	2.5	1400	4	1
1866	145199175914599	10	1	25	3	3	3	1	95585	9	5	4	10	95	1	1	1	12	8	7	4	NA	10	8	8	NA	NA	NA	5	8	5	1	4	1	2	3	1	1	1	950	NA	NA	NA	NA	NA	1.8	527.777777777778	6	1
1867	145199175962737	10	1	34	3	3	4	1	57176	2	2	1	2	57	3	2	2	15	1	1	1	9	3	3	3	3	1	NA	2	2	2	2	10	7	7	4	2	4	4	NA	NA	NA	2100	NA	NA	2.1	1000	5	1
1868	145199176115269	10	2	20	2	2	3	3	63150	5	3	2	2	63	8	5	2	3	3	3	5	NA	9	8	8	NA	NA	NA	6	8	NA	1	8	1	5	4	0	6	6	NA	NA	NA	NA	NA	5000	2.5	2000	3	2
1869	145199176383604	10	2	25	3	3	3	3	33261	1	1	6	2	33	7	4	2	2	2	2	1	15	4	4	4	3	1	NA	2	2	2	2	10	7	7	4	0	7	7	NA	NA	NA	NA	NA	NA	NA	NA	NA	4
1870	145212880169009	10	1	40	4	4	5	2	56121	7	4	1	10	56	6	3	2	6	5	5	1	20	5	5	5	3	1	NA	2	2	2	2	11	8	8	3	1	3	3	NA	NA	1800	NA	NA	NA	1.8	1000	5	1
1871	145212880191545	10	2	77	7	6	8	4	77108	9	5	3	10	77	1	1	1	12	8	7	3	14	7	7	7	NA	NA	NA	7	8	NA	2	11	8	8	1	NA	7	7	NA	NA	NA	NA	NA	NA	NA	NA	NA	3
1872	145212880218191	10	1	70	6	6	8	2	18050	2	2	5	3	18	5	3	2	7	6	6	3	6	7	7	7	NA	NA	NA	7	8	NA	2	10	7	7	1	NA	4	4	NA	NA	NA	2300	NA	NA	1	2300	3	3
1873	145212880256100	10	2	50	5	5	6	4	80211	1	1	6	2	80	4	2	2	19	10	9	1	12	4	4	4	3	1	NA	2	2	2	2	10	7	7	1	NA	4	4	NA	NA	NA	2300	NA	NA	1	2300	3	3
1874	145212880335978	10	2	31	3	3	4	3	59550	8	4	4	3	59	2	2	2	17	10	9	6	21	8	7	8	NA	NA	NA	8	8	NA	2	10	7	7	4	2	2	2	NA	1200	NA	NA	NA	NA	2.1	571.428571428571	6	1
1875	145212880406651	10	2	75	7	6	8	4	29232	6	3	1	10	29	6	3	2	6	5	5	3	20	8	7	7	NA	NA	NA	7	8	NA	2	6	5	4	1	NA	2	2	NA	1440	NA	NA	NA	NA	1	1440	4	4
1876	145212880585830	10	1	24	2	2	3	1	21355	8	4	4	5	21	4	2	2	5	4	4	2	20	5	5	5	3	1	NA	5	7	5	2	11	8	8	4	2	2	2	NA	1270	NA	NA	NA	NA	2.1	604.761904761905	6	1
1877	145212880605191	10	2	42	4	4	5	4	44139	1	1	6	2	44	6	3	2	18	12	11	1	22	5	5	5	4	2	NA	2	3	3	2	7	5	4	4	1	3	3	NA	NA	1600	NA	NA	NA	2.3	695.652173913043	6	3
1878	145212880731138	10	2	65	6	6	7	4	76636	1	1	6	3	76	5	3	2	11	11	10	3	6	7	7	7	NA	NA	NA	7	8	NA	2	11	8	8	2	0	6	6	NA	NA	NA	NA	NA	5000	1.5	3333.33333333333	1	1
1879	145212880761887	10	1	23	2	2	3	1	67525	1	1	6	2	67	3	2	2	1	1	1	1	29	6	6	6	3	1	NA	2	2	2	2	10	7	7	2	0	5	5	NA	NA	NA	NA	3500	NA	1.5	2333.33333333333	3	1
1880	145212880901224	10	2	43	4	4	5	4	79293	1	1	6	2	79	6	3	2	20	2	2	1	27	6	6	6	3	1	NA	2	2	2	2	9	6	6	2	1	2	2	NA	1165	NA	NA	NA	NA	1.3	896.153846153846	5	3
1881	145212880920701	10	2	44	4	4	5	4	27666	1	1	6	1	27	5	3	2	11	11	10	1	17	4	4	4	3	1	NA	2	2	2	2	10	7	7	4	0	6	6	NA	NA	NA	NA	NA	4200	2.5	1680	4	1
1882	145212880951301	10	1	52	5	5	6	2	8090	2	2	1	3	8	4	2	2	8	1	1	7	21	8	7	8	NA	NA	NA	8	8	NA	2	6	5	4	3	0	6	6	NA	NA	NA	NA	NA	5300	2	2650	2	3
1883	145212880955398	10	1	77	7	6	8	2	66149	3	2	1	5	66	9	5	2	13	9	8	3	9	7	7	7	NA	NA	NA	7	8	NA	2	7	5	4	2	0	3	3	NA	NA	1900	NA	NA	NA	1.5	1266.66666666667	5	1
1884	145212881019948	10	2	76	7	6	8	4	6030	8	4	4	9	6	9	5	2	21	13	12	3	9	7	7	7	NA	NA	NA	7	8	NA	2	10	7	7	1	NA	4	4	NA	NA	NA	2900	NA	NA	1	2900	2	4
1885	145212881232982	10	1	59	5	5	6	2	71409	1	1	6	1	71	4	2	2	5	4	4	1	9	3	3	3	3	1	NA	2	2	2	2	11	8	8	2	0	6	6	NA	NA	NA	NA	NA	4600	1.5	3066.66666666667	2	1
1886	145212881232994	10	2	19	2	2	2	3	4123	1	1	6	2	4	9	5	2	21	13	12	5	NA	9	8	8	NA	NA	NA	6	8	NA	1	8	1	5	4	0	7	7	NA	NA	NA	NA	NA	NA	NA	NA	NA	4
1887	145212881232996	10	1	28	3	3	3	1	94076	9	5	4	10	94	1	1	1	12	8	7	6	23	8	7	8	NA	NA	NA	8	8	NA	2	10	7	7	2	0	4	4	NA	NA	NA	2700	NA	NA	1.5	1800	4	2
1888	145212881241197	10	2	69	6	6	7	4	72154	4	2	5	7	72	6	3	2	18	12	11	3	17	7	7	7	NA	NA	NA	7	8	NA	2	4	3	2	2	0	7	7	NA	NA	NA	NA	NA	NA	NA	NA	NA	1
1889	145212881277975	10	2	49	4	4	5	4	86262	1	1	6	1	86	6	3	2	20	2	2	6	3	7	7	8	NA	NA	NA	8	8	NA	2	9	6	6	2	0	4	4	NA	NA	NA	2100	NA	NA	1.5	1400	4	1
1890	145212881416247	10	1	39	4	4	4	2	83061	6	3	1	10	83	9	5	2	21	13	12	1	9	3	3	3	3	1	NA	2	2	2	2	11	8	8	2	0	6	6	NA	NA	NA	NA	NA	4200	1.5	2800	2	1
1891	145212881439839	10	1	43	4	4	5	2	91687	9	5	3	9	91	1	1	1	12	8	7	1	26	6	6	6	3	1	NA	2	2	2	2	10	7	7	3	1	5	5	NA	NA	NA	NA	3800	NA	1.8	2111.11111111111	3	1
1892	145212881471603	10	1	29	3	3	3	1	45232	8	4	2	8	45	5	3	2	7	6	6	1	20	5	5	5	3	1	NA	2	2	2	2	10	7	7	2	0	5	5	NA	NA	NA	NA	3250	NA	1.5	2166.66666666667	3	1
1893	145212881636464	10	1	22	2	2	3	1	95585	9	5	4	10	95	1	1	1	12	8	7	2	16	4	4	4	3	1	NA	5	7	5	2	11	8	8	3	0	3	3	NA	NA	1900	NA	NA	NA	2	950	5	4
1894	145212881646647	10	1	32	3	3	4	1	22234	1	1	6	2	22	6	3	2	6	5	5	1	17	4	4	4	3	1	NA	2	2	2	2	10	7	7	5	2	4	4	NA	NA	NA	2600	NA	NA	2.6	1000	5	1
1895	145212881694828	10	1	49	4	4	5	2	56168	3	2	3	3	56	6	3	2	6	5	5	3	3	7	7	7	NA	NA	NA	7	8	NA	2	2	2	1	4	1	2	2	NA	1250	NA	NA	NA	NA	2.3	543.478260869565	6	1
1896	145212881716342	10	2	49	4	4	5	4	62041	6	3	1	9	62	2	2	2	17	10	9	1	28	6	6	6	3	1	NA	2	2	2	2	5	4	3	2	0	1	1	400	NA	NA	NA	NA	NA	1.5	266.666666666667	6	3
1897	145212881921115	10	1	25	3	3	3	1	59350	8	4	1	11	59	2	2	2	17	10	9	1	17	4	4	4	3	1	NA	2	2	2	1	11	1	8	2	0	2	2	NA	1222	NA	NA	NA	NA	1.5	814.666666666667	6	1
1898	145212881921119	10	1	40	4	4	5	2	67205	2	2	5	4	67	3	2	2	1	1	1	1	30	10	8	8	1	3	NA	1	1	1	2	4	3	2	5	2	1	1	950	NA	NA	NA	NA	NA	2.6	365.384615384615	6	1
1899	145212881959037	10	1	23	2	2	3	1	83068	4	2	3	4	83	9	5	2	21	13	12	5	NA	9	8	8	NA	NA	NA	6	8	NA	1	8	1	5	3	0	5	5	NA	NA	NA	NA	3586	NA	2	1793	4	2
1900	145212882059309	10	2	69	6	6	7	4	77122	9	5	3	8	77	1	1	1	12	8	7	3	16	7	7	7	NA	NA	NA	7	8	NA	2	10	7	7	1	NA	4	4	NA	NA	NA	2300	NA	NA	1	2300	3	3
1901	145212882074645	10	2	51	5	5	6	4	75113	9	5	1	11	75	1	1	1	12	8	7	1	20	5	5	5	3	1	NA	2	2	2	2	7	5	4	1	NA	3	3	NA	NA	1700	NA	NA	NA	1	1700	4	2
1902	145212882076703	10	1	51	5	5	6	2	41132	1	1	6	1	41	5	3	2	7	6	6	1	22	5	5	5	2	4	NA	2	1	1	2	10	7	7	1	NA	1	1	960	NA	NA	NA	NA	NA	1	960	5	2
1903	145212882076706	10	2	50	5	5	6	4	62746	6	3	4	5	62	2	2	2	17	10	9	1	11	4	4	4	5	2	3	3	4	4	2	10	7	7	2	0	4	4	NA	NA	NA	2990	NA	NA	1.5	1993.33333333333	3	1
1904	145212882103353	10	2	70	6	6	8	4	92051	9	5	2	10	92	1	1	1	12	8	7	3	9	7	7	7	NA	NA	NA	7	8	NA	2	11	8	8	2	0	6	6	NA	NA	NA	NA	NA	5000	1.5	3333.33333333333	1	1
1905	145212882125899	10	1	21	2	2	3	1	33063	8	4	1	11	33	7	4	2	2	2	2	1	21	5	5	5	3	1	NA	2	2	2	1	11	1	8	1	NA	7	7	NA	NA	NA	NA	NA	NA	NA	NA	NA	2
1906	145212882366495	10	1	75	7	6	8	2	11262	6	3	5	10	11	9	5	2	13	9	8	3	5	7	7	7	NA	NA	NA	7	8	NA	2	11	8	8	1	NA	3	3	NA	NA	1560	NA	NA	NA	1	1560	4	3
1907	145212882367524	10	2	75	7	6	8	4	69387	8	4	1	11	69	8	5	2	22	3	3	3	12	7	7	7	NA	NA	NA	7	8	NA	2	11	8	8	1	NA	4	4	NA	NA	NA	2000	NA	NA	1	2000	3	3
1908	145212882376746	10	2	35	4	4	4	4	69091	8	4	4	7	69	8	5	2	22	3	3	1	17	4	4	4	3	1	NA	2	2	2	2	10	7	7	2	0	5	5	NA	NA	NA	NA	3700	NA	1.5	2466.66666666667	2	1
1909	145212882385973	10	1	41	4	4	5	2	75116	9	5	1	11	75	1	1	1	12	8	7	1	23	6	6	6	3	1	NA	2	2	2	1	7	1	4	3	1	4	4	NA	NA	NA	2900	NA	NA	1.8	1611.11111111111	4	1
1910	145212882391096	10	2	66	6	6	7	4	92025	9	5	3	10	92	1	1	1	12	8	7	3	8	7	7	7	NA	NA	NA	7	8	NA	2	11	8	8	1	NA	1	1	860	NA	NA	NA	NA	NA	1	860	6	3
1911	145212882391098	10	2	41	4	4	5	4	35243	2	2	1	3	35	6	3	2	6	5	5	1	18	5	5	5	6	2	2	3	5	4	1	10	1	7	5	2	6	6	NA	NA	NA	NA	NA	6000	2.6	2307.69230769231	3	1
1912	145212882600982	10	2	42	4	4	5	4	85047	5	3	1	8	85	6	3	2	18	12	11	1	15	4	4	4	1	3	NA	1	1	1	2	7	5	4	7	4	5	5	NA	NA	NA	NA	3500	NA	3.2	1093.75	5	1
1913	145212882600987	10	2	51	5	5	6	4	75117	9	5	1	11	75	1	1	1	12	8	7	2	3	2	2	2	1	3	NA	5	7	5	2	8	6	5	1	NA	1	1	700	NA	NA	NA	NA	NA	1	700	6	3
1914	145212882610214	10	1	76	7	6	8	2	75113	9	5	1	11	75	1	1	1	12	8	7	3	10	7	7	7	NA	NA	NA	7	8	NA	2	11	8	8	2	0	6	6	NA	NA	NA	NA	NA	4200	1.5	2800	2	1
1915	145212882653241	10	2	66	6	6	7	4	61011	1	1	6	1	61	5	3	2	4	11	10	3	20	8	7	7	NA	NA	NA	7	8	NA	2	8	6	5	2	0	5	5	NA	NA	NA	NA	3400	NA	1.5	2266.66666666667	3	1
1916	145212883234900	10	2	23	2	2	3	3	83137	8	4	1	11	83	9	5	2	21	13	12	1	18	5	5	5	5	2	3	3	4	4	2	11	8	8	5	0	7	7	NA	NA	NA	NA	NA	NA	NA	NA	NA	3
1917	145212883263511	10	1	41	4	4	5	2	31555	8	4	1	11	31	7	4	2	16	9	8	1	18	5	5	5	1	3	NA	1	1	1	1	11	1	8	4	2	6	6	NA	NA	NA	NA	NA	5200	2.1	2476.19047619048	2	1
1918	145212883335182	10	1	35	4	4	4	2	75109	9	5	1	11	75	1	1	1	12	8	7	1	10	3	3	3	3	1	NA	2	2	2	2	11	8	8	1	NA	5	5	NA	NA	NA	NA	3800	NA	1	3800	1	2
1919	145212883339357	10	1	52	5	5	6	2	27037	1	1	6	2	27	5	3	2	11	11	10	1	23	6	6	6	3	1	NA	2	2	2	2	6	5	4	3	1	4	4	NA	NA	NA	2350	NA	NA	1.8	1305.55555555556	5	1
1920	145212883385464	10	2	61	5	5	7	4	13091	3	2	5	5	13	9	5	2	21	13	12	1	3	2	2	2	1	3	NA	1	1	1	2	9	6	6	2	0	7	7	NA	NA	NA	NA	NA	NA	NA	NA	NA	1
1921	145212883401728	10	1	63	5	5	7	2	83061	6	3	1	10	83	9	5	2	21	13	12	1	12	4	4	4	7	2	2	3	5	4	2	10	7	7	3	0	5	5	NA	NA	NA	NA	3200	NA	2	1600	4	1
1922	145212883531823	10	2	33	3	3	4	3	89024	5	3	1	9	89	4	2	2	5	4	4	4	NA	10	8	8	NA	NA	NA	5	8	5	2	8	6	5	1	NA	1	1	750	NA	NA	NA	NA	NA	1	750	6	4
1923	145212883574784	10	2	66	6	6	7	4	69273	8	4	3	7	69	8	5	2	22	3	3	3	21	8	7	7	NA	NA	NA	7	8	NA	2	7	5	4	1	NA	1	1	480	NA	NA	NA	NA	NA	1	480	6	3
1924	145212883594307	10	2	28	3	3	3	3	67482	8	4	1	11	67	3	2	2	1	1	1	2	20	5	5	5	9	1	NA	5	7	5	2	10	7	7	2	0	3	3	NA	NA	1800	NA	NA	NA	1.5	1200	5	2
1925	145212883657853	10	1	37	4	4	4	2	84123	1	1	6	2	84	9	5	2	21	13	12	1	3	2	2	2	1	3	NA	1	1	1	2	11	8	8	1	NA	2	2	NA	1200	NA	NA	NA	NA	1	1200	5	2
1926	145212883839074	10	1	61	5	5	7	2	67482	8	4	1	11	67	3	2	2	1	1	1	3	9	7	7	7	NA	NA	NA	7	8	NA	2	8	6	5	2	0	6	6	NA	NA	NA	NA	NA	4200	1.5	2800	2	1
1927	145212883876984	10	2	30	3	3	4	3	91661	9	5	2	7	91	1	1	1	12	8	7	1	10	3	3	3	3	1	NA	2	2	2	2	11	8	8	4	2	4	4	NA	NA	NA	2800	NA	NA	2.1	1333.33333333333	4	1
1928	145212883886083	10	2	52	5	5	6	4	53210	1	1	6	2	53	6	3	2	18	12	11	1	25	6	6	6	3	1	NA	2	2	2	2	10	7	7	2	0	4	4	NA	NA	NA	2100	NA	NA	1.5	1400	4	1
1929	145212883936306	10	2	30	3	3	4	3	51088	1	1	6	1	51	4	2	2	8	1	1	1	22	5	5	5	3	1	NA	2	2	2	2	9	6	6	4	2	4	4	NA	NA	NA	2400	NA	NA	2.1	1142.85714285714	5	1
1930	145212883975180	10	2	53	5	5	6	4	67358	1	1	6	1	67	3	2	2	1	1	1	7	24	8	7	8	NA	NA	NA	8	8	NA	2	6	5	4	2	0	2	2	NA	1450	NA	NA	NA	NA	1.5	966.666666666667	5	1
1931	145212884022388	10	1	30	3	3	4	1	78551	9	5	2	9	78	1	1	1	12	8	7	1	26	6	6	6	4	2	NA	2	3	3	2	9	6	6	1	NA	3	3	NA	NA	1750	NA	NA	NA	1	1750	4	3
1932	145212884056170	10	2	60	5	5	7	4	21387	1	1	6	1	21	4	2	2	5	4	4	1	27	6	6	6	3	1	NA	2	2	2	2	6	5	4	2	0	4	4	NA	NA	NA	2200	NA	NA	1.5	1466.66666666667	4	1
1933	145212884062317	10	2	54	5	5	6	4	42218	8	4	1	11	42	8	5	2	22	3	3	2	12	4	4	4	3	1	NA	5	7	5	2	10	7	7	1	NA	4	4	NA	NA	NA	2700	NA	NA	1	2700	2	3
1934	145212884122639	10	1	23	2	2	3	1	37261	8	4	1	11	37	5	3	2	7	6	6	2	21	5	5	5	3	1	NA	5	7	5	2	10	7	7	2	0	3	3	NA	NA	1800	NA	NA	NA	1.5	1200	5	3
1935	145212884209723	10	1	52	5	5	6	2	31555	8	4	1	11	31	7	4	2	16	9	8	1	26	6	6	6	3	1	NA	2	2	2	2	8	6	5	3	1	4	4	NA	NA	NA	2800	NA	NA	1.8	1555.55555555556	4	1
1936	145212884379680	10	2	35	4	4	4	4	60463	7	4	1	7	60	4	2	2	19	10	9	1	20	5	5	5	3	1	NA	2	2	2	2	9	6	6	5	3	4	4	NA	NA	NA	2956	NA	NA	2.4	1231.66666666667	5	1
1937	145212884392045	10	1	51	5	5	6	2	85191	6	3	5	10	85	6	3	2	18	12	11	1	15	4	4	4	3	1	NA	2	2	2	2	10	7	7	3	0	5	5	NA	NA	NA	NA	3950	NA	2	1975	3	1
1938	145212884392047	10	1	44	4	4	5	2	94037	9	5	4	7	94	1	1	1	12	8	7	1	3	2	2	2	1	3	NA	1	1	1	2	11	8	8	2	0	6	6	NA	NA	NA	NA	NA	6000	1.5	4000	1	1
1939	145212884452382	10	1	36	4	4	4	2	21231	8	4	1	11	21	4	2	2	5	4	4	1	20	5	5	5	3	1	NA	2	2	2	2	10	7	7	4	2	4	4	NA	NA	NA	2700	NA	NA	2.1	1285.71428571429	5	1
1940	145212884560950	10	2	43	4	4	5	4	69034	8	4	2	9	69	8	5	2	22	3	3	1	17	4	4	4	3	1	NA	2	2	2	2	8	6	5	1	NA	2	2	NA	1250	NA	NA	NA	NA	1	1250	5	2
1941	145212884700271	10	2	32	3	3	4	3	13010	8	4	3	4	13	9	5	2	21	13	12	1	3	2	2	2	1	3	NA	1	1	1	2	11	8	8	3	1	2	2	NA	1400	NA	NA	NA	NA	1.8	777.777777777778	6	1
1942	145212884718716	10	2	50	5	5	6	4	21603	2	2	5	4	21	4	2	2	5	4	4	1	23	6	6	6	3	1	NA	2	2	2	2	5	4	3	4	0	4	4	NA	NA	NA	2800	NA	NA	2.5	1120	5	1
1943	145212884821080	10	1	18	2	2	2	1	95539	9	5	3	7	95	1	1	1	12	8	7	7	30	10	7	8	NA	NA	NA	8	8	NA	1	8	1	5	2	1	7	7	NA	NA	NA	NA	NA	NA	NA	NA	NA	4
1944	145212884829225	10	2	41	4	4	5	4	79185	1	1	6	4	79	6	3	2	20	2	2	1	17	4	4	4	3	1	NA	2	2	2	2	10	7	7	4	2	6	6	NA	NA	NA	NA	NA	4000	2.1	1904.7619047619	3	1
1945	145212884829236	10	2	54	5	5	6	4	62628	8	4	4	5	62	2	2	2	17	10	9	1	22	5	5	5	9	1	NA	2	2	2	2	6	5	4	4	0	2	2	NA	1300	NA	NA	NA	NA	2.5	520	6	1
1946	145212884907092	10	2	30	3	3	4	3	27679	3	2	5	5	27	5	3	2	11	11	10	1	22	5	5	5	9	1	NA	2	2	2	2	6	5	4	1	NA	7	7	NA	NA	NA	NA	NA	NA	NA	NA	NA	2
1947	145212884908119	10	2	70	6	6	8	4	56121	7	4	1	10	56	6	3	2	6	5	5	3	18	8	7	7	NA	NA	NA	7	8	NA	2	8	6	5	1	NA	3	3	NA	NA	1600	NA	NA	NA	1	1600	4	3
1948	145212884912220	10	2	42	4	4	5	4	59666	1	1	6	2	59	2	2	2	17	10	9	6	12	7	7	8	NA	NA	NA	8	8	NA	2	10	7	7	3	1	4	4	NA	NA	NA	2300	NA	NA	1.8	1277.77777777778	5	1
1949	145212885045368	10	1	47	4	4	5	2	59599	8	4	4	10	59	2	2	2	17	10	9	1	23	6	6	6	4	2	NA	2	3	3	2	6	5	4	5	0	4	4	NA	NA	NA	2999	NA	NA	3	999.666666666667	5	1
1950	145212885045369	10	2	49	4	4	5	4	33220	1	1	6	2	33	7	4	2	2	2	2	7	9	7	7	8	NA	NA	NA	8	8	NA	2	11	8	8	3	0	6	6	NA	NA	NA	NA	NA	6600	2	3300	1	3
1951	145212885146704	10	1	78	7	6	8	2	40184	3	2	5	5	40	7	4	2	2	2	2	3	4	7	7	7	NA	NA	NA	7	8	NA	2	11	8	8	1	NA	2	2	NA	1300	NA	NA	NA	NA	1	1300	5	3
1952	145212885262448	10	2	55	5	5	6	4	93051	9	5	3	10	93	1	1	1	12	8	7	1	15	4	4	4	4	2	NA	2	3	3	2	7	5	4	1	NA	4	4	NA	NA	NA	2200	NA	NA	1	2200	3	3
1953	145212885286014	10	1	46	4	4	5	2	62498	8	4	1	9	62	2	2	2	17	10	9	1	18	5	5	5	6	2	2	3	5	4	2	10	7	7	1	NA	7	7	NA	NA	NA	NA	NA	NA	NA	NA	NA	4
1954	145212885291008	10	2	34	3	3	4	3	82121	6	3	1	10	82	7	4	2	16	9	8	2	24	6	6	6	3	1	NA	5	7	5	2	5	4	3	4	2	3	3	NA	NA	1800	NA	NA	NA	2.1	857.142857142857	6	1
1955	145212885296131	10	1	68	6	6	7	2	63178	4	2	1	7	63	8	5	2	3	3	3	3	19	8	7	7	NA	NA	NA	7	8	NA	2	6	5	4	2	0	3	3	NA	NA	1950	NA	NA	NA	1.5	1300	5	1
1956	145212885296133	10	2	51	5	5	6	4	59098	8	4	3	4	59	2	2	2	17	10	9	1	12	4	4	4	7	2	2	3	5	4	2	10	7	7	3	0	6	6	NA	NA	NA	NA	NA	5500	2	2750	2	1
1957	145212885299206	10	1	54	5	5	6	2	54507	1	1	6	1	54	3	2	2	15	1	1	1	15	4	4	4	3	1	NA	2	2	2	2	10	7	7	1	NA	4	4	NA	NA	NA	2500	NA	NA	1	2500	2	3
1958	145212885313550	10	2	27	3	3	3	3	37141	1	1	6	1	37	5	3	2	7	6	6	1	22	5	5	5	9	1	NA	2	2	2	2	8	6	5	4	0	3	3	NA	NA	1999	NA	NA	NA	2.5	799.6	6	1
1959	145212885324825	10	1	76	7	6	8	2	95426	9	5	2	3	95	1	1	1	12	8	7	3	9	7	7	7	NA	NA	NA	7	8	NA	2	11	8	8	2	0	6	6	NA	NA	NA	NA	NA	5000	1.5	3333.33333333333	1	1
1960	145212885358685	10	1	19	2	2	2	1	89439	1	1	6	2	89	4	2	2	5	4	4	5	NA	9	8	8	NA	NA	NA	6	8	NA	1	9	1	6	3	0	5	5	NA	NA	NA	NA	3500	NA	2	1750	4	2
1961	145212885477426	10	2	37	4	4	4	4	14092	1	1	6	2	14	5	3	2	4	11	10	1	17	4	4	4	3	1	NA	2	2	2	1	10	1	7	4	2	3	3	NA	NA	1980	NA	NA	NA	2.1	942.857142857143	5	1
1962	145212885478468	10	2	35	4	4	4	4	95680	9	5	4	8	95	1	1	1	12	8	7	1	21	5	5	5	3	1	NA	2	2	2	2	8	6	5	2	1	2	2	NA	1400	NA	NA	NA	NA	1.3	1076.92307692308	5	3
1963	145212885483604	10	1	64	5	5	7	2	54580	5	3	1	6	54	3	2	2	15	1	1	1	4	2	2	2	2	4	NA	2	1	1	2	11	8	8	2	0	6	6	NA	NA	NA	NA	NA	7000	1.5	4666.66666666667	1	1
1964	145212885505140	10	1	53	5	5	6	2	21278	8	4	2	5	21	4	2	2	5	4	4	1	4	2	2	2	2	4	NA	2	1	1	2	11	8	8	2	0	6	6	NA	NA	NA	NA	NA	6500	1.5	4333.33333333333	1	1
1965	145212885520391	10	2	49	4	4	5	4	35047	8	4	3	7	35	6	3	2	6	5	5	1	20	5	5	5	3	1	NA	2	2	2	2	10	7	7	3	0	5	5	NA	NA	NA	NA	3200	NA	2	1600	4	1
1966	145212885524497	10	1	25	3	3	3	1	75118	9	5	1	11	75	1	1	1	12	8	7	1	16	4	4	4	3	1	NA	2	2	2	1	8	1	5	5	1	4	4	NA	NA	NA	2695	NA	NA	2.8	962.5	5	3
1967	145212885525532	10	2	35	4	4	4	4	62193	7	4	1	10	62	2	2	2	17	10	9	1	14	4	4	4	3	1	NA	2	2	2	1	11	1	8	3	1	4	4	NA	NA	NA	2600	NA	NA	1.8	1444.44444444444	4	1
1968	145212885722114	10	2	51	5	5	6	4	84098	3	2	4	1	84	9	5	2	21	13	12	1	22	5	5	5	3	1	NA	2	2	2	2	9	6	6	4	1	2	2	NA	1499	NA	NA	NA	NA	2.3	651.739130434783	6	1
1969	145212885725242	10	2	27	3	3	3	3	37139	8	4	3	5	37	5	3	2	7	6	6	1	18	5	5	5	7	2	2	3	5	4	2	6	5	4	3	1	2	2	NA	1400	NA	NA	NA	NA	1.8	777.777777777778	6	1
1970	145212885742697	10	2	41	4	4	5	4	82125	3	2	5	5	82	7	4	2	16	9	8	1	12	4	4	4	3	1	NA	2	2	2	2	9	6	6	5	2	5	5	NA	NA	NA	NA	3500	NA	2.6	1346.15384615385	4	1
1971	145212885764218	10	2	44	4	4	5	4	3114	1	1	6	1	3	8	5	2	3	3	3	7	3	7	7	8	NA	NA	NA	8	8	NA	2	9	6	6	3	0	2	2	NA	1400	NA	NA	NA	NA	2	700	6	1
1972	145212885774337	10	1	46	4	4	5	2	86070	3	2	5	5	86	6	3	2	20	2	2	1	18	5	5	5	7	2	2	3	5	4	2	9	6	6	2	0	7	7	NA	NA	NA	NA	NA	NA	NA	NA	NA	2
1973	145212885776387	10	1	49	4	4	5	2	33281	8	4	3	10	33	7	4	2	2	2	2	7	12	7	7	8	NA	NA	NA	8	8	NA	2	8	6	5	1	NA	2	2	NA	1350	NA	NA	NA	NA	1	1350	4	3
1974	145212885952586	10	1	42	4	4	5	2	78311	9	5	2	9	78	1	1	1	12	8	7	1	6	3	3	3	4	2	NA	2	3	3	2	10	7	7	1	NA	7	7	NA	NA	NA	NA	NA	NA	NA	NA	NA	4
1975	145212886005847	10	2	66	6	6	7	4	78062	3	2	1	5	78	1	1	1	12	8	7	3	9	7	7	7	NA	NA	NA	7	8	NA	2	11	8	8	2	0	6	6	NA	NA	NA	NA	NA	6666	1.5	4444	1	1
1976	145212886029411	10	2	36	4	4	4	4	68271	8	4	2	7	68	3	2	2	1	1	1	1	12	4	4	4	6	2	3	3	4	4	2	10	7	7	1	NA	3	3	NA	NA	1500	NA	NA	NA	1	1500	4	3
1977	145212886043755	10	1	66	6	6	7	2	13043	8	4	3	6	13	9	5	2	21	13	12	3	15	7	7	7	NA	NA	NA	7	8	NA	2	10	7	7	1	NA	3	3	NA	NA	1579	NA	NA	NA	1	1579	4	3
1978	145212886058102	10	2	53	5	5	6	4	44109	8	4	1	11	44	6	3	2	18	12	11	7	20	8	7	8	NA	NA	NA	8	8	NA	2	5	4	3	1	NA	2	2	NA	1117	NA	NA	NA	NA	1	1117	5	4
1979	145212886208522	10	2	39	4	4	4	4	81271	3	2	5	5	81	7	4	2	16	9	8	1	12	4	4	4	3	1	NA	2	2	2	1	9	1	6	5	2	5	5	NA	NA	NA	NA	3220	NA	2.6	1238.46153846154	5	1
1980	145212886209580	10	2	28	3	3	3	3	26023	1	1	6	2	26	8	5	2	22	3	3	1	16	4	4	4	3	1	NA	2	2	2	2	10	7	7	3	1	6	6	NA	NA	NA	NA	NA	4060	1.8	2255.55555555556	3	1
1981	145212886209581	10	2	40	4	4	5	4	20272	2	2	7	3	20	9	5	2	9	7	12	6	21	8	7	8	NA	NA	NA	8	8	NA	2	10	7	7	5	3	4	4	NA	NA	NA	2900	NA	NA	2.4	1208.33333333333	5	1
1982	145212886227004	10	2	50	5	5	6	4	27469	3	2	1	4	27	5	3	2	11	11	10	7	22	8	7	8	NA	NA	NA	8	8	NA	2	9	6	6	2	0	2	2	NA	1300	NA	NA	NA	NA	1.5	866.666666666667	6	3
1983	145212886227006	10	1	55	5	5	6	2	75114	9	5	1	11	75	1	1	1	12	8	7	1	12	4	4	4	7	2	3	3	4	4	2	11	8	8	1	NA	2	2	NA	1100	NA	NA	NA	NA	1	1100	5	4
1984	145212886237267	10	1	36	4	4	4	2	54159	5	3	1	6	54	3	2	2	15	1	1	1	9	3	3	3	3	1	NA	2	2	2	2	11	8	8	3	1	6	6	NA	NA	NA	NA	NA	5500	1.8	3055.55555555556	2	1
1985	145212886248548	10	1	75	7	6	8	2	40205	1	1	6	1	40	7	4	2	2	2	2	3	5	7	7	7	NA	NA	NA	7	8	NA	2	11	8	8	2	0	4	4	NA	NA	NA	2250	NA	NA	1.5	1500	4	1
1986	145212886333557	10	2	34	3	3	4	3	30021	1	1	6	1	30	9	5	2	13	9	8	1	1	1	1	1	1	3	NA	1	1	1	2	10	7	7	3	1	4	4	NA	NA	NA	2500	NA	NA	1.8	1388.88888888889	4	1
1987	145212886553613	10	1	50	5	5	6	2	8105	6	3	1	9	8	4	2	2	8	1	1	1	25	6	6	6	3	1	NA	2	2	2	2	6	5	4	3	0	4	4	NA	NA	NA	2999	NA	NA	2	1499.5	4	1
1988	145212886560793	10	1	51	5	5	6	2	82005	1	1	6	2	82	7	4	2	16	9	8	1	16	4	4	4	6	2	3	3	4	4	2	10	7	7	3	0	4	4	NA	NA	NA	2500	NA	NA	2	1250	5	3
1989	145212886593624	10	1	55	5	5	6	2	93005	9	5	4	10	93	1	1	1	12	8	7	1	22	5	5	5	3	1	NA	2	2	2	2	10	7	7	1	NA	1	1	436	NA	NA	NA	NA	NA	1	436	6	4
1990	145212886612080	10	1	34	3	3	4	1	60141	5	3	1	7	60	4	2	2	19	10	9	1	7	3	3	3	5	2	2	3	5	4	2	10	7	7	1	NA	4	4	NA	NA	NA	2200	NA	NA	1	2200	3	3
1991	145212886637603	10	1	42	4	4	5	2	57372	1	1	6	2	57	3	2	2	15	1	1	1	21	5	5	5	3	1	NA	2	2	2	2	10	7	7	2	0	4	4	NA	NA	NA	2100	NA	NA	1.5	1400	4	1
1992	145212886651954	10	2	26	3	3	3	3	67348	4	2	1	7	67	3	2	2	1	1	1	1	27	6	6	6	3	1	NA	2	2	2	2	10	7	7	2	0	4	4	NA	NA	NA	2500	NA	NA	1.5	1666.66666666667	4	1
1993	145212886714389	10	1	22	2	2	3	1	3185	6	3	1	9	3	8	5	2	3	3	3	1	23	6	6	6	9	1	NA	2	2	2	2	10	7	7	2	1	3	3	NA	NA	1800	NA	NA	NA	1.3	1384.61538461538	4	3
1994	145212886714390	10	2	41	4	4	5	4	17153	1	1	6	3	17	6	3	2	20	2	2	1	12	4	4	4	7	2	2	3	5	4	1	11	1	8	4	2	4	4	NA	NA	NA	2800	NA	NA	2.1	1333.33333333333	4	1
1995	145212886723615	10	2	75	7	6	8	4	47157	5	3	1	7	47	7	4	2	2	2	2	3	20	8	7	7	NA	NA	NA	7	8	NA	2	5	4	3	2	0	3	3	NA	NA	1885	NA	NA	NA	1.5	1256.66666666667	5	1
1996	145212886751279	10	1	28	3	3	3	1	57463	8	4	1	11	57	3	2	2	15	1	1	1	18	5	5	5	5	2	2	3	5	4	2	10	7	7	2	0	4	4	NA	NA	NA	2500	NA	NA	1.5	1666.66666666667	4	1
1997	145212886779977	10	1	36	4	4	4	2	88116	5	3	1	3	88	3	2	2	15	1	1	1	21	5	5	5	3	1	NA	2	2	2	2	8	6	5	5	3	4	4	NA	NA	NA	2780	NA	NA	2.4	1158.33333333333	5	1
1998	145212886788188	10	2	24	2	2	3	3	59202	6	3	3	5	59	2	2	2	17	10	9	1	20	5	5	5	8	2	NA	2	3	3	2	10	7	7	3	1	5	5	NA	NA	NA	NA	3800	NA	1.8	2111.11111111111	3	1
1999	145212886880337	10	2	29	3	3	3	3	28085	6	3	1	9	28	5	3	2	7	6	6	6	12	7	7	8	NA	NA	NA	8	8	NA	2	7	5	4	2	0	1	1	400	NA	NA	NA	NA	NA	1.5	266.666666666667	6	1
[truncated: 10 more rows]
[truncated: 130 more columns]
