# Supplementary material for: Beliefs and Risk Perceptions About COVID-19: Evidence From Two Successive French Representative Surveys During Lockdown
Source: Front Psychol. 2021 Feb 1;12:619145. doi: 10.3389/fpsyg.2021.619145 (PMC7882490; doi:10.3389/fpsyg.2021.619145)
Supplement: Supplementary file 2 [file Data_Sheet_1.ZIP › readme.txt]

- raw_data.txt: raw data transmitted by the poll institute
- Evidence_Region.txt: hospital data by region
- Evidence_Gender.txt: hospital data by gender
- Evidence_Age.txt: hospital data by age
- donnees-hospitalieres-covid19-2020-08-16-19h00.csv: raw administrative datafile use to - build Evidence_Gender.txt and Evidence_Region.txt
- donnees-hospitalieres-classe-age-covid19-2020-08-16-19h00.csv: raw administrative datafile use to build Evidence_Age.txt
- DATAset_used_in_manuscript.txt: recoded data, based on a raw_data.txt. Recoding file is available upon request (file: Preliminary.R).
